# Supplementary material for: Single cell characterization of B-lymphoid differentiation and leukemic cell states during chemotherapy in ETV6-RUNX1-positive pediatric leukemia identifies drug-targetable transcription factor activities
Source: Genome Med. 2020 Nov 20;12:99. doi: 10.1186/s13073-020-00799-2 (PMC7679990; doi:10.1186/s13073-020-00799-2)
Supplement: Supplementary file 4 — Additional file 4: Table S3. Supporting information related to scDD analysis. Cluster membership is indicated for significant genes from leukemic vs. pro-B comparison (against adult and pediatric BM cells), and from drug vs. ctrl (DMSO) cells in the ETS-inhibition experiments carried out in E/R+ REH cells. Includes statistical summaries for cell state comparisons related to Figs. 2 and 5. [file 13073_2020_799_MOESM4_ESM.xlsx]

## Sheet: README
Table S3. Supporting information related to scDD analysis
1	Genes in clusters	Significant genes from leukemic vs pro-B comparison were clustered. Cluster membership for each gene is indicated
2	Genes differentiation arrest	Comparison of normal pro-B to pre-B differential expression distribution to that observed in leukemic vs pro-B comparison
3	Genes unique to pediatric data
2020-04-08	scDD comparisons of B-lineage cell states in HCA healthy bone marrow	See column descriptions below
2020-09-14	scDD comparisons of B-lineage leukemic cell states against HCA reference
15-16	scDD comparisons of B-lineage leukemic cell states against Caron reference
17-20	scDD comparisons of REH cell treatments
scDD result table columns
gene	Gene symbol
DZ	Assigned category (1=yes, 0=no)
DE	Assigned category (1=yes, 0=no)
DM	Assigned category (1=yes, 0=no)
sign_by_zero	direction of regulation based on zero proportion
sign	direction of regulation based on non-zero mean comparison
zero.pvalue.adj	adjusted p-value for DZ
zero_proportion_difference	difference in zero proportion
c1.zero_proportion	class 1 zero proportion
c2.zero_proportion	class 2 zero proportion
nonzero.pvalue.adj	adjusted p-value for DE/DM
relative_difference	difference in max means
c1.maxmean	class 1 mean for the cluster with maximum expression level
c2.maxmean	class 2 mean for the cluster with maximum expression level
c1.celltype	class 1 cell type
c2.celltype	class 2 cell type
DM_nro_clusters_direction	direction of cluster number change for DM

## Sheet: genes_in_clusters
Related to Figure 3. Clustering result for differential genes (DZ) in leukemic vs. proB analysis. Clustering was done for the intersect of genes with differential zero proportion in G1 and G2MS comparisons.
cl1	cl2	cl3	cl4	cl5	cl6	cl7	cl8
ABHD3	ANKRD28	AKAP12	ALOX5	AIF1	ACAP1	ACTN1	BCL7A
AGPAT2	ARPC1B	ATP1B3	AP1B1	AL592183.1	AKAP13	ADA	CD19
ARFGAP2	C4orf48	CARHSP1	ARHGAP29	BNIP3L	AKNA	AMD1	CD52
ARHGAP30	CD63	CD38	ARL11	BST2	ARID5B	AP1S2	CD79B
ARID3A	CYTL1	CD9	ATF6B	C1orf228	ATP6V0E1	AP3S1	HIST1H2AC
ARRB2	FXYD5	CMTM7	BLCAP	CD97	BANK1	ARRDC3	HIST1H2BK
BAG6	GRN	CMTM8	BTK	CD99	BIN1	ATF4	HLA-DMA
BRK1	HCST	CYFIP2	BTN2A2	CEP68	CHCHD10	ATP5C1	HLA-DMB
C10orf32	ICAM3	FHIT	C19orf66	CLIC1	CNN2	BCL11A	HLA-DQB1
CARD8	IGJ	GADD45A	CBFA2T3	CMTM3	CYTH4	BCLAF1	HLA-E
CCDC115	LY6E	GADD45B	CD27	CORO1B	EMP3	C12orf57	ISG20
CD200	OCIAD2	HMHB1	CHD7	DRAM1	GPSM3	C14orf2	ORAI2
CD53	PLAC8	IGLL1	CIITA	EGFL7	HLA-DOB	CLEC11A	PCDH9
CHCHD7	PTPN6	MAD2L2	CMTM2	EMC10	HLA-DQA1	DONSON	PPM1K
CNPY3	RAC2	MND1	CPNE2	FAM101B	LTB	EID1	SNHG7
DAD1	RILPL2	MPP1	CSRP2	GNA15	PIK3IP1	EIF3M	TCL1A
DDAH2	SLC39A3	MPPED2	CTGF	GPX1	POLD4	ESD	TCL1B
DYNLL1	SRGN	MT1X	DENND3	GSN	RHOF	GYPC	TLE1
ECH1	TPI1	REXO2	DHTKD1	HEMGN	RNASET2	H2AFY	TXNIP
FAM107B	TUBA1A	2015-09-01	EIF4A2	HHEX	RNH1	HINT1
FBXW7		SF1	ERG	HSPB1	SMAGP	IGFBP7
FKBP1A		SIAH2	ERV3-1	IFITM2	SQSTM1	ITM2B
GNAI2		SLC44A1	EXOC7	LAPTM4A	TAPBP	ITM2C
HMHA1		SOD2	FADS3	LST1	VASP	JUND
IDI1		SUSD3	FAM212A	LYL1		KIAA0125
IFI16		TIFA	FAM69B	MAGED2		KLF10
INO80C		TLE4	FCGRT	MDK		KLF3
INSR		TOP2B	FUCA1	MFSD10		KLF6
KIF5B		VDAC1	FYB	MSN		LAT2
LYRM4		VPREB1	GIMAP4	MYADM		LDHB
MARCKSL1		VPS26B	GNG11	NEAT1		LITAF
MIB1		WTAP	GRINA	NEGR1		LSM7
MPRIP			H1F0	PSMB5		MSI2
MSH6			HAP1	PTPLA		MZT2B
MTCH1			HBA1	RHOC		NAP1L1
NCF4			HBA2	RP11-25K19.1		NDUFA1
NECAP2			HBB	SAMSN1		NDUFA4
NOSIP			HDAC7	SAT2		NENF
NUDT3			HLA-DOA	SCAMP2		ODC1
PDLIM7			HLA-F	SSU72		PDE4B
PKN1			IFI35	TFPI		PKIG
PPP1R18			INTS3	TGFB1		PRDX6
PTEN			IRF7	TPP1		RASGRP2
PTPN18			ISG15	TPTEP1		RBM3
RAB4B			ITGA6	VAMP5		RP1-3J17.3
RAB5C			JUP	VGLL4		RSL24D1
RAD23A			LAIR1	ZNF580		SEC61G
RFX5			LCN8			SEC63
RGS19			LILRA2			SERP1
RNF5			LINC00649			SLC25A5
RPA2			LINC00958			SNORA76
RSBN1L			LPAR6			SNRPD2
SEPHS2			MACROD2			TBCA
2006-09-01			MILR1			TMEM123
SERPINB9			MME			UBE2J1
SH3GLB2			MRVI1			UQCRH
SLC25A39			MX1			VIM
TMEM179B			MYO10			ZNF22
TRIM27			NARFL
TXNRD1			NPY
UBE2F			NRN1
USP11			PCLO
VAV1			PHYH
WDR45B			PIK3C3
WIPF1			PRKCB
ZDHHC3			PRX
ZNF672			PTK2
ZNF706			PTP4A3
			PYHIN1
			RNF213
			RP11-14N7.2
			RP11-18H21.1
			RP11-251M1.1
			RP11-301G19.1
			RP3-380B8.4
			SEMA6A
			SHISA5
			SLC27A3
			SLC35E3
			SMAD1
			SOCS2
			STAG3
			STK32B
			TCFL5
			TERF2
			TGFB1I1
			TMED6
			TRAF3IP2
			TSPAN7
			WASF2
			WBP1L
			WDR66
			WFS1
			WSB1

## Sheet: genes_diffArrest
Related to Figure 3. Genes related to proB-like differentiation state of the leukemic blasts.
Genes related to differentiation arrested cell state of leukemic cells were defined based on differential zero proportion status in G1 and S/G2/M comparisons of pro-B vs. pre-B and leukemic vs. pro-B analyses: 108 genes were significantly up-regulated in pro-B to pre-B transition of which 97 were not significant in the leukemic vs pro-B comparison. Similarly, 188 genes were significantly downregu…
up_in_proB-to-preB_not_in_leukemics (97)	down_in_proB-to-preB_not_in_leukemics (145)	up_in_proB-to-preB_AND_in_leukemics	down_in_proB-to-preB_AND_in_leukemics
IGLL5	DNTT	TCL1A	CD99
RGS2	SOCS2	PCDH9	SIAH2
CDC25B	XBP1	BCL7A	AKAP12
NSMCE1	TKT	SNHG7	MT1X
FAM129C	ZFP36L2	CD19	SOD2
IRF4	LCN6-1	MARCKSL1	HMHB1
CCDC112	HPS4	OCIAD2	ITM2B
CCDC42B	MEF2C	IGJ	GYPC
C7orf50	NEAT1	RGS19	PLAC8
NCF1	EGFL7	PPM1K	KLF3
C16orf74	GLRX	GRN	FHIT
KIAA0226L	FAM26F		TOP2B
SPIB	GNG11		ATP1B3
HCK	LINC01013		BCL11A
ERP29	GPX1		ADA
FCRLA	C5orf56		ZNF22
PTPRCAP	TXN		LAT2
AFF3	SYNGR1		ESD
CCDC69	MLXIP		PDE4B
LYN	PTGES3		SLC44A1
RHOH	DCK		KLF6
STIM2	SNX2		AP3S1
PLEKHA2	IFITM3		KLF10
DSTN	CYGB		SEC63
PPP1R14A	COMT		SUSD3
BACH2	SOD1		SEP15
ABHD15	TSC22D4		TLE4
WASF1	TP53INP1		AMD1
PDLIM1	MTF2		RASGRP2
HRK	GUK1		PRDX6
GLO1	PPP1R18		GADD45A
CDC40	ELK3		ACTN1
DBI	ERG		IGFBP7
CDKN2D	TSPAN14		ANKRD28
APBB2	CSRNP1		KIAA0125
UCP2	GBP4		CLEC11A
LDLRAD4	IER2		VPS26B
LAMP5	LTB		NENF
TFDP2	FXYD5		TMEM123
SPINT2	AIF1		LITAF
SYK	SERPINB1		MND1
LIMD2	VAMP5		RP1-3J17.3
JUNB	NDUFB1		SNORA76
VOPP1	HHEX
CXXC5	RABAC1
ZEB2	RPS4Y1
VAMP8	LRRFIP1
TAX1BP3	PEBP1
CD37	RTN4
MIR181A1HG	LINC00426
CHP1	TMEM59
MAPRE1	OSTC
PCGF5	PSMB9
DDX54	EIF4A1
APLP2	DUT
LSP1	ZCCHC7
AEBP1	CD34
FBXO25	TTC3
HERPUD1	CDCA7L
P2RX5	FKBP1A
PTPRC	SH3BGRL3
CD72	C1orf228
CD38	TSC22D3
PTPN2	TCF4
DTX1	NDUFB11
ODC1	APRT
CORO1A	MTDH
ITGAE	ENG
PRDX2	PPP3CC
ZFP36	PAG1
TERF1	FKBP8
PPP1R2	MYLK
ANXA2	MDM2
HIP1	SLC8A1-AS1
FAM65B	JUP
CAMK2D	RTN3
PIM1	NR3C1
CYB5R4	SYPL1
OGFRL1	RNASET2
YPEL5	ARL6IP5
MYL4	SMS
HSH2D	NPY
IFNGR2	PHB
C12orf75	EIF1AY
KLF2	TCEAL8
RP11-164H13.1	RCN2
GLUL	FNBP1
STX7	CALCOCO2
TP53I13	SVIP
PIM2	CLEC2B
FAM173A	SSR4
TBC1D1	MDK
GCHFR	PYURF
BLK	SEPT9
STRBP	TMED2
MTPN	GSTP1
KIAA0922	REL
	GIMAP2
	XRCC6
	NIPSNAP3A
	PDIA6
	IRF1
	SPRY1
	GSN
	PBXIP1
	PAFAH1B3
	HPCAL1
	SSBP1
	CACYBP
	NASP
	LEF1
	LST1
	CMPK1
	PYCARD
	ABRACL
	NRIP1
	CANX
	THOC7
	PARVG
	CDK6
	MGMT
	ACSS1
	STAG3
	ST3GAL1
	PLSCR1
	ENO1
	MYL6B
	KRTCAP2
	CFDP1
	ETS2
	LAIR1
	ANXA7
	JAK1
	CBX5
	IMPDH1
	FHL1
	ALOX5AP
	UBL3
	RANBP1
	CKLF
	SCCPDH
	MAGED1
	MGST2
	FERMT3
	EBPL

## Sheet: genes_unique_to_pediatric_data
Related to Figure 3. Genes found differentially expressed (DZ) only when data from Caron et al. 2020 (pediatric bone marrow) was used as a reference for the comparison of leukemic and progenitor B-cells, and not when data from Human Cell Atlas (adult bone marrow) was used. Comparison was done separately for G1 and S/G2/M cell cycle states of leukemic and progenitor B-cells (sheets 15-16), and 160…
NHP2L1
C12orf23
KLF4
LYZ
FOSB
GLUL
S100A8
MYB
AHSP
CCNL1
S100A9
DUSP1
PPP1R15A
TRAM1
JUNB
FOS

## Sheet: TBL_early.vs.HSC
gene	DZ	DE	DM	sign_by_DZ	sign_by_DE	zero.pvalue.adj	zero_proportion_difference	c1.zero_proportion	c2.zero_proportion	nonzero.pvalue.adj	relative_difference	c1.maxmean	c2.maxmean	c1.celltype	c2.celltype	DM_nro_clusters_direction
BST2	1	1	1	down	down	1.4617e-53	0.276321	0.277869	0.55419	0	-2.28748	3.59074	1.30326	1_HSC	2_earlyLymphoid	down
LSMD1	1	1	1	down	down	2.12022e-32	0.24198	0.41612	0.658101	9.85769e-07	-1.1655	2.44655	1.28105	1_HSC	2_earlyLymphoid	down
SYPL1	1	1	1	down	down	1.19112e-39	0.226694	0.394536	0.621229	8.81207e-07	-1.13139	2.37033	1.23894	1_HSC	2_earlyLymphoid	down
EBPL	1	1	1	down	down	1.28613e-47	0.264982	0.257923	0.522905	1.24178e-07	-1.03812	2.32149	1.28337	1_HSC	2_earlyLymphoid	down
NGFRAP1	1	0	1	down	NA	7.09405e-47	0.272765	0.293716	0.56648	8.37745e-05	-0.976473	2.2806	1.30412	1_HSC	2_earlyLymphoid	down
DNAJB6	1	1	1	down	down	1.80666e-19	0.176052	0.365847	0.541899	0.000624887	-1.02303	2.40108	1.37805	1_HSC	2_earlyLymphoid	down
HSD17B11	1	1	1	down	down	3.46664e-19	0.15332	0.336066	0.489385	3.20657e-05	-1.93006	3.42459	1.49453	1_HSC	2_earlyLymphoid	down
FBL	1	1	1	down	down	8.51771e-21	0.171956	0.232514	0.404469	8.23448e-09	-1.79776	3.24053	1.44278	1_HSC	2_earlyLymphoid	down
RSL1D1	1	1	1	down	down	1.79795e-16	0.142754	0.238251	0.381006	4.02002e-06	-1.79723	3.33333	1.5361	1_HSC	2_earlyLymphoid	down
C11orf31	1	0	1	up	NA	4.51188e-08	-0.119329	0.397541	0.278212	2.16289e-06	-0.616417	2.22942	1.613	1_HSC	2_earlyLymphoid	down
SLC25A3	1	1	1	up	down	2.24779e-11	-0.109487	0.237978	0.128492	2.91938e-10	-1.09136	3.47085	2.37949	1_HSC	2_earlyLymphoid	down
SLC25A5	1	1	1	up	down	2.09613e-19	-0.152187	0.289617	0.13743	5.49524e-10	-1.04713	3.62614	2.57902	1_HSC	2_earlyLymphoid	down
YWHAQ	1	0	1	up	NA	2.81252e-08	-0.112829	0.413388	0.300559	5.46796e-05	-0.592089	2.28218	1.6901	1_HSC	2_earlyLymphoid	down
PAIP2	1	0	1	up	NA	2.07119e-06	-0.10091	0.40929	0.30838	1.34377e-05	-0.613919	2.28112	1.66721	1_HSC	2_earlyLymphoid	down
COX7B	1	1	1	up	down	1.53873e-12	-0.130659	0.353005	0.222346	5.89526e-05	-1.3421	3.27457	1.93247	1_HSC	2_earlyLymphoid	down
SAP18	1	0	1	up	NA	2.4105e-08	-0.120811	0.443716	0.322905	4.82005e-07	-0.610025	2.24204	1.63201	1_HSC	2_earlyLymphoid	down
SEC61G	1	0	1	up	NA	9.89439e-14	-0.1407	0.378689	0.237989	1.22731e-06	-0.532986	2.34824	1.81525	1_HSC	2_earlyLymphoid	down
UBE2D3	1	0	1	up	NA	4.42018e-11	-0.132199	0.421585	0.289385	2.79364e-07	-0.474822	2.22325	1.74843	1_HSC	2_earlyLymphoid	down
SRSF2	1	1	1	up	down	2.59458e-09	-0.119397	0.381967	0.26257	1.8663e-07	-1.28045	3.38802	2.10758	1_HSC	2_earlyLymphoid	down
HNRNPM	1	0	1	up	NA	5.65691e-09	-0.114727	0.440984	0.326257	2.26035e-07	-0.54714	2.31994	1.7728	1_HSC	2_earlyLymphoid	down
ATP6V1G1	1	0	1	up	NA	5.12906e-11	-0.132332	0.378142	0.24581	9.37426e-11	-0.470741	2.25	1.77926	1_HSC	2_earlyLymphoid	down
RHOA	1	0	1	up	NA	1.2126e-13	-0.147881	0.394809	0.246927	9.62017e-13	-0.443663	2.25524	1.81157	1_HSC	2_earlyLymphoid	down
GTF3A	1	0	1	up	NA	3.69761e-16	-0.15879	0.419126	0.260335	0	-0.327881	2.31429	1.9864	1_HSC	2_earlyLymphoid	down
MYL6	1	0	1	up	NA	2.12105e-14	-0.125373	0.227049	0.101676	0	-0.631761	3.48624	2.85448	1_HSC	2_earlyLymphoid	down
ITM2C	1	0	1	up	NA	3.07621e-15	-0.14809	0.422951	0.27486	4.38855e-15	-0.210339	2.34131	2.13097	1_HSC	2_earlyLymphoid	down
HSPB1	1	0	0	down	NA	1.3389e-161	0.546433	0.227869	0.774302	0	-0.780069	2.01769	1.23762	1_HSC	2_earlyLymphoid	NA
AVP	1	0	0	down	NA	1.6243e-39	0.536739	0.456557	0.993296	NA	-3.97084	3.97084	0	1_HSC	2_earlyLymphoid	NA
MGST1	1	0	0	down	NA	3.92588e-103	0.524071	0.402186	0.926257	2.30516e-07	-0.758407	1.81901	1.06061	1_HSC	2_earlyLymphoid	NA
CSF3R	1	0	0	down	NA	6.42006e-81	0.444783	0.49153	0.936313	1	-0.213732	1.30145	1.08772	1_HSC	2_earlyLymphoid	NA
PRSS57	1	1	0	down	down	7.92488e-123	0.443502	0.196721	0.640223	0	-1.30232	2.68741	1.38509	1_HSC	2_earlyLymphoid	NA
CRHBP	1	0	0	down	NA	2.83206e-55	0.376883	0.603005	0.979888	NA	-1.72953	1.72953	0	1_HSC	2_earlyLymphoid	NA
ANXA1	1	0	0	down	NA	6.13627e-80	0.36235	0.290164	0.652514	2.7357e-06	-0.455178	2.1047	1.64952	1_HSC	2_earlyLymphoid	NA
APLP2	1	0	0	down	NA	3.12641e-65	0.3494	0.460656	0.810056	6.26168e-05	-0.297556	1.40932	1.11176	1_HSC	2_earlyLymphoid	NA
SRGN	1	1	0	down	down	3.36087e-77	0.346892	0.260929	0.607821	0	-1.38406	2.86839	1.48433	1_HSC	2_earlyLymphoid	NA
TALDO1	1	0	0	down	NA	6.41602e-93	0.341864	0.160929	0.502793	0	-0.615827	2.00684	1.39101	1_HSC	2_earlyLymphoid	NA
EREG	1	0	0	down	NA	2.06418e-39	0.311036	0.668852	0.979888	NA	-1.60396	1.60396	0	1_HSC	2_earlyLymphoid	NA
CYTL1	1	0	0	down	NA	2.43773e-61	0.310724	0.504918	0.815642	0.213229	-0.120179	1.37472	1.25455	1_HSC	2_earlyLymphoid	NA
TPI1	1	0	0	down	NA	2.554e-58	0.305361	0.239891	0.545251	0	-0.645148	2.28397	1.63882	1_HSC	2_earlyLymphoid	NA
EGFL7	1	0	0	down	NA	2.11822e-58	0.304178	0.349454	0.653631	0.202538	-1.01596	2.38692	1.37097	1_HSC	2_earlyLymphoid	NA
MLLT3	1	0	0	down	NA	6.0104e-58	0.299428	0.636885	0.936313	0.0355754	-0.355709	1.42588	1.07018	1_HSC	2_earlyLymphoid	NA
NPDC1	1	0	0	down	NA	2.62851e-52	0.295235	0.561749	0.856983	1	-0.0707216	1.21135	1.14062	1_HSC	2_earlyLymphoid	NA
ALDH1A1	1	0	0	down	NA	6.69258e-52	0.279127	0.678415	0.957542	NA	-0.152976	1.20561	1.05263	1_HSC	2_earlyLymphoid	NA
C1QTNF4	1	0	0	down	NA	1.23815e-41	0.277057	0.435792	0.712849	4.09481e-06	-0.502756	2.37046	1.8677	1_HSC	2_earlyLymphoid	NA
BEX1	1	0	0	down	NA	1.46381e-30	0.276185	0.70929	0.985475	NA	-1.71711	1.71711	0	1_HSC	2_earlyLymphoid	NA
SLC39A3	1	0	0	down	NA	1.25852e-51	0.274358	0.615027	0.889385	1	-0.11524	1.18595	1.07071	1_HSC	2_earlyLymphoid	NA
ITM2A	1	0	0	down	NA	2.26704e-47	0.273142	0.548087	0.821229	1	-0.076912	1.25816	1.18125	1_HSC	2_earlyLymphoid	NA
ANKRD28	1	0	0	down	NA	2.0998e-49	0.269758	0.234153	0.503911	0	-0.653726	2.32715	1.67342	1_HSC	2_earlyLymphoid	NA
CAT	1	0	0	down	NA	1.66554e-44	0.26959	0.351639	0.621229	0	-0.730721	2.00211	1.27139	1_HSC	2_earlyLymphoid	NA
CREG1	1	0	0	down	NA	7.98009e-48	0.26747	0.644262	0.911732	1	-0.0376927	1.08833	1.05063	1_HSC	2_earlyLymphoid	NA
NPR3	1	0	0	down	NA	4.88444e-47	0.267251	0.696995	0.964246	NA	-0.0571179	1.08837	1.03125	1_HSC	2_earlyLymphoid	NA
HOPX	1	0	0	down	NA	3.19178e-48	0.263458	0.414754	0.678212	0.194163	-1.43181	3.5325	2.10069	1_HSC	2_earlyLymphoid	NA
SERPINB1	1	1	0	down	down	3.53164e-71	0.25947	0.12377	0.38324	0	-1.02395	2.76489	1.74094	1_HSC	2_earlyLymphoid	NA
MEST	1	0	0	down	NA	3.4468e-42	0.25209	0.606011	0.858101	1	-0.0527756	1.13939	1.08661	1_HSC	2_earlyLymphoid	NA
ARL2	1	0	0	down	NA	1.1194e-37	0.251186	0.565574	0.81676	1	-0.0806719	1.16604	1.08537	1_HSC	2_earlyLymphoid	NA
RAB32	1	0	0	down	NA	1.55991e-33	0.250804	0.723497	0.974302	NA	-1.20356	1.20356	0	1_HSC	2_earlyLymphoid	NA
PCBD1	1	0	0	down	NA	2.69149e-43	0.25074	0.695628	0.946369	1	-0.0626496	1.08348	1.02083	1_HSC	2_earlyLymphoid	NA
PTMS	1	0	0	down	NA	9.67712e-50	0.246871	0.684973	0.931844	1	-0.0286921	1.20902	1.18033	1_HSC	2_earlyLymphoid	NA
CD34	1	0	0	down	NA	2.33401e-41	0.246048	0.560656	0.806704	1	0.0845268	1.22761	1.31214	1_HSC	2_earlyLymphoid	NA
AP001171.1	1	0	0	down	NA	2.40618e-38	0.245613	0.728689	0.974302	NA	-1.12991	1.12991	0	1_HSC	2_earlyLymphoid	NA
MDK	1	0	0	down	NA	1.08236e-40	0.24538	0.555738	0.801117	0.371871	-0.194404	1.56519	1.37079	1_HSC	2_earlyLymphoid	NA
IFITM3	1	0	0	down	NA	9.67989e-39	0.244334	0.496448	0.740782	1	-0.0720316	1.36082	1.28879	1_HSC	2_earlyLymphoid	NA
DNPH1	1	0	0	down	NA	9.70338e-34	0.237667	0.598087	0.835754	1	-0.0842409	1.16587	1.08163	1_HSC	2_earlyLymphoid	NA
NPW	1	0	0	down	NA	3.86698e-33	0.235138	0.722404	0.957542	NA	-0.20115	1.43799	1.23684	1_HSC	2_earlyLymphoid	NA
CRYGD	1	0	0	down	NA	1.26905e-36	0.233541	0.675956	0.909497	1	-0.0627589	1.11214	1.04938	1_HSC	2_earlyLymphoid	NA
CLEC11A	1	0	0	down	NA	4.95287e-33	0.23304	0.553552	0.786592	5.68927e-09	-0.872458	2.24419	1.37173	1_HSC	2_earlyLymphoid	NA
PTRF	1	0	0	down	NA	2.745e-23	0.232914	0.760383	0.993296	NA	-1.07868	1.07868	0	1_HSC	2_earlyLymphoid	NA
RAB13	1	0	0	down	NA	4.7939e-41	0.232559	0.644536	0.877095	1	-0.0916288	1.15527	1.06364	1_HSC	2_earlyLymphoid	NA
YBX3	1	0	0	down	NA	8.43194e-31	0.229575	0.523497	0.753073	1	-0.0278187	1.29931	1.27149	1_HSC	2_earlyLymphoid	NA
CLU	1	0	0	down	NA	1.35455e-12	0.229186	0.768579	0.997765	NA	-1.23613	1.23613	0	1_HSC	2_earlyLymphoid	NA
CD164	1	0	0	down	NA	3.76873e-43	0.227614	0.323224	0.550838	0	-0.893218	2.39322	1.5	1_HSC	2_earlyLymphoid	NA
TAOK3	1	0	0	down	NA	9.5237e-34	0.226642	0.467213	0.693855	0.00124607	-0.184091	1.34103	1.15693	1_HSC	2_earlyLymphoid	NA
S100A6	1	0	0	down	NA	2.51077e-31	0.22155	0.539344	0.760894	0.73436	-0.13889	1.41459	1.2757	1_HSC	2_earlyLymphoid	NA
LAPTM4B	1	0	0	down	NA	6.5183e-40	0.220948	0.687432	0.90838	1	-0.0308502	1.10402	1.07317	1_HSC	2_earlyLymphoid	NA
CTSG	1	0	0	down	NA	6.32063e-28	0.218066	0.75847	0.976536	NA	-1.41176	1.41176	0	1_HSC	2_earlyLymphoid	NA
BEX2	1	0	0	down	NA	5.20906e-34	0.217642	0.564481	0.782123	0.404316	-0.124238	1.21142	1.08718	1_HSC	2_earlyLymphoid	NA
TCEAL4	1	0	0	down	NA	3.08417e-31	0.216227	0.563661	0.779888	1	-0.0661583	1.17783	1.11168	1_HSC	2_earlyLymphoid	NA
MSRB3	1	0	0	down	NA	4.04708e-37	0.212996	0.706557	0.919553	1	-0.04027	1.08194	1.04167	1_HSC	2_earlyLymphoid	NA
SERPINB6	1	0	0	down	NA	2.68032e-31	0.211547	0.529235	0.740782	1	-0.0923885	1.19153	1.09914	1_HSC	2_earlyLymphoid	NA
LYL1	1	0	0	down	NA	1.78625e-37	0.209696	0.63388	0.843575	1	-0.110021	1.21716	1.10714	1_HSC	2_earlyLymphoid	NA
MBOAT7	1	0	0	down	NA	1.68719e-34	0.208925	0.636885	0.84581	1	-0.0391762	1.11889	1.07971	1_HSC	2_earlyLymphoid	NA
S100A4	1	0	0	down	NA	6.7138e-33	0.208891	0.260383	0.469274	0.228709	0.229271	2.09494	2.32421	1_HSC	2_earlyLymphoid	NA
SPINK2	1	1	0	down	up	2.79513e-64	0.205861	0.0622951	0.268156	6.82059e-12	1.2312	3.81002	5.04122	1_HSC	2_earlyLymphoid	NA
SEPP1	1	0	0	down	NA	2.5926e-30	0.20423	0.776776	0.981006	NA	-1.08568	1.08568	0	1_HSC	2_earlyLymphoid	NA
ICAM3	1	0	0	down	NA	3.66712e-29	0.203906	0.312295	0.516201	0.100342	-0.899017	2.37246	1.47344	1_HSC	2_earlyLymphoid	NA
VAMP5	1	0	0	down	NA	2.20446e-27	0.200745	0.533333	0.734078	1	-0.11534	1.32963	1.21429	1_HSC	2_earlyLymphoid	NA
GATA2	1	0	0	down	NA	1.68257e-26	0.195384	0.793443	0.988827	NA	-1.1164	1.1164	0	1_HSC	2_earlyLymphoid	NA
CD37	1	0	0	down	NA	1.8682e-28	0.192634	0.445355	0.637989	1	0.131104	1.84729	1.9784	1_HSC	2_earlyLymphoid	NA
TMEM173	1	0	0	down	NA	6.66008e-32	0.191243	0.645628	0.836872	1	-0.0208014	1.13724	1.11644	1_HSC	2_earlyLymphoid	NA
H1F0	1	0	0	down	NA	4.17318e-31	0.184979	0.665301	0.850279	1	-0.232452	1.50857	1.27612	1_HSC	2_earlyLymphoid	NA
ATP2C1	1	0	0	down	NA	1.13821e-28	0.183541	0.725956	0.909497	1	-0.0819886	1.10668	1.02469	1_HSC	2_earlyLymphoid	NA
FXYD5	1	0	0	down	NA	6.19784e-41	0.183252	0.100546	0.283799	0.123841	0.00997312	2.40188	2.41186	1_HSC	2_earlyLymphoid	NA
LINC00152	1	0	0	down	NA	8.40616e-29	0.176622	0.703825	0.880447	1	-0.0249853	1.09041	1.06542	1_HSC	2_earlyLymphoid	NA
CALR	1	1	0	down	down	9.32681e-19	0.175471	0.327322	0.502793	5.8514e-14	-1.09175	2.75467	1.66292	1_HSC	2_earlyLymphoid	NA
NEAT1	1	0	0	down	NA	9.39333e-22	0.173015	0.254918	0.427933	0.00522479	-0.237082	2.19802	1.96094	1_HSC	2_earlyLymphoid	NA
ARPC1B	1	0	0	down	NA	1.47216e-18	0.172613	0.399454	0.572067	1	-0.872162	2.20898	1.33681	1_HSC	2_earlyLymphoid	NA
TMED3	1	0	0	down	NA	1.38305e-23	0.170907	0.648087	0.818994	1	-0.00523349	1.09783	1.09259	1_HSC	2_earlyLymphoid	NA
LEPROT	1	0	0	down	NA	6.77064e-21	0.169126	0.630874	0.8	1	-0.083679	1.19541	1.11173	1_HSC	2_earlyLymphoid	NA
IFITM2	1	0	0	down	NA	3.34503e-16	0.16823	0.503279	0.671508	0.496752	-0.117981	1.38669	1.26871	1_HSC	2_earlyLymphoid	NA
HMGN5	1	0	0	down	NA	1.66277e-24	0.166396	0.758743	0.92514	1	-0.0628116	1.10759	1.04478	1_HSC	2_earlyLymphoid	NA
TNFSF13B	1	0	0	down	NA	9.17206e-19	0.164105	0.643716	0.807821	0.207077	-0.159224	1.29294	1.13372	1_HSC	2_earlyLymphoid	NA
IL1B	1	0	0	down	NA	4.96648e-30	0.162631	0.802732	0.965363	NA	0.0411938	1.15235	1.19355	1_HSC	2_earlyLymphoid	NA
GNA15	1	0	0	down	NA	1.69279e-17	0.161747	0.575683	0.73743	1	-0.0138921	1.22666	1.21277	1_HSC	2_earlyLymphoid	NA
TFPI	1	0	0	down	NA	1.46515e-28	0.16121	0.751639	0.912849	1	-0.0088855	1.08581	1.07692	1_HSC	2_earlyLymphoid	NA
MCL1	1	0	0	down	NA	2.3749e-19	0.160669	0.602459	0.763128	0.42095	-0.187178	1.47491	1.28774	1_HSC	2_earlyLymphoid	NA
PPA1	1	0	0	down	NA	8.86196e-14	0.157473	0.384426	0.541899	1	-0.794478	2.30911	1.51463	1_HSC	2_earlyLymphoid	NA
MATK	1	0	0	down	NA	1.34777e-18	0.157188	0.684153	0.841341	1	0.0270359	1.08564	1.11268	1_HSC	2_earlyLymphoid	NA
RGS10	1	0	0	down	NA	9.13474e-20	0.15684	0.618579	0.775419	1	-0.0180544	1.12751	1.10945	1_HSC	2_earlyLymphoid	NA
UQCC2	1	0	0	down	NA	6.07735e-20	0.15631	0.707377	0.863687	1	-0.00787528	1.09804	1.09016	1_HSC	2_earlyLymphoid	NA
WBP5	1	0	0	down	NA	5.98874e-22	0.155646	0.690164	0.84581	1	-0.00172533	1.10317	1.10145	1_HSC	2_earlyLymphoid	NA
MPO	1	1	0	down	down	1.49131e-16	0.154486	0.738251	0.892737	0	-6.94098	8.67015	1.72917	1_HSC	2_earlyLymphoid	NA
NCOA7	1	0	0	down	NA	2.69803e-24	0.153067	0.749727	0.902793	1	0.0456508	1.08079	1.12644	1_HSC	2_earlyLymphoid	NA
LAMTOR1	1	0	0	down	NA	2.1902e-16	0.152909	0.505191	0.658101	0.220382	-0.12724	1.26449	1.13725	1_HSC	2_earlyLymphoid	NA
CPA3	1	0	0	down	NA	1.97073e-17	0.152737	0.834973	0.987709	NA	-1.31788	1.31788	0	1_HSC	2_earlyLymphoid	NA
PPT1	1	0	0	down	NA	1.02171e-18	0.152639	0.630601	0.78324	1	-0.0129857	1.10577	1.09278	1_HSC	2_earlyLymphoid	NA
IGSF10	1	0	0	down	NA	9.70057e-26	0.152482	0.786066	0.938547	NA	-0.0996169	1.09962	1	1_HSC	2_earlyLymphoid	NA
TUBA1C	1	0	0	down	NA	2.42209e-19	0.151421	0.701093	0.852514	0.452601	-0.280483	1.31079	1.0303	1_HSC	2_earlyLymphoid	NA
ANGPT1	1	0	0	down	NA	8.02582e-27	0.151151	0.826503	0.977654	NA	-1.06142	1.06142	0	1_HSC	2_earlyLymphoid	NA
PHPT1	1	0	0	down	NA	6.59545e-14	0.150052	0.577322	0.727374	1	-0.0390126	1.22754	1.18852	1_HSC	2_earlyLymphoid	NA
SERPINE2	1	0	0	down	NA	3.89422e-20	0.149744	0.738525	0.888268	1	-0.0456844	1.08568	1.04	1_HSC	2_earlyLymphoid	NA
PYGL	1	0	0	down	NA	5.31781e-24	0.14937	0.80929	0.958659	NA	-0.00735693	1.03438	1.02703	1_HSC	2_earlyLymphoid	NA
EIF4EBP1	1	0	0	down	NA	1.81041e-15	0.14918	0.65082	0.8	1	0.00427956	1.17449	1.17877	1_HSC	2_earlyLymphoid	NA
KRT18	1	0	0	down	NA	6.27475e-27	0.149023	0.806284	0.955307	NA	-0.0906559	1.11566	1.025	1_HSC	2_earlyLymphoid	NA
ASAH1	1	0	0	down	NA	9.6e-18	0.148185	0.656284	0.804469	1	-0.0511151	1.10254	1.05143	1_HSC	2_earlyLymphoid	NA
HEMGN	1	0	0	down	NA	1.15503e-30	0.147837	0.79071	0.938547	1	-0.0201519	1.12924	1.10909	1_HSC	2_earlyLymphoid	NA
NME4	1	0	0	down	NA	9.25482e-12	0.145986	0.495355	0.641341	0.723934	-0.111522	1.32648	1.21495	1_HSC	2_earlyLymphoid	NA
VKORC1	1	0	0	down	NA	9.15765e-18	0.145693	0.68224	0.827933	1	-0.0434054	1.10834	1.06494	1_HSC	2_earlyLymphoid	NA
LAPTM4A	1	0	0	down	NA	7.66748e-17	0.145265	0.363115	0.50838	1.07631e-09	-0.367679	1.62677	1.25909	1_HSC	2_earlyLymphoid	NA
AJ006998.2	1	0	0	down	NA	7.17419e-23	0.144964	0.837158	0.982123	NA	-1.06544	1.06544	0	1_HSC	2_earlyLymphoid	NA
TM7SF3	1	0	0	down	NA	1.62416e-18	0.144771	0.690984	0.835754	1	-0.0199751	1.12202	1.10204	1_HSC	2_earlyLymphoid	NA
HMGA1	1	0	0	down	NA	1.30265e-15	0.143134	0.21776	0.360894	1.97975e-05	-0.236279	2.08068	1.84441	1_HSC	2_earlyLymphoid	NA
IFI6	1	0	0	down	NA	2.85182e-20	0.142689	0.747814	0.890503	1	-0.0484556	1.20152	1.15306	1_HSC	2_earlyLymphoid	NA
IMPDH2	1	0	0	down	NA	4.69089e-14	0.142452	0.249727	0.392179	0.0294641	-0.086061	1.689	1.60294	1_HSC	2_earlyLymphoid	NA
FAM117A	1	0	0	down	NA	4.53627e-24	0.140011	0.803005	0.943017	1	-0.032716	1.09154	1.05882	1_HSC	2_earlyLymphoid	NA
JUN	1	0	0	down	NA	1.57145e-15	0.137687	0.311475	0.449162	0.00465249	-0.556917	3.62183	3.06491	1_HSC	2_earlyLymphoid	NA
NAALADL1	1	0	0	down	NA	2.10082e-21	0.137401	0.811202	0.948603	1	-0.0506198	1.07236	1.02174	1_HSC	2_earlyLymphoid	NA
PROM1	1	0	0	down	NA	2.69337e-22	0.137249	0.754372	0.89162	1	-0.0191278	1.05006	1.03093	1_HSC	2_earlyLymphoid	NA
ATP1B1	1	0	0	down	NA	3.58614e-25	0.136406	0.816667	0.953073	NA	-0.0745511	1.09836	1.02381	1_HSC	2_earlyLymphoid	NA
PPDPF	1	0	0	down	NA	1.2773e-15	0.135244	0.202186	0.33743	0.0149278	-1.62815	3.43759	1.80944	1_HSC	2_earlyLymphoid	NA
TAF1D	1	0	0	down	NA	2.71739e-13	0.13373	0.534426	0.668156	0.680451	-0.115652	1.33451	1.21886	1_HSC	2_earlyLymphoid	NA
CMBL	1	0	0	down	NA	1.48751e-22	0.133005	0.814481	0.947486	1	-0.0184878	1.03976	1.02128	1_HSC	2_earlyLymphoid	NA
FKBP4	1	0	0	down	NA	1.24971e-15	0.132953	0.687158	0.820112	1	0.042811	1.12489	1.1677	1_HSC	2_earlyLymphoid	NA
UROD	1	0	0	down	NA	2.72502e-16	0.132729	0.689617	0.822346	1	-0.050165	1.09419	1.04403	1_HSC	2_earlyLymphoid	NA
CPXM1	1	0	0	down	NA	2.76235e-20	0.131448	0.794809	0.926257	1	0.0264899	1.04927	1.07576	1_HSC	2_earlyLymphoid	NA
SLC40A1	1	0	0	down	NA	4.75458e-23	0.130619	0.820219	0.950838	NA	-0.0594087	1.10486	1.04545	1_HSC	2_earlyLymphoid	NA
NDUFC1	1	0	0	down	NA	7.41371e-14	0.129731	0.605464	0.735196	1	-0.0118576	1.14266	1.1308	1_HSC	2_earlyLymphoid	NA
ACSM3	1	0	0	down	NA	6.00883e-20	0.129117	0.853005	0.982123	NA	-1.07063	1.07063	0	1_HSC	2_earlyLymphoid	NA
PLEK	1	0	0	down	NA	6.35068e-16	0.129101	0.764754	0.893855	1	0.0174338	1.15099	1.16842	1_HSC	2_earlyLymphoid	NA
NPM3	1	0	0	down	NA	8.7373e-11	0.128974	0.571585	0.700559	1	-0.0521246	1.14541	1.09328	1_HSC	2_earlyLymphoid	NA
RP11-598F7.3	1	0	0	down	NA	2.49463e-14	0.12884	0.865574	0.994413	NA	-1.07114	1.07114	0	1_HSC	2_earlyLymphoid	NA
C19orf77	1	0	0	down	NA	3.21841e-11	0.128061	0.355738	0.483799	0.204594	-1.74647	3.37418	1.62771	1_HSC	2_earlyLymphoid	NA
NFKBIA	1	0	0	down	NA	3.385e-09	0.127648	0.599727	0.727374	1	-0.0356963	1.74061	1.70492	1_HSC	2_earlyLymphoid	NA
AMD1	1	0	0	down	NA	1.24168e-11	0.127162	0.503005	0.630168	0.181922	-0.128807	1.3282	1.1994	1_HSC	2_earlyLymphoid	NA
IDS	1	0	0	down	NA	7.28501e-16	0.126185	0.65929	0.785475	0.190963	-0.1597	1.30553	1.14583	1_HSC	2_earlyLymphoid	NA
ABHD14B	1	0	0	down	NA	1.78546e-13	0.125077	0.634699	0.759777	1	-0.0357169	1.14734	1.11163	1_HSC	2_earlyLymphoid	NA
C1orf21	1	0	0	down	NA	6.1022e-21	0.124842	0.79918	0.924022	1	-0.0345338	1.06395	1.02941	1_HSC	2_earlyLymphoid	NA
TAGLN2	1	0	0	down	NA	2.47832e-11	0.123668	0.284153	0.407821	1	0.0593691	1.75573	1.81509	1_HSC	2_earlyLymphoid	NA
DPP7	1	0	0	down	NA	5.72261e-10	0.123422	0.610656	0.734078	1	-0.0339054	1.13895	1.10504	1_HSC	2_earlyLymphoid	NA
RNASE2	1	0	0	down	NA	1.79273e-12	0.123351	0.869945	0.993296	NA	-1.48529	1.48529	0	1_HSC	2_earlyLymphoid	NA
TESPA1	1	0	0	down	NA	3.83622e-24	0.1229	0.812295	0.935196	1	-0.0310194	1.0655	1.03448	1_HSC	2_earlyLymphoid	NA
EPB41L4A-AS1	1	0	0	down	NA	1.02627e-10	0.122366	0.513388	0.635754	0.0962518	-0.146829	1.35542	1.20859	1_HSC	2_earlyLymphoid	NA
SERPING1	1	0	0	down	NA	1.17869e-21	0.121583	0.815847	0.93743	1	0.0164794	1.03709	1.05357	1_HSC	2_earlyLymphoid	NA
CD59	1	0	0	down	NA	1.00925e-12	0.121543	0.589071	0.710615	1	-0.0195284	1.14694	1.12741	1_HSC	2_earlyLymphoid	NA
CTSW	1	0	0	down	NA	8.89507e-12	0.121295	0.590437	0.711732	0.128228	0.218277	1.16544	1.38372	1_HSC	2_earlyLymphoid	NA
BEX4	1	0	0	down	NA	1.46512e-12	0.121202	0.57377	0.694972	1	-0.0405678	1.17244	1.13187	1_HSC	2_earlyLymphoid	NA
C9orf43	1	0	0	down	NA	1.0542e-20	0.121179	0.835246	0.956425	NA	-0.0182421	1.01824	1	1_HSC	2_earlyLymphoid	NA
EAF2	1	0	0	down	NA	3.80049e-12	0.1208	0.718306	0.839106	1	-0.0197893	1.08923	1.06944	1_HSC	2_earlyLymphoid	NA
NT5C3A	1	0	0	down	NA	2.12898e-16	0.120771	0.729508	0.850279	1	-0.0533695	1.07576	1.02239	1_HSC	2_earlyLymphoid	NA
FOSB	1	0	0	down	NA	3.21667e-12	0.120724	0.589891	0.710615	1	-0.185094	1.54031	1.35521	1_HSC	2_earlyLymphoid	NA
MGST3	1	0	0	down	NA	7.86046e-12	0.120345	0.672951	0.793296	1	-0.0104225	1.09691	1.08649	1_HSC	2_earlyLymphoid	NA
EIF4B	1	0	0	down	NA	6.57017e-11	0.11998	0.319126	0.439106	0.538749	-0.913363	2.29583	1.38247	1_HSC	2_earlyLymphoid	NA
TMEM205	1	0	0	down	NA	2.0259e-14	0.119878	0.727049	0.846927	1	-0.046879	1.07608	1.0292	1_HSC	2_earlyLymphoid	NA
CENPV	1	0	0	down	NA	4.20748e-17	0.119637	0.841257	0.960894	NA	-0.0110155	1.03959	1.02857	1_HSC	2_earlyLymphoid	NA
SNHG8	1	0	0	down	NA	1.85012e-15	0.119591	0.164208	0.283799	1.67172e-08	-0.452793	2.32331	1.87051	1_HSC	2_earlyLymphoid	NA
TSPO	1	0	0	down	NA	8.86156e-11	0.118662	0.460109	0.578771	1	-0.076417	1.38411	1.30769	1_HSC	2_earlyLymphoid	NA
BEX5	1	0	0	down	NA	2.66823e-18	0.11854	0.854645	0.973184	NA	-1.06015	1.06015	0	1_HSC	2_earlyLymphoid	NA
RCN1	1	0	0	down	NA	4.22552e-16	0.118361	0.734153	0.852514	1	-0.0309804	1.06886	1.03788	1_HSC	2_earlyLymphoid	NA
IL18	1	0	0	down	NA	9.4257e-17	0.116735	0.698907	0.815642	1	-0.0228455	1.10163	1.07879	1_HSC	2_earlyLymphoid	NA
FAH	1	0	0	down	NA	2.508e-16	0.116654	0.782787	0.899441	1	-0.0228512	1.03396	1.01111	1_HSC	2_earlyLymphoid	NA
PBX1	1	0	0	down	NA	1.90171e-20	0.11628	0.853552	0.969832	NA	-1.05784	1.05784	0	1_HSC	2_earlyLymphoid	NA
SPN	1	0	0	down	NA	2.05345e-11	0.116048	0.543169	0.659218	1	-0.0403875	1.22727	1.18689	1_HSC	2_earlyLymphoid	NA
CEBPB	1	0	0	down	NA	1.1558e-18	0.115656	0.863115	0.978771	NA	-1.10778	1.10778	0	1_HSC	2_earlyLymphoid	NA
CLDN10	1	0	0	down	NA	2.84733e-17	0.115461	0.854372	0.969832	NA	-1.05066	1.05066	0	1_HSC	2_earlyLymphoid	NA
FIS1	1	0	0	down	NA	3.87696e-09	0.114876	0.49071	0.605587	1	-0.0481146	1.26341	1.2153	1_HSC	2_earlyLymphoid	NA
HTR1F	1	0	0	down	NA	1.20368e-19	0.114704	0.820492	0.935196	1	-0.0527738	1.07002	1.01724	1_HSC	2_earlyLymphoid	NA
DUSP23	1	0	0	down	NA	1.93696e-16	0.114653	0.755738	0.870391	1	0.00507213	1.03803	1.0431	1_HSC	2_earlyLymphoid	NA
SPINT2	1	0	0	down	NA	4.11086e-11	0.114634	0.54235	0.656983	1	-0.053076	1.26806	1.21498	1_HSC	2_earlyLymphoid	NA
COMT	1	0	0	down	NA	7.06311e-09	0.11451	0.474317	0.588827	1	-0.0197788	1.24532	1.22554	1_HSC	2_earlyLymphoid	NA
ICA1	1	0	0	down	NA	1.46761e-19	0.114475	0.835246	0.949721	NA	-0.0165837	1.01658	1	1_HSC	2_earlyLymphoid	NA
C10orf11	1	0	0	down	NA	2.4444e-18	0.113573	0.857377	0.97095	NA	-1.0364	1.0364	0	1_HSC	2_earlyLymphoid	NA
CKS2	1	0	0	down	NA	5.19888e-11	0.113506	0.704372	0.817877	1	-0.235034	1.44362	1.20859	1_HSC	2_earlyLymphoid	NA
RHOC	1	0	0	down	NA	1.55199e-18	0.11342	0.800546	0.913966	1	-0.0110656	1.06301	1.05195	1_HSC	2_earlyLymphoid	NA
LYZ	1	0	0	down	NA	8.89678e-15	0.11302	0.80765	0.92067	1	-1.28399	2.43892	1.15493	1_HSC	2_earlyLymphoid	NA
LIMS1	1	0	0	down	NA	1.44765e-15	0.112777	0.65929	0.772067	1	-0.0068085	1.20289	1.19608	1_HSC	2_earlyLymphoid	NA
FSCN1	1	0	0	down	NA	1.14565e-17	0.112065	0.839891	0.951955	NA	-0.0290102	1.02901	1	1_HSC	2_earlyLymphoid	NA
SIL1	1	0	0	down	NA	1.69202e-17	0.112054	0.801913	0.913966	1	-0.0159785	1.02897	1.01299	1_HSC	2_earlyLymphoid	NA
FGFR1OP2	1	0	0	down	NA	8.93111e-16	0.111949	0.684699	0.796648	1	-0.0183595	1.12825	1.10989	1_HSC	2_earlyLymphoid	NA
TMEM14C	1	0	0	down	NA	1.53469e-08	0.111433	0.536612	0.648045	1	-0.00482555	1.20165	1.19683	1_HSC	2_earlyLymphoid	NA
CD63	1	0	0	down	NA	3.22223e-08	0.110631	0.488251	0.598883	1	0.0501794	1.27015	1.32033	1_HSC	2_earlyLymphoid	NA
NFIA	1	0	0	down	NA	2.89241e-17	0.110611	0.874863	0.985475	NA	-1.04148	1.04148	0	1_HSC	2_earlyLymphoid	NA
RBPMS	1	0	0	down	NA	1.43004e-19	0.110396	0.852732	0.963128	NA	-0.00680272	1.03711	1.0303	1_HSC	2_earlyLymphoid	NA
HSPA1A	1	0	0	down	NA	1.33186e-19	0.109503	0.850273	0.959777	NA	-0.167072	1.22263	1.05556	1_HSC	2_earlyLymphoid	NA
NBEAL1	1	0	0	down	NA	6.49321e-09	0.109279	0.652732	0.762011	1	-0.0320143	1.13061	1.09859	1_HSC	2_earlyLymphoid	NA
TPM1	1	0	0	down	NA	2.97885e-19	0.109079	0.856284	0.965363	NA	-0.00766589	1.03992	1.03226	1_HSC	2_earlyLymphoid	NA
HPGDS	1	0	0	down	NA	1.20521e-15	0.108128	0.87623	0.984358	NA	-1.08609	1.08609	0	1_HSC	2_earlyLymphoid	NA
NRIP1	1	0	0	down	NA	1.46008e-13	0.107777	0.685519	0.793296	1	0.0184188	1.18158	1.2	1_HSC	2_earlyLymphoid	NA
RP11-386I14.4	1	0	0	down	NA	5.1625e-08	0.10758	0.614208	0.721788	0.076637	-0.268806	1.71459	1.44578	1_HSC	2_earlyLymphoid	NA
FXN	1	0	0	down	NA	2.08155e-16	0.106878	0.832787	0.939665	NA	-0.0228758	1.02288	1	1_HSC	2_earlyLymphoid	NA
CST3	1	0	0	down	NA	5.59977e-10	0.10631	0.557377	0.663687	0.0600965	0.408447	1.50185	1.9103	1_HSC	2_earlyLymphoid	NA
C20orf27	1	0	0	down	NA	1.84143e-10	0.10627	0.730601	0.836872	1	-0.0397621	1.1288	1.08904	1_HSC	2_earlyLymphoid	NA
CCT4	1	0	0	down	NA	2.90763e-09	0.105828	0.385792	0.49162	1	-0.91416	2.29658	1.38242	1_HSC	2_earlyLymphoid	NA
C1orf186	1	0	0	down	NA	1.62778e-16	0.10562	0.876503	0.982123	NA	-1.09735	1.09735	0	1_HSC	2_earlyLymphoid	NA
NFKBIZ	1	0	0	down	NA	2.80323e-13	0.105139	0.767486	0.872626	1	-0.0233678	1.11986	1.09649	1_HSC	2_earlyLymphoid	NA
RTN3	1	0	0	down	NA	3.34646e-09	0.104282	0.604098	0.70838	1	-0.0679898	1.14079	1.0728	1_HSC	2_earlyLymphoid	NA
CAMLG	1	0	0	down	NA	5.15037e-08	0.104147	0.498087	0.602235	0.445367	-0.11895	1.33805	1.2191	1_HSC	2_earlyLymphoid	NA
PPA2	1	0	0	down	NA	4.69254e-09	0.104141	0.647814	0.751955	1	-0.054082	1.11715	1.06306	1_HSC	2_earlyLymphoid	NA
SSB	1	0	0	down	NA	1.03437e-08	0.103839	0.45929	0.563128	1	-0.0117875	1.33148	1.31969	1_HSC	2_earlyLymphoid	NA
CD151	1	0	0	down	NA	4.60207e-15	0.103581	0.885246	0.988827	NA	-1.02619	1.02619	0	1_HSC	2_earlyLymphoid	NA
RNF24	1	0	0	down	NA	2.78363e-18	0.103131	0.827596	0.930726	1	0.0552886	1.02536	1.08065	1_HSC	2_earlyLymphoid	NA
AK2	1	0	0	down	NA	1.77482e-08	0.102893	0.66694	0.769832	1	-0.0356053	1.11813	1.08252	1_HSC	2_earlyLymphoid	NA
SPARC	1	0	0	down	NA	4.97751e-13	0.10276	0.823497	0.926257	1	-0.011821	1.05728	1.04545	1_HSC	2_earlyLymphoid	NA
STOM	1	0	0	down	NA	6.71804e-14	0.102343	0.74235	0.844693	1	-0.00750704	1.04348	1.03597	1_HSC	2_earlyLymphoid	NA
TM4SF1	1	0	0	down	NA	1.9253e-09	0.101044	0.896721	0.997765	NA	-1.06614	1.06614	0	1_HSC	2_earlyLymphoid	NA
ISYNA1	1	0	0	down	NA	4.21671e-10	0.100782	0.734973	0.835754	1	-0.00517568	1.10722	1.10204	1_HSC	2_earlyLymphoid	NA
TPM4	1	0	0	up	NA	4.3952e-06	-0.100017	0.611749	0.511732	1	0.0271169	1.35046	1.37757	1_HSC	2_earlyLymphoid	NA
BUD31	1	0	0	up	NA	1.31153e-06	-0.100043	0.748087	0.648045	0.630932	0.0769893	1.09761	1.1746	1_HSC	2_earlyLymphoid	NA
LITAF	1	0	0	up	NA	2.03478e-09	-0.100133	0.856557	0.756425	1	0.0602184	1.05905	1.11927	1_HSC	2_earlyLymphoid	NA
ELMSAN1	1	0	0	up	NA	5.50433e-09	-0.100151	0.905738	0.805587	1	0.0744128	1.03478	1.1092	1_HSC	2_earlyLymphoid	NA
AFF3	1	0	0	up	NA	1.56867e-18	-0.100169	0.954918	0.854749	1	0.127972	1.01818	1.14615	1_HSC	2_earlyLymphoid	NA
UPF3A	1	0	0	up	NA	3.41687e-07	-0.100212	0.803005	0.702793	1	0.0452223	1.0638	1.10902	1_HSC	2_earlyLymphoid	NA
BCL2	1	0	0	up	NA	9.44922e-13	-0.100433	0.930601	0.830168	1	0.109304	1.03543	1.14474	1_HSC	2_earlyLymphoid	NA
CPNE3	1	0	0	up	NA	5.11602e-06	-0.100505	0.789891	0.689385	1	0.0109083	1.07542	1.08633	1_HSC	2_earlyLymphoid	NA
ADRBK1	1	0	0	up	NA	1.14532e-07	-0.100513	0.877049	0.776536	1	0.0705556	1.02444	1.095	1_HSC	2_earlyLymphoid	NA
SLMO2	1	0	0	up	NA	4.35705e-08	-0.100684	0.869399	0.768715	1	0.0687749	1.02301	1.09179	1_HSC	2_earlyLymphoid	NA
COX16	1	0	0	up	NA	7.50954e-07	-0.100704	0.656011	0.555307	1	0.0505127	1.12788	1.17839	1_HSC	2_earlyLymphoid	NA
SRP19	1	0	0	up	NA	1.1049e-07	-0.100763	0.815847	0.715084	1	0.0294699	1.04896	1.07843	1_HSC	2_earlyLymphoid	NA
NARF	1	0	0	up	NA	2.9692e-07	-0.100846	0.837158	0.736313	1	0.063019	1.0302	1.09322	1_HSC	2_earlyLymphoid	NA
PCM1	1	0	0	up	NA	2.85683e-06	-0.10114	0.761475	0.660335	1	0.0804131	1.09393	1.17434	1_HSC	2_earlyLymphoid	NA
ANKRD11	1	0	0	up	NA	1.43136e-08	-0.101152	0.860929	0.759777	1	0.0950701	1.04912	1.14419	1_HSC	2_earlyLymphoid	NA
RBM25	1	0	0	up	NA	8.51717e-06	-0.101186	0.684426	0.58324	1	0.103761	1.1697	1.27346	1_HSC	2_earlyLymphoid	NA
PSMB3	1	0	0	up	NA	1.62321e-06	-0.101374	0.588525	0.487151	0.287461	0.123194	1.22975	1.35294	1_HSC	2_earlyLymphoid	NA
TBCC	1	0	0	up	NA	2.59236e-07	-0.10147	0.846721	0.745251	0.980602	0.104982	1.01783	1.12281	1_HSC	2_earlyLymphoid	NA
NDUFA1	1	0	0	up	NA	2.80518e-06	-0.101674	0.462568	0.360894	0.0124125	0.167514	1.33249	1.5	1_HSC	2_earlyLymphoid	NA
PNN	1	0	0	up	NA	1.45566e-06	-0.101742	0.509563	0.407821	1	0.126257	1.35487	1.48113	1_HSC	2_earlyLymphoid	NA
LGALS3BP	1	0	0	up	NA	5.35309e-10	-0.102059	0.895355	0.793296	1	0.0314727	1.04961	1.08108	1_HSC	2_earlyLymphoid	NA
PNISR	1	0	0	up	NA	2.25698e-05	-0.102175	0.340164	0.237989	5.32123e-05	0.321273	1.78137	2.10264	1_HSC	2_earlyLymphoid	NA
C1orf63	1	0	0	up	NA	7.88505e-06	-0.102233	0.762568	0.660335	0.0284661	0.161741	1.12773	1.28947	1_HSC	2_earlyLymphoid	NA
CCDC107	1	0	0	up	NA	7.83907e-14	-0.102302	0.946995	0.844693	1	0.0380108	1.00515	1.04317	1_HSC	2_earlyLymphoid	NA
SFXN1	1	0	0	up	NA	1.64678e-09	-0.102396	0.86776	0.765363	1	0.144392	1.04132	1.18571	1_HSC	2_earlyLymphoid	NA
ZMIZ1	1	0	0	up	NA	6.61196e-10	-0.102557	0.898087	0.795531	1	0.0520664	1.00804	1.06011	1_HSC	2_earlyLymphoid	NA
SPCS1	1	0	0	up	NA	2.07239e-06	-0.102717	0.528415	0.425698	0.00258999	0.176617	1.28447	1.46109	1_HSC	2_earlyLymphoid	NA
C12orf23	1	0	0	up	NA	3.89531e-10	-0.102883	0.90847	0.805587	1	0.0367988	1.01493	1.05172	1_HSC	2_earlyLymphoid	NA
CD3E	1	0	0	up	NA	7.05957e-29	-0.102984	0.978962	0.875978	1	0.0842401	1.07792	1.16216	1_HSC	2_earlyLymphoid	NA
HIF1A	1	0	0	up	NA	1.16655e-08	-0.103207	0.843989	0.740782	0.490378	0.150855	1.05604	1.2069	1_HSC	2_earlyLymphoid	NA
COX8A	1	0	0	up	NA	8.824e-07	-0.103527	0.504645	0.401117	0.895763	0.10235	1.41258	1.51493	1_HSC	2_earlyLymphoid	NA
CBFA2T3	1	0	0	up	NA	6.93095e-08	-0.103747	0.894809	0.791061	1	0.0488923	1.02597	1.07487	1_HSC	2_earlyLymphoid	NA
COPZ1	1	0	0	up	NA	5.38385e-07	-0.10392	0.82459	0.72067	1	0.0559626	1.02804	1.084	1_HSC	2_earlyLymphoid	NA
RBM17	1	0	0	up	NA	4.68857e-08	-0.104146	0.764481	0.660335	0.945754	0.0983637	1.08585	1.18421	1_HSC	2_earlyLymphoid	NA
NAA10	1	0	0	up	NA	3.16695e-09	-0.104501	0.786066	0.681564	1	0.0930698	1.07535	1.16842	1_HSC	2_earlyLymphoid	NA
PKIG	1	0	0	up	NA	1.36693e-11	-0.104601	0.919126	0.814525	1	0.0674455	1.01689	1.08434	1_HSC	2_earlyLymphoid	NA
ACTR2	1	0	0	up	NA	5.86587e-07	-0.104659	0.74153	0.636872	0.124315	0.110262	1.12051	1.23077	1_HSC	2_earlyLymphoid	NA
HCLS1	1	0	0	up	NA	3.09741e-07	-0.104759	0.812022	0.707263	0.835208	0.0912591	1.05378	1.14504	1_HSC	2_earlyLymphoid	NA
NDUFS7	1	0	0	up	NA	1.44086e-07	-0.105016	0.700546	0.595531	1	0.0386438	1.09672	1.13536	1_HSC	2_earlyLymphoid	NA
WTAP	1	0	0	up	NA	1.76627e-06	-0.105107	0.746448	0.641341	0.105841	0.150006	1.15841	1.30841	1_HSC	2_earlyLymphoid	NA
SREK1	1	0	0	up	NA	1.67e-08	-0.105145	0.78224	0.677095	0.619685	0.098375	1.08156	1.17993	1_HSC	2_earlyLymphoid	NA
PCSK7	1	0	0	up	NA	3.15048e-11	-0.105338	0.898634	0.793296	1	0.0892548	1.02426	1.11351	1_HSC	2_earlyLymphoid	NA
TOP1	1	0	0	up	NA	2.29831e-07	-0.105779	0.816393	0.710615	0.92463	0.114784	1.0744	1.18919	1_HSC	2_earlyLymphoid	NA
VAMP2	1	0	0	up	NA	9.92225e-05	-0.105883	0.561749	0.455866	0.429701	0.162275	1.35723	1.51951	1_HSC	2_earlyLymphoid	NA
ENG	1	0	0	up	NA	3.86028e-12	-0.105967	0.920492	0.814525	1	0.110173	1.01031	1.12048	1_HSC	2_earlyLymphoid	NA
ETS2	1	0	0	up	NA	2.14062e-05	-0.106022	0.668033	0.562011	1.02298e-05	0.296622	1.22634	1.52296	1_HSC	2_earlyLymphoid	NA
MYO1G	1	0	0	up	NA	1.53026e-08	-0.106075	0.878142	0.772067	1	0.0653961	1.01794	1.08333	1_HSC	2_earlyLymphoid	NA
TESC	1	0	0	up	NA	1.02682e-19	-0.106151	0.949727	0.843575	1	0.10823	1.04891	1.15714	1_HSC	2_earlyLymphoid	NA
P2RY14	1	0	0	up	NA	5.77883e-28	-0.106219	0.996721	0.890503	NA	1.12245	0	1.12245	1_HSC	2_earlyLymphoid	NA
REPIN1	1	0	0	up	NA	4.77122e-08	-0.106319	0.867213	0.760894	1	0.0698819	1.03292	1.1028	1_HSC	2_earlyLymphoid	NA
CDC42	1	0	0	up	NA	1.13286e-06	-0.106617	0.466393	0.359777	0.0148476	0.268458	1.66871	1.93717	1_HSC	2_earlyLymphoid	NA
PPM1K	1	0	0	up	NA	2.08787e-13	-0.106713	0.92459	0.817877	1	0.105695	1.01087	1.11656	1_HSC	2_earlyLymphoid	NA
TSPAN14	1	0	0	up	NA	6.06464e-23	-0.106756	0.972678	0.865922	1	0.03	1.02	1.05	1_HSC	2_earlyLymphoid	NA
ATP5G3	1	0	0	up	NA	1.77467e-09	-0.106831	0.306831	0.2	0.000207688	0.271037	1.7974	2.06844	1_HSC	2_earlyLymphoid	NA
ERAP2	1	0	0	up	NA	2.05927e-09	-0.107597	0.897541	0.789944	1	0.0504823	1.01867	1.06915	1_HSC	2_earlyLymphoid	NA
AIMP1	1	0	0	up	NA	3.65979e-07	-0.107617	0.684153	0.576536	0.667946	0.0936516	1.13062	1.22427	1_HSC	2_earlyLymphoid	NA
MAPKAPK2	1	0	0	up	NA	1.93848e-15	-0.107659	0.93224	0.824581	NA	0.171975	1	1.17197	1_HSC	2_earlyLymphoid	NA
SF1	1	0	0	up	NA	5.32324e-07	-0.107855	0.523497	0.415642	2.21312e-07	0.283679	1.32053	1.60421	1_HSC	2_earlyLymphoid	NA
TTC7A	1	0	0	up	NA	7.12781e-27	-0.108098	0.975137	0.867039	1	0.0394312	1.01099	1.05042	1_HSC	2_earlyLymphoid	NA
NKG7	1	0	0	up	NA	4.71452e-12	-0.108359	0.875956	0.767598	1	0.137644	1.05947	1.19712	1_HSC	2_earlyLymphoid	NA
SMARCA4	1	0	0	up	NA	4.4804e-11	-0.108823	0.855191	0.746369	1	0.0220514	1.03962	1.06167	1_HSC	2_earlyLymphoid	NA
SUMO1	1	0	0	up	NA	3.48672e-07	-0.109285	0.496995	0.387709	0.00157126	0.146316	1.25149	1.39781	1_HSC	2_earlyLymphoid	NA
STRAP	1	0	0	up	NA	2.86486e-08	-0.109555	0.622404	0.512849	0.0444159	0.134362	1.13169	1.26606	1_HSC	2_earlyLymphoid	NA
ATP6V1H	1	0	0	up	NA	4.12939e-08	-0.109564	0.846995	0.73743	1	0.0594225	1.02143	1.08085	1_HSC	2_earlyLymphoid	NA
MIDN	1	0	0	up	NA	1.88117e-13	-0.109714	0.915301	0.805587	1	0.0967	1.03548	1.13218	1_HSC	2_earlyLymphoid	NA
MPC1	1	0	0	up	NA	6.97869e-11	-0.109715	0.852732	0.743017	1	0.0815036	1.03154	1.11304	1_HSC	2_earlyLymphoid	NA
DBNL	1	0	0	up	NA	4.75677e-11	-0.109969	0.866393	0.756425	1	0.0130954	1.05112	1.06422	1_HSC	2_earlyLymphoid	NA
CD22	1	0	0	up	NA	2.12022e-32	-0.110215	0.992896	0.882682	NA	1.13333	0	1.13333	1_HSC	2_earlyLymphoid	NA
UBE2L6	1	0	0	up	NA	1.54753e-06	-0.110466	0.669126	0.558659	0.211532	0.100517	1.11974	1.22025	1_HSC	2_earlyLymphoid	NA
MAP1A	1	0	0	up	NA	5.92703e-09	-0.1105	0.892623	0.782123	1	0.0515169	1.03053	1.08205	1_HSC	2_earlyLymphoid	NA
CMPK1	1	0	0	up	NA	5.89407e-07	-0.11056	0.652459	0.541899	1	0.031458	1.18318	1.21463	1_HSC	2_earlyLymphoid	NA
ATP5F1	1	0	0	up	NA	1.49074e-07	-0.111017	0.481967	0.37095	0.0280092	0.164561	1.31857	1.48313	1_HSC	2_earlyLymphoid	NA
CD97	1	0	0	up	NA	6.7867e-13	-0.111031	0.918852	0.807821	1	0.0569063	1.0303	1.08721	1_HSC	2_earlyLymphoid	NA
FAM134B	1	0	0	up	NA	4.82939e-23	-0.111323	0.968306	0.856983	NA	0.0625	1	1.0625	1_HSC	2_earlyLymphoid	NA
ANP32A	1	0	0	up	NA	4.25215e-08	-0.112552	0.60082	0.488268	0.7569	0.115259	1.23409	1.34934	1_HSC	2_earlyLymphoid	NA
S1PR4	1	0	0	up	NA	9.10928e-13	-0.112695	0.919399	0.806704	0.653791	0.12995	1.02034	1.15029	1_HSC	2_earlyLymphoid	NA
SPNS3	1	0	0	up	NA	2.38748e-09	-0.112996	0.793443	0.680447	0.00154455	0.19413	1.14153	1.33566	1_HSC	2_earlyLymphoid	NA
PPIB	1	0	0	up	NA	6.97878e-08	-0.113374	0.476503	0.363128	0.149527	0.182467	1.6263	1.80877	1_HSC	2_earlyLymphoid	NA
POLR2J3	1	0	0	up	NA	3.1158e-11	-0.113448	0.873224	0.759777	1	0.0538893	1.03448	1.08837	1_HSC	2_earlyLymphoid	NA
DDX5	1	0	0	up	NA	2.00849e-10	-0.11358	0.229781	0.116201	0	0.851497	1.96772	2.81922	1_HSC	2_earlyLymphoid	NA
ARRDC2	1	0	0	up	NA	2.70917e-13	-0.113812	0.919399	0.805587	1	0.123339	1.02034	1.14368	1_HSC	2_earlyLymphoid	NA
CLK1	1	0	0	up	NA	1.18131e-11	-0.114063	0.858197	0.744134	1	0.104921	1.08285	1.18777	1_HSC	2_earlyLymphoid	NA
UBE2N	1	0	0	up	NA	4.06321e-08	-0.114076	0.695082	0.581006	1	0.0835771	1.10842	1.192	1_HSC	2_earlyLymphoid	NA
SIVA1	1	0	0	up	NA	4.21114e-10	-0.114302	0.634973	0.52067	0.0776193	0.174755	1.26347	1.43823	1_HSC	2_earlyLymphoid	NA
C6orf62	1	0	0	up	NA	2.24401e-07	-0.114366	0.807104	0.692737	0.0032493	0.171208	1.06516	1.23636	1_HSC	2_earlyLymphoid	NA
HMGN3	1	0	0	up	NA	5.96824e-08	-0.114394	0.480874	0.36648	8.75552e-06	0.201714	1.35737	1.55908	1_HSC	2_earlyLymphoid	NA
ZNF428	1	0	0	up	NA	1.37785e-08	-0.114444	0.61612	0.501676	0.0652085	0.114289	1.14804	1.26233	1_HSC	2_earlyLymphoid	NA
PSMB8	1	0	0	up	NA	5.19471e-08	-0.114464	0.602732	0.488268	0.00343698	0.149361	1.21527	1.36463	1_HSC	2_earlyLymphoid	NA
PSMA2-1	1	0	0	up	NA	7.16925e-07	-0.114548	0.561475	0.446927	0.00388513	0.168659	1.24548	1.41414	1_HSC	2_earlyLymphoid	NA
PRRC2C	1	0	0	up	NA	2.70607e-08	-0.114902	0.645628	0.530726	0.0304743	0.163915	1.17656	1.34048	1_HSC	2_earlyLymphoid	NA
RP1-244F24.1	1	0	0	up	NA	8.09579e-33	-0.115177	0.983333	0.868156	1	0.229369	1.01639	1.24576	1_HSC	2_earlyLymphoid	NA
ABI1	1	0	0	up	NA	9.12028e-09	-0.11522	0.831421	0.716201	1	0.0183068	1.04862	1.06693	1_HSC	2_earlyLymphoid	NA
NDUFA2	1	0	0	up	NA	4.61237e-08	-0.115235	0.605738	0.490503	0.705223	0.0858546	1.19265	1.27851	1_HSC	2_earlyLymphoid	NA
MAZ	1	0	0	up	NA	6.29693e-11	-0.115844	0.840984	0.72514	1	0.0847791	1.04124	1.12602	1_HSC	2_earlyLymphoid	NA
HPS4	1	0	0	up	NA	1.51516e-12	-0.115931	0.87459	0.758659	0.118498	0.1939	1.02832	1.22222	1_HSC	2_earlyLymphoid	NA
C19orf43	1	0	0	up	NA	1.40456e-07	-0.116077	0.468033	0.351955	7.83149e-05	0.185119	1.33385	1.51897	1_HSC	2_earlyLymphoid	NA
SUN2	1	0	0	up	NA	1.02013e-09	-0.116126	0.865847	0.749721	1	0.0863035	1.0387	1.125	1_HSC	2_earlyLymphoid	NA
CFL1	1	1	0	up	up	2.89189e-16	-0.116236	0.160929	0.0446927	0	1.06514	2.98632	4.05146	1_HSC	2_earlyLymphoid	NA
PSMB4	1	0	0	up	NA	2.28128e-08	-0.116436	0.764481	0.648045	0.100342	0.125268	1.05568	1.18095	1_HSC	2_earlyLymphoid	NA
UGP2	1	0	0	up	NA	2.06508e-08	-0.116612	0.769126	0.652514	0.034056	0.138511	1.07692	1.21543	1_HSC	2_earlyLymphoid	NA
COX6A1	1	0	0	up	NA	3.7394e-08	-0.116687	0.503279	0.386592	0.0213289	0.197416	1.31078	1.5082	1_HSC	2_earlyLymphoid	NA
CALCOCO2	1	0	0	up	NA	7.61449e-10	-0.116708	0.827322	0.710615	1	0.0465886	1.0538	1.10039	1_HSC	2_earlyLymphoid	NA
ARPC4	1	0	0	up	NA	1.32389e-09	-0.116725	0.739071	0.622346	0.120166	0.136662	1.1089	1.24556	1_HSC	2_earlyLymphoid	NA
PAK2	1	0	0	up	NA	1.34858e-09	-0.117343	0.798907	0.681564	1	0.0532895	1.0625	1.11579	1_HSC	2_earlyLymphoid	NA
SSH2	1	0	0	up	NA	5.20254e-18	-0.117613	0.924317	0.806704	1	0.127898	1.01083	1.13873	1_HSC	2_earlyLymphoid	NA
ID2	1	0	0	up	NA	4.52708e-12	-0.117776	0.829508	0.711732	0.0391084	0.811606	1.40545	2.21705	1_HSC	2_earlyLymphoid	NA
ODC1	1	0	0	up	NA	1.31304e-12	-0.117865	0.800546	0.682682	0.41891	0.125159	1.09315	1.21831	1_HSC	2_earlyLymphoid	NA
ROCK1	1	0	0	up	NA	4.70558e-09	-0.118027	0.768306	0.650279	1	0.0933224	1.09198	1.1853	1_HSC	2_earlyLymphoid	NA
TMED10	1	0	0	up	NA	7.30997e-09	-0.118088	0.665574	0.547486	0.00201353	0.157462	1.14624	1.3037	1_HSC	2_earlyLymphoid	NA
POLR2G	1	0	0	up	NA	2.69434e-09	-0.118608	0.729781	0.611173	0.854463	0.0912567	1.10415	1.1954	1_HSC	2_earlyLymphoid	NA
RGS1	1	0	0	up	NA	7.10026e-20	-0.119062	0.946995	0.827933	1	0.230017	1.18557	1.41558	1_HSC	2_earlyLymphoid	NA
RBM38	1	0	0	up	NA	7.61747e-37	-0.1191	0.982787	0.863687	1	0.0742909	1.01587	1.09016	1_HSC	2_earlyLymphoid	NA
SMIM14	1	0	0	up	NA	3.87091e-23	-0.119139	0.956011	0.836872	1	0.051774	1.03727	1.08904	1_HSC	2_earlyLymphoid	NA
YWHAB	1	0	0	up	NA	2.86038e-08	-0.119199	0.515847	0.396648	0.0250939	0.178493	1.38262	1.56111	1_HSC	2_earlyLymphoid	NA
TERF2IP	1	0	0	up	NA	2.85578e-08	-0.120067	0.714481	0.594413	1	0.0820647	1.10526	1.18733	1_HSC	2_earlyLymphoid	NA
ARHGAP4	1	0	0	up	NA	9.14664e-12	-0.120738	0.846995	0.726257	0.980602	0.0941327	1.04464	1.13878	1_HSC	2_earlyLymphoid	NA
EMB	1	0	0	up	NA	1.52917e-11	-0.120944	0.800273	0.67933	1	0.0740954	1.08618	1.16028	1_HSC	2_earlyLymphoid	NA
TLE4	1	0	0	up	NA	6.33452e-12	-0.121133	0.841803	0.72067	0.000720605	0.219371	1.08463	1.304	1_HSC	2_earlyLymphoid	NA
TRIM22	1	0	0	up	NA	4.29549e-11	-0.121249	0.886612	0.765363	1	0.0878371	1.02169	1.10952	1_HSC	2_earlyLymphoid	NA
TP53INP1	1	0	0	up	NA	8.07351e-35	-0.121432	0.978415	0.856983	1	0.162184	1.02532	1.1875	1_HSC	2_earlyLymphoid	NA
LUC7L3	1	0	0	up	NA	1.44042e-06	-0.121569	0.547268	0.425698	0.137315	0.148151	1.33434	1.48249	1_HSC	2_earlyLymphoid	NA
PSMB10	1	0	0	up	NA	1.15995e-09	-0.121866	0.809016	0.687151	0.0234023	0.142075	1.04721	1.18929	1_HSC	2_earlyLymphoid	NA
HLA-DPB1	1	0	0	up	NA	2.02934e-09	-0.122247	0.36694	0.244693	1.46678e-09	0.78229	2.22659	3.00888	1_HSC	2_earlyLymphoid	NA
SLC9A3R1	1	0	0	up	NA	1.04492e-09	-0.122777	0.855738	0.732961	1	0.104777	1.04167	1.14644	1_HSC	2_earlyLymphoid	NA
SDK2	1	0	0	up	NA	3.36361e-28	-0.122916	0.962022	0.839106	NA	0.0416667	1	1.04167	1_HSC	2_earlyLymphoid	NA
NGLY1	1	0	0	up	NA	1.53906e-11	-0.123094	0.84153	0.718436	0.565402	0.13098	1.03966	1.17063	1_HSC	2_earlyLymphoid	NA
SYK	1	0	0	up	NA	3.72531e-14	-0.123361	0.892077	0.768715	1	0.0811961	1.02025	1.10145	1_HSC	2_earlyLymphoid	NA
KTN1	1	0	0	up	NA	4.25435e-09	-0.123529	0.609563	0.486034	0.0047557	0.14986	1.20014	1.35	1_HSC	2_earlyLymphoid	NA
DDX17	1	0	0	up	NA	1.73457e-07	-0.123874	0.669126	0.545251	0.4373	0.123183	1.15937	1.28256	1_HSC	2_earlyLymphoid	NA
SCAF11	1	0	0	up	NA	1.32216e-09	-0.124068	0.722951	0.598883	1	0.0552928	1.13412	1.18942	1_HSC	2_earlyLymphoid	NA
FBXW7	1	0	0	up	NA	1.02151e-25	-0.124306	0.962295	0.837989	0.298048	0.233783	1.01449	1.24828	1_HSC	2_earlyLymphoid	NA
LCK	1	0	0	up	NA	1.05676e-36	-0.12434	0.985792	0.861453	1	0.0179901	1.03846	1.05645	1_HSC	2_earlyLymphoid	NA
MSI2	1	0	0	up	NA	3.25077e-08	-0.124912	0.522678	0.397765	2.79916e-09	0.365038	1.32513	1.69017	1_HSC	2_earlyLymphoid	NA
NCF1	1	0	0	up	NA	1.64226e-36	-0.125306	0.980055	0.854749	0.980602	0.232455	1.0137	1.24615	1_HSC	2_earlyLymphoid	NA
UBASH3B	1	0	0	up	NA	1.32712e-32	-0.125926	0.977322	0.851397	NA	0.0902256	1	1.09023	1_HSC	2_earlyLymphoid	NA
TRA2A	1	0	0	up	NA	2.22233e-11	-0.126272	0.774317	0.648045	0.0316596	0.183508	1.15617	1.33968	1_HSC	2_earlyLymphoid	NA
LY96	1	0	0	up	NA	7.6027e-32	-0.126545	0.97459	0.848045	NA	0.0955882	1	1.09559	1_HSC	2_earlyLymphoid	NA
FLT3	1	0	0	up	NA	6.1858e-09	-0.126868	0.772678	0.64581	0.168947	0.105132	1.13462	1.23975	1_HSC	2_earlyLymphoid	NA
GABARAPL2	1	0	0	up	NA	1.0424e-07	-0.127553	0.679508	0.551955	0.782111	0.123825	1.16795	1.29177	1_HSC	2_earlyLymphoid	NA
SGSM3	1	0	0	up	NA	1.76541e-18	-0.127996	0.934699	0.806704	1	0.0320942	1.00837	1.04046	1_HSC	2_earlyLymphoid	NA
ARGLU1	1	0	0	up	NA	2.10649e-08	-0.128102	0.554918	0.426816	0.0869891	0.149419	1.31062	1.46004	1_HSC	2_earlyLymphoid	NA
BCAS4	1	0	0	up	NA	5.23485e-16	-0.128162	0.914754	0.786592	1	0.056954	1.03205	1.08901	1_HSC	2_earlyLymphoid	NA
NASP	1	0	0	up	NA	1.17955e-10	-0.128191	0.525956	0.397765	0.243932	0.199649	1.64265	1.8423	1_HSC	2_earlyLymphoid	NA
PLD4	1	0	0	up	NA	5.11345e-19	-0.128602	0.895082	0.76648	1.98888e-05	0.368309	1.14844	1.51675	1_HSC	2_earlyLymphoid	NA
ARRDC3	1	0	0	up	NA	7.10841e-09	-0.128673	0.754372	0.625698	1	0.0842462	1.16352	1.24776	1_HSC	2_earlyLymphoid	NA
LCN6-1	1	0	0	up	NA	1.29602e-10	-0.129336	0.999727	0.870391	NA	1.28448	0	1.28448	1_HSC	2_earlyLymphoid	NA
RCN2	1	0	0	up	NA	7.62869e-11	-0.129557	0.727322	0.597765	0.979743	0.0773102	1.06713	1.14444	1_HSC	2_earlyLymphoid	NA
MAP1LC3B	1	0	0	up	NA	1.75115e-13	-0.129774	0.842623	0.712849	0.157354	0.143726	1.0625	1.20623	1_HSC	2_earlyLymphoid	NA
MYL6B	1	0	0	up	NA	1.00818e-10	-0.129797	0.704098	0.574302	0.00136668	0.156179	1.07479	1.23097	1_HSC	2_earlyLymphoid	NA
A1BG	1	0	0	up	NA	2.80562e-13	-0.129925	0.848361	0.718436	1	0.0790648	1.05586	1.13492	1_HSC	2_earlyLymphoid	NA
REEP5	1	0	0	up	NA	1.00607e-20	-0.130079	0.928962	0.798883	1	0.0363248	1.01923	1.05556	1_HSC	2_earlyLymphoid	NA
TYROBP	1	0	0	up	NA	2.56098e-16	-0.130227	0.859836	0.729609	5.33002e-10	0.51379	1.12671	1.6405	1_HSC	2_earlyLymphoid	NA
LGALS1	1	1	0	up	up	2.61718e-14	-0.130639	0.766393	0.635754	0	4.02998	3.29825	7.32822	1_HSC	2_earlyLymphoid	NA
FOXP1	1	0	0	up	NA	1.29602e-10	-0.13103	0.748907	0.617877	0.0621272	0.14624	1.19587	1.34211	1_HSC	2_earlyLymphoid	NA
N4BP2	1	0	0	up	NA	5.81548e-17	-0.131358	0.896721	0.765363	1	0.0550265	1.04497	1.1	1_HSC	2_earlyLymphoid	NA
RGS19	1	0	0	up	NA	5.92978e-16	-0.131456	0.89235	0.760894	1	0.0961146	1.02538	1.1215	1_HSC	2_earlyLymphoid	NA
SH3BGRL3	1	0	0	up	NA	1.6467e-12	-0.132718	0.348361	0.215642	2.54233e-14	0.554943	1.70147	2.25641	1_HSC	2_earlyLymphoid	NA
PIK3AP1	1	0	0	up	NA	7.9447e-34	-0.132776	0.970765	0.837989	1	0.0320335	1.00935	1.04138	1_HSC	2_earlyLymphoid	NA
PIK3R1	1	0	0	up	NA	1.22832e-13	-0.133104	0.718579	0.585475	0.00132458	0.191513	1.14272	1.33423	1_HSC	2_earlyLymphoid	NA
HLA-DRB1	1	0	0	up	NA	8.22716e-09	-0.133361	0.407104	0.273743	4.04561e-05	0.414548	2.25622	2.67077	1_HSC	2_earlyLymphoid	NA
ODF2L	1	0	0	up	NA	1.13021e-12	-0.13373	0.865574	0.731844	1	0.0942073	1.01829	1.1125	1_HSC	2_earlyLymphoid	NA
MOB1A	1	0	0	up	NA	1.31414e-15	-0.133799	0.85	0.716201	0.685474	0.0995439	1.03825	1.1378	1_HSC	2_earlyLymphoid	NA
TBCD	1	0	0	up	NA	3.03134e-27	-0.134162	0.958743	0.824581	1	0.0631881	1.01325	1.07643	1_HSC	2_earlyLymphoid	NA
MAN1A1	1	0	0	up	NA	1.24201e-16	-0.134266	0.904098	0.769832	1	0.135397	1.01994	1.15534	1_HSC	2_earlyLymphoid	NA
MLXIP	1	0	0	up	NA	6.57524e-19	-0.134408	0.885246	0.750838	0.181983	0.168183	1.0381	1.20628	1_HSC	2_earlyLymphoid	NA
DDAH2	1	0	0	up	NA	4.15619e-09	-0.135124	0.54071	0.405587	1.94126e-06	0.323806	1.36228	1.68609	1_HSC	2_earlyLymphoid	NA
CCDC69	1	0	0	up	NA	1.23806e-24	-0.135246	0.935246	0.8	1	0.142163	1.04219	1.18436	1_HSC	2_earlyLymphoid	NA
PSMA5	1	0	0	up	NA	7.43594e-12	-0.135486	0.712022	0.576536	0.0509646	0.125422	1.12524	1.25066	1_HSC	2_earlyLymphoid	NA
SMARCE1	1	0	0	up	NA	3.96167e-12	-0.135666	0.728962	0.593296	1	0.0915788	1.11996	1.21154	1_HSC	2_earlyLymphoid	NA
CPNE1	1	0	0	up	NA	9.84206e-11	-0.135806	0.772678	0.636872	0.139907	0.130048	1.08534	1.21538	1_HSC	2_earlyLymphoid	NA
TTC3	1	0	0	up	NA	9.34093e-12	-0.135928	0.567213	0.431285	0.00268893	0.182927	1.26894	1.45187	1_HSC	2_earlyLymphoid	NA
SMARCB1	1	0	0	up	NA	9.35803e-13	-0.136675	0.771311	0.634637	0.166971	0.11338	1.06093	1.17431	1_HSC	2_earlyLymphoid	NA
DSTN	1	0	0	up	NA	8.7712e-12	-0.136795	0.628415	0.49162	1.45781e-08	0.263914	1.15147	1.41538	1_HSC	2_earlyLymphoid	NA
SNRNP70	1	0	0	up	NA	1.37378e-11	-0.137549	0.719672	0.582123	0.182661	0.139001	1.11501	1.25401	1_HSC	2_earlyLymphoid	NA
ZNF207	1	0	0	up	NA	2.8642e-11	-0.137653	0.665027	0.527374	0.95641	0.0968457	1.14192	1.23877	1_HSC	2_earlyLymphoid	NA
BLOC1S1	1	0	0	up	NA	4.04677e-14	-0.138969	0.731148	0.592179	0.0673945	0.141461	1.12703	1.26849	1_HSC	2_earlyLymphoid	NA
ATP5J2	1	0	0	up	NA	1.48411e-12	-0.140114	0.404918	0.264804	0.00377441	-0.730036	2.38961	1.65957	1_HSC	2_earlyLymphoid	NA
SSBP2	1	0	0	up	NA	2.57048e-12	-0.140158	0.790437	0.650279	0.00339557	0.204427	1.09909	1.30351	1_HSC	2_earlyLymphoid	NA
TCEB1	1	0	0	up	NA	8.7712e-12	-0.140179	0.714481	0.574302	1	0.0601464	1.08421	1.14436	1_HSC	2_earlyLymphoid	NA
FHIT	1	0	0	up	NA	3.77328e-17	-0.140658	0.868033	0.727374	0.0011286	0.227311	1.01449	1.2418	1_HSC	2_earlyLymphoid	NA
RBM39	1	0	0	up	NA	2.13304e-10	-0.14073	0.527322	0.386592	0.00623459	0.224262	1.42601	1.65027	1_HSC	2_earlyLymphoid	NA
HSPA8	1	0	0	up	NA	1.33882e-11	-0.140865	0.421311	0.280447	5.85476e-09	0.579027	1.89613	2.47516	1_HSC	2_earlyLymphoid	NA
NDUFB4	1	0	0	up	NA	3.81996e-10	-0.141594	0.513661	0.372067	0.00189096	0.177892	1.26517	1.44306	1_HSC	2_earlyLymphoid	NA
EPC1	1	0	0	up	NA	9.34126e-15	-0.141657	0.748361	0.606704	0.0915419	0.138091	1.13464	1.27273	1_HSC	2_earlyLymphoid	NA
GNG2	1	0	0	up	NA	2.67351e-30	-0.143325	0.961202	0.817877	1	0.0656701	1.01408	1.07975	1_HSC	2_earlyLymphoid	NA
FUS	1	0	0	up	NA	2.97171e-13	-0.14343	0.443989	0.300559	7.0418e-11	0.494979	1.57052	2.0655	1_HSC	2_earlyLymphoid	NA
AES	1	0	0	up	NA	4.44246e-17	-0.143582	0.849727	0.706145	0.0087144	0.18533	1.06182	1.24715	1_HSC	2_earlyLymphoid	NA
SCPEP1	1	0	0	up	NA	2.75418e-34	-0.143969	0.957377	0.813408	1	0.147589	1.03205	1.17964	1_HSC	2_earlyLymphoid	NA
ARPC5L	1	0	0	up	NA	5.54397e-19	-0.143997	0.831148	0.687151	0.324508	0.107039	1.06796	1.175	1_HSC	2_earlyLymphoid	NA
CSRNP1	1	0	0	up	NA	1.55084e-25	-0.144526	0.919945	0.775419	1	0.108875	1.02048	1.12935	1_HSC	2_earlyLymphoid	NA
SEPT1	1	0	0	up	NA	3.5865e-16	-0.144635	0.877596	0.732961	1	0.0663759	1.04241	1.10879	1_HSC	2_earlyLymphoid	NA
PPP1R2	1	0	0	up	NA	1.45305e-17	-0.144743	0.835246	0.690503	0.109662	0.135244	1.0597	1.19495	1_HSC	2_earlyLymphoid	NA
ARPC5	1	0	0	up	NA	1.16358e-10	-0.145003	0.598634	0.453631	1.30238e-09	0.281817	1.21307	1.49489	1_HSC	2_earlyLymphoid	NA
UBE2D2	1	0	0	up	NA	4.16235e-11	-0.145276	0.598907	0.453631	2.96535e-06	0.210754	1.17575	1.3865	1_HSC	2_earlyLymphoid	NA
SIAH2	1	0	0	up	NA	1.72771e-23	-0.14559	0.909836	0.764246	1	0.0855378	1.04242	1.12796	1_HSC	2_earlyLymphoid	NA
CKLF	1	0	0	up	NA	2.34862e-12	-0.145787	0.638525	0.492737	0.149546	0.103621	1.17611	1.27974	1_HSC	2_earlyLymphoid	NA
ITGB7	1	0	0	up	NA	4.29243e-49	-0.146066	0.988525	0.842458	NA	0.269504	1	1.2695	1_HSC	2_earlyLymphoid	NA
SCAI	1	0	0	up	NA	1.9239e-15	-0.146094	0.862295	0.716201	1	0.0744594	1.04365	1.11811	1_HSC	2_earlyLymphoid	NA
COPE	1	0	0	up	NA	1.62542e-13	-0.146901	0.563661	0.41676	3.10158e-05	0.172133	1.27614	1.44828	1_HSC	2_earlyLymphoid	NA
ARF6	1	0	0	up	NA	4.81394e-17	-0.147037	0.795082	0.648045	0.0162006	0.185841	1.084	1.26984	1_HSC	2_earlyLymphoid	NA
LL22NC03-2H8.5	1	0	0	up	NA	2.06328e-36	-0.147672	0.966667	0.818994	1	0.107063	1.01639	1.12346	1_HSC	2_earlyLymphoid	NA
AFF1	1	0	0	up	NA	2.26754e-22	-0.148474	0.918306	0.769832	1	0.0609475	1.01672	1.07767	1_HSC	2_earlyLymphoid	NA
PSME2	1	0	0	up	NA	2.59027e-14	-0.149177	0.474317	0.32514	6.67461e-07	0.378027	1.56237	1.9404	1_HSC	2_earlyLymphoid	NA
BZW1	1	0	0	up	NA	8.6223e-14	-0.149231	0.684426	0.535196	0.35981	0.134349	1.15411	1.28846	1_HSC	2_earlyLymphoid	NA
OCIAD2	1	0	0	up	NA	9.4796e-12	-0.14927	0.65765	0.50838	0.0940618	0.114257	1.12211	1.23636	1_HSC	2_earlyLymphoid	NA
CCDC50	1	0	0	up	NA	8.61514e-41	-0.149312	0.968306	0.818994	1	0.158046	1.00862	1.16667	1_HSC	2_earlyLymphoid	NA
KRT10	1	0	0	up	NA	2.3884e-14	-0.149318	0.718033	0.568715	1	0.085201	1.1376	1.2228	1_HSC	2_earlyLymphoid	NA
CD48	1	0	0	up	NA	2.20439e-25	-0.149333	0.89235	0.743017	1	0.108298	1.04822	1.15652	1_HSC	2_earlyLymphoid	NA
UBC	1	0	0	up	NA	4.36007e-15	-0.149928	0.29071	0.140782	0	0.81394	2.16525	2.97919	1_HSC	2_earlyLymphoid	NA
CYTH4	1	0	0	up	NA	1.24914e-37	-0.150005	0.962295	0.812291	0.181922	0.272516	1.00725	1.27976	1_HSC	2_earlyLymphoid	NA
CD96	1	0	0	up	NA	2.42682e-46	-0.150238	0.989344	0.839106	NA	0.0555556	1	1.05556	1_HSC	2_earlyLymphoid	NA
ATF4	1	0	0	up	NA	3.86249e-12	-0.150394	0.607377	0.456983	0.000310378	0.191715	1.26096	1.45267	1_HSC	2_earlyLymphoid	NA
LCP1	1	0	0	up	NA	1.08942e-14	-0.151174	0.634973	0.483799	8.62747e-05	0.215754	1.21931	1.43506	1_HSC	2_earlyLymphoid	NA
ADD3	1	0	0	up	NA	7.29497e-22	-0.151226	0.90765	0.756425	0.648933	0.126079	1.02071	1.14679	1_HSC	2_earlyLymphoid	NA
TRA2B	1	0	0	up	NA	9.70203e-13	-0.151352	0.514481	0.363128	2.27566e-07	0.321172	1.39111	1.71228	1_HSC	2_earlyLymphoid	NA
LY86	1	0	0	up	NA	2.6774e-51	-0.151375	0.975956	0.824581	1	-0.0279386	1.29545	1.26752	1_HSC	2_earlyLymphoid	NA
EZR	1	0	0	up	NA	1.54471e-28	-0.151699	0.911475	0.759777	0.612538	0.150574	1.04012	1.1907	1_HSC	2_earlyLymphoid	NA
YPEL5	1	0	0	up	NA	6.34742e-14	-0.152128	0.729781	0.577654	0.588043	0.120027	1.31648	1.43651	1_HSC	2_earlyLymphoid	NA
FMNL1	1	0	0	up	NA	3.15298e-18	-0.15232	0.846175	0.693855	1	0.125643	1.05684	1.18248	1_HSC	2_earlyLymphoid	NA
NR3C1	1	0	0	up	NA	1.18736e-19	-0.153022	0.864754	0.711732	0.0087144	0.216444	1.06263	1.27907	1_HSC	2_earlyLymphoid	NA
TRAF3IP3	1	0	0	up	NA	7.06776e-18	-0.153076	0.874863	0.721788	0.0451769	0.167701	1.03712	1.20482	1_HSC	2_earlyLymphoid	NA
ACP1	1	0	0	up	NA	3.28993e-14	-0.1531	0.67377	0.52067	0.00139646	0.156857	1.10888	1.26573	1_HSC	2_earlyLymphoid	NA
MPC2	1	0	0	up	NA	9.07053e-16	-0.153553	0.690984	0.53743	5.64797e-05	0.189425	1.07869	1.26812	1_HSC	2_earlyLymphoid	NA
C17orf62	1	0	0	up	NA	6.98008e-22	-0.153578	0.889891	0.736313	0.226198	0.138989	1.03474	1.17373	1_HSC	2_earlyLymphoid	NA
DBI	1	0	0	up	NA	1.0073e-15	-0.153662	0.648634	0.494972	1.61549e-05	0.340694	1.3717	1.71239	1_HSC	2_earlyLymphoid	NA
MED30	1	0	0	up	NA	1.20668e-18	-0.154268	0.809016	0.654749	0.00842443	0.179938	1.02718	1.20712	1_HSC	2_earlyLymphoid	NA
SEPT7	1	0	0	up	NA	2.51331e-12	-0.155089	0.547268	0.392179	5.97593e-05	0.236416	1.31322	1.54963	1_HSC	2_earlyLymphoid	NA
RP11-1055B8.7	1	0	0	up	NA	1.98481e-39	-0.155147	0.969672	0.814525	NA	0.0301205	1	1.03012	1_HSC	2_earlyLymphoid	NA
UBE2E2	1	0	0	up	NA	1.30134e-41	-0.155196	0.967486	0.812291	NA	0.0833333	1	1.08333	1_HSC	2_earlyLymphoid	NA
ANAPC16	1	0	0	up	NA	1.17163e-12	-0.155712	0.619399	0.463687	0.00196618	0.190802	1.1967	1.3875	1_HSC	2_earlyLymphoid	NA
LSP1	1	1	0	up	up	3.35978e-15	-0.155834	0.613934	0.458101	0	1.56164	1.3765	2.93814	1_HSC	2_earlyLymphoid	NA
SELT	1	0	0	up	NA	2.08187e-17	-0.155912	0.822951	0.667039	1	0.0425677	1.06481	1.10738	1_HSC	2_earlyLymphoid	NA
PTPRCAP	1	0	0	up	NA	1.1802e-11	-0.156396	0.588798	0.432402	1.19373e-09	0.413539	1.35615	1.76969	1_HSC	2_earlyLymphoid	NA
CDKN2D	1	0	0	up	NA	5.2578e-46	-0.156635	0.965574	0.808939	0.854463	0.200084	1.03968	1.23977	1_HSC	2_earlyLymphoid	NA
PAN3	1	0	0	up	NA	9.86992e-17	-0.156687	0.838251	0.681564	0.189085	0.145685	1.0473	1.19298	1_HSC	2_earlyLymphoid	NA
LGALS9	1	0	0	up	NA	1.93848e-15	-0.159105	0.730055	0.57095	0.356926	0.105674	1.10526	1.21094	1_HSC	2_earlyLymphoid	NA
MYCBP2	1	0	0	up	NA	1.16889e-15	-0.15949	0.762842	0.603352	0.0124125	0.158665	1.08641	1.24507	1_HSC	2_earlyLymphoid	NA
GALNT2	1	0	0	up	NA	1.02998e-28	-0.159496	0.912568	0.753073	0.231625	0.17582	1.01875	1.19457	1_HSC	2_earlyLymphoid	NA
RBBP4	1	0	0	up	NA	9.74447e-15	-0.159537	0.623224	0.463687	0.0270523	0.125764	1.19507	1.32083	1_HSC	2_earlyLymphoid	NA
LINC00426	1	0	0	up	NA	2.99963e-52	-0.159845	0.984426	0.824581	NA	0.152866	1	1.15287	1_HSC	2_earlyLymphoid	NA
MGEA5	1	0	0	up	NA	9.89962e-21	-0.160639	0.848907	0.688268	1	0.0925418	1.07233	1.16487	1_HSC	2_earlyLymphoid	NA
LRRFIP1	1	0	0	up	NA	2.22139e-13	-0.160755	0.493716	0.332961	0	0.403512	1.38208	1.78559	1_HSC	2_earlyLymphoid	NA
TRAM1	1	0	0	up	NA	1.93696e-16	-0.160973	0.746448	0.585475	0.0897729	0.134832	1.11315	1.24798	1_HSC	2_earlyLymphoid	NA
APBB1IP	1	0	0	up	NA	2.21918e-22	-0.161639	0.866667	0.705028	0.31621	0.13388	1.03279	1.16667	1_HSC	2_earlyLymphoid	NA
GRSF1	1	0	0	up	NA	4.9264e-16	-0.162109	0.795628	0.63352	0.150042	0.121478	1.04011	1.16159	1_HSC	2_earlyLymphoid	NA
TXNIP	1	0	0	up	NA	2.10329e-17	-0.162579	0.72459	0.562011	3.85332e-06	0.555981	1.35218	1.90816	1_HSC	2_earlyLymphoid	NA
TOP2B	1	0	0	up	NA	2.08706e-21	-0.163664	0.838525	0.67486	0.000129462	0.239486	1.0423	1.28179	1_HSC	2_earlyLymphoid	NA
UMODL1	1	0	0	up	NA	6.25925e-42	-0.165188	0.995355	0.830168	NA	1.15132	0	1.15132	1_HSC	2_earlyLymphoid	NA
ERP29	1	0	0	up	NA	6.67462e-16	-0.166097	0.504645	0.338547	0	0.456012	1.4021	1.85811	1_HSC	2_earlyLymphoid	NA
CCDC12	1	0	0	up	NA	4.85432e-19	-0.166944	0.779235	0.612291	1	0.09784	1.06931	1.16715	1_HSC	2_earlyLymphoid	NA
WASF2	1	0	0	up	NA	2.84192e-19	-0.167115	0.771585	0.604469	3.39286e-06	0.240897	1.09809	1.33898	1_HSC	2_earlyLymphoid	NA
STRBP	1	0	0	up	NA	3.00039e-35	-0.167648	0.935246	0.767598	1	0.108122	1.01688	1.125	1_HSC	2_earlyLymphoid	NA
SLC8A1-AS1	1	0	0	up	NA	1.50943e-25	-0.169584	0.998634	0.82905	NA	1.23529	0	1.23529	1_HSC	2_earlyLymphoid	NA
CMTM6	1	0	0	up	NA	1.18953e-19	-0.170618	0.777322	0.606704	0.157568	0.120789	1.07239	1.19318	1_HSC	2_earlyLymphoid	NA
CD74	1	1	0	up	up	5.01e-21	-0.170921	0.188798	0.0178771	0	5.62375	5.12597	10.7497	1_HSC	2_earlyLymphoid	NA
SLC43A2	1	0	0	up	NA	5.97937e-45	-0.17158	0.95929	0.787709	1	0.15355	1.02013	1.17368	1_HSC	2_earlyLymphoid	NA
BTG1	1	0	0	up	NA	9.08311e-23	-0.172784	0.792896	0.620112	0.000946325	0.34754	1.37599	1.72353	1_HSC	2_earlyLymphoid	NA
CYBA	1	0	0	up	NA	2.5156e-23	-0.173074	0.304918	0.131844	5.08304e-09	0.511751	2.30936	2.82111	1_HSC	2_earlyLymphoid	NA
MYLK	1	0	0	up	NA	3.73119e-52	-0.173155	0.988798	0.815642	NA	0.0363636	1	1.03636	1_HSC	2_earlyLymphoid	NA
IQGAP1	1	0	0	up	NA	9.61515e-34	-0.173543	0.896448	0.722905	1	0.0666546	1.04222	1.10887	1_HSC	2_earlyLymphoid	NA
HNRNPH1	1	0	0	up	NA	1.39353e-17	-0.175008	0.630874	0.455866	1	0.32539	2.02369	2.34908	1_HSC	2_earlyLymphoid	NA
RAB11FIP1	1	0	0	up	NA	4.73727e-39	-0.176187	0.928142	0.751955	0.162544	0.194225	1.07605	1.27027	1_HSC	2_earlyLymphoid	NA
SLC38A1	1	0	0	up	NA	4.88492e-31	-0.177075	0.913388	0.736313	1	0.109274	1.02208	1.13136	1_HSC	2_earlyLymphoid	NA
LAPTM5	1	0	0	up	NA	4.87506e-16	-0.177238	0.618579	0.441341	1.42222e-11	0.672923	1.47708	2.15	1_HSC	2_earlyLymphoid	NA
UBE2I	1	0	0	up	NA	9.6e-18	-0.177501	0.656831	0.47933	0.00816246	0.144788	1.19427	1.33906	1_HSC	2_earlyLymphoid	NA
IRF1	1	0	0	up	NA	2.92824e-21	-0.177536	0.81776	0.640223	0.818521	0.0670379	1.26837	1.3354	1_HSC	2_earlyLymphoid	NA
B3GNT2	1	0	0	up	NA	1.46132e-23	-0.17815	0.865301	0.687151	2.99564e-05	0.323232	1.04462	1.36786	1_HSC	2_earlyLymphoid	NA
GNAS	1	0	0	up	NA	5.11621e-20	-0.179933	0.585519	0.405587	1.36224e-10	0.283758	1.2294	1.51316	1_HSC	2_earlyLymphoid	NA
HCST	1	0	0	up	NA	9.26039e-21	-0.181399	0.657377	0.475978	0	0.612615	1.35327	1.96588	1_HSC	2_earlyLymphoid	NA
CD47	1	0	0	up	NA	1.20396e-19	-0.181462	0.692077	0.510615	0.542302	0.0861016	1.16504	1.25114	1_HSC	2_earlyLymphoid	NA
HLA-DMB	1	0	0	up	NA	1.61513e-38	-0.181471	0.916667	0.735196	1	0.117313	1.11475	1.23207	1_HSC	2_earlyLymphoid	NA
CMTM7	1	0	0	up	NA	7.8925e-33	-0.181984	0.893716	0.711732	0.00217263	0.265031	1.03342	1.29845	1_HSC	2_earlyLymphoid	NA
POMP	1	0	0	up	NA	1.7743e-19	-0.183492	0.47623	0.292737	3.01095e-13	0.356761	1.36046	1.71722	1_HSC	2_earlyLymphoid	NA
SEP15	1	0	0	up	NA	4.70605e-18	-0.185255	0.609836	0.424581	6.05683e-06	0.18514	1.18768	1.37282	1_HSC	2_earlyLymphoid	NA
IER2	1	0	0	up	NA	6.22019e-19	-0.185922	0.667486	0.481564	1	0.11778	1.66886	1.78664	1_HSC	2_earlyLymphoid	NA
RABAC1	1	0	0	up	NA	4.47752e-19	-0.187094	0.615027	0.427933	5.52562e-05	0.202207	1.20795	1.41016	1_HSC	2_earlyLymphoid	NA
RASGRP2	1	0	0	up	NA	2.68113e-29	-0.187909	0.803552	0.615642	0.0282502	0.167691	1.0765	1.24419	1_HSC	2_earlyLymphoid	NA
RP11-347P5.1	1	0	0	up	NA	1.08913e-25	-0.188616	0.834426	0.64581	1.73271e-06	0.33603	1.10561	1.44164	1_HSC	2_earlyLymphoid	NA
MEF2A	1	0	0	up	NA	1.25854e-52	-0.188764	0.965301	0.776536	1	0.051378	1.02362	1.075	1_HSC	2_earlyLymphoid	NA
NEGR1	1	0	0	up	NA	1.18045e-51	-0.189877	0.953005	0.763128	1	0.134928	1.03488	1.16981	1_HSC	2_earlyLymphoid	NA
ARL4C	1	0	0	up	NA	1.09176e-60	-0.191003	0.977596	0.786592	0.957912	0.181586	1.04878	1.23037	1_HSC	2_earlyLymphoid	NA
LST1	1	0	0	up	NA	4.83551e-19	-0.191054	0.512842	0.321788	0	0.696256	1.50308	2.19934	1_HSC	2_earlyLymphoid	NA
MME	1	0	0	up	NA	4.45681e-25	-0.193321	0.998907	0.805587	NA	1.26437	0	1.26437	1_HSC	2_earlyLymphoid	NA
FNBP1	1	0	0	up	NA	1.42371e-20	-0.193665	0.65847	0.464804	6.64432e-11	0.275586	1.1336	1.40919	1_HSC	2_earlyLymphoid	NA
FAM49B	1	0	0	up	NA	2.05037e-25	-0.193986	0.719126	0.52514	0.0048638	0.145235	1.09241	1.23765	1_HSC	2_earlyLymphoid	NA
IDH2	1	0	0	up	NA	5.75927e-25	-0.19474	0.610383	0.415642	0.966126	0.100042	1.3359	1.43595	1_HSC	2_earlyLymphoid	NA
HLA-DPA1	1	0	0	up	NA	8.00589e-21	-0.195164	0.416393	0.221229	4.29653e-08	0.579882	1.90075	2.48063	1_HSC	2_earlyLymphoid	NA
LRRC26	1	0	0	up	NA	4.75154e-50	-0.19519	0.952732	0.757542	1	0.141286	1.12139	1.26267	1_HSC	2_earlyLymphoid	NA
MDM4	1	0	0	up	NA	1.60345e-29	-0.196204	0.807377	0.611173	9.8817e-05	0.317095	1.18865	1.50575	1_HSC	2_earlyLymphoid	NA
TUBB	1	0	0	up	NA	3.64471e-27	-0.196239	0.368306	0.172067	0.000130838	-0.484312	3.85813	3.37382	1_HSC	2_earlyLymphoid	NA
LPXN	1	0	0	up	NA	4.71071e-57	-0.196785	0.968852	0.772067	1	0.0559856	1.01754	1.07353	1_HSC	2_earlyLymphoid	NA
RNASET2	1	0	0	up	NA	4.75347e-27	-0.197646	0.680328	0.482682	5.17637e-06	0.235753	1.23077	1.46652	1_HSC	2_earlyLymphoid	NA
IGFBP7	1	0	0	up	NA	3.13163e-26	-0.200778	0.490164	0.289385	1.18061e-12	0.494216	1.52465	2.01887	1_HSC	2_earlyLymphoid	NA
RP11-356I2.4	1	0	0	up	NA	4.96978e-59	-0.203787	0.968033	0.764246	NA	0.208531	1	1.20853	1_HSC	2_earlyLymphoid	NA
PIM3	1	0	0	up	NA	1.23132e-40	-0.203882	0.888798	0.684916	0.000194284	0.262638	1.05651	1.31915	1_HSC	2_earlyLymphoid	NA
VPREB3	1	0	0	up	NA	1.17265e-30	-0.20422	0.998634	0.794413	NA	3.33696	0	3.33696	1_HSC	2_earlyLymphoid	NA
LGMN	1	0	0	up	NA	4.37822e-59	-0.204913	0.992623	0.787709	NA	1.15789	0	1.15789	1_HSC	2_earlyLymphoid	NA
RUNX2	1	0	0	up	NA	4.84874e-49	-0.206925	0.927596	0.72067	1.1401e-08	0.530491	1.04151	1.572	1_HSC	2_earlyLymphoid	NA
MIR142	1	0	0	up	NA	3.01269e-29	-0.207925	0.745355	0.53743	3.36964e-09	0.409669	1.21352	1.62319	1_HSC	2_earlyLymphoid	NA
GPSM3	1	0	0	up	NA	3.93939e-26	-0.209047	0.75765	0.548603	0.0131848	0.140151	1.12965	1.2698	1_HSC	2_earlyLymphoid	NA
CXXC5	1	0	0	up	NA	1.1183e-32	-0.209483	0.863115	0.653631	0.000638641	0.214919	1.03992	1.25484	1_HSC	2_earlyLymphoid	NA
PRKCB	1	0	0	up	NA	5.95593e-42	-0.209966	0.89153	0.681564	0.149527	0.161227	1.03526	1.19649	1_HSC	2_earlyLymphoid	NA
IKZF1	1	0	0	up	NA	1.39968e-37	-0.210309	0.813661	0.603352	0.0115615	0.191128	1.08211	1.27324	1_HSC	2_earlyLymphoid	NA
IRF2BP2	1	0	0	up	NA	4.07109e-25	-0.212768	0.61612	0.403352	4.19336e-11	0.348489	1.26762	1.6161	1_HSC	2_earlyLymphoid	NA
STARD4-AS1	1	0	0	up	NA	4.08454e-38	-0.213596	0.904098	0.690503	0.521333	0.142707	1.03419	1.1769	1_HSC	2_earlyLymphoid	NA
CD38	1	0	0	up	NA	5.26634e-49	-0.21442	0.917213	0.702793	0.149322	0.155798	1.06601	1.2218	1_HSC	2_earlyLymphoid	NA
ITGA4	1	0	0	up	NA	5.09172e-28	-0.214849	0.735519	0.52067	1.33427e-09	0.359848	1.125	1.48485	1_HSC	2_earlyLymphoid	NA
CARHSP1	1	0	0	up	NA	1.00328e-40	-0.215265	0.854372	0.639106	0.611679	0.102643	1.07692	1.17957	1_HSC	2_earlyLymphoid	NA
SEC61B	1	0	0	up	NA	4.72137e-29	-0.21627	0.484426	0.268156	0	0.423199	1.40276	1.82595	1_HSC	2_earlyLymphoid	NA
PPP1CA	1	0	0	up	NA	1.92268e-29	-0.2191	0.682787	0.463687	1.97529e-05	0.220763	1.16882	1.38958	1_HSC	2_earlyLymphoid	NA
TSC22D3	1	0	0	up	NA	9.0363e-22	-0.219117	0.594536	0.375419	0.00239125	0.339257	2.19205	2.53131	1_HSC	2_earlyLymphoid	NA
RNASE6	1	0	0	up	NA	4.47916e-75	-0.221766	0.975956	0.75419	1	0.118182	1.25	1.36818	1_HSC	2_earlyLymphoid	NA
DCK	1	0	0	up	NA	9.1092e-33	-0.222849	0.815027	0.592179	1.82418e-07	0.314567	1.06352	1.37808	1_HSC	2_earlyLymphoid	NA
STMN1	1	1	0	up	up	2.36334e-36	-0.224071	0.297814	0.073743	0	1.63474	4.06732	5.70205	1_HSC	2_earlyLymphoid	NA
RP11-220I1.1	1	0	0	up	NA	6.84097e-43	-0.224857	0.875137	0.650279	7.16207e-09	0.3124	1.02626	1.33866	1_HSC	2_earlyLymphoid	NA
PSMA6	1	0	0	up	NA	4.711e-48	-0.22534	0.903552	0.678212	0.0998778	0.137974	1.01133	1.14931	1_HSC	2_earlyLymphoid	NA
GUK1	1	0	0	up	NA	1.47875e-32	-0.225706	0.687158	0.461453	1.24064e-09	0.236326	1.13712	1.37344	1_HSC	2_earlyLymphoid	NA
LAIR1	1	0	0	up	NA	6.54788e-33	-0.226996	0.81694	0.589944	2.33805e-06	0.302505	1.04627	1.34877	1_HSC	2_earlyLymphoid	NA
ACY3	1	1	0	up	up	2.54123e-78	-0.227402	0.97377	0.746369	2.96011e-06	1.75766	1.11458	2.87225	1_HSC	2_earlyLymphoid	NA
CYFIP2	1	0	0	up	NA	2.20791e-56	-0.227905	0.92623	0.698324	0.503979	0.12963	1.01481	1.14444	1_HSC	2_earlyLymphoid	NA
PSMB9	1	0	0	up	NA	9.11189e-34	-0.230613	0.730055	0.499441	6.97696e-07	0.239842	1.16194	1.40179	1_HSC	2_earlyLymphoid	NA
TRABD	1	0	0	up	NA	1.49954e-52	-0.237026	0.880601	0.643575	0.388692	0.121224	1.04805	1.16928	1_HSC	2_earlyLymphoid	NA
AGPS	1	0	0	up	NA	1.11249e-50	-0.237059	0.904098	0.667039	2.52009e-10	0.393315	1.02279	1.41611	1_HSC	2_earlyLymphoid	NA
HERPUD1	1	0	0	up	NA	6.86209e-67	-0.237195	0.935519	0.698324	0.0338174	0.26177	1.12712	1.38889	1_HSC	2_earlyLymphoid	NA
YWHAZ	1	0	0	up	NA	1.46471e-33	-0.240042	0.645628	0.405587	0	0.384467	1.23207	1.61654	1_HSC	2_earlyLymphoid	NA
IRF8	1	0	0	up	NA	3.83864e-72	-0.24062	0.93224	0.69162	1	0.308146	2.39113	2.69928	1_HSC	2_earlyLymphoid	NA
FAM129C	1	0	0	up	NA	6.32839e-45	-0.24196	0.997268	0.755307	NA	1.20548	0	1.20548	1_HSC	2_earlyLymphoid	NA
MYL12A	1	0	0	up	NA	5.34216e-29	-0.24208	0.51694	0.27486	0	0.593384	1.40045	1.99384	1_HSC	2_earlyLymphoid	NA
CD79B	1	0	0	up	NA	1.99079e-90	-0.245181	0.978142	0.732961	5.45018e-05	0.608944	1.5375	2.14644	1_HSC	2_earlyLymphoid	NA
IL7R	1	0	0	up	NA	5.72909e-77	-0.251665	0.987978	0.736313	NA	0.114407	1.25	1.36441	1_HSC	2_earlyLymphoid	NA
HLA-DRA	1	1	0	up	up	3.86095e-37	-0.25194	0.325683	0.073743	0	3.43129	3.38898	6.82027	1_HSC	2_earlyLymphoid	NA
CAPG	1	0	0	up	NA	1.01433e-40	-0.253047	0.763661	0.510615	0	0.466701	1.10636	1.57306	1_HSC	2_earlyLymphoid	NA
LDLRAD4	1	0	0	up	NA	5.37974e-81	-0.253593	0.964208	0.710615	1	0.166819	1.0687	1.23552	1_HSC	2_earlyLymphoid	NA
MIR181A1HG	1	0	0	up	NA	1.75644e-57	-0.255289	0.85082	0.595531	2.41213e-07	0.273187	1.11355	1.38674	1_HSC	2_earlyLymphoid	NA
STK17B	1	0	0	up	NA	6.24946e-43	-0.255428	0.757104	0.501676	7.32945e-09	0.359173	1.20585	1.56502	1_HSC	2_earlyLymphoid	NA
PPP1R18	1	0	0	up	NA	1.27646e-46	-0.25628	0.843989	0.587709	0.000217577	0.216086	1.06305	1.27913	1_HSC	2_earlyLymphoid	NA
CD99	1	1	0	up	up	3.58199e-39	-0.26032	0.425683	0.165363	0	2.24372	1.63178	3.8755	1_HSC	2_earlyLymphoid	NA
UBE2J1	1	0	0	up	NA	4.93391e-47	-0.260697	0.771311	0.510615	1.82287e-10	0.312884	1.10036	1.41324	1_HSC	2_earlyLymphoid	NA
TSC22D4	1	0	0	up	NA	1.47984e-49	-0.263383	0.851093	0.587709	0.000198779	0.1982	1.03486	1.23306	1_HSC	2_earlyLymphoid	NA
PMAIP1	1	0	0	up	NA	3.04854e-53	-0.263741	0.810109	0.546369	8.59297e-15	0.625633	1.27338	1.89901	1_HSC	2_earlyLymphoid	NA
BCL11A	1	0	0	up	NA	1.42014e-39	-0.264305	0.659836	0.395531	0	0.577911	1.27791	1.85582	1_HSC	2_earlyLymphoid	NA
SATB1	1	0	0	up	NA	5.73036e-43	-0.265473	0.795082	0.529609	8.11571e-08	0.295386	1.12267	1.41805	1_HSC	2_earlyLymphoid	NA
RNASEH2B	1	0	0	up	NA	4.80835e-41	-0.266175	0.613661	0.347486	0	0.460227	1.26238	1.7226	1_HSC	2_earlyLymphoid	NA
SOX4	1	1	0	up	up	6.45478e-40	-0.266351	0.418306	0.151955	0	2.56849	2.46313	5.03162	1_HSC	2_earlyLymphoid	NA
EBF1	1	0	0	up	NA	3.92764e-14	-0.272352	0.999727	0.727374	NA	1.56967	0	1.56967	1_HSC	2_earlyLymphoid	NA
IL2RG	1	0	0	up	NA	6.12188e-56	-0.272742	0.844809	0.572067	0.00391122	0.143258	1.10739	1.25065	1_HSC	2_earlyLymphoid	NA
C12orf75	1	0	0	up	NA	2.1945e-65	-0.276323	0.859563	0.58324	2.7118e-05	0.288569	1.11089	1.39946	1_HSC	2_earlyLymphoid	NA
KMT2E	1	0	0	up	NA	5.26634e-49	-0.276594	0.722404	0.44581	8.59297e-15	0.367983	1.16831	1.53629	1_HSC	2_earlyLymphoid	NA
CALM1	1	0	0	up	NA	2.53793e-50	-0.278789	0.74918	0.470391	4.39669e-11	0.311064	1.2037	1.51477	1_HSC	2_earlyLymphoid	NA
SASH3	1	0	0	up	NA	2.46818e-75	-0.279449	0.919672	0.640223	0.0268675	0.177758	1.02721	1.20497	1_HSC	2_earlyLymphoid	NA
PLP2	1	0	0	up	NA	7.32064e-57	-0.282653	0.788798	0.506145	4.38855e-15	0.479858	1.16041	1.64027	1_HSC	2_earlyLymphoid	NA
EVL	1	0	0	up	NA	1.32026e-62	-0.284368	0.862022	0.577654	6.08656e-09	0.337419	1.05941	1.39683	1_HSC	2_earlyLymphoid	NA
C5orf56	1	0	0	up	NA	2.51508e-73	-0.286899	0.92377	0.636872	1.8601e-05	0.269788	1.02867	1.29846	1_HSC	2_earlyLymphoid	NA
RCSD1	1	0	0	up	NA	9.83104e-59	-0.288975	0.830874	0.541899	3.82727e-12	0.424512	1.14378	1.56829	1_HSC	2_earlyLymphoid	NA
EIF4G2	1	0	0	up	NA	2.1393e-51	-0.293247	0.702186	0.408939	0	0.387095	1.20459	1.59168	1_HSC	2_earlyLymphoid	NA
DDIT4	1	0	0	up	NA	1.47828e-78	-0.2994	0.889344	0.589944	3.53868e-08	0.636169	1.17037	1.80654	1_HSC	2_earlyLymphoid	NA
CCND3	1	0	0	up	NA	3.46309e-80	-0.302606	0.895902	0.593296	4.00737e-09	0.495068	1.07087	1.56593	1_HSC	2_earlyLymphoid	NA
KLF6	1	0	0	up	NA	2.58725e-48	-0.303753	0.644536	0.340782	1.78763e-07	0.488633	1.74865	2.23729	1_HSC	2_earlyLymphoid	NA
MED13L	1	0	0	up	NA	7.3736e-74	-0.30769	0.880874	0.573184	0.000991635	0.210349	1.04358	1.25393	1_HSC	2_earlyLymphoid	NA
SEPT9	1	0	0	up	NA	7.41928e-93	-0.316116	0.903825	0.587709	1.85721e-07	0.302607	1.01989	1.32249	1_HSC	2_earlyLymphoid	NA
PAG1	1	0	0	up	NA	6.74941e-113	-0.319866	0.973497	0.653631	0.0892489	0.242634	1.04124	1.28387	1_HSC	2_earlyLymphoid	NA
MEF2C	1	0	0	up	NA	2.36152e-68	-0.327896	0.801639	0.473743	0	0.476137	1.12259	1.59873	1_HSC	2_earlyLymphoid	NA
NREP	1	0	0	up	NA	5.51409e-67	-0.344615	0.690984	0.346369	0	0.396463	1.20866	1.60513	1_HSC	2_earlyLymphoid	NA
IGLL1	1	1	0	up	up	2.92714e-69	-0.346521	0.543169	0.196648	0	4.13411	4.70873	8.84284	1_HSC	2_earlyLymphoid	NA
CD53	1	0	0	up	NA	1.72126e-67	-0.357632	0.70847	0.350838	0	0.390259	1.19494	1.5852	1_HSC	2_earlyLymphoid	NA
MZB1	1	0	0	up	NA	5.73883e-88	-0.36611	0.804098	0.437989	7.92391e-11	0.520137	1.42817	1.94831	1_HSC	2_earlyLymphoid	NA
SH3KBP1	1	0	0	up	NA	1.79571e-92	-0.371134	0.829235	0.458101	0	0.359357	1.0592	1.41856	1_HSC	2_earlyLymphoid	NA
GLRX	1	0	0	up	NA	7.33013e-94	-0.379053	0.824863	0.44581	0	0.955359	1.07488	2.03024	1_HSC	2_earlyLymphoid	NA
TCF4	1	0	0	up	NA	2.11588e-109	-0.40704	0.834973	0.427933	0	0.479343	1.12417	1.60352	1_HSC	2_earlyLymphoid	NA
BLNK	1	0	0	up	NA	1.33876e-140	-0.419932	0.98306	0.563128	1	0.129692	1.22581	1.3555	1_HSC	2_earlyLymphoid	NA
CD79A	1	0	0	up	NA	1.74312e-99	-0.424157	0.993989	0.569832	NA	2.67013	0	2.67013	1_HSC	2_earlyLymphoid	NA
ZCCHC7	1	1	0	up	up	3.81796e-157	-0.443743	0.917486	0.473743	0	1.01997	1.03311	2.05308	1_HSC	2_earlyLymphoid	NA
CYGB	1	0	0	up	NA	1.22131e-38	-0.449186	0.998907	0.549721	NA	2.5062	0	2.5062	1_HSC	2_earlyLymphoid	NA
CXCR4	1	0	0	up	NA	2.8239e-152	-0.449272	0.895082	0.44581	6.14249e-11	0.77747	1.41406	2.19153	1_HSC	2_earlyLymphoid	NA
LAT2	1	1	0	up	up	2.08418e-129	-0.494276	0.731148	0.236872	0	1.1335	1.20325	2.33675	1_HSC	2_earlyLymphoid	NA
CORO1A	1	1	0	up	up	4.0524e-122	-0.511779	0.660383	0.148603	0	1.23687	1.51247	2.74934	1_HSC	2_earlyLymphoid	NA
ADA	1	1	0	up	up	8.28682e-145	-0.520559	0.767486	0.246927	0	1.10717	1.21034	2.31751	1_HSC	2_earlyLymphoid	NA
VPREB1	1	1	0	up	up	6.62752e-173	-0.542217	0.985792	0.443575	4.89643e-07	1.74591	1.38462	3.13052	1_HSC	2_earlyLymphoid	NA
LTB	1	1	0	up	up	1.79822e-230	-0.570438	0.960383	0.389944	0	5.49895	1.36552	6.86447	1_HSC	2_earlyLymphoid	NA
IGJ	1	0	0	up	NA	7.96117e-199	-0.68377	0.988798	0.305028	NA	4.58835	2.29268	6.88103	1_HSC	2_earlyLymphoid	NA
DNTT	1	1	0	up	up	0	-0.751239	0.944536	0.193296	0	5.76443	3.35468	9.11911	1_HSC	2_earlyLymphoid	NA
EIF4A2	0	1	1	NA	down	0.00194096	0.0266828	0.356557	0.38324	3.0771e-06	-2.02857	3.66263	1.63406	1_HSC	2_earlyLymphoid	down
RPS7	0	1	1	NA	down	NA	0	0	0	0	-2.58667	17.0604	14.4737	1_HSC	2_earlyLymphoid	down
ATP5C1	0	0	1	NA	NA	6.29437e-06	-0.0934213	0.369399	0.275978	0.00015694	-0.594473	2.23953	1.64506	1_HSC	2_earlyLymphoid	down
EIF3F	0	1	1	NA	down	0.000244748	-0.0629697	0.207104	0.144134	4.24893e-05	-1.24068	3.28246	2.04178	1_HSC	2_earlyLymphoid	down
SNRPF	0	0	1	NA	NA	6.4322e-05	-0.0739247	0.354372	0.280447	0.000760322	-0.56861	2.32482	1.75621	1_HSC	2_earlyLymphoid	down
COX6C	0	1	1	NA	down	2.72401e-06	-0.078426	0.240437	0.162011	2.59946e-05	-1.16781	3.28114	2.11333	1_HSC	2_earlyLymphoid	down
PSMB1	0	0	1	NA	NA	0.0102661	-0.0574366	0.417213	0.359777	6.05683e-06	-0.636434	2.18094	1.5445	1_HSC	2_earlyLymphoid	down
GDI2	0	0	1	NA	NA	0.00310349	-0.0759395	0.364208	0.288268	5.00151e-06	-0.580071	2.27081	1.69074	1_HSC	2_earlyLymphoid	down
TBCA	0	0	1	NA	NA	0.0662163	-0.0496306	0.39153	0.341899	0.000150291	-0.613272	2.26692	1.65365	1_HSC	2_earlyLymphoid	down
CCT8	0	0	1	NA	NA	0.00941241	-0.0606038	0.387978	0.327374	6.31106e-05	-0.618286	2.26779	1.6495	1_HSC	2_earlyLymphoid	down
ARPC2	0	1	1	NA	down	0.0191912	-0.0436868	0.232514	0.188827	2.39101e-05	-1.22713	3.45441	2.22727	1_HSC	2_earlyLymphoid	down
ATP5A1	0	0	1	NA	NA	0.000818683	-0.0663431	0.331148	0.264804	0.000750318	-0.52272	2.34795	1.82523	1_HSC	2_earlyLymphoid	down
SHFM1	0	0	1	NA	NA	0.0688429	-0.0538404	0.428142	0.374302	0.000122352	-0.645335	2.18105	1.53571	1_HSC	2_earlyLymphoid	down
PCBP2	0	1	1	NA	down	0.000954982	-0.0621394	0.244262	0.182123	2.82129e-07	-1.29905	3.34549	2.04645	1_HSC	2_earlyLymphoid	down
HNRNPC	0	0	1	NA	NA	4.78178e-05	-0.0625363	0.176503	0.113966	8.59297e-15	-0.932891	3.49027	2.55738	1_HSC	2_earlyLymphoid	down
HNRNPK	0	0	1	NA	NA	0.000103845	-0.0713863	0.205464	0.134078	0	-0.973468	3.4625	2.48903	1_HSC	2_earlyLymphoid	down
TMA7	0	0	1	NA	NA	4.05542e-07	-0.0723632	0.161749	0.0893855	0	-0.709304	3.4271	2.71779	1_HSC	2_earlyLymphoid	down
RBM3	0	1	1	NA	down	2.23888e-08	-0.0896724	0.237158	0.147486	2.43285e-13	-1.06766	3.44511	2.37746	1_HSC	2_earlyLymphoid	down
HNRNPA0	0	0	1	NA	NA	2.3e-05	-0.096616	0.413934	0.317318	0.000153798	-0.574197	2.29105	1.71686	1_HSC	2_earlyLymphoid	down
NDUFA4	0	0	1	NA	NA	7.23403e-07	-0.0743383	0.198361	0.124022	0	-0.905589	3.35329	2.4477	1_HSC	2_earlyLymphoid	down
ARPC3	0	1	1	NA	down	2.92504e-06	-0.0880132	0.248907	0.160894	2.86719e-13	-1.01878	3.34901	2.33023	1_HSC	2_earlyLymphoid	down
TMEM66	0	0	1	NA	NA	0.021197	-0.0532772	0.315847	0.26257	7.2027e-07	-0.435198	2.42459	1.98939	1_HSC	2_earlyLymphoid	down
PSME1	0	0	1	NA	NA	5.68348e-07	-0.0813551	0.171858	0.0905028	0	-0.612519	3.40982	2.7973	1_HSC	2_earlyLymphoid	down
TMSB4X	0	1	0	NA	up	0.0156938	-0.0409836	0.0409836	0	0	23.072	7.5057	30.5777	1_HSC	2_earlyLymphoid	NA
MALAT1	0	1	0	NA	up	0.868415	-0.000273224	0.000273224	0	4.11393e-10	21.6467	159.242	180.888	1_HSC	2_earlyLymphoid	NA
PTMA	0	1	0	NA	up	NA	0	0	0	0	16.3131	18.85	35.1631	1_HSC	2_earlyLymphoid	NA
TMSB10	0	1	0	NA	up	0.00360363	-0.122404	0.122404	0	0	9.77618	4.29421	14.0704	1_HSC	2_earlyLymphoid	NA
ACTG1	0	1	0	NA	up	0.000155469	-0.0326404	0.0393443	0.00670391	0	8.73169	5.10296	13.8346	1_HSC	2_earlyLymphoid	NA
ACTB	0	1	0	NA	up	0.000524192	-0.0302302	0.0346995	0.00446927	0	6.14976	9.3957	15.5455	1_HSC	2_earlyLymphoid	NA
HMGB1	0	1	0	NA	up	4.62924e-07	-0.0480187	0.0636612	0.0156425	0	5.70632	5.15407	10.8604	1_HSC	2_earlyLymphoid	NA
B2M	0	1	0	NA	up	NA	0	0	0	0	5.4625	11.5967	17.0592	1_HSC	2_earlyLymphoid	NA
MT-CO1	0	1	0	NA	up	NA	0	0	0	0	3.81315	19.2383	23.0514	1_HSC	2_earlyLymphoid	NA
H3F3A	0	1	0	NA	up	0.0871869	-0.00789908	0.00901639	0.00111732	0	2.58434	5.79597	8.38031	1_HSC	2_earlyLymphoid	NA
GPX1	0	1	0	NA	up	5.87567e-11	-0.095778	0.163934	0.0681564	0	1.56105	2.5085	4.06954	1_HSC	2_earlyLymphoid	NA
RPL10	0	1	0	NA	up	NA	0	0	0	7.27834e-06	1.53558	44.2923	45.8279	1_HSC	2_earlyLymphoid	NA
HNRNPA1	0	1	0	NA	up	0.480598	-0.00136612	0.00136612	0	1.49234e-07	1.48275	10.4435	11.9263	1_HSC	2_earlyLymphoid	NA
ATP5E	0	1	0	NA	up	3.94531e-10	-0.0701499	0.0857923	0.0156425	0	1.4558	2.71219	4.16799	1_HSC	2_earlyLymphoid	NA
H3F3B	0	1	0	NA	up	0.000708504	-0.0402265	0.0748634	0.0346369	3.40815e-09	1.33738	8.10012	9.4375	1_HSC	2_earlyLymphoid	NA
SRP14	0	1	0	NA	up	1.50912e-08	-0.0681686	0.0994536	0.0312849	0	1.30136	2.4645	3.76586	1_HSC	2_earlyLymphoid	NA
ATP5L	0	1	0	NA	up	1.2392e-05	-0.0457108	0.0669399	0.0212291	0	1.23764	2.65505	3.89269	1_HSC	2_earlyLymphoid	NA
H2AFY	0	1	0	NA	up	0.10432	0.0142534	0.0628415	0.077095	0	1.21854	2.96064	4.17918	1_HSC	2_earlyLymphoid	NA
PPIA	0	1	0	NA	up	1.95382e-06	-0.0537122	0.0838798	0.0301676	0	1.18689	3.71518	4.90207	1_HSC	2_earlyLymphoid	NA
RPL4	0	1	0	NA	down	0.860437	0.00057087	0.000546448	0.00111732	1.00479e-11	-1.0106	8.68398	7.67338	1_HSC	2_earlyLymphoid	NA
ZFAS1	0	1	0	NA	down	1.68584e-05	0.0390924	0.0368852	0.0759777	0	-1.07356	4.38553	3.31197	1_HSC	2_earlyLymphoid	NA
NPM1	0	1	0	NA	down	0.860437	-0.000273224	0.000273224	0	3.78738e-14	-1.17752	10.563	9.38547	1_HSC	2_earlyLymphoid	NA
RPL6	0	1	0	NA	down	NA	0	0	0	2.42588e-12	-1.2641	14.5814	13.3173	1_HSC	2_earlyLymphoid	NA
RPLP0	0	1	0	NA	down	NA	0	0	0	1.22082e-12	-1.27897	15.5036	14.2246	1_HSC	2_earlyLymphoid	NA
RPL23	0	1	0	NA	down	NA	0	0	0	0	-1.29143	9.48361	8.19218	1_HSC	2_earlyLymphoid	NA
RPLP2	0	1	0	NA	down	NA	0	0	0	7.41527e-12	-1.35081	20.1888	18.838	1_HSC	2_earlyLymphoid	NA
RPL36A	0	1	0	NA	down	0.000147232	0.0128858	0.00163934	0.0145251	0	-1.36039	6.7266	5.36621	1_HSC	2_earlyLymphoid	NA
RPL14	0	1	0	NA	down	NA	0	0	0	3.06993e-09	-1.36754	15.0402	13.6726	1_HSC	2_earlyLymphoid	NA
RPL24	0	1	0	NA	down	0.852853	-0.000273224	0.000273224	0	0	-1.389	10.1946	8.80559	1_HSC	2_earlyLymphoid	NA
HSP90AB1	0	1	0	NA	down	7.23148e-33	0.0904494	0.0101093	0.100559	0	-1.38975	5.28291	3.89317	1_HSC	2_earlyLymphoid	NA
RPL22	0	1	0	NA	down	0.392686	0.00111732	0	0.00111732	0	-1.39386	10.1612	8.76734	1_HSC	2_earlyLymphoid	NA
ENO1	0	1	0	NA	down	2.51097e-21	0.0957444	0.0595628	0.155307	0	-1.46626	4.51917	3.05291	1_HSC	2_earlyLymphoid	NA
GNB2L1	0	1	0	NA	down	NA	0	0	0	4.58787e-11	-1.46844	13.2249	11.7564	1_HSC	2_earlyLymphoid	NA
FAU	0	1	0	NA	down	0.410556	0.00111732	0	0.00111732	0	-1.50488	8.75656	7.25168	1_HSC	2_earlyLymphoid	NA
RPL18	0	1	0	NA	down	NA	0	0	0	0	-1.66592	13.7251	12.0592	1_HSC	2_earlyLymphoid	NA
MT-ND3	0	1	0	NA	down	0.0138093	0.00898739	0.00218579	0.0111732	0	-1.72269	10.1577	8.43503	1_HSC	2_earlyLymphoid	NA
TPT1	0	1	0	NA	down	NA	0	0	0	4.89147e-10	-1.79309	15.5842	13.7911	1_HSC	2_earlyLymphoid	NA
RPS21	0	1	0	NA	down	NA	0	0	0	0	-1.92584	11.2811	9.35531	1_HSC	2_earlyLymphoid	NA
EIF3E	0	1	0	NA	down	0.00465517	0.0133056	0.0079235	0.0212291	0	-1.94006	6.59075	4.65068	1_HSC	2_earlyLymphoid	NA
RPL37	0	1	0	NA	down	NA	0	0	0	0	-2.02132	19.7085	17.6872	1_HSC	2_earlyLymphoid	NA
RPS20	0	1	0	NA	down	NA	0	0	0	0	-2.1832	14.7642	12.581	1_HSC	2_earlyLymphoid	NA
RPS19	0	1	0	NA	down	NA	0	0	0	0	-2.24192	30.2989	28.057	1_HSC	2_earlyLymphoid	NA
RPS25	0	1	0	NA	down	NA	0	0	0	0	-2.3614	15.9648	13.6034	1_HSC	2_earlyLymphoid	NA
RPS27	0	1	0	NA	down	NA	0	0	0	5.01142e-08	-2.46315	34.5615	32.0983	1_HSC	2_earlyLymphoid	NA
EEF1B2	0	1	0	NA	down	0.00269493	0.00754801	0.000273224	0.00782123	0	-2.67126	9.48319	6.81194	1_HSC	2_earlyLymphoid	NA
RPLP1	0	1	0	NA	down	NA	0	0	0	1.79744e-07	-2.70577	47.4041	44.6983	1_HSC	2_earlyLymphoid	NA
FTL	0	1	0	NA	down	6.75651e-11	0.0341148	0.00163934	0.0357542	0	-2.70624	7.65873	4.95249	1_HSC	2_earlyLymphoid	NA
RPS9	0	1	0	NA	down	NA	0	0	0	0	-2.71005	17.6128	14.9028	1_HSC	2_earlyLymphoid	NA
RPS5	0	1	0	NA	down	NA	0	0	0	0	-2.71596	15.0735	12.3575	1_HSC	2_earlyLymphoid	NA
RPL8	0	1	0	NA	down	NA	0	0	0	0	-2.7619	12.9552	10.1933	1_HSC	2_earlyLymphoid	NA
RPL15	0	1	0	NA	down	NA	0	0	0	0	-2.77531	23.3675	20.5922	1_HSC	2_earlyLymphoid	NA
HINT1	0	1	0	NA	down	4.33453e-06	0.0254251	0.000273224	0.0256983	0	-3.03001	6.97841	3.94839	1_HSC	2_earlyLymphoid	NA
RPL13A	0	1	0	NA	down	NA	0	0	0	0	-3.04745	38.1268	35.0793	1_HSC	2_earlyLymphoid	NA
RPL30	0	1	0	NA	down	NA	0	0	0	0	-3.04795	16.0167	12.9687	1_HSC	2_earlyLymphoid	NA
RPS27A	0	1	0	NA	down	NA	0	0	0	0	-3.15133	25.1781	22.0268	1_HSC	2_earlyLymphoid	NA
RPL38	0	1	0	NA	down	0.483052	0.00111732	0	0.00111732	0	-3.15484	11.0866	7.93177	1_HSC	2_earlyLymphoid	NA
FTH1	0	1	0	NA	down	1.00214e-25	0.0890054	0.0204918	0.109497	1.85589e-09	-3.21974	10.3916	7.17189	1_HSC	2_earlyLymphoid	NA
MT-ND2	0	1	0	NA	down	0.775674	-0.000546448	0.000546448	0	0	-3.22756	12.8376	9.61006	1_HSC	2_earlyLymphoid	NA
RPL10A	0	1	0	NA	down	NA	0	0	0	0	-3.4288	18.4489	15.0201	1_HSC	2_earlyLymphoid	NA
RPL27A	0	1	0	NA	down	NA	0	0	0	0	-3.45067	22.1077	18.657	1_HSC	2_earlyLymphoid	NA
RPS15	0	1	0	NA	down	NA	0	0	0	0	-3.54651	24.1186	20.5721	1_HSC	2_earlyLymphoid	NA
RPL35	0	1	0	NA	down	NA	0	0	0	0	-4.04672	16.7719	12.7251	1_HSC	2_earlyLymphoid	NA
RPL7A	0	1	0	NA	down	NA	0	0	0	0	-4.24399	17.2563	13.0123	1_HSC	2_earlyLymphoid	NA
RPL29	0	1	0	NA	down	NA	0	0	0	0	-4.30325	17.3044	13.0011	1_HSC	2_earlyLymphoid	NA
RPL41	0	1	0	NA	down	NA	0	0	0	0	-4.44134	39.1374	34.6961	1_HSC	2_earlyLymphoid	NA
RPS15A	0	1	0	NA	down	NA	0	0	0	0	-4.53243	29.3112	24.7788	1_HSC	2_earlyLymphoid	NA
RPL5	0	1	0	NA	down	0.795095	-0.000273224	0.000273224	0	0	-4.65983	17.3012	12.6413	1_HSC	2_earlyLymphoid	NA
RPS29	0	1	0	NA	down	NA	0	0	0	0	-4.68854	23.2003	18.5117	1_HSC	2_earlyLymphoid	NA
RPL35A	0	1	0	NA	down	NA	0	0	0	0	-4.70232	20.871	16.1687	1_HSC	2_earlyLymphoid	NA
RPS23	0	1	0	NA	down	NA	0	0	0	0	-4.79066	30.5929	25.8022	1_HSC	2_earlyLymphoid	NA
RPL37A	0	1	0	NA	down	NA	0	0	0	0	-4.99686	21.703	16.7061	1_HSC	2_earlyLymphoid	NA
RPL3	0	1	0	NA	down	NA	0	0	0	0	-5.08298	29.874	24.7911	1_HSC	2_earlyLymphoid	NA
RPL9	0	1	0	NA	down	NA	0	0	0	0	-5.20886	18.5787	13.3698	1_HSC	2_earlyLymphoid	NA
RPL21	0	1	0	NA	down	NA	0	0	0	0	-5.24076	30.9637	25.7229	1_HSC	2_earlyLymphoid	NA
RPL31	0	1	0	NA	down	NA	0	0	0	0	-5.65118	21.897	16.2458	1_HSC	2_earlyLymphoid	NA
RPS8	0	1	0	NA	down	NA	0	0	0	0	-5.86773	31.8443	25.9765	1_HSC	2_earlyLymphoid	NA
RPL18A	0	1	0	NA	down	NA	0	0	0	0	-6.0774	29.274	23.1966	1_HSC	2_earlyLymphoid	NA
RPL39	0	1	0	NA	down	NA	0	0	0	0	-6.18926	39.0429	32.8536	1_HSC	2_earlyLymphoid	NA
RPL11	0	1	0	NA	down	NA	0	0	0	0	-6.28966	27.4628	21.1732	1_HSC	2_earlyLymphoid	NA
RPL7	0	1	0	NA	down	NA	0	0	0	0	-6.36763	27.3609	20.9933	1_HSC	2_earlyLymphoid	NA
RPS12	0	1	0	NA	down	NA	0	0	0	0	-6.66976	41.3156	34.6458	1_HSC	2_earlyLymphoid	NA
RPS14	0	1	0	NA	down	NA	0	0	0	0	-6.78083	29.3328	22.552	1_HSC	2_earlyLymphoid	NA
RPS24	0	1	0	NA	down	NA	0	0	0	0	-6.82797	31.8984	25.0704	1_HSC	2_earlyLymphoid	NA
RPL36	0	1	0	NA	down	NA	0	0	0	0	-6.8809	19.1423	12.2615	1_HSC	2_earlyLymphoid	NA
RPL26	0	1	0	NA	down	NA	0	0	0	0	-6.90949	30.1877	23.2782	1_HSC	2_earlyLymphoid	NA
RPS3A	0	1	0	NA	down	NA	0	0	0	0	-6.97471	34.3568	27.3821	1_HSC	2_earlyLymphoid	NA
RPS3	0	1	0	NA	down	NA	0	0	0	0	-7.50364	31.3372	23.8335	1_HSC	2_earlyLymphoid	NA
RPL12	0	1	0	NA	down	NA	0	0	0	0	-7.53762	24.9164	17.3788	1_HSC	2_earlyLymphoid	NA
RPS2	0	1	0	NA	down	NA	0	0	0	0	-8.36692	41.5178	33.1508	1_HSC	2_earlyLymphoid	NA
RPL32	0	1	0	NA	down	NA	0	0	0	0	-8.8065	36.4467	27.6402	1_HSC	2_earlyLymphoid	NA
RPS4X	0	1	0	NA	down	NA	0	0	0	0	-11.2669	38.8066	27.5397	1_HSC	2_earlyLymphoid	NA
RPL34	0	1	0	NA	down	NA	0	0	0	0	-11.4292	41.3063	29.8771	1_HSC	2_earlyLymphoid	NA
RPS6	0	1	0	NA	down	NA	0	0	0	0	-11.8511	45.1249	33.2737	1_HSC	2_earlyLymphoid	NA
RPL13	0	1	0	NA	down	NA	0	0	0	0	-11.9304	42.5014	30.5709	1_HSC	2_earlyLymphoid	NA
RPS18	0	1	0	NA	down	NA	0	0	0	0	-16.4204	55.9511	39.5307	1_HSC	2_earlyLymphoid	NA

## Sheet: TBL_proBG2MS.vs.early
gene	DZ	DE	DM	sign_by_DZ	sign_by_DE	zero.pvalue.adj	zero_proportion_difference	c1.zero_proportion	c2.zero_proportion	nonzero.pvalue.adj	relative_difference	c1.maxmean	c2.maxmean	c1.celltype	c2.celltype	DM_nro_clusters_direction
PCNA	1	1	1	up	up	1.0135e-72	-0.533739	0.635754	0.102015	0	3.357	2.46933	5.82633	2_earlyLymphoid	3_proB_G2MS	down
HIST1H4C	1	1	1	up	up	1.62884e-59	-0.463131	0.675978	0.212846	0	14.2849	2.23448	16.5194	2_earlyLymphoid	3_proB_G2MS	down
IGJ	1	1	0	down	down	4.16153e-95	0.635778	0.305028	0.940806	3.60972e-05	-4.49805	6.88103	2.38298	2_earlyLymphoid	3_proB_G2MS	NA
SPINK2	1	1	0	down	down	3.24646e-96	0.614715	0.268156	0.882872	0	-3.72939	5.04122	1.31183	2_earlyLymphoid	3_proB_G2MS	NA
LSP1	1	1	0	down	down	1.65293e-63	0.487743	0.458101	0.945844	9.88065e-13	-1.86838	2.93814	1.06977	2_earlyLymphoid	3_proB_G2MS	NA
SELL	1	1	0	down	down	2.30213e-72	0.483405	0.315084	0.798489	0	-1.21497	2.53997	1.325	2_earlyLymphoid	3_proB_G2MS	NA
C19orf77	1	0	0	down	NA	3.4513e-60	0.482196	0.483799	0.965995	NA	-1.62771	1.62771	0	2_earlyLymphoid	3_proB_G2MS	NA
HCST	1	0	0	down	NA	1.71236e-61	0.479942	0.475978	0.955919	NA	-0.823028	1.96588	1.14286	2_earlyLymphoid	3_proB_G2MS	NA
CD44	1	0	0	down	NA	1.374e-60	0.452641	0.469274	0.921914	0.000510976	-0.499015	1.59579	1.09677	2_earlyLymphoid	3_proB_G2MS	NA
ICAM3	1	0	0	down	NA	3.725e-53	0.420827	0.516201	0.937028	0.00192295	-0.453441	1.47344	1.02	2_earlyLymphoid	3_proB_G2MS	NA
S100A4	1	1	0	down	down	8.91065e-52	0.394706	0.469274	0.86398	1.31093e-10	-1.12051	2.32421	1.2037	2_earlyLymphoid	3_proB_G2MS	NA
IRF2BP2	1	0	0	down	NA	5.64919e-47	0.374986	0.403352	0.778338	1.15508e-07	-0.462696	1.6161	1.15341	2_earlyLymphoid	3_proB_G2MS	NA
FTL	1	1	0	down	down	6.20577e-40	0.369787	0.0357542	0.405542	0	-2.78088	4.95249	2.17161	2_earlyLymphoid	3_proB_G2MS	NA
NREP	1	0	0	down	NA	4.03016e-46	0.353883	0.346369	0.700252	3.22029e-13	-0.470674	1.60513	1.13445	2_earlyLymphoid	3_proB_G2MS	NA
SERPINB1	1	0	0	down	NA	1.51714e-49	0.345979	0.38324	0.729219	1.1693e-10	-0.550244	1.74094	1.1907	2_earlyLymphoid	3_proB_G2MS	NA
AIF1	1	1	0	down	down	7.01111e-43	0.34161	0.0815642	0.423174	0	-1.81204	3.43431	1.62227	2_earlyLymphoid	3_proB_G2MS	NA
LGALS1	1	0	0	down	NA	1.5188e-37	0.340316	0.635754	0.976071	NA	-7.32822	7.32822	0	2_earlyLymphoid	3_proB_G2MS	NA
OCIAD2	1	0	0	down	NA	3.05636e-42	0.339227	0.50838	0.847607	0.784748	-0.120661	1.23636	1.1157	2_earlyLymphoid	3_proB_G2MS	NA
DSTN	1	0	0	down	NA	7.5443e-39	0.335836	0.49162	0.827456	0.00401584	-0.305896	1.41538	1.10949	2_earlyLymphoid	3_proB_G2MS	NA
RNF130	1	0	0	down	NA	3.41974e-42	0.325306	0.61676	0.942065	1	-0.127202	1.19242	1.06522	2_earlyLymphoid	3_proB_G2MS	NA
TSC22D1	1	0	0	down	NA	5.64919e-47	0.322586	0.585475	0.90806	0.0133595	-0.627183	1.84636	1.21918	2_earlyLymphoid	3_proB_G2MS	NA
STK17B	1	0	0	down	NA	8.45933e-32	0.322002	0.501676	0.823678	3.57341e-07	-0.493594	1.56502	1.07143	2_earlyLymphoid	3_proB_G2MS	NA
PRSS57	1	0	0	down	NA	8.85456e-39	0.316955	0.640223	0.957179	NA	-0.385093	1.38509	1	2_earlyLymphoid	3_proB_G2MS	NA
GLIPR1	1	0	0	down	NA	2.76422e-42	0.315412	0.637989	0.953401	NA	-0.153487	1.23457	1.08108	2_earlyLymphoid	3_proB_G2MS	NA
HOPX	1	0	0	down	NA	1.70253e-26	0.311712	0.678212	0.989924	NA	-2.10069	2.10069	0	2_earlyLymphoid	3_proB_G2MS	NA
SNHG8	1	0	0	down	NA	2.06509e-28	0.31066	0.283799	0.594458	3.02781e-10	-0.488527	1.87051	1.38199	2_earlyLymphoid	3_proB_G2MS	NA
SATB1	1	0	0	down	NA	3.85046e-43	0.305404	0.529609	0.835013	0.00409928	-0.318816	1.41805	1.09924	2_earlyLymphoid	3_proB_G2MS	NA
CST3	1	0	0	down	NA	1.2845e-36	0.303567	0.663687	0.967254	NA	-1.9103	1.9103	0	2_earlyLymphoid	3_proB_G2MS	NA
RNASET2	1	0	0	down	NA	1.29718e-27	0.303213	0.482682	0.785894	1.12817e-06	-0.366523	1.46652	1.1	2_earlyLymphoid	3_proB_G2MS	NA
FOS	1	1	0	down	down	1.93695e-28	0.300335	0.37095	0.671285	9.25856e-09	-1.29914	3.26465	1.96552	2_earlyLymphoid	3_proB_G2MS	NA
ANXA1	1	0	0	down	NA	5.74762e-38	0.298368	0.652514	0.950882	NA	-0.572595	1.64952	1.07692	2_earlyLymphoid	3_proB_G2MS	NA
FLT3	1	0	0	down	NA	7.75053e-43	0.297515	0.64581	0.943325	0.728003	-0.217525	1.23975	1.02222	2_earlyLymphoid	3_proB_G2MS	NA
ANKRD28	1	0	0	down	NA	7.73293e-29	0.294578	0.503911	0.798489	9.67264e-07	-0.498423	1.67342	1.175	2_earlyLymphoid	3_proB_G2MS	NA
SPNS3	1	0	0	down	NA	1.15968e-35	0.290586	0.680447	0.971033	NA	-1.33566	1.33566	0	2_earlyLymphoid	3_proB_G2MS	NA
RP11-620J15.3	1	0	0	down	NA	2.28061e-32	0.286496	0.450279	0.736776	3.82417e-05	-0.384156	1.61382	1.22967	2_earlyLymphoid	3_proB_G2MS	NA
RP11-347P5.1	1	0	0	down	NA	3.9075e-32	0.28492	0.64581	0.93073	0.0843059	-0.368913	1.44164	1.07273	2_earlyLymphoid	3_proB_G2MS	NA
TUBA1A	1	0	0	down	NA	4.16144e-27	0.278679	0.388827	0.667506	0.008543	-0.447233	1.99269	1.54545	2_earlyLymphoid	3_proB_G2MS	NA
FXYD5	1	1	0	down	down	2.99896e-25	0.277914	0.283799	0.561713	0	-1.03542	2.41186	1.37644	2_earlyLymphoid	3_proB_G2MS	NA
CTSW	1	0	0	down	NA	5.0135e-28	0.270636	0.711732	0.982368	NA	-1.38372	1.38372	0	2_earlyLymphoid	3_proB_G2MS	NA
ITGA4	1	0	0	down	NA	1.20577e-27	0.260186	0.52067	0.780856	0.00785875	-0.329676	1.48485	1.15517	2_earlyLymphoid	3_proB_G2MS	NA
NDUFS5	1	0	0	down	NA	4.80051e-23	0.258635	0.300559	0.559194	0.0401348	-0.247056	1.66134	1.41429	2_earlyLymphoid	3_proB_G2MS	NA
ZFAS1	1	1	0	down	down	3.02614e-25	0.257775	0.0759777	0.333753	0	-1.63522	3.31197	1.67675	2_earlyLymphoid	3_proB_G2MS	NA
HSH2D	1	0	0	down	NA	4.55462e-30	0.255827	0.724022	0.979849	NA	-1.24291	1.24291	0	2_earlyLymphoid	3_proB_G2MS	NA
IL2RG	1	0	0	down	NA	1.42579e-31	0.25287	0.572067	0.824937	0.660763	-0.142739	1.25065	1.10791	2_earlyLymphoid	3_proB_G2MS	NA
IRF8	1	0	0	down	NA	2.24754e-30	0.251705	0.69162	0.943325	NA	-1.69928	2.69928	1	2_earlyLymphoid	3_proB_G2MS	NA
TYROBP	1	0	0	down	NA	3.32647e-26	0.25024	0.729609	0.979849	NA	-1.6405	1.6405	0	2_earlyLymphoid	3_proB_G2MS	NA
RUNX2	1	0	0	down	NA	9.79673e-30	0.249103	0.72067	0.969773	NA	-1.572	1.572	0	2_earlyLymphoid	3_proB_G2MS	NA
GPX1	1	1	0	down	down	1.08289e-26	0.240408	0.0681564	0.308564	0	-2.19705	4.06954	1.8725	2_earlyLymphoid	3_proB_G2MS	NA
MIR142	1	0	0	down	NA	5.35318e-23	0.239648	0.53743	0.777078	0.00668544	-0.380251	1.62319	1.24294	2_earlyLymphoid	3_proB_G2MS	NA
VAMP8	1	0	0	down	NA	3.61141e-28	0.23916	0.21676	0.455919	0	-0.761191	2.2311	1.46991	2_earlyLymphoid	3_proB_G2MS	NA
RAB11FIP1	1	0	0	down	NA	6.23885e-24	0.227894	0.751955	0.979849	NA	-1.27027	1.27027	0	2_earlyLymphoid	3_proB_G2MS	NA
MAP3K8	1	0	0	down	NA	2.17814e-25	0.227388	0.70838	0.935768	0.0127779	-0.547442	1.56705	1.01961	2_earlyLymphoid	3_proB_G2MS	NA
TMIGD2	1	0	0	down	NA	3.94455e-29	0.226634	0.751955	0.978589	NA	-1.07658	1.07658	0	2_earlyLymphoid	3_proB_G2MS	NA
TMEM66	1	0	0	down	NA	1.09257e-18	0.226095	0.26257	0.488665	4.52703e-08	-0.518951	1.98939	1.47044	2_earlyLymphoid	3_proB_G2MS	NA
SOX4	1	1	0	down	down	3.68785e-23	0.224619	0.151955	0.376574	0	-2.71041	5.03162	2.32121	2_earlyLymphoid	3_proB_G2MS	NA
MAPKAPK3	1	0	0	down	NA	7.05787e-30	0.223571	0.688268	0.911839	1	-0.154173	1.16846	1.01429	2_earlyLymphoid	3_proB_G2MS	NA
TATDN1	1	0	0	down	NA	8.47318e-26	0.223247	0.665922	0.889169	1	-0.121085	1.14381	1.02273	2_earlyLymphoid	3_proB_G2MS	NA
SSR2	1	0	0	down	NA	5.02733e-18	0.219225	0.327374	0.546599	6.89691e-11	-0.393974	1.6412	1.24722	2_earlyLymphoid	3_proB_G2MS	NA
IGFBP7	1	0	0	down	NA	1.48843e-19	0.218171	0.289385	0.507557	1.52097e-09	-0.566183	2.01887	1.45269	2_earlyLymphoid	3_proB_G2MS	NA
TRAF3IP3	1	0	0	down	NA	9.40207e-31	0.216499	0.721788	0.938287	1	-0.123187	1.20482	1.08163	2_earlyLymphoid	3_proB_G2MS	NA
C10orf54	1	0	0	down	NA	1.47445e-30	0.216112	0.738547	0.95466	NA	-0.179487	1.17949	1	2_earlyLymphoid	3_proB_G2MS	NA
BST2	1	0	0	down	NA	3.14038e-21	0.215331	0.55419	0.769521	0.448496	-0.18304	1.30326	1.12022	2_earlyLymphoid	3_proB_G2MS	NA
MED13L	1	0	0	down	NA	3.42525e-23	0.213969	0.573184	0.787154	0.0817269	-0.194755	1.25393	1.05917	2_earlyLymphoid	3_proB_G2MS	NA
STARD4-AS1	1	0	0	down	NA	1.89145e-31	0.213779	0.690503	0.904282	1	-0.111106	1.1769	1.06579	2_earlyLymphoid	3_proB_G2MS	NA
PRELID1	1	0	0	down	NA	1.05429e-12	0.21367	0.49162	0.70529	1	-0.0814408	1.31648	1.23504	2_earlyLymphoid	3_proB_G2MS	NA
RNASE6	1	0	0	down	NA	3.69449e-28	0.209286	0.75419	0.963476	NA	-1.36818	1.36818	0	2_earlyLymphoid	3_proB_G2MS	NA
COMMD6	1	0	0	down	NA	1.4985e-18	0.209221	0.149721	0.358942	0	-0.697165	2.31406	1.6169	2_earlyLymphoid	3_proB_G2MS	NA
EVI2B	1	0	0	down	NA	2.55439e-24	0.208217	0.636872	0.845088	1	-0.0710444	1.32308	1.25203	2_earlyLymphoid	3_proB_G2MS	NA
DDIT4	1	0	0	down	NA	8.93562e-19	0.207285	0.589944	0.797229	0.0256085	-0.502192	1.80654	1.30435	2_earlyLymphoid	3_proB_G2MS	NA
TIMP1	1	0	0	down	NA	7.5845e-25	0.206096	0.768715	0.974811	NA	-1.17874	1.17874	0	2_earlyLymphoid	3_proB_G2MS	NA
CAPG	1	0	0	down	NA	5.74998e-23	0.20601	0.510615	0.716625	1.47116e-06	-0.40417	1.57306	1.16889	2_earlyLymphoid	3_proB_G2MS	NA
CORO1A	1	0	0	down	NA	2.31336e-20	0.205301	0.148603	0.353904	6.48902e-12	-0.747395	2.74934	2.00195	2_earlyLymphoid	3_proB_G2MS	NA
DDAH2	1	0	0	down	NA	1.4e-19	0.205245	0.405587	0.610831	0.294834	-0.226543	1.68609	1.45955	2_earlyLymphoid	3_proB_G2MS	NA
CTSS	1	0	0	down	NA	6.20472e-21	0.204316	0.64581	0.850126	1	-0.0611033	1.17035	1.10924	2_earlyLymphoid	3_proB_G2MS	NA
EMP3	1	0	0	down	NA	1.76245e-21	0.203925	0.731844	0.935768	1	-0.136029	1.3125	1.17647	2_earlyLymphoid	3_proB_G2MS	NA
CTSD	1	0	0	down	NA	4.39665e-24	0.203214	0.726257	0.929471	NA	-0.220408	1.22041	1	2_earlyLymphoid	3_proB_G2MS	NA
PNISR	1	0	0	down	NA	8.59533e-20	0.202817	0.237989	0.440806	1.22352e-05	-0.438225	2.10264	1.66441	2_earlyLymphoid	3_proB_G2MS	NA
NEGR1	1	0	0	down	NA	7.26254e-26	0.201607	0.763128	0.964736	NA	-1.16981	1.16981	0	2_earlyLymphoid	3_proB_G2MS	NA
HSD17B11	1	0	0	down	NA	6.87949e-17	0.200791	0.489385	0.690176	0.817098	-0.100221	1.49453	1.39431	2_earlyLymphoid	3_proB_G2MS	NA
SRGN	1	0	0	down	NA	3.01197e-21	0.199484	0.607821	0.807305	0.00138957	-0.373219	1.48433	1.11111	2_earlyLymphoid	3_proB_G2MS	NA
SPN	1	0	0	down	NA	1.99101e-25	0.198465	0.659218	0.857683	1	-0.116089	1.18689	1.0708	2_earlyLymphoid	3_proB_G2MS	NA
PLD4	1	0	0	down	NA	3.65908e-24	0.196996	0.76648	0.963476	NA	-1.51675	1.51675	0	2_earlyLymphoid	3_proB_G2MS	NA
ACY3	1	1	0	down	down	4.95858e-21	0.195697	0.746369	0.942065	0.000127077	-1.85051	2.87225	1.02174	2_earlyLymphoid	3_proB_G2MS	NA
CD48	1	0	0	down	NA	1.83194e-22	0.19527	0.743017	0.938287	1	-0.0952972	1.15652	1.06122	2_earlyLymphoid	3_proB_G2MS	NA
RSL1D1	1	0	0	down	NA	3.39967e-12	0.194561	0.381006	0.575567	0.0751016	-0.209692	1.5361	1.32641	2_earlyLymphoid	3_proB_G2MS	NA
OSTC	1	0	0	down	NA	1.41823e-15	0.190606	0.290503	0.481108	0.00132859	-0.258489	1.60315	1.34466	2_earlyLymphoid	3_proB_G2MS	NA
APEX1	1	0	0	down	NA	4.37882e-16	0.189954	0.315084	0.505038	0.000387249	-0.313787	1.7031	1.38931	2_earlyLymphoid	3_proB_G2MS	NA
CD37	1	0	0	down	NA	3.21153e-13	0.189467	0.637989	0.827456	1.0082e-06	-0.744818	1.9784	1.23358	2_earlyLymphoid	3_proB_G2MS	NA
BEX2	1	0	0	down	NA	1.44139e-23	0.18891	0.782123	0.971033	NA	-1.08718	1.08718	0	2_earlyLymphoid	3_proB_G2MS	NA
GPSM3	1	0	0	down	NA	3.87904e-16	0.188172	0.548603	0.736776	0.215136	-0.159754	1.2698	1.11005	2_earlyLymphoid	3_proB_G2MS	NA
C9orf89	1	0	0	down	NA	2.66588e-17	0.187781	0.634637	0.822418	1	-0.155508	1.24771	1.0922	2_earlyLymphoid	3_proB_G2MS	NA
C1orf228	1	0	0	down	NA	1.0284e-16	0.187245	0.432402	0.619647	1.15979e-09	-0.397429	1.56299	1.16556	2_earlyLymphoid	3_proB_G2MS	NA
C1orf63	1	0	0	down	NA	9.54431e-17	0.186012	0.660335	0.846348	0.410247	-0.19931	1.28947	1.09016	2_earlyLymphoid	3_proB_G2MS	NA
DHRS7	1	0	0	down	NA	1.58046e-25	0.185602	0.736313	0.921914	NA	-0.0847458	1.08475	1	2_earlyLymphoid	3_proB_G2MS	NA
CD63	1	0	0	down	NA	3.7935e-14	0.181974	0.598883	0.780856	0.14618	-0.22838	1.32033	1.09195	2_earlyLymphoid	3_proB_G2MS	NA
TSPO	1	0	0	down	NA	3.79162e-15	0.181934	0.578771	0.760705	1	-0.128745	1.30769	1.17895	2_earlyLymphoid	3_proB_G2MS	NA
CCND2	1	0	0	down	NA	1.58543e-21	0.181926	0.717318	0.899244	1	-0.0422925	1.14229	1.1	2_earlyLymphoid	3_proB_G2MS	NA
GSTK1	1	0	0	down	NA	4.99666e-14	0.181125	0.522905	0.70403	0.287418	-0.13338	1.29508	1.1617	2_earlyLymphoid	3_proB_G2MS	NA
LRRC26	1	0	0	down	NA	3.33055e-25	0.180745	0.757542	0.938287	1	-0.0789993	1.26267	1.18367	2_earlyLymphoid	3_proB_G2MS	NA
LINC00493	1	0	0	down	NA	2.41205e-15	0.179704	0.511732	0.691436	0.0356679	-0.192845	1.31121	1.11837	2_earlyLymphoid	3_proB_G2MS	NA
ACAP1	1	0	0	down	NA	3.01738e-19	0.178187	0.73743	0.915617	1	-0.163735	1.20851	1.04478	2_earlyLymphoid	3_proB_G2MS	NA
LUC7L3	1	0	0	down	NA	1.27342e-13	0.177576	0.425698	0.603275	0.707856	-0.139633	1.48249	1.34286	2_earlyLymphoid	3_proB_G2MS	NA
FNBP1	1	0	0	down	NA	7.07912e-14	0.176253	0.464804	0.641058	0.0728068	-0.181116	1.40919	1.22807	2_earlyLymphoid	3_proB_G2MS	NA
ARL4C	1	0	0	down	NA	3.25859e-22	0.175624	0.786592	0.962217	NA	-1.23037	1.23037	0	2_earlyLymphoid	3_proB_G2MS	NA
FMNL1	1	0	0	down	NA	1.08587e-14	0.175163	0.693855	0.869018	1	-0.115174	1.18248	1.06731	2_earlyLymphoid	3_proB_G2MS	NA
LGMN	1	0	0	down	NA	3.18739e-22	0.174507	0.787709	0.962217	NA	-1.15789	1.15789	0	2_earlyLymphoid	3_proB_G2MS	NA
CYTH4	1	0	0	down	NA	6.6775e-19	0.173856	0.812291	0.986146	NA	-1.27976	1.27976	0	2_earlyLymphoid	3_proB_G2MS	NA
KLF6	1	0	0	down	NA	1.67657e-11	0.171812	0.340782	0.512594	0.001246	-0.560286	2.23729	1.677	2_earlyLymphoid	3_proB_G2MS	NA
EPB41L4A-AS1	1	0	0	down	NA	8.71774e-13	0.170291	0.635754	0.806045	0.456385	-0.150147	1.20859	1.05844	2_earlyLymphoid	3_proB_G2MS	NA
LAIR1	1	0	0	down	NA	6.43566e-19	0.169502	0.589944	0.759446	0.123228	-0.233591	1.34877	1.11518	2_earlyLymphoid	3_proB_G2MS	NA
RILPL2	1	0	0	down	NA	3.07175e-18	0.168724	0.692737	0.861461	1	-0.0545455	1.10909	1.05455	2_earlyLymphoid	3_proB_G2MS	NA
ARRDC3	1	0	0	down	NA	1.54881e-12	0.167753	0.625698	0.793451	1	-0.131908	1.24776	1.11585	2_earlyLymphoid	3_proB_G2MS	NA
MDH2	1	0	0	down	NA	3.31928e-10	0.167658	0.506145	0.673804	1	-0.10188	1.26018	1.1583	2_earlyLymphoid	3_proB_G2MS	NA
BIN2	1	0	0	down	NA	5.26939e-15	0.166887	0.826816	0.993703	NA	-1.12258	1.12258	0	2_earlyLymphoid	3_proB_G2MS	NA
MYADM	1	0	0	down	NA	7.18834e-18	0.166533	0.64581	0.812343	1	-0.12902	1.39748	1.26846	2_earlyLymphoid	3_proB_G2MS	NA
SSR4	1	0	0	down	NA	2.34079e-09	0.165882	0.313966	0.479849	0.00238134	-0.224263	1.62378	1.39952	2_earlyLymphoid	3_proB_G2MS	NA
KIAA0125	1	1	0	down	down	5.50612e-11	0.165191	0.318436	0.483627	0	-1.37301	2.78033	1.40732	2_earlyLymphoid	3_proB_G2MS	NA
PLP2	1	0	0	down	NA	1.96857e-10	0.165139	0.506145	0.671285	0.000967288	-0.379735	1.64027	1.26054	2_earlyLymphoid	3_proB_G2MS	NA
SLC9A3R1	1	0	0	down	NA	9.55931e-20	0.165024	0.732961	0.897985	1	-0.0970608	1.14644	1.04938	2_earlyLymphoid	3_proB_G2MS	NA
MAP1A	1	0	0	down	NA	3.74748e-24	0.16498	0.782123	0.947103	1	-0.0582418	1.08205	1.02381	2_earlyLymphoid	3_proB_G2MS	NA
MGST2	1	0	0	down	NA	3.87472e-17	0.16491	0.603352	0.768262	1	-0.141412	1.2338	1.09239	2_earlyLymphoid	3_proB_G2MS	NA
LST1	1	0	0	down	NA	4.42389e-11	0.164358	0.321788	0.486146	0.0102431	-0.375812	2.19934	1.82353	2_earlyLymphoid	3_proB_G2MS	NA
SH3KBP1	1	0	0	down	NA	6.24084e-11	0.164066	0.458101	0.622166	0.00285903	-0.218557	1.41856	1.2	2_earlyLymphoid	3_proB_G2MS	NA
MIR181A1HG	1	0	0	down	NA	7.87242e-11	0.163915	0.595531	0.759446	0.0461637	-0.187787	1.38674	1.19895	2_earlyLymphoid	3_proB_G2MS	NA
LCP1	1	0	0	down	NA	3.55699e-10	0.163556	0.483799	0.647355	0.0161864	-0.224351	1.43506	1.21071	2_earlyLymphoid	3_proB_G2MS	NA
UFC1	1	0	0	down	NA	2.45552e-11	0.163095	0.391061	0.554156	0.0394983	-0.186684	1.45505	1.26836	2_earlyLymphoid	3_proB_G2MS	NA
SEPT6	1	0	0	down	NA	1.81065e-10	0.162487	0.36648	0.528967	3.9368e-06	-0.297621	1.58907	1.29144	2_earlyLymphoid	3_proB_G2MS	NA
CUTA	1	0	0	down	NA	1.92845e-09	0.161713	0.4	0.561713	1	-0.0590927	1.51024	1.45115	2_earlyLymphoid	3_proB_G2MS	NA
SSBP4	1	0	0	down	NA	1.77434e-17	0.160839	0.739665	0.900504	1	-0.0691041	1.09442	1.02532	2_earlyLymphoid	3_proB_G2MS	NA
IDS	1	0	0	down	NA	6.70721e-18	0.160369	0.785475	0.945844	1	-0.0993217	1.14583	1.04651	2_earlyLymphoid	3_proB_G2MS	NA
DYNLT1	1	0	0	down	NA	2.72677e-17	0.159907	0.692737	0.852645	1	-0.133085	1.16727	1.03419	2_earlyLymphoid	3_proB_G2MS	NA
ALKBH7	1	0	0	down	NA	2.54276e-09	0.159853	0.593296	0.753149	1	-0.0973312	1.18407	1.08673	2_earlyLymphoid	3_proB_G2MS	NA
SLC43A2	1	0	0	down	NA	1.90238e-17	0.159394	0.787709	0.947103	1	-0.149875	1.17368	1.02381	2_earlyLymphoid	3_proB_G2MS	NA
ERGIC3	1	0	0	down	NA	2.31653e-09	0.159312	0.460335	0.619647	0.0310636	-0.162793	1.30849	1.1457	2_earlyLymphoid	3_proB_G2MS	NA
LY6E	1	0	0	down	NA	9.82194e-09	0.159	0.586592	0.745592	1	-0.0453037	1.33243	1.28713	2_earlyLymphoid	3_proB_G2MS	NA
FIS1	1	0	0	down	NA	1.35479e-11	0.157638	0.605587	0.763224	1	-0.108914	1.2153	1.10638	2_earlyLymphoid	3_proB_G2MS	NA
NDFIP1	1	0	0	down	NA	2.43543e-21	0.156287	0.773184	0.929471	1	0.00246305	1.06897	1.07143	2_earlyLymphoid	3_proB_G2MS	NA
IL18	1	0	0	down	NA	1.0972e-20	0.15539	0.815642	0.971033	NA	-1.07879	1.07879	0	2_earlyLymphoid	3_proB_G2MS	NA
C16orf54	1	0	0	down	NA	3.54856e-21	0.153401	0.8	0.953401	NA	-0.217877	1.21788	1	2_earlyLymphoid	3_proB_G2MS	NA
RPL22L1	1	0	0	down	NA	5.13691e-07	0.153284	0.38324	0.536524	0.00272647	-0.316123	1.83514	1.51902	2_earlyLymphoid	3_proB_G2MS	NA
PTGER4	1	0	0	down	NA	7.45243e-20	0.152567	0.803352	0.955919	NA	-0.113474	1.14205	1.02857	2_earlyLymphoid	3_proB_G2MS	NA
AKR1C3	1	0	0	down	NA	1.1603e-19	0.152513	0.703911	0.856423	1	-0.113406	1.16604	1.05263	2_earlyLymphoid	3_proB_G2MS	NA
N4BP2L2	1	0	0	down	NA	2.59549e-11	0.152138	0.512849	0.664987	0.0817269	-0.238825	1.43807	1.19925	2_earlyLymphoid	3_proB_G2MS	NA
NPM3	1	0	0	down	NA	5.68307e-13	0.152086	0.700559	0.852645	1	-0.0249075	1.09328	1.06838	2_earlyLymphoid	3_proB_G2MS	NA
RGS1	1	0	0	down	NA	1.49409e-18	0.150656	0.827933	0.978589	NA	-1.41558	1.41558	0	2_earlyLymphoid	3_proB_G2MS	NA
RHOF	1	0	0	down	NA	1.58543e-21	0.15021	0.814525	0.964736	NA	-1.10241	1.10241	0	2_earlyLymphoid	3_proB_G2MS	NA
ALDH2	1	0	0	down	NA	5.26939e-15	0.149985	0.842458	0.992443	NA	-1.1844	1.1844	0	2_earlyLymphoid	3_proB_G2MS	NA
C1QTNF4	1	0	0	down	NA	5.01733e-13	0.149871	0.712849	0.86272	0.000134537	-0.739264	1.8677	1.12844	2_earlyLymphoid	3_proB_G2MS	NA
CNN2	1	0	0	down	NA	1.66721e-14	0.149843	0.841341	0.991184	NA	-1.19718	1.19718	0	2_earlyLymphoid	3_proB_G2MS	NA
ERCC1	1	0	0	down	NA	1.14934e-13	0.149023	0.636872	0.785894	0.776372	-0.137285	1.17846	1.04118	2_earlyLymphoid	3_proB_G2MS	NA
TES	1	0	0	down	NA	1.04231e-19	0.148465	0.781006	0.929471	1	-0.125	1.14286	1.01786	2_earlyLymphoid	3_proB_G2MS	NA
ITM2C	1	0	0	down	NA	7.12933e-09	0.145795	0.27486	0.420655	1.71678e-06	-0.583145	2.13097	1.54783	2_earlyLymphoid	3_proB_G2MS	NA
UMODL1	1	0	0	down	NA	2.97514e-20	0.144643	0.830168	0.974811	NA	-1.15132	1.15132	0	2_earlyLymphoid	3_proB_G2MS	NA
FCER1G	1	0	0	down	NA	1.77051e-15	0.144114	0.84581	0.989924	NA	-1.23188	1.23188	0	2_earlyLymphoid	3_proB_G2MS	NA
CYTL1	1	0	0	down	NA	1.81282e-17	0.144055	0.815642	0.959698	NA	-0.254545	1.25455	1	2_earlyLymphoid	3_proB_G2MS	NA
MIR24-2	1	0	0	down	NA	6.71809e-14	0.143423	0.850279	0.993703	NA	-1.26866	1.26866	0	2_earlyLymphoid	3_proB_G2MS	NA
PTPN6	1	0	0	down	NA	3.52904e-16	0.14308	0.817877	0.960957	NA	-0.159509	1.15951	1	2_earlyLymphoid	3_proB_G2MS	NA
SNX3	1	0	0	down	NA	1.36243e-09	0.142845	0.340782	0.483627	0.309972	-0.185242	1.61695	1.43171	2_earlyLymphoid	3_proB_G2MS	NA
DNAJC4	1	0	0	down	NA	1.34706e-14	0.142619	0.72514	0.867758	1	-0.139373	1.18699	1.04762	2_earlyLymphoid	3_proB_G2MS	NA
ITGB7	1	0	0	down	NA	5.81048e-15	0.142429	0.842458	0.984887	NA	-1.2695	1.2695	0	2_earlyLymphoid	3_proB_G2MS	NA
GSTP1	1	1	0	down	down	4.0169e-14	0.141946	0.0960894	0.238035	0	-1.6501	3.822	2.1719	2_earlyLymphoid	3_proB_G2MS	NA
PHPT1	1	0	0	down	NA	1.46324e-10	0.141643	0.727374	0.869018	1	-0.0250631	1.18852	1.16346	2_earlyLymphoid	3_proB_G2MS	NA
IL7R	1	0	0	down	NA	2.70585e-17	0.140261	0.736313	0.876574	0.823431	-0.262366	1.36441	1.10204	2_earlyLymphoid	3_proB_G2MS	NA
RAB37	1	0	0	down	NA	9.16165e-21	0.140012	0.823464	0.963476	NA	-1.12025	1.12025	0	2_earlyLymphoid	3_proB_G2MS	NA
TOP1MT	1	0	0	down	NA	4.7806e-18	0.13991	0.842458	0.982368	NA	-1.06383	1.06383	0	2_earlyLymphoid	3_proB_G2MS	NA
C4orf48	1	0	0	down	NA	9.58246e-16	0.139487	0.769832	0.90932	1	-0.0686354	1.08252	1.01389	2_earlyLymphoid	3_proB_G2MS	NA
NPDC1	1	0	0	down	NA	2.85876e-11	0.139238	0.856983	0.996222	NA	-1.14062	1.14062	0	2_earlyLymphoid	3_proB_G2MS	NA
SEPW1	1	0	0	down	NA	2.49128e-15	0.138635	0.763128	0.901763	1	-0.0970005	1.12264	1.02564	2_earlyLymphoid	3_proB_G2MS	NA
PYCARD	1	0	0	down	NA	5.06324e-11	0.138466	0.534078	0.672544	0.851612	-0.118493	1.30695	1.18846	2_earlyLymphoid	3_proB_G2MS	NA
C19orf70	1	0	0	down	NA	4.56455e-09	0.138335	0.681564	0.819899	1	-0.0739541	1.15088	1.07692	2_earlyLymphoid	3_proB_G2MS	NA
LGALS9	1	0	0	down	NA	6.47697e-12	0.138118	0.57095	0.709068	1	-0.0204613	1.21094	1.19048	2_earlyLymphoid	3_proB_G2MS	NA
TNFSF13B	1	0	0	down	NA	2.12569e-17	0.138023	0.807821	0.945844	1	-0.0872093	1.13372	1.04651	2_earlyLymphoid	3_proB_G2MS	NA
NEAT1	1	0	0	down	NA	1.94307e-06	0.137558	0.427933	0.565491	0.0126254	-0.346445	1.96094	1.61449	2_earlyLymphoid	3_proB_G2MS	NA
LTA4H	1	0	0	down	NA	1.77492e-10	0.136855	0.640223	0.777078	1	-0.104695	1.18944	1.08475	2_earlyLymphoid	3_proB_G2MS	NA
H1F0	1	0	0	down	NA	2.26432e-14	0.134607	0.850279	0.984887	NA	-1.27612	1.27612	0	2_earlyLymphoid	3_proB_G2MS	NA
NKG7	1	0	0	down	NA	2.19942e-14	0.134165	0.767598	0.901763	1	-0.107372	1.19712	1.08974	2_earlyLymphoid	3_proB_G2MS	NA
GAPT	1	0	0	down	NA	1.63743e-17	0.13319	0.769832	0.903023	1	-0.137372	1.18932	1.05195	2_earlyLymphoid	3_proB_G2MS	NA
CYSLTR1	1	0	0	down	NA	3.25951e-15	0.132945	0.787709	0.920655	1	-0.18939	1.20526	1.01587	2_earlyLymphoid	3_proB_G2MS	NA
C6orf48	1	0	0	down	NA	2.99034e-09	0.132857	0.242458	0.375315	0.0229294	-0.333595	2.00295	1.66935	2_earlyLymphoid	3_proB_G2MS	NA
RPL36AL	1	0	0	down	NA	8.89624e-07	0.132699	0.162011	0.29471	7.45369e-06	-0.427071	2.136	1.70893	2_earlyLymphoid	3_proB_G2MS	NA
TMED10	1	0	0	down	NA	2.71668e-08	0.132615	0.547486	0.680101	0.0140252	-0.185593	1.3037	1.11811	2_earlyLymphoid	3_proB_G2MS	NA
LY96	1	0	0	down	NA	2.85839e-17	0.131804	0.848045	0.979849	NA	-1.09559	1.09559	0	2_earlyLymphoid	3_proB_G2MS	NA
IFI27L2	1	0	0	down	NA	2.55521e-15	0.131402	0.785475	0.916877	1	-0.0577652	1.07292	1.01515	2_earlyLymphoid	3_proB_G2MS	NA
FRMD4B	1	0	0	down	NA	1.50764e-16	0.131137	0.793296	0.924433	1	-0.0423423	1.07568	1.03333	2_earlyLymphoid	3_proB_G2MS	NA
RPL17	1	0	0	down	NA	1.00357e-07	0.130911	0.177654	0.308564	1.13026e-05	-0.526511	2.31522	1.78871	2_earlyLymphoid	3_proB_G2MS	NA
MAP7	1	0	0	down	NA	6.28014e-19	0.130525	0.837989	0.968514	NA	-1.04138	1.04138	0	2_earlyLymphoid	3_proB_G2MS	NA
HOXA10	1	0	0	down	NA	1.02926e-12	0.130387	0.767598	0.897985	1	-0.0563865	1.10577	1.04938	2_earlyLymphoid	3_proB_G2MS	NA
PRAM1	1	0	0	down	NA	1.6514e-11	0.130158	0.864804	0.994962	NA	-1.08264	1.08264	0	2_earlyLymphoid	3_proB_G2MS	NA
WAPAL	1	0	0	down	NA	1.168e-17	0.129712	0.851397	0.981108	NA	-1.07519	1.07519	0	2_earlyLymphoid	3_proB_G2MS	NA
MATK	1	0	0	down	NA	2.17084e-14	0.129692	0.841341	0.971033	NA	-1.11268	1.11268	0	2_earlyLymphoid	3_proB_G2MS	NA
CLNS1A	1	0	0	down	NA	1.23915e-08	0.129674	0.47486	0.604534	1	-0.0685459	1.28511	1.21656	2_earlyLymphoid	3_proB_G2MS	NA
CD53	1	0	0	down	NA	2.99719e-11	0.129011	0.350838	0.479849	1	-0.0936725	1.5852	1.49153	2_earlyLymphoid	3_proB_G2MS	NA
TMEM219	1	0	0	down	NA	2.45981e-12	0.127955	0.669274	0.797229	1	-0.0589642	1.11486	1.0559	2_earlyLymphoid	3_proB_G2MS	NA
RSL24D1	1	0	0	down	NA	4.81459e-08	0.127843	0.18324	0.311083	3.06255e-06	-0.429914	2.06977	1.63985	2_earlyLymphoid	3_proB_G2MS	NA
SMIM19	1	0	0	down	NA	2.2937e-13	0.127706	0.756425	0.884131	1	-0.045373	1.07798	1.03261	2_earlyLymphoid	3_proB_G2MS	NA
NGFRAP1	1	0	0	down	NA	3.05278e-08	0.127474	0.56648	0.693955	1	-0.0942472	1.30412	1.20988	2_earlyLymphoid	3_proB_G2MS	NA
TRAPPC6A	1	0	0	down	NA	6.32923e-10	0.126735	0.689385	0.816121	1	-0.0527742	1.10072	1.04795	2_earlyLymphoid	3_proB_G2MS	NA
EVL	1	0	0	down	NA	5.72428e-09	0.126377	0.577654	0.70403	0.790294	-0.179804	1.39683	1.21702	2_earlyLymphoid	3_proB_G2MS	NA
RP11-356I2.4	1	0	0	down	NA	6.39146e-17	0.126182	0.764246	0.890428	1	-0.139565	1.20853	1.06897	2_earlyLymphoid	3_proB_G2MS	NA
ODF2L	1	0	0	down	NA	2.06264e-15	0.125839	0.731844	0.857683	1	-0.0594027	1.1125	1.0531	2_earlyLymphoid	3_proB_G2MS	NA
FOSB	1	0	0	down	NA	5.80563e-08	0.125658	0.710615	0.836272	1	-0.0859816	1.35521	1.26923	2_earlyLymphoid	3_proB_G2MS	NA
PIK3R1	1	0	0	down	NA	8.32382e-07	0.124853	0.585475	0.710327	0.608924	-0.164667	1.33423	1.16957	2_earlyLymphoid	3_proB_G2MS	NA
SDK2	1	0	0	down	NA	8.17239e-15	0.12437	0.839106	0.963476	NA	-1.04167	1.04167	0	2_earlyLymphoid	3_proB_G2MS	NA
CTSC	1	0	0	down	NA	8.19893e-13	0.124335	0.749721	0.874055	1	-0.1575	1.1875	1.03	2_earlyLymphoid	3_proB_G2MS	NA
GNA15	1	0	0	down	NA	1.29168e-10	0.124031	0.73743	0.861461	1	-0.130948	1.21277	1.08182	2_earlyLymphoid	3_proB_G2MS	NA
TMEM147	1	0	0	down	NA	1.7309e-08	0.123628	0.67486	0.798489	1	-0.0274699	1.09622	1.06875	2_earlyLymphoid	3_proB_G2MS	NA
AMICA1	1	0	0	down	NA	4.72731e-14	0.122459	0.863687	0.986146	NA	-1.14754	1.14754	0	2_earlyLymphoid	3_proB_G2MS	NA
MCL1	1	0	0	down	NA	2.48392e-12	0.122262	0.763128	0.88539	0.699054	-0.232791	1.28774	1.05495	2_earlyLymphoid	3_proB_G2MS	NA
ITGB2	1	0	0	down	NA	3.70037e-12	0.122017	0.781006	0.903023	NA	-0.117347	1.11735	1	2_earlyLymphoid	3_proB_G2MS	NA
CYBA	1	0	0	down	NA	5.97952e-07	0.121305	0.131844	0.253149	4.21964e-06	-0.546233	2.82111	2.27487	2_earlyLymphoid	3_proB_G2MS	NA
ERP29	1	0	0	down	NA	5.54159e-07	0.12115	0.338547	0.459698	7.1799e-05	-0.363936	1.85811	1.49417	2_earlyLymphoid	3_proB_G2MS	NA
CLIC1	1	0	0	down	NA	1.41706e-11	0.12106	0.149721	0.270781	0.588898	-0.0537948	2.22996	2.17617	2_earlyLymphoid	3_proB_G2MS	NA
C1orf162	1	0	0	down	NA	1.90964e-16	0.120734	0.840223	0.960957	NA	-0.058651	1.09091	1.03226	2_earlyLymphoid	3_proB_G2MS	NA
TAGLN2	1	0	0	down	NA	0.000232649	0.119887	0.407821	0.527708	0.000220995	-0.391094	1.81509	1.424	2_earlyLymphoid	3_proB_G2MS	NA
C9orf16	1	0	0	down	NA	1.93386e-06	0.119867	0.397765	0.517632	0.724421	-0.157787	1.42672	1.26893	2_earlyLymphoid	3_proB_G2MS	NA
TADA3	1	0	0	down	NA	1.44234e-18	0.119842	0.813408	0.933249	NA	-0.0538922	1.05389	1	2_earlyLymphoid	3_proB_G2MS	NA
HOXA9	1	0	0	down	NA	5.89751e-14	0.119557	0.811173	0.93073	NA	-0.230769	1.23077	1	2_earlyLymphoid	3_proB_G2MS	NA
DUSP10	1	0	0	down	NA	1.9254e-15	0.118357	0.841341	0.959698	NA	-0.137764	1.16901	1.03125	2_earlyLymphoid	3_proB_G2MS	NA
FAM162A	1	0	0	down	NA	1.63995e-10	0.118097	0.779888	0.897985	1	-0.0869838	1.11168	1.02469	2_earlyLymphoid	3_proB_G2MS	NA
FYB	1	0	0	down	NA	5.50629e-13	0.117808	0.846927	0.964736	NA	-1.24818	1.24818	0	2_earlyLymphoid	3_proB_G2MS	NA
HERPUD1	1	0	0	down	NA	3.63171e-09	0.117797	0.698324	0.816121	0.270616	-0.258752	1.38889	1.13014	2_earlyLymphoid	3_proB_G2MS	NA
QPRT	1	0	0	down	NA	3.5653e-17	0.117769	0.826816	0.944584	1	-0.0156891	1.08387	1.06818	2_earlyLymphoid	3_proB_G2MS	NA
RASAL3	1	0	0	down	NA	6.67413e-17	0.117323	0.813408	0.93073	NA	-0.0598802	1.05988	1	2_earlyLymphoid	3_proB_G2MS	NA
TXNIP	1	0	0	down	NA	0.000135832	0.11683	0.562011	0.678841	0.760001	-0.316006	1.90816	1.59216	2_earlyLymphoid	3_proB_G2MS	NA
MAN1A1	1	0	0	down	NA	1.97767e-14	0.116817	0.769832	0.88665	1	-0.133118	1.15534	1.02222	2_earlyLymphoid	3_proB_G2MS	NA
IL3RA	1	0	0	down	NA	1.20188e-12	0.116466	0.875978	0.992443	NA	-1.17117	1.17117	0	2_earlyLymphoid	3_proB_G2MS	NA
FAM129C	1	0	0	down	NA	1.55154e-12	0.116229	0.755307	0.871537	1	-0.10744	1.20548	1.09804	2_earlyLymphoid	3_proB_G2MS	NA
LYRM5	1	0	0	down	NA	2.01961e-14	0.116186	0.804469	0.920655	1	0.00761905	1.04	1.04762	2_earlyLymphoid	3_proB_G2MS	NA
HIST1H2AC	1	0	0	down	NA	8.76804e-12	0.116083	0.823464	0.939547	1	-0.27558	1.37975	1.10417	2_earlyLymphoid	3_proB_G2MS	NA
RGL4	1	0	0	down	NA	1.42659e-11	0.115965	0.763128	0.879093	1	-0.189858	1.37736	1.1875	2_earlyLymphoid	3_proB_G2MS	NA
ABHD14B	1	0	0	down	NA	3.55699e-10	0.115538	0.759777	0.875315	1	-0.0914259	1.11163	1.0202	2_earlyLymphoid	3_proB_G2MS	NA
POLR1D	1	0	0	down	NA	3.1995e-06	0.115172	0.430168	0.54534	1	-0.0302428	1.32941	1.29917	2_earlyLymphoid	3_proB_G2MS	NA
FKBP11	1	0	0	down	NA	4.40688e-13	0.114681	0.822346	0.937028	1	-0.0594969	1.1195	1.06	2_earlyLymphoid	3_proB_G2MS	NA
MGLL	1	0	0	down	NA	1.95021e-09	0.114657	0.881564	0.996222	NA	-1.03774	1.03774	0	2_earlyLymphoid	3_proB_G2MS	NA
DTD1	1	0	0	down	NA	1.0964e-14	0.114192	0.858101	0.972292	NA	-1.01575	1.01575	0	2_earlyLymphoid	3_proB_G2MS	NA
EIF2A	1	0	0	down	NA	1.31974e-06	0.113944	0.588827	0.702771	1	-0.0621315	1.21467	1.15254	2_earlyLymphoid	3_proB_G2MS	NA
ISYNA1	1	0	0	down	NA	1.70863e-11	0.113868	0.835754	0.949622	1	-0.0520408	1.10204	1.05	2_earlyLymphoid	3_proB_G2MS	NA
NUDT8	1	0	0	down	NA	6.23552e-14	0.113584	0.83352	0.947103	1	-0.0902844	1.11409	1.02381	2_earlyLymphoid	3_proB_G2MS	NA
BCL2	1	0	0	down	NA	2.2417e-14	0.113157	0.830168	0.943325	1	-0.122515	1.14474	1.02222	2_earlyLymphoid	3_proB_G2MS	NA
SAMHD1	1	0	0	down	NA	1.94851e-11	0.112972	0.878212	0.991184	NA	-1.36697	1.36697	0	2_earlyLymphoid	3_proB_G2MS	NA
BAALC	1	0	0	down	NA	4.19932e-08	0.112372	0.715084	0.827456	1	-0.098898	1.21569	1.11679	2_earlyLymphoid	3_proB_G2MS	NA
DUSP6	1	0	0	down	NA	3.00003e-12	0.111922	0.77095	0.882872	1	-0.167742	1.2	1.03226	2_earlyLymphoid	3_proB_G2MS	NA
CAMLG	1	0	0	down	NA	2.03579e-06	0.111871	0.602235	0.714106	1	-0.078132	1.2191	1.14097	2_earlyLymphoid	3_proB_G2MS	NA
LPIN1	1	0	0	down	NA	2.90439e-12	0.111819	0.789944	0.901763	NA	-0.164894	1.16489	1	2_earlyLymphoid	3_proB_G2MS	NA
C11orf1	1	0	0	down	NA	2.787e-14	0.111633	0.837989	0.949622	NA	-0.062069	1.06207	1	2_earlyLymphoid	3_proB_G2MS	NA
ADAM28	1	0	0	down	NA	6.31111e-07	0.11159	0.887151	0.998741	NA	-1.14851	1.14851	0	2_earlyLymphoid	3_proB_G2MS	NA
SCAI	1	0	0	down	NA	5.19756e-12	0.111255	0.716201	0.827456	1	-0.0962124	1.11811	1.0219	2_earlyLymphoid	3_proB_G2MS	NA
ZNF580	1	0	0	down	NA	3.00664e-12	0.111089	0.774302	0.88539	1	0.00652813	1.05941	1.06593	2_earlyLymphoid	3_proB_G2MS	NA
NBEAL1	1	0	0	down	NA	6.87556e-07	0.110785	0.762011	0.872796	1	-0.0886906	1.09859	1.0099	2_earlyLymphoid	3_proB_G2MS	NA
RHOH	1	0	0	down	NA	4.69817e-10	0.110501	0.759777	0.870277	0.808821	-0.262271	1.33023	1.06796	2_earlyLymphoid	3_proB_G2MS	NA
SPINT2	1	0	0	down	NA	5.19809e-08	0.110019	0.656983	0.767003	1	-0.112281	1.21498	1.1027	2_earlyLymphoid	3_proB_G2MS	NA
CCNB1IP1	1	0	0	down	NA	1.13909e-07	0.109857	0.64581	0.755668	1	-0.00278058	1.14196	1.13918	2_earlyLymphoid	3_proB_G2MS	NA
RABAC1	1	0	0	down	NA	2.24432e-05	0.10985	0.427933	0.537783	0.001246	-0.213971	1.41016	1.19619	2_earlyLymphoid	3_proB_G2MS	NA
PRDX5	1	0	0	down	NA	4.62528e-07	0.109767	0.456983	0.566751	0.562394	-0.144344	1.38272	1.23837	2_earlyLymphoid	3_proB_G2MS	NA
CCS	1	0	0	down	NA	1.02063e-12	0.109727	0.793296	0.903023	1	-0.0475254	1.08649	1.03896	2_earlyLymphoid	3_proB_G2MS	NA
TAOK3	1	0	0	down	NA	8.07349e-09	0.109672	0.693855	0.803526	1	0.00973236	1.15693	1.16667	2_earlyLymphoid	3_proB_G2MS	NA
SBDS	1	0	0	down	NA	1.03718e-09	0.109442	0.791061	0.900504	1	-0.103026	1.12834	1.02532	2_earlyLymphoid	3_proB_G2MS	NA
FKBP8	1	0	0	down	NA	1.02474e-06	0.109317	0.512849	0.622166	1	-0.0066055	1.17661	1.17	2_earlyLymphoid	3_proB_G2MS	NA
PPIB	1	0	0	down	NA	9.83137e-07	0.109164	0.363128	0.472292	1	-0.183474	1.80877	1.6253	2_earlyLymphoid	3_proB_G2MS	NA
MRPS21	1	0	0	down	NA	7.29431e-06	0.108934	0.460335	0.56927	1	-0.00646544	1.31056	1.30409	2_earlyLymphoid	3_proB_G2MS	NA
HSP90AB1	1	0	0	down	NA	1.31271e-05	0.108509	0.100559	0.209068	4.30463e-11	-0.907499	3.89317	2.98567	2_earlyLymphoid	3_proB_G2MS	NA
ISCU	1	0	0	down	NA	2.6451e-08	0.108393	0.683799	0.792191	1	-0.0847628	1.16961	1.08485	2_earlyLymphoid	3_proB_G2MS	NA
CMTM3	1	0	0	down	NA	4.39956e-12	0.108349	0.732961	0.84131	1	0.0111244	1.09205	1.10317	2_earlyLymphoid	3_proB_G2MS	NA
ZYX	1	0	0	down	NA	4.30552e-13	0.108139	0.840223	0.948363	NA	-0.0909091	1.09091	1	2_earlyLymphoid	3_proB_G2MS	NA
SNHG7	1	0	0	down	NA	5.03404e-06	0.108058	0.512849	0.620907	0.0335761	-0.413797	1.8922	1.47841	2_earlyLymphoid	3_proB_G2MS	NA
FCGRT	1	0	0	down	NA	6.52583e-13	0.106797	0.869274	0.976071	NA	-1.1453	1.1453	0	2_earlyLymphoid	3_proB_G2MS	NA
TMEM173	1	0	0	down	NA	9.46211e-15	0.106453	0.836872	0.943325	NA	-0.116438	1.11644	1	2_earlyLymphoid	3_proB_G2MS	NA
NME3	1	0	0	down	NA	1.21406e-11	0.106066	0.853631	0.959698	NA	-0.0763359	1.07634	1	2_earlyLymphoid	3_proB_G2MS	NA
CXorf21	1	0	0	down	NA	2.42187e-15	0.106007	0.823464	0.929471	1	-0.0845389	1.12025	1.03571	2_earlyLymphoid	3_proB_G2MS	NA
C4orf3	1	0	0	down	NA	2.85182e-07	0.105965	0.516201	0.622166	0.0657238	-0.167444	1.34411	1.17667	2_earlyLymphoid	3_proB_G2MS	NA
BAZ2B	1	0	0	down	NA	9.7325e-10	0.105948	0.793296	0.899244	1	-0.0652027	1.1027	1.0375	2_earlyLymphoid	3_proB_G2MS	NA
TARBP1	1	0	0	down	NA	1.42659e-11	0.105561	0.810056	0.915617	1	-0.0258121	1.07059	1.04478	2_earlyLymphoid	3_proB_G2MS	NA
CDK6	1	0	0	down	NA	1.31191e-05	0.105464	0.403352	0.508816	0.315432	-0.190867	1.60112	1.41026	2_earlyLymphoid	3_proB_G2MS	NA
ITGAL	1	0	0	down	NA	7.89418e-12	0.10515	0.886034	0.991184	NA	-1.03922	1.03922	0	2_earlyLymphoid	3_proB_G2MS	NA
SUPT3H	1	0	0	down	NA	1.96714e-13	0.104768	0.83352	0.938287	1	-0.0601287	1.08054	1.02041	2_earlyLymphoid	3_proB_G2MS	NA
EIF3G	1	0	0	down	NA	0.00023812	0.104651	0.41676	0.521411	0.0548166	-0.153519	1.4272	1.27368	2_earlyLymphoid	3_proB_G2MS	NA
TTC3	1	0	0	down	NA	0.000221303	0.10398	0.431285	0.535264	0.232764	-0.167314	1.45187	1.28455	2_earlyLymphoid	3_proB_G2MS	NA
CCDC57	1	0	0	down	NA	6.44422e-12	0.103915	0.826816	0.93073	NA	-0.0903226	1.09032	1	2_earlyLymphoid	3_proB_G2MS	NA
GRINA	1	0	0	down	NA	1.30394e-13	0.103709	0.864804	0.968514	NA	-1.04132	1.04132	0	2_earlyLymphoid	3_proB_G2MS	NA
COTL1	1	0	0	down	NA	1.30467e-09	0.103283	0.861453	0.964736	NA	-1.62097	1.62097	0	2_earlyLymphoid	3_proB_G2MS	NA
WDR74	1	0	0	down	NA	8.7535e-07	0.103237	0.623464	0.7267	0.0293001	-0.714628	2.20772	1.49309	2_earlyLymphoid	3_proB_G2MS	NA
GLTSCR2	1	0	0	down	NA	0.000108533	0.102879	0.155307	0.258186	1.36872e-05	-0.369899	2.42593	2.05603	2_earlyLymphoid	3_proB_G2MS	NA
SASH3	1	0	0	down	NA	6.04303e-08	0.10285	0.640223	0.743073	0.718164	-0.136341	1.20497	1.06863	2_earlyLymphoid	3_proB_G2MS	NA
TBXAS1	1	0	0	down	NA	2.29823e-14	0.10245	0.864804	0.967254	NA	-1.03306	1.03306	0	2_earlyLymphoid	3_proB_G2MS	NA
CASP4	1	0	0	down	NA	9.14074e-06	0.102443	0.646927	0.74937	0.526264	-0.155636	1.23101	1.07538	2_earlyLymphoid	3_proB_G2MS	NA
GNPTAB	1	0	0	down	NA	7.18055e-11	0.102028	0.792179	0.894207	1	-0.0115207	1.05914	1.04762	2_earlyLymphoid	3_proB_G2MS	NA
EBPL	1	0	0	down	NA	0.000192043	0.10178	0.522905	0.624685	1	-0.0753187	1.28337	1.20805	2_earlyLymphoid	3_proB_G2MS	NA
PDE7A	1	0	0	down	NA	5.28829e-14	0.101376	0.81676	0.918136	NA	-0.103659	1.10366	1	2_earlyLymphoid	3_proB_G2MS	NA
LIPA	1	0	0	down	NA	7.51762e-14	0.101013	0.774302	0.875315	1	-0.0140514	1.05446	1.0404	2_earlyLymphoid	3_proB_G2MS	NA
AKNA	1	0	0	down	NA	3.79122e-13	0.101009	0.843575	0.944584	1	-0.0272727	1.05	1.02273	2_earlyLymphoid	3_proB_G2MS	NA
DPP7	1	0	0	down	NA	9.85135e-08	0.100934	0.734078	0.835013	1	-0.013439	1.10504	1.0916	2_earlyLymphoid	3_proB_G2MS	NA
LINC00152	1	0	0	down	NA	2.45178e-13	0.100661	0.880447	0.981108	NA	-1.06542	1.06542	0	2_earlyLymphoid	3_proB_G2MS	NA
FLNB	1	0	0	down	NA	2.72707e-14	0.10048	0.859218	0.959698	NA	-0.0243056	1.05556	1.03125	2_earlyLymphoid	3_proB_G2MS	NA
DNAJB6	1	0	0	down	NA	3.18382e-05	0.100418	0.541899	0.642317	1	-0.128049	1.37805	1.25	2_earlyLymphoid	3_proB_G2MS	NA
AL592183.1	1	0	0	down	NA	6.11453e-07	0.100141	0.757542	0.857683	1	-0.131969	1.20276	1.0708	2_earlyLymphoid	3_proB_G2MS	NA
TLE3	1	0	0	down	NA	1.34205e-08	0.100132	0.896089	0.996222	NA	-1.13978	1.13978	0	2_earlyLymphoid	3_proB_G2MS	NA
SPAG5	1	0	0	up	NA	4.6851e-06	-0.100084	0.985475	0.88539	NA	1.05495	0	1.05495	2_earlyLymphoid	3_proB_G2MS	NA
CCNG2	1	0	0	up	NA	5.20331e-05	-0.100325	0.934078	0.833753	1	0.049435	1.0339	1.08333	2_earlyLymphoid	3_proB_G2MS	NA
PXDN	1	0	0	up	NA	4.56091e-07	-0.100531	0.972067	0.871537	NA	1.07843	0	1.07843	2_earlyLymphoid	3_proB_G2MS	NA
BLM	1	0	0	up	NA	8.47164e-06	-0.101138	0.947486	0.846348	1	0.00331357	1.02128	1.02459	2_earlyLymphoid	3_proB_G2MS	NA
CLEC2D	1	0	0	up	NA	1.54957e-08	-0.101344	0.985475	0.884131	NA	1.11957	0	1.11957	2_earlyLymphoid	3_proB_G2MS	NA
TOMM40	1	0	0	up	NA	0.000749596	-0.101371	0.757542	0.656171	1	-0.0098074	1.10138	1.09158	2_earlyLymphoid	3_proB_G2MS	NA
C14orf80	1	0	0	up	NA	0.000377549	-0.101383	0.965363	0.86398	NA	0.0277778	1	1.02778	2_earlyLymphoid	3_proB_G2MS	NA
C8orf88	1	0	0	up	NA	0.000326229	-0.101423	0.945251	0.843829	1	0.0118499	1.02041	1.03226	2_earlyLymphoid	3_proB_G2MS	NA
FANCA	1	0	0	up	NA	6.69256e-06	-0.101545	0.95419	0.852645	NA	0.00854701	1	1.00855	2_earlyLymphoid	3_proB_G2MS	NA
CENPQ	1	0	0	up	NA	2.92487e-05	-0.102358	0.967598	0.865239	NA	1.02804	0	1.02804	2_earlyLymphoid	3_proB_G2MS	NA
ZNF704	1	0	0	up	NA	4.23027e-08	-0.102765	0.974302	0.871537	NA	1.05882	0	1.05882	2_earlyLymphoid	3_proB_G2MS	NA
POLE2	1	0	0	up	NA	2.8234e-06	-0.102785	0.964246	0.861461	NA	0.0181818	1	1.01818	2_earlyLymphoid	3_proB_G2MS	NA
CIT	1	0	0	up	NA	2.49098e-07	-0.103579	0.987709	0.884131	NA	1.01087	0	1.01087	2_earlyLymphoid	3_proB_G2MS	NA
KDELC2	1	0	0	up	NA	0.000367	-0.103677	0.93743	0.833753	1	0.0579004	1.01786	1.07576	2_earlyLymphoid	3_proB_G2MS	NA
KIF14	1	0	0	up	NA	7.66898e-07	-0.103701	0.996648	0.892947	NA	1.09412	0	1.09412	2_earlyLymphoid	3_proB_G2MS	NA
RHOB	1	0	0	up	NA	2.47599e-06	-0.10449	0.950838	0.846348	1	-0.0152757	1.11364	1.09836	2_earlyLymphoid	3_proB_G2MS	NA
HIST1H2AG	1	0	0	up	NA	1.99932e-06	-0.104593	0.969832	0.865239	NA	1.1215	0	1.1215	2_earlyLymphoid	3_proB_G2MS	NA
EIF1AY	1	0	0	up	NA	0.000165584	-0.105761	0.802235	0.696474	1	0.111611	1.22034	1.33195	2_earlyLymphoid	3_proB_G2MS	NA
FAM43A	1	0	0	up	NA	4.64693e-10	-0.105955	0.988827	0.882872	NA	1.11828	0	1.11828	2_earlyLymphoid	3_proB_G2MS	NA
RBM38	1	0	0	up	NA	0.000377549	-0.10676	0.863687	0.756927	1	0.0497324	1.09016	1.1399	2_earlyLymphoid	3_proB_G2MS	NA
MIS12	1	0	0	up	NA	0.000359573	-0.10774	0.935196	0.827456	NA	0.00729927	1	1.0073	2_earlyLymphoid	3_proB_G2MS	NA
RSRC2	1	0	0	up	NA	0.000928674	-0.107825	0.677095	0.56927	1	0.0477954	1.23875	1.28655	2_earlyLymphoid	3_proB_G2MS	NA
ICOSLG	1	0	0	up	NA	1.94253e-06	-0.107882	0.934078	0.826196	1	0.0143699	1.05085	1.06522	2_earlyLymphoid	3_proB_G2MS	NA
STK38	1	0	0	up	NA	1.78583e-05	-0.108004	0.943017	0.835013	1	-0.013022	1.05882	1.0458	2_earlyLymphoid	3_proB_G2MS	NA
CD52	1	0	0	up	NA	1.06774e-06	-0.108034	0.427933	0.319899	1	-0.130064	2.72266	2.59259	2_earlyLymphoid	3_proB_G2MS	NA
TUBGCP3	1	0	0	up	NA	0.000547502	-0.108573	0.938547	0.829975	1	0.0262626	1.01818	1.04444	2_earlyLymphoid	3_proB_G2MS	NA
DDX11	1	0	0	up	NA	8.02412e-06	-0.108837	0.946369	0.837531	NA	0.0542636	1	1.05426	2_earlyLymphoid	3_proB_G2MS	NA
HNRNPK	1	1	0	up	up	1.50084e-07	-0.108889	0.134078	0.0251889	0	1.16988	2.48903	3.65891	2_earlyLymphoid	3_proB_G2MS	NA
CLIC4	1	0	0	up	NA	1.84696e-06	-0.109224	0.963128	0.853904	NA	-0.0216823	1.0303	1.00862	2_earlyLymphoid	3_proB_G2MS	NA
MBOAT2	1	0	0	up	NA	7.85089e-06	-0.109366	0.962011	0.852645	NA	-0.00754148	1.05882	1.05128	2_earlyLymphoid	3_proB_G2MS	NA
KAZALD1	1	0	0	up	NA	1.21434e-07	-0.10967	0.949721	0.84005	1	-0.0337708	1.08889	1.05512	2_earlyLymphoid	3_proB_G2MS	NA
RBL1	1	0	0	up	NA	1.84696e-06	-0.109812	0.948603	0.838791	1	0.00509511	1.06522	1.07031	2_earlyLymphoid	3_proB_G2MS	NA
NAV1	1	0	0	up	NA	4.60918e-08	-0.110038	0.976536	0.866499	NA	1.04717	0	1.04717	2_earlyLymphoid	3_proB_G2MS	NA
HNRNPA2B1	1	1	0	up	up	1.02376e-05	-0.110472	0.111732	0.00125945	0	3.78405	3.3761	7.16015	2_earlyLymphoid	3_proB_G2MS	NA
PAIP2	1	0	0	up	NA	0.00055715	-0.110647	0.30838	0.197733	0.00137784	0.285699	1.66721	1.9529	2_earlyLymphoid	3_proB_G2MS	NA
MTFR2	1	0	0	up	NA	7.39816e-10	-0.110871	0.979888	0.869018	NA	1.00962	0	1.00962	2_earlyLymphoid	3_proB_G2MS	NA
ATP2A3	1	0	0	up	NA	0.000528857	-0.110906	0.890503	0.779597	1	0.0310204	1.02041	1.05143	2_earlyLymphoid	3_proB_G2MS	NA
C16orf59	1	0	0	up	NA	6.07996e-09	-0.111032	0.968715	0.857683	NA	1.0177	0	1.0177	2_earlyLymphoid	3_proB_G2MS	NA
LHPP	1	0	0	up	NA	1.44942e-06	-0.111317	0.96648	0.855164	NA	1.12174	0	1.12174	2_earlyLymphoid	3_proB_G2MS	NA
COX6C	1	0	0	up	NA	4.04063e-08	-0.111633	0.162011	0.0503778	4.17709e-12	0.593563	2.11333	2.7069	2_earlyLymphoid	3_proB_G2MS	NA
BCL7B	1	0	0	up	NA	0.000498556	-0.111695	0.844693	0.732997	1	0.0345459	1.05036	1.08491	2_earlyLymphoid	3_proB_G2MS	NA
TTK	1	0	0	up	NA	4.37369e-08	-0.111826	0.992179	0.880353	NA	1.06316	0	1.06316	2_earlyLymphoid	3_proB_G2MS	NA
FOXO1	1	0	0	up	NA	1.9306e-08	-0.111846	0.982123	0.870277	NA	1.04854	0	1.04854	2_earlyLymphoid	3_proB_G2MS	NA
SLC27A3	1	0	0	up	NA	4.03271e-06	-0.112047	0.950838	0.838791	1	0.0397727	1.02273	1.0625	2_earlyLymphoid	3_proB_G2MS	NA
PSMC3IP	1	0	0	up	NA	7.79742e-10	-0.11215	0.969832	0.857683	NA	1.04425	0	1.04425	2_earlyLymphoid	3_proB_G2MS	NA
SRSF3	1	1	0	up	up	4.89949e-08	-0.112545	0.12514	0.0125945	0	2.20313	2.7433	4.94643	2_earlyLymphoid	3_proB_G2MS	NA
POLD1	1	0	0	up	NA	0.000479498	-0.112939	0.924022	0.811083	1	0.0519608	1.01471	1.06667	2_earlyLymphoid	3_proB_G2MS	NA
MRPL12	1	0	0	up	NA	0.000738171	-0.11295	0.775419	0.662469	1	-0.0447761	1.13433	1.08955	2_earlyLymphoid	3_proB_G2MS	NA
IRS2	1	0	0	up	NA	8.42344e-05	-0.113121	0.902793	0.789673	1	0.0673136	1.03448	1.1018	2_earlyLymphoid	3_proB_G2MS	NA
DBF4	1	0	0	up	NA	0.000701249	-0.113263	0.901676	0.788413	1	0.0443723	1.05682	1.10119	2_earlyLymphoid	3_proB_G2MS	NA
PRPS1	1	0	0	up	NA	0.000553601	-0.113263	0.901676	0.788413	1	-0.00487013	1.02273	1.01786	2_earlyLymphoid	3_proB_G2MS	NA
GINS4	1	0	0	up	NA	6.69591e-09	-0.113267	0.97095	0.857683	NA	1.0177	0	1.0177	2_earlyLymphoid	3_proB_G2MS	NA
HIST1H2AL	1	0	0	up	NA	4.96209e-09	-0.113512	0.988827	0.875315	NA	1.09091	0	1.09091	2_earlyLymphoid	3_proB_G2MS	NA
CHAMP1	1	0	0	up	NA	1.41011e-05	-0.113895	0.936313	0.822418	NA	0.0212766	1	1.02128	2_earlyLymphoid	3_proB_G2MS	NA
CCDC81	1	0	0	up	NA	9.1371e-10	-0.113938	0.985475	0.871537	NA	1.03922	0	1.03922	2_earlyLymphoid	3_proB_G2MS	NA
SSBP1	1	0	0	up	NA	0.000547458	-0.113944	0.411173	0.297229	0.567033	0.109214	1.42125	1.53047	2_earlyLymphoid	3_proB_G2MS	NA
SUV39H2	1	0	0	up	NA	2.42868e-05	-0.113997	0.955307	0.84131	NA	0.0396825	1	1.03968	2_earlyLymphoid	3_proB_G2MS	NA
ING1	1	0	0	up	NA	6.20573e-05	-0.114179	0.934078	0.819899	1	0.0150527	1.0339	1.04895	2_earlyLymphoid	3_proB_G2MS	NA
FANCB	1	0	0	up	NA	4.30896e-08	-0.114953	0.967598	0.852645	NA	1.01709	0	1.01709	2_earlyLymphoid	3_proB_G2MS	NA
ARL6IP4	1	0	0	up	NA	2.31596e-05	-0.115322	0.350838	0.235516	0.196004	0.187208	1.5525	1.7397	2_earlyLymphoid	3_proB_G2MS	NA
INTS10	1	0	0	up	NA	0.000170358	-0.115778	0.832402	0.716625	1	0.0488889	1.06667	1.11556	2_earlyLymphoid	3_proB_G2MS	NA
BZW1	1	0	0	up	NA	0.000321657	-0.1158	0.535196	0.419395	1	0.0607792	1.28846	1.34924	2_earlyLymphoid	3_proB_G2MS	NA
CAMK1D	1	0	0	up	NA	0.000631501	-0.115884	0.92067	0.804786	1	0.0363471	1.02817	1.06452	2_earlyLymphoid	3_proB_G2MS	NA
SLC25A5	1	1	0	up	up	1.34346e-09	-0.11602	0.13743	0.0214106	0	1.29743	2.57902	3.87645	2_earlyLymphoid	3_proB_G2MS	NA
RAD54L	1	0	0	up	NA	3.52373e-09	-0.116457	0.985475	0.869018	NA	1	0	1	2_earlyLymphoid	3_proB_G2MS	NA
TTF2	1	0	0	up	NA	0.000981349	-0.116575	0.92514	0.808564	1	0.0377062	1.01493	1.05263	2_earlyLymphoid	3_proB_G2MS	NA
CEP152	1	0	0	up	NA	4.80868e-06	-0.116943	0.951955	0.835013	1	-0.000355051	1.02326	1.0229	2_earlyLymphoid	3_proB_G2MS	NA
MED10	1	0	0	up	NA	0.000843735	-0.117033	0.763128	0.646096	1	0.00315585	1.13208	1.13523	2_earlyLymphoid	3_proB_G2MS	NA
EMC9	1	0	0	up	NA	5.85265e-07	-0.117492	0.957542	0.84005	NA	0.0445504	1.02632	1.07087	2_earlyLymphoid	3_proB_G2MS	NA
CHEK2	1	0	0	up	NA	1.12495e-06	-0.11804	0.963128	0.845088	NA	0.0243902	1	1.02439	2_earlyLymphoid	3_proB_G2MS	NA
AARS	1	0	0	up	NA	4.25561e-07	-0.11806	0.953073	0.835013	NA	0.0458015	1	1.0458	2_earlyLymphoid	3_proB_G2MS	NA
HS2ST1	1	0	0	up	NA	0.000100889	-0.118526	0.929609	0.811083	NA	0.06	1	1.06	2_earlyLymphoid	3_proB_G2MS	NA
KATNAL1	1	0	0	up	NA	9.26444e-09	-0.119035	0.955307	0.836272	NA	0.0384615	1	1.03846	2_earlyLymphoid	3_proB_G2MS	NA
TIMM10	1	0	0	up	NA	0.000159612	-0.119232	0.854749	0.735516	1	0.0230769	1.07692	1.1	2_earlyLymphoid	3_proB_G2MS	NA
DONSON	1	0	0	up	NA	1.62406e-05	-0.11944	0.605587	0.486146	1	-0.0391046	1.49008	1.45098	2_earlyLymphoid	3_proB_G2MS	NA
SOD1	1	0	0	up	NA	5.67362e-06	-0.119463	0.30838	0.188917	0.456909	0.187555	1.72859	1.91615	2_earlyLymphoid	3_proB_G2MS	NA
ALOX5AP	1	0	0	up	NA	0.0002461	-0.119663	0.92067	0.801008	1	0.0751471	1.07042	1.14557	2_earlyLymphoid	3_proB_G2MS	NA
POLA2	1	0	0	up	NA	8.40639e-07	-0.119746	0.949721	0.829975	1	0.037037	1.04444	1.08148	2_earlyLymphoid	3_proB_G2MS	NA
DDB2	1	0	0	up	NA	0.000882401	-0.12007	0.927374	0.807305	1	0.00613374	1.04615	1.05229	2_earlyLymphoid	3_proB_G2MS	NA
CKAP5	1	0	0	up	NA	8.01535e-06	-0.120133	0.96648	0.846348	NA	1.04918	0	1.04918	2_earlyLymphoid	3_proB_G2MS	NA
TRA2A	1	0	0	up	NA	7.92593e-05	-0.120337	0.648045	0.527708	1	0.102984	1.33968	1.44267	2_earlyLymphoid	3_proB_G2MS	NA
DIAPH3	1	0	0	up	NA	1.17869e-08	-0.1205	0.993296	0.872796	NA	1.0198	0	1.0198	2_earlyLymphoid	3_proB_G2MS	NA
UBE2D3	1	0	0	up	NA	0.000124278	-0.12062	0.289385	0.168766	0.466461	0.166724	1.74843	1.91515	2_earlyLymphoid	3_proB_G2MS	NA
CD22	1	0	0	up	NA	4.20418e-05	-0.120717	0.882682	0.761965	1	-0.0486772	1.13333	1.08466	2_earlyLymphoid	3_proB_G2MS	NA
JADE1	1	0	0	up	NA	0.000584161	-0.120839	0.89162	0.770781	1	0.0370454	1.06186	1.0989	2_earlyLymphoid	3_proB_G2MS	NA
RBM39	1	0	0	up	NA	0.000959387	-0.120849	0.386592	0.265743	0.0273716	0.185061	1.65027	1.83533	2_earlyLymphoid	3_proB_G2MS	NA
SPDL1	1	0	0	up	NA	2.6286e-06	-0.120966	0.969832	0.848866	NA	1.11667	0	1.11667	2_earlyLymphoid	3_proB_G2MS	NA
NFYB	1	0	0	up	NA	0.000966443	-0.122099	0.89162	0.769521	NA	0.0874317	1	1.08743	2_earlyLymphoid	3_proB_G2MS	NA
NFATC2IP	1	0	0	up	NA	0.00049497	-0.122118	0.881564	0.759446	1	0.0701373	1.01887	1.08901	2_earlyLymphoid	3_proB_G2MS	NA
KRR1	1	0	0	up	NA	0.000681769	-0.122154	0.792179	0.670025	1	0.0675121	1.06989	1.1374	2_earlyLymphoid	3_proB_G2MS	NA
GALNT14	1	0	0	up	NA	1.17483e-07	-0.122225	0.969832	0.847607	NA	1.02479	0	1.02479	2_earlyLymphoid	3_proB_G2MS	NA
FADS1	1	0	0	up	NA	0.000487842	-0.122324	0.919553	0.797229	1	-0.00258799	1.08333	1.08075	2_earlyLymphoid	3_proB_G2MS	NA
MRPL23	1	0	0	up	NA	0.000407373	-0.122382	0.532961	0.410579	1	0.0423261	1.30383	1.34615	2_earlyLymphoid	3_proB_G2MS	NA
DOK3	1	0	0	up	NA	0.000623028	-0.122486	0.90838	0.785894	1	0.010043	1.04878	1.05882	2_earlyLymphoid	3_proB_G2MS	NA
POLR2I	1	0	0	up	NA	0.000431047	-0.122729	0.569832	0.447103	0.336238	0.116392	1.23896	1.35535	2_earlyLymphoid	3_proB_G2MS	NA
CHAF1B	1	0	0	up	NA	3.90557e-09	-0.123382	0.950838	0.827456	NA	0.0437956	1	1.0438	2_earlyLymphoid	3_proB_G2MS	NA
APITD1	1	0	0	up	NA	2.45294e-07	-0.123402	0.940782	0.81738	1	0.00182173	1.01887	1.02069	2_earlyLymphoid	3_proB_G2MS	NA
EIF5	1	0	0	up	NA	3.54422e-05	-0.123429	0.712849	0.589421	1	0.0376095	1.15564	1.19325	2_earlyLymphoid	3_proB_G2MS	NA
MCUR1	1	0	0	up	NA	9.07176e-05	-0.12352	0.880447	0.756927	1	0.0134134	1.02804	1.04145	2_earlyLymphoid	3_proB_G2MS	NA
PACSIN2	1	0	0	up	NA	3.74395e-05	-0.123564	0.929609	0.806045	1	0.0295815	1.01587	1.04545	2_earlyLymphoid	3_proB_G2MS	NA
OIP5	1	0	0	up	NA	2.64334e-06	-0.123647	0.958659	0.835013	NA	0.0763359	1	1.07634	2_earlyLymphoid	3_proB_G2MS	NA
HIF1A	1	0	0	up	NA	3.64292e-05	-0.123654	0.740782	0.617128	1	-0.0259755	1.2069	1.18092	2_earlyLymphoid	3_proB_G2MS	NA
OAZ1	1	1	0	up	up	4.28976e-11	-0.123699	0.146369	0.02267	0	1.1033	2.73691	3.84021	2_earlyLymphoid	3_proB_G2MS	NA
C2orf48	1	0	0	up	NA	1.04389e-08	-0.123994	0.995531	0.871537	NA	1.03922	0	1.03922	2_earlyLymphoid	3_proB_G2MS	NA
CHTF18	1	0	0	up	NA	8.19803e-08	-0.124176	0.974302	0.850126	NA	1.0084	0	1.0084	2_earlyLymphoid	3_proB_G2MS	NA
SLC35E3	1	0	0	up	NA	2.23209e-07	-0.124701	0.92067	0.79597	1	0.0952878	1.02817	1.12346	2_earlyLymphoid	3_proB_G2MS	NA
COL5A1	1	0	0	up	NA	1.42731e-11	-0.125455	0.964246	0.838791	NA	-0.015625	1.09375	1.07812	2_earlyLymphoid	3_proB_G2MS	NA
RDX	1	0	0	up	NA	0.000401341	-0.125573	0.903911	0.778338	1	0.107162	1.03488	1.14205	2_earlyLymphoid	3_proB_G2MS	NA
GDI2	1	0	0	up	NA	0.000564269	-0.1258	0.288268	0.162469	6.24365e-05	0.342345	1.69074	2.03308	2_earlyLymphoid	3_proB_G2MS	NA
OXCT1	1	0	0	up	NA	6.64869e-05	-0.126161	0.889385	0.763224	1	0.0548034	1.0303	1.08511	2_earlyLymphoid	3_proB_G2MS	NA
NDUFC2	1	0	0	up	NA	0.000582827	-0.126341	0.511732	0.38539	1	0.0571285	1.27689	1.33402	2_earlyLymphoid	3_proB_G2MS	NA
WHSC1L1	1	0	0	up	NA	0.000127938	-0.126481	0.797765	0.671285	1	0.0244068	1.08287	1.10728	2_earlyLymphoid	3_proB_G2MS	NA
PLK4	1	0	0	up	NA	8.02589e-09	-0.126552	0.975419	0.848866	NA	1.025	0	1.025	2_earlyLymphoid	3_proB_G2MS	NA
HMGN5	1	0	0	up	NA	1.09652e-05	-0.126651	0.92514	0.798489	1	0.130224	1.04478	1.175	2_earlyLymphoid	3_proB_G2MS	NA
FAM53B	1	0	0	up	NA	1.34431e-10	-0.126999	0.962011	0.835013	NA	0.0163898	1.02941	1.0458	2_earlyLymphoid	3_proB_G2MS	NA
SMC6	1	0	0	up	NA	0.000145589	-0.127298	0.880447	0.753149	1	0.0655159	1.04673	1.11224	2_earlyLymphoid	3_proB_G2MS	NA
CNOT1	1	0	0	up	NA	0.000136496	-0.127314	0.801117	0.673804	1	0.0164635	1.09551	1.11197	2_earlyLymphoid	3_proB_G2MS	NA
RUVBL1	1	0	0	up	NA	0.000502637	-0.127417	0.820112	0.692695	1	0.0440637	1.09938	1.14344	2_earlyLymphoid	3_proB_G2MS	NA
PRDM2	1	0	0	up	NA	1.84696e-06	-0.12744	0.87933	0.751889	1	0.0408911	1.05556	1.09645	2_earlyLymphoid	3_proB_G2MS	NA
BRCA1	1	0	0	up	NA	3.70246e-07	-0.127445	0.948603	0.821159	1	0.019902	1.04348	1.06338	2_earlyLymphoid	3_proB_G2MS	NA
SRRM2	1	0	0	up	NA	0.000154387	-0.127751	0.649162	0.521411	1	0.0558666	1.17834	1.23421	2_earlyLymphoid	3_proB_G2MS	NA
CDK5RAP2	1	0	0	up	NA	4.06836e-07	-0.127871	0.945251	0.81738	1	0.0416608	1.02041	1.06207	2_earlyLymphoid	3_proB_G2MS	NA
TOPBP1	1	0	0	up	NA	9.8065e-05	-0.128092	0.903911	0.775819	1	0.0441599	1.02326	1.06742	2_earlyLymphoid	3_proB_G2MS	NA
NEK2	1	0	0	up	NA	1.57139e-08	-0.128625	0.988827	0.860202	NA	1.14414	0	1.14414	2_earlyLymphoid	3_proB_G2MS	NA
GADD45B	1	0	0	up	NA	8.48389e-05	-0.128739	0.859218	0.730479	1	-0.00452455	1.15873	1.15421	2_earlyLymphoid	3_proB_G2MS	NA
NABP2	1	0	0	up	NA	0.000658849	-0.129268	0.87486	0.745592	1	0.0187412	1.03571	1.05446	2_earlyLymphoid	3_proB_G2MS	NA
NDUFA3	1	0	0	up	NA	0.00024078	-0.129306	0.498324	0.369018	0.786507	0.128851	1.31626	1.44511	2_earlyLymphoid	3_proB_G2MS	NA
ATP5G3	1	0	0	up	NA	3.58326e-07	-0.129471	0.2	0.070529	4.17811e-13	0.591456	2.06844	2.65989	2_earlyLymphoid	3_proB_G2MS	NA
CDCA2	1	0	0	up	NA	1.1338e-10	-0.1296	0.991061	0.861461	NA	1.02727	0	1.02727	2_earlyLymphoid	3_proB_G2MS	NA
SLFN13	1	0	0	up	NA	1.24829e-09	-0.129802	0.959777	0.829975	NA	0.0111111	1.05556	1.06667	2_earlyLymphoid	3_proB_G2MS	NA
POLR2E	1	0	0	up	NA	0.000697936	-0.12999	0.72067	0.59068	1	-0.0178462	1.144	1.12615	2_earlyLymphoid	3_proB_G2MS	NA
GINS3	1	0	0	up	NA	4.60918e-08	-0.130208	0.96648	0.836272	NA	1.02308	0	1.02308	2_earlyLymphoid	3_proB_G2MS	NA
FKBP1A	1	0	0	up	NA	0.000101191	-0.13021	0.322905	0.192695	0.000320432	0.255122	1.64191	1.89704	2_earlyLymphoid	3_proB_G2MS	NA
LDHA	1	0	0	up	NA	7.40761e-06	-0.130284	0.213408	0.0831234	2.32514e-09	0.760942	2.62642	3.38736	2_earlyLymphoid	3_proB_G2MS	NA
C4orf46	1	0	0	up	NA	2.37233e-06	-0.13041	0.935196	0.804786	NA	0.0516129	1	1.05161	2_earlyLymphoid	3_proB_G2MS	NA
VSIG10	1	0	0	up	NA	4.69817e-10	-0.130493	0.964246	0.833753	NA	-0.063447	1.09375	1.0303	2_earlyLymphoid	3_proB_G2MS	NA
MNS1	1	0	0	up	NA	1.99917e-09	-0.130757	0.972067	0.84131	NA	1.05556	0	1.05556	2_earlyLymphoid	3_proB_G2MS	NA
SLC20A1	1	0	0	up	NA	1.48889e-05	-0.130895	0.901676	0.770781	1	0.0981518	1.02273	1.12088	2_earlyLymphoid	3_proB_G2MS	NA
ENSA	1	0	0	up	NA	3.57304e-05	-0.130953	0.515084	0.384131	1	0.0714097	1.27419	1.3456	2_earlyLymphoid	3_proB_G2MS	NA
ARPC4	1	0	0	up	NA	0.000166071	-0.131162	0.622346	0.491184	1	0.00691312	1.24556	1.25248	2_earlyLymphoid	3_proB_G2MS	NA
PCBP1	1	0	0	up	NA	9.92692e-06	-0.131331	0.393296	0.261965	0.000165648	0.265137	1.38674	1.65188	2_earlyLymphoid	3_proB_G2MS	NA
BSG	1	0	0	up	NA	0.000509084	-0.131364	0.591061	0.459698	0.0403582	0.144484	1.17486	1.31935	2_earlyLymphoid	3_proB_G2MS	NA
MBNL1	1	0	0	up	NA	5.75296e-05	-0.131534	0.718436	0.586902	1	0.0565234	1.15079	1.20732	2_earlyLymphoid	3_proB_G2MS	NA
C14orf166	1	0	0	up	NA	1.0226e-05	-0.131548	0.282682	0.151134	1	0.0545634	1.75701	1.81157	2_earlyLymphoid	3_proB_G2MS	NA
NDUFA1	1	0	0	up	NA	0.000345929	-0.131675	0.360894	0.229219	0.229163	0.173203	1.5	1.6732	2_earlyLymphoid	3_proB_G2MS	NA
NUP54	1	0	0	up	NA	0.000913825	-0.131949	0.863687	0.731738	1	0.0106596	1.04098	1.05164	2_earlyLymphoid	3_proB_G2MS	NA
POLD3	1	0	0	up	NA	2.77559e-06	-0.132644	0.93743	0.804786	1	-0.0391705	1.07143	1.03226	2_earlyLymphoid	3_proB_G2MS	NA
PPP6C	1	0	0	up	NA	0.000176126	-0.132841	0.836872	0.70403	1	0.0225299	1.07534	1.09787	2_earlyLymphoid	3_proB_G2MS	NA
CHAC2	1	0	0	up	NA	7.60041e-11	-0.132992	0.974302	0.84131	NA	1.04762	0	1.04762	2_earlyLymphoid	3_proB_G2MS	NA
NIP7	1	0	0	up	NA	0.000288377	-0.133209	0.863687	0.730479	1	0.0220622	1.05738	1.07944	2_earlyLymphoid	3_proB_G2MS	NA
AKR7A2	1	0	0	up	NA	0.000150861	-0.13367	0.77095	0.63728	1	0.0399221	1.10244	1.14236	2_earlyLymphoid	3_proB_G2MS	NA
TIPIN	1	0	0	up	NA	8.50246e-08	-0.133762	0.938547	0.804786	1	0.00879765	1.03636	1.04516	2_earlyLymphoid	3_proB_G2MS	NA
KANK2	1	0	0	up	NA	1.33887e-10	-0.133967	0.976536	0.842569	NA	1.064	0	1.064	2_earlyLymphoid	3_proB_G2MS	NA
NCAPD3	1	0	0	up	NA	1.00357e-07	-0.134149	0.955307	0.821159	NA	0.056338	1	1.05634	2_earlyLymphoid	3_proB_G2MS	NA
NCAPD2	1	0	0	up	NA	1.17566e-06	-0.134453	0.943017	0.808564	NA	0.0723684	1	1.07237	2_earlyLymphoid	3_proB_G2MS	NA
TRMT112	1	0	0	up	NA	0.000853259	-0.134486	0.497207	0.36272	0.000795149	0.196074	1.35333	1.54941	2_earlyLymphoid	3_proB_G2MS	NA
TOPORS	1	0	0	up	NA	4.41135e-05	-0.134507	0.843575	0.709068	1	0.0584416	1.07143	1.12987	2_earlyLymphoid	3_proB_G2MS	NA
PIM3	1	0	0	up	NA	3.42297e-05	-0.134538	0.684916	0.550378	1	-0.019429	1.31915	1.29972	2_earlyLymphoid	3_proB_G2MS	NA
DCP2	1	0	0	up	NA	0.00024552	-0.13459	0.872626	0.738035	1	0.00843455	1.08772	1.09615	2_earlyLymphoid	3_proB_G2MS	NA
REXO2	1	0	0	up	NA	7.31301e-07	-0.13465	0.842458	0.707809	1	0.16364	1.09929	1.26293	2_earlyLymphoid	3_proB_G2MS	NA
NUP50	1	0	0	up	NA	0.000241027	-0.134673	0.901676	0.767003	1	0.047543	1.02273	1.07027	2_earlyLymphoid	3_proB_G2MS	NA
ARF1	1	0	0	up	NA	0.000839474	-0.134731	0.515084	0.380353	1	0.106824	1.31797	1.4248	2_earlyLymphoid	3_proB_G2MS	NA
DSN1	1	0	0	up	NA	3.42858e-07	-0.134756	0.930726	0.79597	1	0.0157308	1.06452	1.08025	2_earlyLymphoid	3_proB_G2MS	NA
MSH6	1	0	0	up	NA	4.44851e-05	-0.135423	0.875978	0.740554	1	0.0229599	1.10811	1.13107	2_earlyLymphoid	3_proB_G2MS	NA
COX7B	1	0	0	up	NA	4.0335e-07	-0.135445	0.222346	0.0869018	1.01762e-10	0.496494	1.93247	2.42897	2_earlyLymphoid	3_proB_G2MS	NA
ELP6	1	0	0	up	NA	0.000597861	-0.135605	0.854749	0.719144	1	0.0268713	1.05385	1.08072	2_earlyLymphoid	3_proB_G2MS	NA
UXS1	1	0	0	up	NA	3.56907e-05	-0.136359	0.898324	0.761965	1	-0.019536	1.0989	1.07937	2_earlyLymphoid	3_proB_G2MS	NA
EMD	1	0	0	up	NA	1.83138e-05	-0.136418	0.868156	0.731738	1	0.0262195	1.02542	1.05164	2_earlyLymphoid	3_proB_G2MS	NA
E2F8	1	0	0	up	NA	6.97993e-09	-0.136447	0.996648	0.860202	NA	1.06306	0	1.06306	2_earlyLymphoid	3_proB_G2MS	NA
MMS22L	1	0	0	up	NA	4.28747e-05	-0.136663	0.886034	0.74937	1	0.0507439	1.01961	1.07035	2_earlyLymphoid	3_proB_G2MS	NA
KIF4A	1	0	0	up	NA	1.39144e-09	-0.136873	0.993296	0.856423	NA	1.0614	0	1.0614	2_earlyLymphoid	3_proB_G2MS	NA
ATP5B	1	0	0	up	NA	3.73932e-05	-0.13689	0.270391	0.133501	0.000211394	0.374486	1.81011	2.18459	2_earlyLymphoid	3_proB_G2MS	NA
GNL1	1	0	0	up	NA	0.00016278	-0.136967	0.873743	0.736776	1	0.0617352	1.0531	1.11483	2_earlyLymphoid	3_proB_G2MS	NA
FAM107B	1	0	0	up	NA	1.02656e-05	-0.137251	0.871508	0.734257	1	0.0283536	1.10435	1.1327	2_earlyLymphoid	3_proB_G2MS	NA
ANP32B	1	1	0	up	up	1.06504e-10	-0.137371	0.167598	0.0302267	0	1.27291	2.55436	3.82727	2_earlyLymphoid	3_proB_G2MS	NA
NDUFA9	1	0	0	up	NA	0.000279259	-0.137914	0.747486	0.609572	1	0.0691122	1.06637	1.13548	2_earlyLymphoid	3_proB_G2MS	NA
IMMT	1	0	0	up	NA	0.000309161	-0.137958	0.796648	0.65869	1	-0.00853574	1.09341	1.08487	2_earlyLymphoid	3_proB_G2MS	NA
LSM14A	1	0	0	up	NA	0.000103283	-0.138396	0.644693	0.506297	1	0.066487	1.1478	1.21429	2_earlyLymphoid	3_proB_G2MS	NA
RFC1	1	0	0	up	NA	0.000429661	-0.138404	0.78324	0.644836	1	0.0435768	1.08763	1.13121	2_earlyLymphoid	3_proB_G2MS	NA
MCMBP	1	0	0	up	NA	5.01242e-05	-0.138633	0.880447	0.741814	1	0.0882152	1.00935	1.09756	2_earlyLymphoid	3_proB_G2MS	NA
PAICS	1	0	0	up	NA	2.50269e-05	-0.138739	0.612291	0.473552	0.000145612	0.223888	1.25937	1.48325	2_earlyLymphoid	3_proB_G2MS	NA
CD19	1	0	0	up	NA	1.70763e-13	-0.138863	0.977654	0.838791	NA	1.03125	0	1.03125	2_earlyLymphoid	3_proB_G2MS	NA
UQCRQ	1	0	0	up	NA	1.53723e-06	-0.138967	0.353073	0.214106	0.00101357	0.228253	1.56822	1.79647	2_earlyLymphoid	3_proB_G2MS	NA
CNBP	1	0	0	up	NA	1.99523e-06	-0.139129	0.341899	0.202771	0.0808017	0.225106	1.67063	1.89573	2_earlyLymphoid	3_proB_G2MS	NA
C7orf55-LUC7L2	1	0	0	up	NA	0.000345375	-0.139399	0.775419	0.63602	0.823431	0.121744	1.05473	1.17647	2_earlyLymphoid	3_proB_G2MS	NA
CDKN2AIP	1	0	0	up	NA	7.79849e-07	-0.139692	0.911732	0.77204	1	0.0101406	1.05063	1.06077	2_earlyLymphoid	3_proB_G2MS	NA
RAD23B	1	0	0	up	NA	0.000357355	-0.140212	0.788827	0.648615	1	0.00699778	1.10053	1.10753	2_earlyLymphoid	3_proB_G2MS	NA
MRPL37	1	0	0	up	NA	9.70109e-05	-0.140335	0.797765	0.657431	1	0.00725138	1.05525	1.0625	2_earlyLymphoid	3_proB_G2MS	NA
PPP2R1A	1	0	0	up	NA	0.000208241	-0.140532	0.697207	0.556675	1	0.0751006	1.11808	1.19318	2_earlyLymphoid	3_proB_G2MS	NA
LMNB2	1	0	0	up	NA	1.4545e-07	-0.140608	0.944134	0.803526	NA	0.0448718	1	1.04487	2_earlyLymphoid	3_proB_G2MS	NA
RQCD1	1	0	0	up	NA	3.05433e-05	-0.140623	0.864804	0.724181	1	0.0471716	1.05785	1.10502	2_earlyLymphoid	3_proB_G2MS	NA
RAD1	1	0	0	up	NA	1.80146e-06	-0.140686	0.903911	0.763224	1	0.0192974	1.02326	1.04255	2_earlyLymphoid	3_proB_G2MS	NA
SLC16A1	1	0	0	up	NA	1.96756e-08	-0.140769	0.932961	0.792191	1	-0.00151515	1.05	1.04848	2_earlyLymphoid	3_proB_G2MS	NA
DEPDC1	1	0	0	up	NA	2.57513e-10	-0.140793	0.992179	0.851385	NA	1.14407	0	1.14407	2_earlyLymphoid	3_proB_G2MS	NA
PET100	1	0	0	up	NA	5.91218e-05	-0.140934	0.634637	0.493703	0.257603	0.153681	1.1896	1.34328	2_earlyLymphoid	3_proB_G2MS	NA
LSM2	1	0	0	up	NA	0.000372486	-0.141072	0.564246	0.423174	1	0.117434	1.23846	1.3559	2_earlyLymphoid	3_proB_G2MS	NA
DPM1	1	0	0	up	NA	0.000275813	-0.141251	0.830168	0.688917	1	0.0495951	1.03947	1.08907	2_earlyLymphoid	3_proB_G2MS	NA
FABP5	1	0	0	up	NA	3.58627e-05	-0.141289	0.453631	0.312343	1	0.110238	1.80368	1.91392	2_earlyLymphoid	3_proB_G2MS	NA
MELK	1	0	0	up	NA	3.50568e-11	-0.141362	0.987709	0.846348	NA	1.03279	0	1.03279	2_earlyLymphoid	3_proB_G2MS	NA
HTATSF1	1	0	0	up	NA	0.000361001	-0.141511	0.768715	0.627204	1	0.0655764	1.0628	1.12838	2_earlyLymphoid	3_proB_G2MS	NA
RNPS1	1	0	0	up	NA	4.3472e-07	-0.141557	0.530726	0.389169	1	0.0779823	1.26429	1.34227	2_earlyLymphoid	3_proB_G2MS	NA
CCDC107	1	0	0	up	NA	0.000859924	-0.141922	0.844693	0.702771	1	0.067004	1.04317	1.11017	2_earlyLymphoid	3_proB_G2MS	NA
AKIP1	1	0	0	up	NA	1.31271e-05	-0.141926	0.913966	0.77204	NA	0.0939227	1	1.09392	2_earlyLymphoid	3_proB_G2MS	NA
THOC7	1	0	0	up	NA	0.000321107	-0.142106	0.536313	0.394207	1	0.0682414	1.26024	1.32848	2_earlyLymphoid	3_proB_G2MS	NA
HERC5	1	0	0	up	NA	7.92368e-08	-0.142132	0.951955	0.809824	NA	0.0662252	1	1.06623	2_earlyLymphoid	3_proB_G2MS	NA
MRPS16	1	0	0	up	NA	0.00022097	-0.142143	0.803352	0.661209	1	0.0118494	1.0625	1.07435	2_earlyLymphoid	3_proB_G2MS	NA
OSER1	1	0	0	up	NA	1.7083e-06	-0.142167	0.86257	0.720403	1	0.140409	1.04878	1.18919	2_earlyLymphoid	3_proB_G2MS	NA
C20orf24	1	0	0	up	NA	0.000969309	-0.142467	0.781006	0.638539	1	0.0711797	1.06122	1.1324	2_earlyLymphoid	3_proB_G2MS	NA
MTCH2	1	0	0	up	NA	0.000346458	-0.142545	0.740782	0.598237	1	0.0293887	1.09914	1.12853	2_earlyLymphoid	3_proB_G2MS	NA
UBE2D2	1	0	0	up	NA	0.000112132	-0.142548	0.453631	0.311083	0.0211032	0.191193	1.3865	1.5777	2_earlyLymphoid	3_proB_G2MS	NA
FAM133B	1	0	0	up	NA	8.17818e-06	-0.142825	0.669274	0.526448	1	0.0493099	1.24324	1.29255	2_earlyLymphoid	3_proB_G2MS	NA
PARPBP	1	0	0	up	NA	1.47601e-07	-0.142984	0.945251	0.802267	NA	0.101911	1	1.10191	2_earlyLymphoid	3_proB_G2MS	NA
MOB1A	1	0	0	up	NA	6.09025e-05	-0.143153	0.716201	0.573048	1	0.0539451	1.1378	1.19174	2_earlyLymphoid	3_proB_G2MS	NA
EIF4G2	1	0	0	up	NA	3.93196e-07	-0.143195	0.408939	0.265743	0.543924	0.152743	1.59168	1.74443	2_earlyLymphoid	3_proB_G2MS	NA
SUSD3	1	0	0	up	NA	4.48583e-06	-0.143347	0.902793	0.759446	1	-0.00920744	1.10345	1.09424	2_earlyLymphoid	3_proB_G2MS	NA
LSM7	1	0	0	up	NA	4.97196e-09	-0.143388	0.239106	0.0957179	0.00126727	0.320956	2.06902	2.38997	2_earlyLymphoid	3_proB_G2MS	NA
TUBA1C	1	0	0	up	NA	6.90312e-06	-0.143446	0.852514	0.709068	2.43669e-08	0.926407	1.0303	1.95671	2_earlyLymphoid	3_proB_G2MS	NA
COPE	1	0	0	up	NA	4.03743e-05	-0.14346	0.41676	0.2733	0.772895	0.156577	1.44828	1.60485	2_earlyLymphoid	3_proB_G2MS	NA
EXOSC8	1	0	0	up	NA	0.000805826	-0.143568	0.861453	0.717884	1	0.0685484	1.05645	1.125	2_earlyLymphoid	3_proB_G2MS	NA
ATP6V0B	1	0	0	up	NA	6.93868e-05	-0.143615	0.623464	0.479849	1	0.0766699	1.20178	1.27845	2_earlyLymphoid	3_proB_G2MS	NA
ILF3	1	0	0	up	NA	9.6701e-06	-0.144022	0.630168	0.486146	1	0.0617188	1.20544	1.26716	2_earlyLymphoid	3_proB_G2MS	NA
TKT	1	0	0	up	NA	2.319e-05	-0.144265	0.29162	0.147355	0.00382734	0.306963	1.98107	2.28804	2_earlyLymphoid	3_proB_G2MS	NA
YARS	1	0	0	up	NA	4.34327e-05	-0.144382	0.87486	0.730479	1	0.0347964	1.04464	1.07944	2_earlyLymphoid	3_proB_G2MS	NA
MRPL52	1	0	0	up	NA	0.000479752	-0.144496	0.745251	0.600756	1	0.0820881	1.10088	1.18297	2_earlyLymphoid	3_proB_G2MS	NA
SMCO4	1	0	0	up	NA	9.05337e-08	-0.144793	0.950838	0.806045	1	0.00649351	1.04545	1.05195	2_earlyLymphoid	3_proB_G2MS	NA
ACYP1	1	0	0	up	NA	1.71683e-05	-0.145053	0.889385	0.744332	1	0.0926009	1.0404	1.133	2_earlyLymphoid	3_proB_G2MS	NA
SKP2	1	0	0	up	NA	2.22512e-08	-0.145116	0.928492	0.783375	NA	0.0348837	1	1.03488	2_earlyLymphoid	3_proB_G2MS	NA
UBXN4	1	0	0	up	NA	0.000103054	-0.145159	0.621229	0.476071	0.152464	0.152662	1.16224	1.3149	2_earlyLymphoid	3_proB_G2MS	NA
CCT4	1	0	0	up	NA	3.12375e-05	-0.145273	0.49162	0.346348	0.0168376	0.19369	1.38242	1.57611	2_earlyLymphoid	3_proB_G2MS	NA
ZWILCH	1	0	0	up	NA	3.41855e-07	-0.145401	0.926257	0.780856	1	0.0386625	1.0303	1.06897	2_earlyLymphoid	3_proB_G2MS	NA
ARF6	1	0	0	up	NA	1.20571e-05	-0.145526	0.648045	0.502519	1	0.00863974	1.26984	1.27848	2_earlyLymphoid	3_proB_G2MS	NA
CTPS1	1	0	0	up	NA	2.8998e-06	-0.145562	0.915084	0.769521	1	-0.029767	1.07895	1.04918	2_earlyLymphoid	3_proB_G2MS	NA
CTBP2	1	0	0	up	NA	0.000151516	-0.145989	0.911732	0.765743	1	-0.025997	1.10127	1.07527	2_earlyLymphoid	3_proB_G2MS	NA
PSMD1	1	0	0	up	NA	0.000359573	-0.146068	0.871508	0.725441	1	0.0620263	1.04348	1.1055	2_earlyLymphoid	3_proB_G2MS	NA
GNG11	1	0	0	up	NA	1.24423e-06	-0.146151	0.900559	0.754408	1	0.0856814	1.13483	1.22051	2_earlyLymphoid	3_proB_G2MS	NA
PSME2	1	0	0	up	NA	9.74927e-08	-0.146298	0.32514	0.178841	0.0070719	0.338744	1.9404	2.27914	2_earlyLymphoid	3_proB_G2MS	NA
SMARCA5	1	0	0	up	NA	0.000358021	-0.146324	0.740782	0.594458	0.612683	0.116353	1.09483	1.21118	2_earlyLymphoid	3_proB_G2MS	NA
POLR2L	1	0	0	up	NA	1.27546e-06	-0.146567	0.402235	0.255668	0.265814	0.212578	1.50654	1.71912	2_earlyLymphoid	3_proB_G2MS	NA
HYI	1	0	0	up	NA	0.000142866	-0.146616	0.877095	0.730479	1	0.075531	1.02727	1.1028	2_earlyLymphoid	3_proB_G2MS	NA
SYNCRIP	1	0	0	up	NA	4.36655e-05	-0.147496	0.642458	0.494962	1	0.099283	1.1875	1.28678	2_earlyLymphoid	3_proB_G2MS	NA
MATR3	1	0	0	up	NA	2.60651e-06	-0.147547	0.473743	0.326196	0.00639617	0.190468	1.36093	1.5514	2_earlyLymphoid	3_proB_G2MS	NA
LRRCC1	1	0	0	up	NA	7.13275e-08	-0.147635	0.928492	0.780856	1	0.0352011	1.0625	1.0977	2_earlyLymphoid	3_proB_G2MS	NA
TBCA	1	0	0	up	NA	6.66042e-06	-0.147945	0.341899	0.193955	0.0193602	0.2276	1.65365	1.88125	2_earlyLymphoid	3_proB_G2MS	NA
DDX46	1	0	0	up	NA	3.11934e-05	-0.148001	0.598883	0.450882	0.167686	0.166249	1.21448	1.38073	2_earlyLymphoid	3_proB_G2MS	NA
CENPL	1	0	0	up	NA	1.621e-13	-0.148389	0.972067	0.823678	NA	1.05	0	1.05	2_earlyLymphoid	3_proB_G2MS	NA
HP1BP3	1	0	0	up	NA	0.000357355	-0.148412	0.67486	0.526448	0.115343	0.245403	1.16151	1.40691	2_earlyLymphoid	3_proB_G2MS	NA
RHOA	1	0	0	up	NA	7.68666e-10	-0.148691	0.246927	0.0982368	0	0.759656	1.81157	2.57123	2_earlyLymphoid	3_proB_G2MS	NA
SHFM1	1	0	0	up	NA	0.000153732	-0.148861	0.374302	0.225441	1	0.113066	1.53571	1.64878	2_earlyLymphoid	3_proB_G2MS	NA
RP11-545E17.3	1	0	0	up	NA	4.13097e-11	-0.148958	0.967598	0.81864	NA	1.02083	0	1.02083	2_earlyLymphoid	3_proB_G2MS	NA
SRSF11	1	0	0	up	NA	2.03047e-05	-0.149075	0.550838	0.401763	1	0.0949987	1.36816	1.46316	2_earlyLymphoid	3_proB_G2MS	NA
EIF4E	1	0	0	up	NA	6.6451e-05	-0.149127	0.738547	0.589421	1	0.0502596	1.11538	1.16564	2_earlyLymphoid	3_proB_G2MS	NA
POMP	1	0	0	up	NA	1.98793e-07	-0.149161	0.292737	0.143577	7.0038e-05	0.298957	1.71722	2.01618	2_earlyLymphoid	3_proB_G2MS	NA
PCNP	1	0	0	up	NA	5.29253e-06	-0.149359	0.548603	0.399244	0.0830976	0.160523	1.25248	1.413	2_earlyLymphoid	3_proB_G2MS	NA
PYCR2	1	0	0	up	NA	0.000596576	-0.149396	0.815642	0.666247	1	0.0601487	1.06061	1.12075	2_earlyLymphoid	3_proB_G2MS	NA
BOLA3	1	0	0	up	NA	1.49368e-05	-0.149479	0.844693	0.695214	1	0.00856175	1.05755	1.06612	2_earlyLymphoid	3_proB_G2MS	NA
CDC25B	1	0	0	up	NA	5.88024e-11	-0.150075	0.968715	0.81864	NA	1.23611	0	1.23611	2_earlyLymphoid	3_proB_G2MS	NA
SPCS3	1	0	0	up	NA	1.86054e-05	-0.150307	0.778771	0.628463	1	0.0280774	1.14141	1.16949	2_earlyLymphoid	3_proB_G2MS	NA
HIST1H1E	1	0	0	up	NA	6.78119e-09	-0.150454	0.846927	0.696474	0.0063535	0.445225	1.16058	1.60581	2_earlyLymphoid	3_proB_G2MS	NA
RHNO1	1	0	0	up	NA	7.12488e-07	-0.15058	0.92514	0.774559	1	0.0744601	1.01493	1.08939	2_earlyLymphoid	3_proB_G2MS	NA
NDUFA12	1	0	0	up	NA	1.60516e-06	-0.150642	0.607821	0.457179	1	0.0547326	1.20513	1.25986	2_earlyLymphoid	3_proB_G2MS	NA
SNRNP25	1	0	0	up	NA	5.66493e-06	-0.1512	0.751955	0.600756	1	0.0902038	1.16216	1.25237	2_earlyLymphoid	3_proB_G2MS	NA
POC1A	1	0	0	up	NA	3.40285e-11	-0.151477	0.967598	0.816121	NA	1.04795	0	1.04795	2_earlyLymphoid	3_proB_G2MS	NA
YWHAE	1	0	0	up	NA	3.73131e-05	-0.151763	0.321788	0.170025	4.95613e-05	0.344016	1.73641	2.08042	2_earlyLymphoid	3_proB_G2MS	NA
CHRAC1	1	0	0	up	NA	1.04588e-06	-0.152057	0.814525	0.662469	1	0.068333	1.03614	1.10448	2_earlyLymphoid	3_proB_G2MS	NA
CYB5B	1	0	0	up	NA	0.000636826	-0.152076	0.804469	0.652393	1	0.0670186	1.07429	1.1413	2_earlyLymphoid	3_proB_G2MS	NA
USP39	1	0	0	up	NA	0.00023812	-0.152081	0.873743	0.721662	1	0.049974	1.00885	1.05882	2_earlyLymphoid	3_proB_G2MS	NA
KTN1	1	0	0	up	NA	4.03484e-07	-0.15228	0.486034	0.333753	0.123822	0.179301	1.35	1.5293	2_earlyLymphoid	3_proB_G2MS	NA
TRIP13	1	0	0	up	NA	1.53265e-12	-0.153001	0.975419	0.822418	NA	1.03546	0	1.03546	2_earlyLymphoid	3_proB_G2MS	NA
WBP5	1	0	0	up	NA	7.15007e-05	-0.153115	0.84581	0.692695	1	0.0296983	1.10145	1.13115	2_earlyLymphoid	3_proB_G2MS	NA
RBMX	1	0	0	up	NA	7.26379e-06	-0.153125	0.340782	0.187657	6.11003e-09	0.495217	1.62881	2.12403	2_earlyLymphoid	3_proB_G2MS	NA
SRRT	1	0	0	up	NA	4.59419e-05	-0.153237	0.854749	0.701511	1	0.00399221	1.08462	1.08861	2_earlyLymphoid	3_proB_G2MS	NA
VAMP5	1	0	0	up	NA	3.90429e-05	-0.153474	0.734078	0.580605	1	0.0289575	1.21429	1.24324	2_earlyLymphoid	3_proB_G2MS	NA
SHMT1	1	0	0	up	NA	2.60368e-10	-0.154015	0.957542	0.803526	NA	-0.0212551	1.07895	1.05769	2_earlyLymphoid	3_proB_G2MS	NA
FLOT1	1	0	0	up	NA	8.69612e-05	-0.15409	0.848045	0.693955	1	0.107268	1.03676	1.14403	2_earlyLymphoid	3_proB_G2MS	NA
AP3S1	1	0	0	up	NA	0.000102353	-0.154156	0.6	0.445844	0.416164	0.149733	1.18436	1.33409	2_earlyLymphoid	3_proB_G2MS	NA
TMED2	1	0	0	up	NA	2.32581e-05	-0.154657	0.487151	0.332494	0.287995	0.0994204	1.39869	1.49811	2_earlyLymphoid	3_proB_G2MS	NA
FH	1	0	0	up	NA	0.000296544	-0.154659	0.843575	0.688917	1	0.0147773	1.05	1.06478	2_earlyLymphoid	3_proB_G2MS	NA
LYL1	1	0	0	up	NA	9.11984e-06	-0.154659	0.843575	0.688917	1	0.0831405	1.10714	1.19028	2_earlyLymphoid	3_proB_G2MS	NA
AURKAIP1	1	0	0	up	NA	3.88382e-06	-0.154827	0.614525	0.459698	1	0.0934631	1.15362	1.24709	2_earlyLymphoid	3_proB_G2MS	NA
MEF2C	1	0	0	up	NA	3.87925e-05	-0.155103	0.473743	0.31864	0.147188	0.188705	1.59873	1.78743	2_earlyLymphoid	3_proB_G2MS	NA
GGNBP2	1	0	0	up	NA	3.0171e-07	-0.155302	0.729609	0.574307	1	0.0944545	1.15702	1.25148	2_earlyLymphoid	3_proB_G2MS	NA
PSMD11	1	0	0	up	NA	6.47308e-05	-0.155369	0.837989	0.68262	1	0.0517789	1.02759	1.07937	2_earlyLymphoid	3_proB_G2MS	NA
TXNDC9	1	0	0	up	NA	0.000216991	-0.155413	0.887151	0.731738	1	0.0256124	1.0495	1.07512	2_earlyLymphoid	3_proB_G2MS	NA
RB1	1	0	0	up	NA	1.264e-06	-0.155614	0.855866	0.700252	1	0.0281741	1.08527	1.11345	2_earlyLymphoid	3_proB_G2MS	NA
SUZ12	1	0	0	up	NA	2.94354e-07	-0.155634	0.84581	0.690176	1	0.0486037	1.06522	1.11382	2_earlyLymphoid	3_proB_G2MS	NA
FAIM	1	0	0	up	NA	2.21473e-06	-0.155658	0.905028	0.74937	NA	0.105528	1	1.10553	2_earlyLymphoid	3_proB_G2MS	NA
SF3B4	1	0	0	up	NA	0.000126132	-0.155796	0.834637	0.678841	1	0.0418124	1.04054	1.08235	2_earlyLymphoid	3_proB_G2MS	NA
PRDX1	1	1	0	up	up	1.00223e-08	-0.156002	0.22905	0.0730479	3.01856e-09	1.08016	3.41304	4.49321	2_earlyLymphoid	3_proB_G2MS	NA
C11orf83	1	0	0	up	NA	1.75555e-06	-0.156163	0.861453	0.70529	1	-0.00420458	1.07258	1.06838	2_earlyLymphoid	3_proB_G2MS	NA
MRPS18C	1	0	0	up	NA	0.000150595	-0.156237	0.751955	0.595718	0.781044	0.114844	1.07207	1.18692	2_earlyLymphoid	3_proB_G2MS	NA
SEP15	1	0	0	up	NA	0.000661351	-0.156319	0.424581	0.268262	4.9948e-10	0.375894	1.37282	1.74871	2_earlyLymphoid	3_proB_G2MS	NA
IFITM3	1	0	0	up	NA	7.99569e-05	-0.156399	0.740782	0.584383	1	-0.067581	1.28879	1.22121	2_earlyLymphoid	3_proB_G2MS	NA
NHP2L1	1	0	0	up	NA	2.59767e-05	-0.156505	0.472626	0.316121	0.14136	0.170463	1.4428	1.61326	2_earlyLymphoid	3_proB_G2MS	NA
THOC3	1	0	0	up	NA	2.44297e-06	-0.156653	0.897207	0.740554	1	0.0704939	1.02174	1.09223	2_earlyLymphoid	3_proB_G2MS	NA
GLRX5	1	0	0	up	NA	4.80937e-07	-0.156771	0.836872	0.680101	1	0.0643404	1.06164	1.12598	2_earlyLymphoid	3_proB_G2MS	NA
ING2	1	0	0	up	NA	4.10851e-07	-0.156873	0.855866	0.698992	1	0.0151471	1.08527	1.10042	2_earlyLymphoid	3_proB_G2MS	NA
GPANK1	1	0	0	up	NA	2.37054e-05	-0.156957	0.884916	0.72796	1	0.110662	1.00971	1.12037	2_earlyLymphoid	3_proB_G2MS	NA
HIST1H2AH	1	0	0	up	NA	9.09298e-13	-0.157044	0.98324	0.826196	NA	1.13768	0	1.13768	2_earlyLymphoid	3_proB_G2MS	NA
MESDC1	1	0	0	up	NA	2.76984e-08	-0.157162	0.922905	0.765743	1	0.0102852	1.04348	1.05376	2_earlyLymphoid	3_proB_G2MS	NA
HIST1H2BN	1	0	0	up	NA	6.63294e-10	-0.157206	0.972067	0.814861	NA	1.16327	0	1.16327	2_earlyLymphoid	3_proB_G2MS	NA
PDS5B	1	0	0	up	NA	2.79401e-05	-0.157584	0.850279	0.692695	1	0.0718742	1.02239	1.09426	2_earlyLymphoid	3_proB_G2MS	NA
CRELD2	1	0	0	up	NA	0.000229842	-0.157604	0.840223	0.68262	1	0.0510046	1.08392	1.13492	2_earlyLymphoid	3_proB_G2MS	NA
BUB1	1	0	0	up	NA	1.71921e-11	-0.158019	0.985475	0.827456	NA	1.12409	0	1.12409	2_earlyLymphoid	3_proB_G2MS	NA
CDK2AP2	1	0	0	up	NA	0.000105765	-0.158559	0.852514	0.693955	1	0.080434	1.12121	1.20165	2_earlyLymphoid	3_proB_G2MS	NA
PDE6D	1	0	0	up	NA	6.91384e-06	-0.158583	0.911732	0.753149	NA	0.0408163	1	1.04082	2_earlyLymphoid	3_proB_G2MS	NA
RFWD3	1	0	0	up	NA	1.78409e-10	-0.158706	0.92067	0.761965	NA	0.0793651	1	1.07937	2_earlyLymphoid	3_proB_G2MS	NA
MCM10	1	0	0	up	NA	7.63006e-12	-0.158769	0.959777	0.801008	NA	0.0140647	1.05556	1.06962	2_earlyLymphoid	3_proB_G2MS	NA
ELP5	1	0	0	up	NA	4.19541e-05	-0.158903	0.820112	0.661209	1	0.0804221	1.04969	1.13011	2_earlyLymphoid	3_proB_G2MS	NA
PLK1	1	0	0	up	NA	5.24549e-08	-0.158974	0.997765	0.838791	NA	1.54688	0	1.54688	2_earlyLymphoid	3_proB_G2MS	NA
SNRPD1	1	0	0	up	NA	3.49893e-09	-0.159094	0.293855	0.134761	3.78631e-11	0.601367	1.79747	2.39884	2_earlyLymphoid	3_proB_G2MS	NA
C19orf43	1	0	0	up	NA	5.60262e-07	-0.15926	0.351955	0.192695	5.60981e-09	0.440473	1.51897	1.95944	2_earlyLymphoid	3_proB_G2MS	NA
PRPF19	1	0	0	up	NA	4.70574e-07	-0.159491	0.805587	0.646096	1	0.021925	1.09195	1.11388	2_earlyLymphoid	3_proB_G2MS	NA
GNB2	1	0	0	up	NA	3.7656e-05	-0.159526	0.716201	0.556675	1	0.103279	1.09843	1.2017	2_earlyLymphoid	3_proB_G2MS	NA
NDUFB7	1	0	0	up	NA	1.41473e-06	-0.159636	0.517318	0.357683	0.0108272	0.180637	1.22917	1.4098	2_earlyLymphoid	3_proB_G2MS	NA
ZNF22	1	0	0	up	NA	0.000724355	-0.159699	0.556425	0.396725	1	0.110731	1.29219	1.40292	2_earlyLymphoid	3_proB_G2MS	NA
HIST2H2AC	1	0	0	up	NA	6.18207e-10	-0.15972	0.902793	0.743073	1	0.148073	1.12644	1.27451	2_earlyLymphoid	3_proB_G2MS	NA
MED30	1	0	0	up	NA	2.21081e-07	-0.159786	0.654749	0.494962	1	-0.00512473	1.20712	1.202	2_earlyLymphoid	3_proB_G2MS	NA
PPIH	1	0	0	up	NA	8.84069e-07	-0.159795	0.793296	0.633501	1	0.0274171	1.07568	1.10309	2_earlyLymphoid	3_proB_G2MS	NA
ACOT7	1	0	0	up	NA	1.58931e-12	-0.159906	0.950838	0.790932	NA	0.0542169	1	1.05422	2_earlyLymphoid	3_proB_G2MS	NA
DTL	1	0	0	up	NA	5.32769e-13	-0.160028	0.959777	0.799748	NA	0.0387841	1.05556	1.09434	2_earlyLymphoid	3_proB_G2MS	NA
CYC1	1	0	0	up	NA	7.13275e-08	-0.16011	0.632402	0.472292	0.608924	0.10425	1.17021	1.27446	2_earlyLymphoid	3_proB_G2MS	NA
SF3A2	1	0	0	up	NA	4.82825e-06	-0.160608	0.806704	0.646096	1	0.0840927	1.04046	1.12456	2_earlyLymphoid	3_proB_G2MS	NA
ELK3	1	0	0	up	NA	6.94766e-09	-0.160656	0.92514	0.764484	1	0.0815708	1.08955	1.17112	2_earlyLymphoid	3_proB_G2MS	NA
WHSC1	1	0	0	up	NA	9.73564e-08	-0.160695	0.905028	0.744332	1	0.0946972	1.02353	1.11823	2_earlyLymphoid	3_proB_G2MS	NA
SNRPF	1	0	0	up	NA	1.36319e-09	-0.1608	0.280447	0.119647	4.88514e-05	0.333918	1.75621	2.09013	2_earlyLymphoid	3_proB_G2MS	NA
SKA1	1	0	0	up	NA	1.54881e-12	-0.161087	0.991061	0.829975	NA	1.05926	0	1.05926	2_earlyLymphoid	3_proB_G2MS	NA
EIF1B	1	0	0	up	NA	4.98728e-08	-0.161129	0.683799	0.52267	1	0.083547	1.20141	1.28496	2_earlyLymphoid	3_proB_G2MS	NA
ITGB1BP1	1	0	0	up	NA	2.7803e-05	-0.161177	0.802235	0.641058	1	0.0438894	1.05085	1.09474	2_earlyLymphoid	3_proB_G2MS	NA
MSH2	1	0	0	up	NA	5.20524e-07	-0.16173	0.877095	0.715365	1	0.0435237	1.02727	1.0708	2_earlyLymphoid	3_proB_G2MS	NA
CMC2	1	0	0	up	NA	2.63508e-06	-0.161848	0.81676	0.654912	1	0.0899502	1.03049	1.12044	2_earlyLymphoid	3_proB_G2MS	NA
TUBB	1	1	0	up	up	3.82342e-13	-0.161991	0.172067	0.0100756	0	11.5219	3.37382	14.8957	2_earlyLymphoid	3_proB_G2MS	NA
MDM2	1	0	0	up	NA	6.2587e-09	-0.162219	0.912849	0.75063	1	0.117716	1.0641	1.18182	2_earlyLymphoid	3_proB_G2MS	NA
EGFL7	1	0	0	up	NA	2.23398e-06	-0.162447	0.653631	0.491184	1	0.0547748	1.37097	1.42574	2_earlyLymphoid	3_proB_G2MS	NA
PPP3CC	1	0	0	up	NA	5.84489e-05	-0.162705	0.87933	0.716625	1	0.0922222	1.02778	1.12	2_earlyLymphoid	3_proB_G2MS	NA
VDAC3	1	0	0	up	NA	1.39404e-06	-0.162795	0.690503	0.527708	1	0.0781998	1.11913	1.19733	2_earlyLymphoid	3_proB_G2MS	NA
PSMC4	1	0	0	up	NA	5.16839e-06	-0.162823	0.818994	0.656171	1	0.0630172	1.04321	1.10623	2_earlyLymphoid	3_proB_G2MS	NA
CEP78	1	0	0	up	NA	1.29268e-08	-0.162891	0.927374	0.764484	1	0.0227067	1.03077	1.05348	2_earlyLymphoid	3_proB_G2MS	NA
CNP	1	0	0	up	NA	2.30897e-08	-0.16293	0.907263	0.744332	NA	0.0837438	1	1.08374	2_earlyLymphoid	3_proB_G2MS	NA
CHCHD3	1	0	0	up	NA	8.08933e-06	-0.163186	0.776536	0.61335	1	0.0740065	1.04	1.11401	2_earlyLymphoid	3_proB_G2MS	NA
PIN4	1	0	0	up	NA	9.90688e-07	-0.163549	0.734078	0.570529	0.937522	0.109909	1.09244	1.20235	2_earlyLymphoid	3_proB_G2MS	NA
PSMA2-1	1	0	0	up	NA	1.31692e-06	-0.163552	0.446927	0.283375	0.65745	0.0955247	1.41414	1.50967	2_earlyLymphoid	3_proB_G2MS	NA
YWHAB	1	0	0	up	NA	1.44353e-07	-0.163651	0.396648	0.232997	0.363518	0.182731	1.56111	1.74384	2_earlyLymphoid	3_proB_G2MS	NA
NDUFA11	1	0	0	up	NA	1.9099e-07	-0.163856	0.434637	0.270781	0.0702834	0.158133	1.417	1.57513	2_earlyLymphoid	3_proB_G2MS	NA
LINC00341	1	0	0	up	NA	1.40259e-11	-0.163969	0.948603	0.784635	1	0.0191965	1.02174	1.04094	2_earlyLymphoid	3_proB_G2MS	NA
PHF19	1	0	0	up	NA	1.68228e-10	-0.164071	0.967598	0.803526	NA	1.07692	0	1.07692	2_earlyLymphoid	3_proB_G2MS	NA
STAG1	1	0	0	up	NA	1.17217e-05	-0.164106	0.878212	0.714106	1	0.0470032	1.0367	1.0837	2_earlyLymphoid	3_proB_G2MS	NA
PSMD7	1	0	0	up	NA	2.1604e-06	-0.164295	0.639106	0.474811	1	0.0715341	1.18266	1.2542	2_earlyLymphoid	3_proB_G2MS	NA
HJURP	1	0	0	up	NA	8.98653e-11	-0.164439	0.994413	0.829975	NA	1.0963	0	1.0963	2_earlyLymphoid	3_proB_G2MS	NA
RPP30	1	0	0	up	NA	1.89737e-06	-0.164533	0.87486	0.710327	1	0.0647516	1.01786	1.08261	2_earlyLymphoid	3_proB_G2MS	NA
ACAT2	1	0	0	up	NA	2.2114e-06	-0.164572	0.854749	0.690176	1	0.120513	1.04615	1.16667	2_earlyLymphoid	3_proB_G2MS	NA
DHX9	1	0	0	up	NA	3.16487e-06	-0.164607	0.765363	0.600756	1	0.0481448	1.11905	1.16719	2_earlyLymphoid	3_proB_G2MS	NA
SSNA1	1	0	0	up	NA	3.53214e-06	-0.164686	0.72514	0.560453	1	0.125469	1.08943	1.2149	2_earlyLymphoid	3_proB_G2MS	NA
INO80C	1	0	0	up	NA	1.41291e-08	-0.164699	0.932961	0.768262	1	0.0210145	1.03333	1.05435	2_earlyLymphoid	3_proB_G2MS	NA
DHX15	1	0	0	up	NA	7.85456e-05	-0.164955	0.802235	0.63728	1	0.0523776	1.10734	1.15972	2_earlyLymphoid	3_proB_G2MS	NA
SRSF10-1	1	0	0	up	NA	1.79985e-07	-0.165003	0.92067	0.755668	1	0.0749238	1.02817	1.10309	2_earlyLymphoid	3_proB_G2MS	NA
EFCAB2	1	0	0	up	NA	1.39404e-06	-0.165204	0.889385	0.724181	1	0.0747198	1.0303	1.10502	2_earlyLymphoid	3_proB_G2MS	NA
BTG2	1	0	0	up	NA	7.12933e-09	-0.165445	0.837989	0.672544	1	0.0799735	1.1931	1.27308	2_earlyLymphoid	3_proB_G2MS	NA
HIST1H2AJ	1	0	0	up	NA	3.98156e-13	-0.165576	0.985475	0.819899	NA	1.17483	0	1.17483	2_earlyLymphoid	3_proB_G2MS	NA
PPIG	1	0	0	up	NA	4.05213e-06	-0.165858	0.626816	0.460957	0.0859722	0.189294	1.21257	1.40187	2_earlyLymphoid	3_proB_G2MS	NA
POLR3K	1	0	0	up	NA	2.01949e-07	-0.166179	0.89162	0.725441	1	0.0401967	1.05155	1.09174	2_earlyLymphoid	3_proB_G2MS	NA
GBP4	1	0	0	up	NA	7.52991e-05	-0.166278	0.841341	0.675063	1	0.0342286	1.07042	1.10465	2_earlyLymphoid	3_proB_G2MS	NA
STAG2	1	0	0	up	NA	2.81453e-07	-0.166298	0.831285	0.664987	1	0.0143405	1.10596	1.1203	2_earlyLymphoid	3_proB_G2MS	NA
NUP62	1	0	0	up	NA	1.12863e-07	-0.166302	0.900559	0.734257	1	0.0658182	1.03371	1.09953	2_earlyLymphoid	3_proB_G2MS	NA
PBRM1	1	0	0	up	NA	1.84895e-06	-0.167008	0.825698	0.65869	1	0.0549484	1.07051	1.12546	2_earlyLymphoid	3_proB_G2MS	NA
TP53	1	0	0	up	NA	7.25912e-06	-0.167249	0.774302	0.607053	1	-0.00310993	1.16337	1.16026	2_earlyLymphoid	3_proB_G2MS	NA
COPS8	1	0	0	up	NA	1.32056e-05	-0.167435	0.822346	0.654912	1	0.0691135	1.04403	1.11314	2_earlyLymphoid	3_proB_G2MS	NA
C1orf35	1	0	0	up	NA	4.22556e-07	-0.167581	0.890503	0.722922	1	0.0523191	1.02041	1.07273	2_earlyLymphoid	3_proB_G2MS	NA
MDK	1	0	0	up	NA	6.39972e-07	-0.167616	0.801117	0.633501	1	0.0518939	1.37079	1.42268	2_earlyLymphoid	3_proB_G2MS	NA
POLR2G	1	0	0	up	NA	1.75996e-05	-0.167848	0.611173	0.443325	0.212776	0.148489	1.1954	1.34389	2_earlyLymphoid	3_proB_G2MS	NA
DPY30	1	0	0	up	NA	0.00011915	-0.167916	0.719553	0.551637	1	0.0218452	1.13546	1.1573	2_earlyLymphoid	3_proB_G2MS	NA
KIAA1524	1	0	0	up	NA	1.17172e-12	-0.168134	0.965363	0.797229	NA	0.00500902	1.03226	1.03727	2_earlyLymphoid	3_proB_G2MS	NA
EPB41L2	1	0	0	up	NA	2.13404e-06	-0.168213	0.92514	0.756927	NA	0.103627	1	1.10363	2_earlyLymphoid	3_proB_G2MS	NA
ZNF367	1	0	0	up	NA	4.68018e-13	-0.168276	0.964246	0.79597	NA	-0.0131173	1.0625	1.04938	2_earlyLymphoid	3_proB_G2MS	NA
ALYREF	1	0	0	up	NA	5.08812e-11	-0.168477	0.932961	0.764484	1	-0.0292335	1.06667	1.03743	2_earlyLymphoid	3_proB_G2MS	NA
UBL5	1	0	0	up	NA	1.02354e-08	-0.168498	0.27933	0.110831	2.95237e-15	0.497086	1.75504	2.25212	2_earlyLymphoid	3_proB_G2MS	NA
PIM1	1	0	0	up	NA	2.7702e-12	-0.168678	0.901676	0.732997	1	0.0355918	1.06818	1.10377	2_earlyLymphoid	3_proB_G2MS	NA
TPRKB	1	0	0	up	NA	1.86795e-05	-0.168764	0.643575	0.474811	1	0.0686799	1.15674	1.22542	2_earlyLymphoid	3_proB_G2MS	NA
IGLL1	1	1	0	up	up	3.7935e-14	-0.16894	0.196648	0.0277078	0	4.60924	8.84284	13.4521	2_earlyLymphoid	3_proB_G2MS	NA
ARHGDIA	1	0	0	up	NA	4.18115e-06	-0.168966	0.612291	0.443325	0.103486	0.180383	1.24496	1.42534	2_earlyLymphoid	3_proB_G2MS	NA
ADRM1	1	0	0	up	NA	3.15968e-07	-0.169057	0.779888	0.610831	1	0.0920769	1.04061	1.13269	2_earlyLymphoid	3_proB_G2MS	NA
ATP5J2	1	0	0	up	NA	5.74974e-10	-0.169087	0.264804	0.0957179	2.95237e-15	0.599478	1.65957	2.25905	2_earlyLymphoid	3_proB_G2MS	NA
RP11-343N15.5	1	0	0	up	NA	1.47857e-11	-0.169232	0.976536	0.807305	NA	1.08497	0	1.08497	2_earlyLymphoid	3_proB_G2MS	NA
DNAJA1	1	0	0	up	NA	3.88097e-06	-0.16925	0.610056	0.440806	0.104665	0.225754	1.29226	1.51802	2_earlyLymphoid	3_proB_G2MS	NA
HMHB1	1	0	0	up	NA	9.73199e-10	-0.169291	0.946369	0.777078	1	0.227754	1.02083	1.24859	2_earlyLymphoid	3_proB_G2MS	NA
ADI1	1	0	0	up	NA	2.46388e-05	-0.169724	0.72514	0.555416	0.882585	0.135344	1.14228	1.27762	2_earlyLymphoid	3_proB_G2MS	NA
PHF5A	1	0	0	up	NA	1.95829e-06	-0.169993	0.802235	0.632242	1	0.0808374	1.0904	1.17123	2_earlyLymphoid	3_proB_G2MS	NA
PLSCR1	1	0	0	up	NA	5.03812e-05	-0.170767	0.835754	0.664987	1	0.0929108	1.06122	1.15414	2_earlyLymphoid	3_proB_G2MS	NA
DBNL	1	0	0	up	NA	8.58733e-07	-0.170782	0.756425	0.585642	1	0.105993	1.06422	1.17021	2_earlyLymphoid	3_proB_G2MS	NA
GHITM	1	0	0	up	NA	8.87027e-06	-0.170789	0.538547	0.367758	1	0.0947976	1.25182	1.34661	2_earlyLymphoid	3_proB_G2MS	NA
ARHGAP11A	1	0	0	up	NA	6.49204e-14	-0.170917	0.973184	0.802267	NA	1.05732	0	1.05732	2_earlyLymphoid	3_proB_G2MS	NA
CISD2	1	0	0	up	NA	4.62723e-06	-0.170988	0.794413	0.623426	1	0.0894649	1.05435	1.14381	2_earlyLymphoid	3_proB_G2MS	NA
CDKN2A	1	0	0	up	NA	1.26853e-11	-0.17102	0.992179	0.821159	NA	1.09859	0	1.09859	2_earlyLymphoid	3_proB_G2MS	NA
RASGRP2	1	0	0	up	NA	5.85493e-07	-0.171058	0.615642	0.444584	0.239983	0.127696	1.24419	1.37188	2_earlyLymphoid	3_proB_G2MS	NA
TSSC1	1	0	0	up	NA	7.84196e-07	-0.171114	0.872626	0.701511	1	0.0450811	1.03509	1.08017	2_earlyLymphoid	3_proB_G2MS	NA
THRAP3	1	0	0	up	NA	7.03891e-06	-0.171607	0.621229	0.449622	0.00382734	0.165185	1.21239	1.37757	2_earlyLymphoid	3_proB_G2MS	NA
MLTK	1	0	0	up	NA	4.38857e-08	-0.171624	0.898324	0.7267	1	0.0701879	1.02198	1.09217	2_earlyLymphoid	3_proB_G2MS	NA
CRIP1	1	0	0	up	NA	1.40771e-10	-0.17181	0.946369	0.774559	1	0.257914	1.16667	1.42458	2_earlyLymphoid	3_proB_G2MS	NA
TIMELESS	1	0	0	up	NA	3.16856e-11	-0.171829	0.936313	0.764484	1	0.0573225	1.01754	1.07487	2_earlyLymphoid	3_proB_G2MS	NA
NDUFB10	1	0	0	up	NA	5.49599e-08	-0.171863	0.490503	0.31864	0.000923311	0.188422	1.24781	1.43623	2_earlyLymphoid	3_proB_G2MS	NA
PLEKHF2	1	0	0	up	NA	1.08644e-08	-0.171967	0.865922	0.693955	1	0.0613169	1.03333	1.09465	2_earlyLymphoid	3_proB_G2MS	NA
SF3B2	1	0	0	up	NA	6.946e-07	-0.172068	0.528492	0.356423	0.0346356	0.175216	1.27488	1.4501	2_earlyLymphoid	3_proB_G2MS	NA
STK24	1	0	0	up	NA	1.05811e-08	-0.172702	0.919553	0.746851	1	0.02301	1.04167	1.06468	2_earlyLymphoid	3_proB_G2MS	NA
ARPC5	1	0	0	up	NA	4.73641e-06	-0.172775	0.453631	0.280856	0.178491	0.151347	1.49489	1.64623	2_earlyLymphoid	3_proB_G2MS	NA
GLRX3	1	0	0	up	NA	5.62553e-06	-0.172914	0.739665	0.566751	1	0.0437294	1.09871	1.14244	2_earlyLymphoid	3_proB_G2MS	NA
LRRC59	1	0	0	up	NA	7.42887e-08	-0.173531	0.853631	0.680101	1	0.0176715	1.06107	1.07874	2_earlyLymphoid	3_proB_G2MS	NA
TCP1	1	0	0	up	NA	6.49766e-07	-0.173553	0.556425	0.382872	0.00477201	0.203727	1.29219	1.49592	2_earlyLymphoid	3_proB_G2MS	NA
SEC63	1	0	0	up	NA	1.19325e-07	-0.173664	0.713966	0.540302	0.608401	0.127868	1.14062	1.26849	2_earlyLymphoid	3_proB_G2MS	NA
ISG20	1	0	0	up	NA	1.52046e-11	-0.174182	0.878212	0.70403	1	0.0236971	1.20183	1.22553	2_earlyLymphoid	3_proB_G2MS	NA
PSMA4	1	0	0	up	NA	7.70529e-08	-0.174247	0.273743	0.0994962	5.26665e-07	0.517343	1.97077	2.48811	2_earlyLymphoid	3_proB_G2MS	NA
CD47	1	0	0	up	NA	1.31878e-06	-0.174342	0.510615	0.336272	5.22583e-06	0.283963	1.25114	1.5351	2_earlyLymphoid	3_proB_G2MS	NA
EXOSC9	1	0	0	up	NA	7.1729e-07	-0.174873	0.882682	0.707809	1	0.0447044	1.02857	1.07328	2_earlyLymphoid	3_proB_G2MS	NA
MRPL47	1	0	0	up	NA	3.36693e-07	-0.175046	0.722905	0.547859	1	0.0870698	1.09677	1.18384	2_earlyLymphoid	3_proB_G2MS	NA
POP7	1	0	0	up	NA	2.28295e-08	-0.175197	0.860335	0.685139	1	0.084	1.032	1.116	2_earlyLymphoid	3_proB_G2MS	NA
MRPL55	1	0	0	up	NA	2.44663e-09	-0.175212	0.781006	0.605793	1	0.0723414	1.07143	1.14377	2_earlyLymphoid	3_proB_G2MS	NA
UBE2V2	1	0	0	up	NA	1.51077e-06	-0.175472	0.719553	0.544081	0.635461	0.123891	1.12749	1.25138	2_earlyLymphoid	3_proB_G2MS	NA
HADH	1	0	0	up	NA	5.6039e-06	-0.175938	0.696089	0.520151	1	0.0744558	1.16176	1.23622	2_earlyLymphoid	3_proB_G2MS	NA
ESD	1	0	0	up	NA	1.11529e-05	-0.17604	0.358659	0.18262	0.000485685	0.327271	1.60801	1.93529	2_earlyLymphoid	3_proB_G2MS	NA
EIF4H	1	0	0	up	NA	1.16057e-05	-0.17642	0.593296	0.416877	0.949499	0.125395	1.21154	1.33693	2_earlyLymphoid	3_proB_G2MS	NA
C16orf80	1	0	0	up	NA	3.09424e-07	-0.176515	0.830168	0.653652	1	0.086244	1.05921	1.14545	2_earlyLymphoid	3_proB_G2MS	NA
NSL1	1	0	0	up	NA	1.22486e-05	-0.177044	0.84581	0.668766	1	0.0180746	1.05797	1.07605	2_earlyLymphoid	3_proB_G2MS	NA
RCN2	1	0	0	up	NA	3.48242e-07	-0.17711	0.597765	0.420655	0.0193705	0.172947	1.14444	1.31739	2_earlyLymphoid	3_proB_G2MS	NA
MAPRE1	1	0	0	up	NA	3.61331e-07	-0.177139	0.726257	0.549118	0.178752	0.124866	1.12653	1.2514	2_earlyLymphoid	3_proB_G2MS	NA
H1FX	1	0	0	up	NA	5.3792e-07	-0.177193	0.626816	0.449622	1	0.0527275	1.48503	1.53776	2_earlyLymphoid	3_proB_G2MS	NA
C11orf73	1	0	0	up	NA	1.29689e-05	-0.177241	0.745251	0.56801	1	0.0376707	1.07895	1.11662	2_earlyLymphoid	3_proB_G2MS	NA
SDHB	1	0	0	up	NA	3.0145e-06	-0.177285	0.794413	0.617128	1	0.00614989	1.07609	1.08224	2_earlyLymphoid	3_proB_G2MS	NA
UFD1L	1	0	0	up	NA	2.68144e-08	-0.177285	0.794413	0.617128	1	0.0729405	1.06522	1.13816	2_earlyLymphoid	3_proB_G2MS	NA
ITGAE	1	0	0	up	NA	1.41166e-10	-0.177549	0.802235	0.624685	1	0.070849	1.07345	1.1443	2_earlyLymphoid	3_proB_G2MS	NA
MZT2A	1	0	0	up	NA	6.15701e-07	-0.177915	0.472626	0.29471	7.79024e-05	0.253904	1.37288	1.62679	2_earlyLymphoid	3_proB_G2MS	NA
PPP2CA	1	0	0	up	NA	1.02723e-07	-0.177928	0.680447	0.502519	1	0.0762946	1.13636	1.21266	2_earlyLymphoid	3_proB_G2MS	NA
COX17	1	0	0	up	NA	1.05083e-07	-0.177932	0.749721	0.571788	1	0.0316702	1.18304	1.21471	2_earlyLymphoid	3_proB_G2MS	NA
NCAPG2	1	0	0	up	NA	1.08587e-14	-0.178067	0.96648	0.788413	NA	1.05357	0	1.05357	2_earlyLymphoid	3_proB_G2MS	NA
CALM1	1	0	0	up	NA	2.62398e-10	-0.1782	0.470391	0.292191	0.000201556	0.396264	1.51477	1.91103	2_earlyLymphoid	3_proB_G2MS	NA
FANCG	1	0	0	up	NA	1.56664e-13	-0.178209	0.965363	0.787154	NA	0.0532544	1	1.05325	2_earlyLymphoid	3_proB_G2MS	NA
CCT7	1	0	0	up	NA	2.03034e-06	-0.178247	0.588827	0.410579	0.0462937	0.129552	1.2337	1.36325	2_earlyLymphoid	3_proB_G2MS	NA
CD72	1	0	0	up	NA	6.82928e-14	-0.178352	0.964246	0.785894	NA	0.0514706	1.125	1.17647	2_earlyLymphoid	3_proB_G2MS	NA
HSD17B10	1	0	0	up	NA	2.81475e-05	-0.17854	0.72514	0.546599	1	0.0792005	1.05691	1.13611	2_earlyLymphoid	3_proB_G2MS	NA
UQCC2	1	0	0	up	NA	1.36243e-09	-0.178549	0.863687	0.685139	1	0.0258361	1.09016	1.116	2_earlyLymphoid	3_proB_G2MS	NA
PSMB7	1	0	0	up	NA	1.51746e-07	-0.178729	0.486034	0.307305	0.0883104	0.15751	1.31522	1.47273	2_earlyLymphoid	3_proB_G2MS	NA
MYL6B	1	0	0	up	NA	1.80146e-06	-0.178836	0.574302	0.395466	0.0825426	0.179446	1.23097	1.41042	2_earlyLymphoid	3_proB_G2MS	NA
MYB	1	0	0	up	NA	5.57684e-06	-0.179133	0.779888	0.600756	0.565619	0.204583	1.19289	1.39748	2_earlyLymphoid	3_proB_G2MS	NA
PSMD14	1	0	0	up	NA	2.11539e-06	-0.179211	0.739665	0.560453	1	-0.00699731	1.11588	1.10888	2_earlyLymphoid	3_proB_G2MS	NA
VPS26B	1	0	0	up	NA	2.48028e-07	-0.17922	0.878212	0.698992	1	0.058731	1.04587	1.1046	2_earlyLymphoid	3_proB_G2MS	NA
CEP55	1	0	0	up	NA	6.53424e-13	-0.179714	0.98324	0.803526	NA	1.11538	0	1.11538	2_earlyLymphoid	3_proB_G2MS	NA
RABL6	1	0	0	up	NA	1.66075e-10	-0.179729	0.903911	0.724181	1	0.0448126	1.04651	1.09132	2_earlyLymphoid	3_proB_G2MS	NA
SRSF9	1	0	0	up	NA	3.7418e-08	-0.179866	0.477095	0.297229	0.00308873	0.208988	1.33761	1.54659	2_earlyLymphoid	3_proB_G2MS	NA
CCNE2	1	0	0	up	NA	4.64457e-15	-0.179876	0.972067	0.792191	NA	1.07273	0	1.07273	2_earlyLymphoid	3_proB_G2MS	NA
MRPL28	1	0	0	up	NA	1.03669e-05	-0.179966	0.78324	0.603275	1	0.0750286	1.03608	1.11111	2_earlyLymphoid	3_proB_G2MS	NA
KIF23	1	0	0	up	NA	7.2032e-13	-0.18012	0.989944	0.809824	NA	1.13245	0	1.13245	2_earlyLymphoid	3_proB_G2MS	NA
HDGF	1	0	0	up	NA	4.90127e-06	-0.180294	0.830168	0.649874	1	0.0750189	1.03289	1.10791	2_earlyLymphoid	3_proB_G2MS	NA
RCC1	1	0	0	up	NA	1.21454e-08	-0.180337	0.87933	0.698992	1	-0.0163877	1.08333	1.06695	2_earlyLymphoid	3_proB_G2MS	NA
CBFB	1	0	0	up	NA	6.54848e-06	-0.180436	0.82905	0.648615	1	0.0862323	1.03922	1.12545	2_earlyLymphoid	3_proB_G2MS	NA
CCNB1	1	0	0	up	NA	2.10517e-13	-0.180444	0.967598	0.787154	NA	2.04734	0	2.04734	2_earlyLymphoid	3_proB_G2MS	NA
RBBP8	1	0	0	up	NA	4.91846e-09	-0.180562	0.907263	0.7267	1	0.0152684	1.07229	1.08756	2_earlyLymphoid	3_proB_G2MS	NA
C12orf23	1	0	0	up	NA	3.04427e-06	-0.180901	0.805587	0.624685	0.181582	0.186531	1.05172	1.23826	2_earlyLymphoid	3_proB_G2MS	NA
CENPE	1	0	0	up	NA	2.56546e-15	-0.180973	0.98324	0.802267	NA	1.28025	0	1.28025	2_earlyLymphoid	3_proB_G2MS	NA
BRCA2	1	0	0	up	NA	3.22343e-16	-0.181032	0.953073	0.77204	1	-0.025125	1.11905	1.09392	2_earlyLymphoid	3_proB_G2MS	NA
CSNK2B	1	0	0	up	NA	1.52303e-07	-0.181311	0.52514	0.343829	0.0222283	0.178548	1.27059	1.44914	2_earlyLymphoid	3_proB_G2MS	NA
MAP1LC3B	1	0	0	up	NA	2.10177e-08	-0.181363	0.712849	0.531486	0.890983	0.124419	1.20623	1.33065	2_earlyLymphoid	3_proB_G2MS	NA
CASC5	1	0	0	up	NA	3.69926e-14	-0.181419	0.969832	0.788413	NA	1.11905	0	1.11905	2_earlyLymphoid	3_proB_G2MS	NA
RRP7A	1	0	0	up	NA	4.18966e-07	-0.181573	0.820112	0.638539	1	0.119073	1.06211	1.18118	2_earlyLymphoid	3_proB_G2MS	NA
POLR2C	1	0	0	up	NA	6.0456e-07	-0.18222	0.775419	0.593199	1	0.0554041	1.07463	1.13003	2_earlyLymphoid	3_proB_G2MS	NA
ALG5	1	0	0	up	NA	1.51077e-06	-0.18224	0.765363	0.583123	1	0.0670839	1.08095	1.14804	2_earlyLymphoid	3_proB_G2MS	NA
POLD2	1	0	0	up	NA	9.86099e-09	-0.18299	0.739665	0.556675	0.965102	0.102992	1.09871	1.2017	2_earlyLymphoid	3_proB_G2MS	NA
PDZD11	1	0	0	up	NA	1.53734e-10	-0.183022	0.93743	0.754408	NA	0.0666667	1	1.06667	2_earlyLymphoid	3_proB_G2MS	NA
BCL2L12	1	0	0	up	NA	5.72893e-11	-0.183062	0.917318	0.734257	1	0.044063	1.02703	1.07109	2_earlyLymphoid	3_proB_G2MS	NA
IFI16	1	0	0	up	NA	7.07484e-05	-0.183163	0.579888	0.396725	0.000798306	0.252332	1.29255	1.54489	2_earlyLymphoid	3_proB_G2MS	NA
ID3	1	0	0	up	NA	3.42147e-15	-0.183512	0.973184	0.789673	NA	1.21557	0	1.21557	2_earlyLymphoid	3_proB_G2MS	NA
ARHGAP11B	1	0	0	up	NA	1.1608e-14	-0.183654	0.972067	0.788413	NA	1.07143	0	1.07143	2_earlyLymphoid	3_proB_G2MS	NA
PGK1	1	0	0	up	NA	1.53734e-10	-0.183881	0.356425	0.172544	0.0011247	0.288313	1.66146	1.94977	2_earlyLymphoid	3_proB_G2MS	NA
DCTN3	1	0	0	up	NA	1.8579e-06	-0.184897	0.694972	0.510076	0.0259646	0.208302	1.17216	1.38046	2_earlyLymphoid	3_proB_G2MS	NA
C4orf27	1	0	0	up	NA	2.9965e-06	-0.184925	0.823464	0.638539	1	0.0349094	1.06962	1.10453	2_earlyLymphoid	3_proB_G2MS	NA
SFPQ	1	0	0	up	NA	9.04485e-10	-0.184963	0.446927	0.261965	6.62433e-05	0.406978	1.51111	1.91809	2_earlyLymphoid	3_proB_G2MS	NA
TRA2B	1	0	0	up	NA	5.80904e-13	-0.185547	0.363128	0.177582	5.9676e-09	0.443921	1.71228	2.1562	2_earlyLymphoid	3_proB_G2MS	NA
AKR1B1	1	0	0	up	NA	3.64788e-09	-0.185749	0.688268	0.502519	1	0.130049	1.14337	1.27342	2_earlyLymphoid	3_proB_G2MS	NA
BAZ1A	1	0	0	up	NA	1.93069e-07	-0.185896	0.756425	0.570529	0.825652	0.124136	1.11927	1.2434	2_earlyLymphoid	3_proB_G2MS	NA
TCEB2	1	0	0	up	NA	1.445e-13	-0.185969	0.290503	0.104534	0	0.726551	1.68976	2.41632	2_earlyLymphoid	3_proB_G2MS	NA
TRAM1	1	0	0	up	NA	2.76011e-07	-0.186231	0.585475	0.399244	0.00189541	0.240491	1.24798	1.48847	2_earlyLymphoid	3_proB_G2MS	NA
ACADM	1	0	0	up	NA	3.61401e-06	-0.186278	0.703911	0.517632	1	0.11307	1.12453	1.2376	2_earlyLymphoid	3_proB_G2MS	NA
NDUFA5	1	0	0	up	NA	3.26291e-09	-0.186377	0.653631	0.467254	0.0127473	0.163227	1.16774	1.33097	2_earlyLymphoid	3_proB_G2MS	NA
KIF2C	1	0	0	up	NA	2.35258e-15	-0.18656	0.988827	0.802267	NA	1.09554	0	1.09554	2_earlyLymphoid	3_proB_G2MS	NA
IER3IP1-1	1	0	0	up	NA	9.36422e-08	-0.186807	0.719553	0.532746	1	0.0702097	1.0996	1.16981	2_earlyLymphoid	3_proB_G2MS	NA
CTGF	1	0	0	up	NA	3.50996e-19	-0.187148	0.974302	0.787154	NA	1.49112	0	1.49112	2_earlyLymphoid	3_proB_G2MS	NA
CMPK2	1	0	0	up	NA	4.25737e-15	-0.187207	0.944134	0.756927	1	0.0280829	1.06	1.08808	2_earlyLymphoid	3_proB_G2MS	NA
SF3B14	1	0	0	up	NA	5.14857e-10	-0.1876	0.386592	0.198992	0.123822	0.197546	1.47541	1.67296	2_earlyLymphoid	3_proB_G2MS	NA
FLI1	1	0	0	up	NA	1.85642e-06	-0.188723	0.813408	0.624685	1	0.082044	1.09581	1.17785	2_earlyLymphoid	3_proB_G2MS	NA
PUF60	1	0	0	up	NA	8.22256e-08	-0.188841	0.753073	0.564232	1	0.0650747	1.06787	1.13295	2_earlyLymphoid	3_proB_G2MS	NA
TEX30	1	0	0	up	NA	6.90938e-09	-0.189011	0.880447	0.691436	1	0.0874309	1.01869	1.10612	2_earlyLymphoid	3_proB_G2MS	NA
PSMC5	1	0	0	up	NA	1.62577e-09	-0.189362	0.630168	0.440806	1	0.0678534	1.20242	1.27027	2_earlyLymphoid	3_proB_G2MS	NA
DNTT	1	1	0	up	up	1.50752e-10	-0.189518	0.193296	0.00377834	0	5.72033	9.11911	14.8394	2_earlyLymphoid	3_proB_G2MS	NA
DNAJC8	1	0	0	up	NA	6.77643e-08	-0.189969	0.605587	0.415617	0.686301	0.126941	1.23513	1.36207	2_earlyLymphoid	3_proB_G2MS	NA
SF3A3	1	0	0	up	NA	3.24767e-09	-0.189982	0.813408	0.623426	1	0.0830713	1.02395	1.10702	2_earlyLymphoid	3_proB_G2MS	NA
HNRNPU	1	0	0	up	NA	5.02728e-12	-0.190379	0.32514	0.134761	1.41186e-11	0.516788	1.66225	2.17904	2_earlyLymphoid	3_proB_G2MS	NA
UBE2E3	1	0	0	up	NA	9.62299e-08	-0.190527	0.749721	0.559194	1	0.100536	1.16518	1.26571	2_earlyLymphoid	3_proB_G2MS	NA
SLIRP	1	0	0	up	NA	6.45825e-10	-0.190925	0.617877	0.426952	1	0.0613521	1.24854	1.30989	2_earlyLymphoid	3_proB_G2MS	NA
TAF15	1	0	0	up	NA	1.12965e-08	-0.190973	0.736313	0.54534	1	0.0814592	1.08475	1.1662	2_earlyLymphoid	3_proB_G2MS	NA
POLE3	1	0	0	up	NA	1.23927e-08	-0.191336	0.693855	0.502519	0.0650467	0.156629	1.11679	1.27342	2_earlyLymphoid	3_proB_G2MS	NA
DEPDC1B	1	0	0	up	NA	9.64596e-16	-0.191617	0.978771	0.787154	NA	1.15976	0	1.15976	2_earlyLymphoid	3_proB_G2MS	NA
RBBP4	1	0	0	up	NA	3.10697e-08	-0.191647	0.463687	0.27204	1.33111e-11	0.40927	1.32083	1.7301	2_earlyLymphoid	3_proB_G2MS	NA
NAP1L4	1	0	0	up	NA	3.18433e-08	-0.191668	0.810056	0.618388	1	0.115376	1.05294	1.16832	2_earlyLymphoid	3_proB_G2MS	NA
RPA2	1	0	0	up	NA	9.48764e-09	-0.191893	0.837989	0.646096	1	0.0248865	1.11034	1.13523	2_earlyLymphoid	3_proB_G2MS	NA
KDELR2	1	0	0	up	NA	2.83456e-07	-0.192086	0.668156	0.476071	0.267485	0.142248	1.12458	1.26683	2_earlyLymphoid	3_proB_G2MS	NA
UBE2I	1	0	0	up	NA	2.1045e-09	-0.192176	0.47933	0.287154	3.28771e-09	0.390626	1.33906	1.72968	2_earlyLymphoid	3_proB_G2MS	NA
SLC44A1	1	0	0	up	NA	4.50303e-08	-0.192971	0.859218	0.666247	1	0.105271	1.00794	1.11321	2_earlyLymphoid	3_proB_G2MS	NA
SHCBP1	1	0	0	up	NA	3.73009e-15	-0.193161	0.976536	0.783375	NA	1.05814	0	1.05814	2_earlyLymphoid	3_proB_G2MS	NA
ELAVL1	1	0	0	up	NA	3.59597e-08	-0.193184	0.67933	0.486146	0.00611421	0.189204	1.09756	1.28676	2_earlyLymphoid	3_proB_G2MS	NA
ASNA1	1	0	0	up	NA	2.41084e-08	-0.193192	0.817877	0.624685	1	0.0806398	1.03681	1.11745	2_earlyLymphoid	3_proB_G2MS	NA
PCMT1	1	0	0	up	NA	5.25882e-05	-0.193487	0.667039	0.473552	0.498596	0.136075	1.15101	1.28708	2_earlyLymphoid	3_proB_G2MS	NA
HSPA8	1	1	0	up	up	3.94558e-11	-0.193545	0.280447	0.0869018	2.28922e-14	1.24209	2.47516	3.71724	2_earlyLymphoid	3_proB_G2MS	NA
MPC2	1	0	0	up	NA	4.04842e-10	-0.193601	0.53743	0.343829	5.34469e-05	0.215569	1.26812	1.48369	2_earlyLymphoid	3_proB_G2MS	NA
DSCC1	1	0	0	up	NA	8.47401e-16	-0.193627	0.953073	0.759446	1	0.00473697	1.04762	1.05236	2_earlyLymphoid	3_proB_G2MS	NA
STIP1	1	0	0	up	NA	1.38966e-07	-0.193662	0.863687	0.670025	1	0.0494932	1.05738	1.10687	2_earlyLymphoid	3_proB_G2MS	NA
UGP2	1	0	0	up	NA	3.39466e-07	-0.194076	0.652514	0.458438	0.884646	0.121775	1.21543	1.33721	2_earlyLymphoid	3_proB_G2MS	NA
TTF1	1	0	0	up	NA	8.08132e-08	-0.194088	0.860335	0.666247	1	0.100075	1.032	1.13208	2_earlyLymphoid	3_proB_G2MS	NA
BARD1	1	0	0	up	NA	2.86121e-11	-0.194965	0.912849	0.717884	1	0.112179	1.01282	1.125	2_earlyLymphoid	3_proB_G2MS	NA
RHEB	1	0	0	up	NA	1.31661e-07	-0.195134	0.683799	0.488665	0.03631	0.197593	1.12014	1.31773	2_earlyLymphoid	3_proB_G2MS	NA
MRPL14	1	0	0	up	NA	1.07401e-06	-0.19528	0.751955	0.556675	1	0.0812602	1.12613	1.20739	2_earlyLymphoid	3_proB_G2MS	NA
PRKDC	1	0	0	up	NA	8.72624e-11	-0.195868	0.73743	0.541562	1	0.0970774	1.14468	1.24176	2_earlyLymphoid	3_proB_G2MS	NA
ENY2	1	0	0	up	NA	4.09572e-09	-0.195978	0.538547	0.342569	2.18208e-05	0.245763	1.25424	1.5	2_earlyLymphoid	3_proB_G2MS	NA
NELFE	1	0	0	up	NA	1.57291e-08	-0.196216	0.774302	0.578086	1	0.0253436	1.09406	1.1194	2_earlyLymphoid	3_proB_G2MS	NA
CKAP2L	1	0	0	up	NA	2.85716e-14	-0.196493	0.989944	0.793451	NA	1.10976	0	1.10976	2_earlyLymphoid	3_proB_G2MS	NA
PSMD8	1	0	0	up	NA	4.65216e-09	-0.196551	0.603352	0.406801	0.134809	0.159505	1.19718	1.35669	2_earlyLymphoid	3_proB_G2MS	NA
NUTF2	1	0	0	up	NA	2.35343e-10	-0.196899	0.640223	0.443325	0.00900669	0.194022	1.17702	1.37104	2_earlyLymphoid	3_proB_G2MS	NA
MAZ	1	0	0	up	NA	3.33585e-09	-0.197432	0.72514	0.527708	1	0.111317	1.12602	1.23733	2_earlyLymphoid	3_proB_G2MS	NA
ANAPC15	1	0	0	up	NA	1.51183e-09	-0.197495	0.764246	0.566751	1	0.0572027	1.17536	1.23256	2_earlyLymphoid	3_proB_G2MS	NA
RBM42	1	0	0	up	NA	1.45476e-06	-0.197499	0.83352	0.63602	1	0.0635378	1.04027	1.10381	2_earlyLymphoid	3_proB_G2MS	NA
RFC3	1	0	0	up	NA	7.98235e-15	-0.197606	0.921788	0.724181	1	-0.035486	1.08571	1.05023	2_earlyLymphoid	3_proB_G2MS	NA
CTCF	1	0	0	up	NA	1.35467e-08	-0.197622	0.842458	0.644836	1	0.0992908	1.04255	1.14184	2_earlyLymphoid	3_proB_G2MS	NA
TECR	1	0	0	up	NA	1.32805e-09	-0.197633	0.693855	0.496222	1	0.0847628	1.12774	1.2125	2_earlyLymphoid	3_proB_G2MS	NA
SPTBN1	1	0	0	up	NA	3.96546e-12	-0.197685	0.881564	0.683879	1	0.144065	1.04717	1.19124	2_earlyLymphoid	3_proB_G2MS	NA
AP2S1	1	0	0	up	NA	3.09222e-10	-0.197688	0.594413	0.396725	0.0006172	0.219857	1.19559	1.41545	2_earlyLymphoid	3_proB_G2MS	NA
SGOL2	1	0	0	up	NA	5.21497e-13	-0.197832	0.949721	0.751889	1	0.182064	1.06667	1.24873	2_earlyLymphoid	3_proB_G2MS	NA
JAK1	1	0	0	up	NA	6.62989e-11	-0.198166	0.778771	0.580605	1	0.0556921	1.15152	1.20721	2_earlyLymphoid	3_proB_G2MS	NA
TCF3	1	0	0	up	NA	2.73057e-15	-0.198175	0.917318	0.719144	1	0.134408	1.02703	1.16143	2_earlyLymphoid	3_proB_G2MS	NA
NONO	1	0	0	up	NA	2.81581e-09	-0.198268	0.441341	0.243073	0.00163332	0.210632	1.41	1.62063	2_earlyLymphoid	3_proB_G2MS	NA
UQCR10	1	0	0	up	NA	9.33401e-11	-0.19843	0.430168	0.231738	2.77324e-06	0.315783	1.41373	1.72951	2_earlyLymphoid	3_proB_G2MS	NA
UBA2	1	0	0	up	NA	9.32141e-08	-0.19875	0.694972	0.496222	1	0.108654	1.15385	1.2625	2_earlyLymphoid	3_proB_G2MS	NA
TCEB1	1	0	0	up	NA	1.28141e-09	-0.198987	0.574302	0.375315	0.00151965	0.182256	1.14436	1.32661	2_earlyLymphoid	3_proB_G2MS	NA
XRCC5	1	0	0	up	NA	1.69438e-08	-0.199042	0.47486	0.275819	0.0907287	0.2121	1.4766	1.6887	2_earlyLymphoid	3_proB_G2MS	NA
POLR2K	1	0	0	up	NA	3.953e-08	-0.199358	0.670391	0.471033	1	0.0730024	1.16271	1.23571	2_earlyLymphoid	3_proB_G2MS	NA
LITAF	1	0	0	up	NA	4.15445e-07	-0.19975	0.756425	0.556675	1	0.0881203	1.11927	1.20739	2_earlyLymphoid	3_proB_G2MS	NA
CENPA	1	0	0	up	NA	7.37988e-14	-0.199987	0.992179	0.792191	NA	1.58788	0	1.58788	2_earlyLymphoid	3_proB_G2MS	NA
MTF2	1	0	0	up	NA	8.91854e-07	-0.200397	0.711732	0.511335	0.124381	0.181311	1.15116	1.33247	2_earlyLymphoid	3_proB_G2MS	NA
RAD51C	1	0	0	up	NA	4.30704e-10	-0.200875	0.896089	0.695214	1	0.0503866	1.03226	1.08264	2_earlyLymphoid	3_proB_G2MS	NA
HDAC2	1	0	0	up	NA	3.93053e-08	-0.200933	0.509497	0.308564	0.113989	0.163781	1.33713	1.50091	2_earlyLymphoid	3_proB_G2MS	NA
MME	1	0	0	up	NA	1.51141e-07	-0.201053	0.805587	0.604534	1	0.0413647	1.26437	1.30573	2_earlyLymphoid	3_proB_G2MS	NA
CCT6A	1	0	0	up	NA	3.70249e-11	-0.201099	0.567598	0.366499	0.134809	0.114178	1.31525	1.42942	2_earlyLymphoid	3_proB_G2MS	NA
KHDRBS1	1	0	0	up	NA	1.1338e-10	-0.20113	0.408939	0.207809	2.33665e-11	0.430296	1.42344	1.85374	2_earlyLymphoid	3_proB_G2MS	NA
SNRPC	1	0	0	up	NA	3.48277e-10	-0.202035	0.589944	0.387909	0.0107228	0.146545	1.16621	1.31276	2_earlyLymphoid	3_proB_G2MS	NA
MCM5	1	0	0	up	NA	4.65931e-11	-0.202185	0.727374	0.525189	1	0.149106	1.34426	1.49337	2_earlyLymphoid	3_proB_G2MS	NA
SLC25A11	1	0	0	up	NA	1.49174e-08	-0.202557	0.823464	0.620907	1	0.0629547	1.06329	1.12625	2_earlyLymphoid	3_proB_G2MS	NA
SUMO1	1	0	0	up	NA	2.99051e-11	-0.202571	0.387709	0.185139	7.95135e-09	0.323983	1.39781	1.72179	2_earlyLymphoid	3_proB_G2MS	NA
SMARCB1	1	0	0	up	NA	7.41466e-09	-0.202647	0.634637	0.43199	0.0884755	0.167151	1.17431	1.34146	2_earlyLymphoid	3_proB_G2MS	NA
RFC2	1	0	0	up	NA	2.02813e-08	-0.202719	0.812291	0.609572	1	0.114171	1.05357	1.16774	2_earlyLymphoid	3_proB_G2MS	NA
TRABD	1	0	0	up	NA	4.45253e-08	-0.202769	0.643575	0.440806	0.0021836	0.215856	1.16928	1.38514	2_earlyLymphoid	3_proB_G2MS	NA
NDUFAF3	1	0	0	up	NA	2.2876e-07	-0.203097	0.690503	0.487406	0.0756985	0.169994	1.19856	1.36855	2_earlyLymphoid	3_proB_G2MS	NA
TXNDC17	1	0	0	up	NA	7.06107e-09	-0.203121	0.749721	0.546599	1	0.0762897	1.08482	1.16111	2_earlyLymphoid	3_proB_G2MS	NA
RPL39L	1	0	0	up	NA	4.53655e-12	-0.203193	0.927374	0.724181	1	0.083386	1.03077	1.11416	2_earlyLymphoid	3_proB_G2MS	NA
NUDT5	1	0	0	up	NA	1.12965e-08	-0.203749	0.715084	0.511335	0.665204	0.122266	1.10196	1.22423	2_earlyLymphoid	3_proB_G2MS	NA
HMGN3	1	0	0	up	NA	1.07592e-11	-0.204012	0.36648	0.162469	0	0.726631	1.55908	2.28571	2_earlyLymphoid	3_proB_G2MS	NA
MCM2	1	0	0	up	NA	2.25669e-12	-0.204428	0.868156	0.663728	1	0.0358979	1.11017	1.14607	2_earlyLymphoid	3_proB_G2MS	NA
NDUFB3	1	0	0	up	NA	3.65152e-07	-0.204656	0.608939	0.404282	0.375028	0.112896	1.2	1.3129	2_earlyLymphoid	3_proB_G2MS	NA
MINOS1	1	0	0	up	NA	8.30737e-11	-0.205186	0.624581	0.419395	1	0.0802216	1.23214	1.31236	2_earlyLymphoid	3_proB_G2MS	NA
NOP56	1	0	0	up	NA	1.10545e-08	-0.206121	0.646927	0.440806	0.133346	0.167037	1.27215	1.43919	2_earlyLymphoid	3_proB_G2MS	NA
NCAPH	1	0	0	up	NA	4.22757e-13	-0.20726	0.994413	0.787154	NA	1.05325	0	1.05325	2_earlyLymphoid	3_proB_G2MS	NA
HIST1H2AM	1	0	0	up	NA	4.42544e-18	-0.207339	0.95419	0.746851	1	0.180561	1.07317	1.25373	2_earlyLymphoid	3_proB_G2MS	NA
PDAP1	1	0	0	up	NA	3.37448e-10	-0.207728	0.683799	0.476071	1	0.0778404	1.16254	1.24038	2_earlyLymphoid	3_proB_G2MS	NA
SRRM1	1	0	0	up	NA	1.46499e-15	-0.207814	0.425698	0.217884	2.72797e-06	0.314755	1.55642	1.87118	2_earlyLymphoid	3_proB_G2MS	NA
HNRNPM	1	0	0	up	NA	6.34164e-16	-0.207869	0.326257	0.118388	6.4818e-14	0.542912	1.7728	2.31571	2_earlyLymphoid	3_proB_G2MS	NA
C21orf58	1	0	0	up	NA	1.01529e-16	-0.208152	0.967598	0.759446	NA	1.08901	0	1.08901	2_earlyLymphoid	3_proB_G2MS	NA
NDUFA2	1	0	0	up	NA	1.91122e-10	-0.208387	0.490503	0.282116	2.72657e-05	0.291667	1.27851	1.57018	2_earlyLymphoid	3_proB_G2MS	NA
ARPC5L	1	0	0	up	NA	3.23963e-11	-0.208561	0.687151	0.478589	1	0.0834541	1.175	1.25845	2_earlyLymphoid	3_proB_G2MS	NA
HNRNPA3	1	1	0	up	up	1.72758e-19	-0.209144	0.246927	0.0377834	0	1.72602	1.88131	3.60733	2_earlyLymphoid	3_proB_G2MS	NA
STAG3	1	0	0	up	NA	6.0633e-20	-0.209696	0.965363	0.755668	NA	0.262887	1	1.26289	2_earlyLymphoid	3_proB_G2MS	NA
NAA50	1	0	0	up	NA	4.94184e-11	-0.209707	0.81676	0.607053	1	0.0065666	1.12805	1.13462	2_earlyLymphoid	3_proB_G2MS	NA
BAZ1B	1	0	0	up	NA	8.05106e-10	-0.212206	0.826816	0.61461	1	0.0925996	1.08387	1.17647	2_earlyLymphoid	3_proB_G2MS	NA
E2F1	1	0	0	up	NA	9.1905e-20	-0.212396	0.944134	0.731738	1	0.0879812	1.02	1.10798	2_earlyLymphoid	3_proB_G2MS	NA
FANCI	1	0	0	up	NA	1.38825e-12	-0.212578	0.922905	0.710327	NA	0.1	1	1.1	2_earlyLymphoid	3_proB_G2MS	NA
MLXIP	1	0	0	up	NA	4.95694e-11	-0.213055	0.750838	0.537783	0.450456	0.196992	1.20628	1.40327	2_earlyLymphoid	3_proB_G2MS	NA
COPS6	1	0	0	up	NA	1.44474e-11	-0.213173	0.690503	0.47733	0.622722	0.155583	1.13357	1.28916	2_earlyLymphoid	3_proB_G2MS	NA
NINJ1	1	0	0	up	NA	2.26107e-11	-0.214097	0.861453	0.647355	1	0.0595622	1.07258	1.13214	2_earlyLymphoid	3_proB_G2MS	NA
LSM5	1	0	0	up	NA	1.61425e-12	-0.214273	0.414525	0.200252	6.12154e-10	0.443587	1.47137	1.91496	2_earlyLymphoid	3_proB_G2MS	NA
CHAF1A	1	0	0	up	NA	6.49067e-15	-0.214323	0.889385	0.675063	1	0.0882077	1.07071	1.15891	2_earlyLymphoid	3_proB_G2MS	NA
BACH2	1	0	0	up	NA	6.92884e-20	-0.214449	0.967598	0.753149	NA	1.20408	0	1.20408	2_earlyLymphoid	3_proB_G2MS	NA
SRSF10	1	0	0	up	NA	3.39318e-14	-0.214638	0.728492	0.513854	0.217207	0.159385	1.11523	1.27461	2_earlyLymphoid	3_proB_G2MS	NA
KIF15	1	0	0	up	NA	8.03883e-16	-0.214836	0.984358	0.769521	NA	1.0929	0	1.0929	2_earlyLymphoid	3_proB_G2MS	NA
CYB5A	1	0	0	up	NA	2.40853e-13	-0.214891	0.884916	0.670025	1	0.104462	1.02913	1.13359	2_earlyLymphoid	3_proB_G2MS	NA
SRSF1	1	0	0	up	NA	1.38595e-08	-0.215226	0.713966	0.498741	0.0859722	0.17427	1.11719	1.29146	2_earlyLymphoid	3_proB_G2MS	NA
TROAP	1	0	0	up	NA	5.1194e-18	-0.215282	0.97095	0.755668	NA	1.21649	0	1.21649	2_earlyLymphoid	3_proB_G2MS	NA
CRNDE	1	0	0	up	NA	2.93418e-18	-0.215424	0.969832	0.754408	NA	1.13846	0	1.13846	2_earlyLymphoid	3_proB_G2MS	NA
ODC1	1	0	0	up	NA	2.55751e-15	-0.215427	0.682682	0.467254	1	0.1363	1.21831	1.35461	2_earlyLymphoid	3_proB_G2MS	NA
ATAD5	1	0	0	up	NA	2.72707e-14	-0.216273	0.893855	0.677582	1	0.0305921	1.06316	1.09375	2_earlyLymphoid	3_proB_G2MS	NA
MCM6	1	0	0	up	NA	9.54496e-13	-0.216352	0.853631	0.63728	1	0.062606	1.15267	1.21528	2_earlyLymphoid	3_proB_G2MS	NA
GADD45A	1	0	0	up	NA	2.79091e-13	-0.216577	0.881564	0.664987	0.721523	0.184069	1.03774	1.2218	2_earlyLymphoid	3_proB_G2MS	NA
PSMG2	1	0	0	up	NA	1.35625e-10	-0.216746	0.652514	0.435768	1	0.1086	1.17042	1.27902	2_earlyLymphoid	3_proB_G2MS	NA
APOLD1	1	0	0	up	NA	1.03759e-16	-0.216846	0.958659	0.741814	NA	0.141463	1	1.14146	2_earlyLymphoid	3_proB_G2MS	NA
DYNLL1	1	0	0	up	NA	1.98655e-07	-0.21686	0.522905	0.306045	2.12238e-05	0.605899	1.64637	2.25227	2_earlyLymphoid	3_proB_G2MS	NA
GTF2A2	1	0	0	up	NA	4.90603e-11	-0.217069	0.630168	0.413098	0.0106329	0.18475	1.11782	1.30258	2_earlyLymphoid	3_proB_G2MS	NA
UBE2S	1	0	0	up	NA	3.82871e-17	-0.21713	0.956425	0.739295	NA	0.21256	1	1.21256	2_earlyLymphoid	3_proB_G2MS	NA
FOXM1	1	0	0	up	NA	7.11354e-19	-0.217213	0.985475	0.768262	NA	1.09239	0	1.09239	2_earlyLymphoid	3_proB_G2MS	NA
ERG	1	0	0	up	NA	1.49729e-10	-0.217268	0.886034	0.668766	1	0.0726534	1.04902	1.12167	2_earlyLymphoid	3_proB_G2MS	NA
RPA1	1	0	0	up	NA	2.40801e-11	-0.217508	0.834637	0.617128	0.562394	0.143848	1.03378	1.17763	2_earlyLymphoid	3_proB_G2MS	NA
MAGOHB	1	0	0	up	NA	7.20205e-09	-0.217871	0.792179	0.574307	1	0.0799135	1.05914	1.13905	2_earlyLymphoid	3_proB_G2MS	NA
HIST1H1B	1	0	0	up	NA	3.4471e-18	-0.218188	0.987709	0.769521	NA	1.20765	0	1.20765	2_earlyLymphoid	3_proB_G2MS	NA
SEPT7	1	0	0	up	NA	1.05284e-13	-0.218375	0.392179	0.173804	2.68991e-11	0.48238	1.54963	2.03201	2_earlyLymphoid	3_proB_G2MS	NA
PSMG1	1	0	0	up	NA	2.54973e-09	-0.21844	0.787709	0.56927	1	0.0988304	1.12632	1.22515	2_earlyLymphoid	3_proB_G2MS	NA
ORC6	1	0	0	up	NA	1.19947e-17	-0.21861	0.915084	0.696474	1	-0.0312841	1.11842	1.08714	2_earlyLymphoid	3_proB_G2MS	NA
C19orf48	1	0	0	up	NA	4.88541e-12	-0.218759	0.696089	0.47733	1	0.0921421	1.18015	1.27229	2_earlyLymphoid	3_proB_G2MS	NA
SRSF4	1	0	0	up	NA	3.09886e-10	-0.219234	0.811173	0.59194	1	0.0833151	1.07101	1.15432	2_earlyLymphoid	3_proB_G2MS	NA
FUS	1	0	0	up	NA	3.15158e-22	-0.219954	0.300559	0.0806045	0	0.98382	2.0655	3.04932	2_earlyLymphoid	3_proB_G2MS	NA
ANP32A	1	0	0	up	NA	3.32124e-11	-0.220006	0.488268	0.268262	8.36869e-10	0.370104	1.34934	1.71945	2_earlyLymphoid	3_proB_G2MS	NA
UQCRC1	1	0	0	up	NA	2.86121e-11	-0.220102	0.72514	0.505038	0.775459	0.112083	1.0813	1.19338	2_earlyLymphoid	3_proB_G2MS	NA
SIAH2	1	0	0	up	NA	1.16424e-11	-0.220165	0.764246	0.544081	1	0.131706	1.12796	1.25967	2_earlyLymphoid	3_proB_G2MS	NA
TUBG1	1	0	0	up	NA	1.77434e-17	-0.220928	0.946369	0.725441	1	0.116781	1.02083	1.13761	2_earlyLymphoid	3_proB_G2MS	NA
DCK	1	0	0	up	NA	5.40551e-08	-0.221902	0.592179	0.370277	1	0.0239178	1.37808	1.402	2_earlyLymphoid	3_proB_G2MS	NA
PPP4C	1	0	0	up	NA	5.74596e-11	-0.221906	0.661453	0.439547	0.106306	0.167212	1.09571	1.26292	2_earlyLymphoid	3_proB_G2MS	NA
MIS18A	1	0	0	up	NA	7.83358e-15	-0.222246	0.916201	0.693955	1	0.0638683	1.02667	1.09053	2_earlyLymphoid	3_proB_G2MS	NA
SRSF2	1	1	0	up	up	5.92392e-19	-0.222268	0.26257	0.0403023	0	1.43704	2.10758	3.54462	2_earlyLymphoid	3_proB_G2MS	NA
CDC6	1	0	0	up	NA	1.46343e-20	-0.222329	0.945251	0.722922	1	0.0864564	1.04082	1.12727	2_earlyLymphoid	3_proB_G2MS	NA
PTPRE	1	0	0	up	NA	8.06762e-12	-0.222507	0.854749	0.632242	1	0.123446	1.09231	1.21575	2_earlyLymphoid	3_proB_G2MS	NA
TXNDC12	1	0	0	up	NA	2.69683e-11	-0.223458	0.797765	0.574307	0.00520872	0.220896	1.02762	1.24852	2_earlyLymphoid	3_proB_G2MS	NA
UCP2	1	0	0	up	NA	1.02941e-11	-0.223659	0.76648	0.542821	0.0198828	0.210091	1.1866	1.39669	2_earlyLymphoid	3_proB_G2MS	NA
NDUFA6	1	0	0	up	NA	3.50414e-13	-0.223817	0.686034	0.462217	0.211964	0.1562	1.14591	1.30211	2_earlyLymphoid	3_proB_G2MS	NA
TUBA1B	1	1	0	up	up	0.000989449	-0.224581	0.224581	0	0	21.3727	5.59078	26.9635	2_earlyLymphoid	3_proB_G2MS	NA
HIRIP3	1	0	0	up	NA	8.64858e-15	-0.225741	0.918436	0.692695	1	0.0353694	1.05479	1.09016	2_earlyLymphoid	3_proB_G2MS	NA
EBP	1	0	0	up	NA	3.09044e-13	-0.226281	0.785475	0.559194	0.354895	0.140357	1.0625	1.20286	2_earlyLymphoid	3_proB_G2MS	NA
GLRX	1	0	0	up	NA	5.99621e-11	-0.226666	0.44581	0.219144	1	-0.127016	2.03024	1.90323	2_earlyLymphoid	3_proB_G2MS	NA
PIH1D1	1	0	0	up	NA	6.91777e-12	-0.226771	0.821229	0.594458	1	0.0554736	1.06875	1.12422	2_earlyLymphoid	3_proB_G2MS	NA
GABPB1	1	0	0	up	NA	2.11533e-12	-0.227182	0.897207	0.670025	1	0.0660471	1.02174	1.08779	2_earlyLymphoid	3_proB_G2MS	NA
DLGAP5	1	0	0	up	NA	4.72362e-18	-0.227288	0.985475	0.758186	NA	1.39583	0	1.39583	2_earlyLymphoid	3_proB_G2MS	NA
PTBP1	1	0	0	up	NA	7.51762e-14	-0.227331	0.678212	0.450882	0.646669	0.118916	1.16319	1.28211	2_earlyLymphoid	3_proB_G2MS	NA
MDH1	1	0	0	up	NA	4.05997e-09	-0.227366	0.588827	0.361461	0.0335761	0.152324	1.27174	1.42406	2_earlyLymphoid	3_proB_G2MS	NA
SELT	1	0	0	up	NA	1.0159e-12	-0.227493	0.667039	0.439547	5.80166e-07	0.297112	1.10738	1.40449	2_earlyLymphoid	3_proB_G2MS	NA
PPP1CC	1	0	0	up	NA	2.85716e-14	-0.228057	0.593296	0.365239	0.000918356	0.178724	1.22802	1.40675	2_earlyLymphoid	3_proB_G2MS	NA
RAN	1	1	0	up	up	1.6975e-19	-0.228138	0.265922	0.0377834	0	1.63486	2.34551	3.98037	2_earlyLymphoid	3_proB_G2MS	NA
NCAPH2	1	0	0	up	NA	9.1342e-18	-0.228382	0.927374	0.698992	NA	0.0753138	1	1.07531	2_earlyLymphoid	3_proB_G2MS	NA
TIFA	1	0	0	up	NA	5.10215e-20	-0.228789	0.934078	0.70529	1	0.192453	1.01695	1.2094	2_earlyLymphoid	3_proB_G2MS	NA
ATG3	1	0	0	up	NA	1.63066e-12	-0.228859	0.755307	0.526448	1	0.0420067	1.10959	1.1516	2_earlyLymphoid	3_proB_G2MS	NA
HNRNPA0	1	0	0	up	NA	4.54469e-22	-0.229157	0.317318	0.0881612	0	0.999993	1.71686	2.71685	2_earlyLymphoid	3_proB_G2MS	NA
U2AF1	1	0	0	up	NA	1.49981e-15	-0.229221	0.356425	0.127204	0	0.679293	1.58333	2.26263	2_earlyLymphoid	3_proB_G2MS	NA
RAC1	1	0	0	up	NA	3.74167e-14	-0.229553	0.472626	0.243073	1.13353e-08	0.389037	1.35805	1.74709	2_earlyLymphoid	3_proB_G2MS	NA
GMPS	1	0	0	up	NA	1.24171e-12	-0.230241	0.764246	0.534005	0.0810366	0.157974	1.06635	1.22432	2_earlyLymphoid	3_proB_G2MS	NA
HNRNPH3	1	0	0	up	NA	1.17172e-12	-0.23037	0.555307	0.324937	0.000445893	0.260435	1.26382	1.52425	2_earlyLymphoid	3_proB_G2MS	NA
ACP1	1	0	0	up	NA	5.08102e-14	-0.230998	0.52067	0.289673	0.000186684	0.251996	1.26573	1.51773	2_earlyLymphoid	3_proB_G2MS	NA
RBX1	1	0	0	up	NA	6.30851e-12	-0.231136	0.450279	0.219144	2.71457e-11	0.429242	1.37398	1.80323	2_earlyLymphoid	3_proB_G2MS	NA
HMCES	1	0	0	up	NA	1.08069e-12	-0.231813	0.890503	0.65869	1	0.0633707	1.05102	1.11439	2_earlyLymphoid	3_proB_G2MS	NA
SDHA	1	0	0	up	NA	1.20124e-09	-0.231946	0.750838	0.518892	0.22111	0.150036	1.09865	1.24869	2_earlyLymphoid	3_proB_G2MS	NA
PTGES3	1	1	0	up	up	1.65833e-21	-0.232588	0.280447	0.0478589	0	1.01495	1.89907	2.91402	2_earlyLymphoid	3_proB_G2MS	NA
TUBA4A	1	0	0	up	NA	7.82297e-20	-0.232891	0.911732	0.678841	0.568207	0.233855	1.07595	1.3098	2_earlyLymphoid	3_proB_G2MS	NA
TBC1D10C	1	0	0	up	NA	7.35699e-15	-0.233558	0.856983	0.623426	0.385269	0.163775	1.09375	1.25753	2_earlyLymphoid	3_proB_G2MS	NA
ERH	1	1	0	up	up	1.92636e-19	-0.233583	0.272626	0.0390428	0	1.21612	1.88479	3.10092	2_earlyLymphoid	3_proB_G2MS	NA
PRDX3	1	0	0	up	NA	1.54881e-12	-0.234339	0.672626	0.438287	0.97284	0.137896	1.15358	1.29148	2_earlyLymphoid	3_proB_G2MS	NA
KPNB1	1	0	0	up	NA	1.92422e-16	-0.234702	0.630168	0.395466	6.37725e-05	0.26352	1.21148	1.475	2_earlyLymphoid	3_proB_G2MS	NA
BTG1	1	0	0	up	NA	6.1243e-18	-0.234721	0.620112	0.38539	2.13686e-05	0.446553	1.72353	2.17008	2_earlyLymphoid	3_proB_G2MS	NA
UBE2L3	1	0	0	up	NA	4.79638e-14	-0.234859	0.549721	0.314861	0.00247934	0.20076	1.26799	1.46875	2_earlyLymphoid	3_proB_G2MS	NA
PSMB8	1	0	0	up	NA	8.41784e-12	-0.23512	0.488268	0.253149	1.85461e-07	0.390852	1.36463	1.75548	2_earlyLymphoid	3_proB_G2MS	NA
PPM1G	1	0	0	up	NA	8.82366e-14	-0.23525	0.635754	0.400504	0.00161226	0.219183	1.21779	1.43697	2_earlyLymphoid	3_proB_G2MS	NA
SVIP	1	0	0	up	NA	7.43327e-13	-0.235353	0.654749	0.419395	0.00556629	0.259468	1.24595	1.50542	2_earlyLymphoid	3_proB_G2MS	NA
PSMB6	1	0	0	up	NA	3.06067e-14	-0.235369	0.575419	0.34005	1.47282e-05	0.248092	1.25	1.49809	2_earlyLymphoid	3_proB_G2MS	NA
SYNE2	1	0	0	up	NA	9.20196e-18	-0.23582	0.987709	0.751889	NA	1.16751	0	1.16751	2_earlyLymphoid	3_proB_G2MS	NA
YWHAQ	1	0	0	up	NA	4.65403e-21	-0.236327	0.300559	0.0642317	0	0.84557	1.6901	2.53567	2_earlyLymphoid	3_proB_G2MS	NA
LBR	1	0	0	up	NA	1.79562e-14	-0.236905	0.791061	0.554156	0.1428	0.182392	1.12834	1.31073	2_earlyLymphoid	3_proB_G2MS	NA
NAA10	1	0	0	up	NA	1.46183e-15	-0.23698	0.681564	0.444584	0.456385	0.128631	1.16842	1.29705	2_earlyLymphoid	3_proB_G2MS	NA
RBM17	1	0	0	up	NA	1.36019e-13	-0.237161	0.660335	0.423174	0.706147	0.119283	1.18421	1.30349	2_earlyLymphoid	3_proB_G2MS	NA
SNRPA1	1	0	0	up	NA	6.89747e-15	-0.237391	0.757542	0.520151	0.602168	0.111216	1.10138	1.2126	2_earlyLymphoid	3_proB_G2MS	NA
MAGOH	1	0	0	up	NA	6.64702e-13	-0.237461	0.578771	0.34131	0.000240506	0.252923	1.18302	1.43595	2_earlyLymphoid	3_proB_G2MS	NA
ARPP21	1	0	0	up	NA	4.11958e-20	-0.237565	0.95419	0.716625	1	0.171599	1.21951	1.39111	2_earlyLymphoid	3_proB_G2MS	NA
SRSF7	1	0	0	up	NA	9.26958e-14	-0.237741	0.507263	0.269521	0.0168608	0.311404	1.53515	1.84655	2_earlyLymphoid	3_proB_G2MS	NA
SRP9	1	0	0	up	NA	9.14757e-20	-0.238542	0.312849	0.0743073	0	0.792135	1.73984	2.53197	2_earlyLymphoid	3_proB_G2MS	NA
SNRPD3	1	0	0	up	NA	3.56262e-13	-0.238578	0.579888	0.34131	0.000713499	0.212786	1.20213	1.41491	2_earlyLymphoid	3_proB_G2MS	NA
KIF11	1	0	0	up	NA	9.58584e-19	-0.238643	0.975419	0.736776	NA	1.1244	0	1.1244	2_earlyLymphoid	3_proB_G2MS	NA
NAE1	1	0	0	up	NA	1.18978e-14	-0.239621	0.690503	0.450882	0.103486	0.137027	1.15884	1.29587	2_earlyLymphoid	3_proB_G2MS	NA
MZT2B	1	0	0	up	NA	1.86058e-19	-0.239865	0.351955	0.112091	5.87366e-15	0.674089	1.57414	2.24823	2_earlyLymphoid	3_proB_G2MS	NA
S1PR4	1	0	0	up	NA	7.91621e-12	-0.239953	0.806704	0.566751	1	0.102618	1.15029	1.25291	2_earlyLymphoid	3_proB_G2MS	NA
CDCA8	1	0	0	up	NA	9.53772e-19	-0.240025	0.984358	0.744332	NA	1.34483	0	1.34483	2_earlyLymphoid	3_proB_G2MS	NA
MTHFD2	1	0	0	up	NA	1.2281e-19	-0.2401	0.87486	0.634761	1	0.082697	1.15179	1.23448	2_earlyLymphoid	3_proB_G2MS	NA
MT1X	1	0	0	up	NA	9.36777e-19	-0.240325	0.902793	0.662469	2.52057e-05	0.692229	1.06897	1.76119	2_earlyLymphoid	3_proB_G2MS	NA
IDH2	1	0	0	up	NA	6.20265e-16	-0.240579	0.415642	0.175063	0	0.550313	1.43595	1.98626	2_earlyLymphoid	3_proB_G2MS	NA
YWHAH	1	0	0	up	NA	1.86291e-12	-0.240778	0.671508	0.43073	0.000966155	0.213202	1.19388	1.40708	2_earlyLymphoid	3_proB_G2MS	NA
PBK	1	0	0	up	NA	2.61675e-16	-0.241407	0.993296	0.751889	NA	1.14213	0	1.14213	2_earlyLymphoid	3_proB_G2MS	NA
WDR76	1	0	0	up	NA	6.58879e-17	-0.241726	0.901676	0.65995	1	0.0387205	1.09091	1.12963	2_earlyLymphoid	3_proB_G2MS	NA
HMMR	1	0	0	up	NA	1.93538e-21	-0.241853	0.979888	0.738035	NA	1.72115	0	1.72115	2_earlyLymphoid	3_proB_G2MS	NA
PXMP2	1	0	0	up	NA	4.68018e-13	-0.24186	0.762011	0.520151	0.251554	0.147573	1.0939	1.24147	2_earlyLymphoid	3_proB_G2MS	NA
CDKN2C	1	0	0	up	NA	8.40536e-19	-0.243416	0.967598	0.724181	NA	1.12329	0	1.12329	2_earlyLymphoid	3_proB_G2MS	NA
SNRNP40	1	0	0	up	NA	4.06202e-14	-0.244036	0.794413	0.550378	0.600913	0.119489	1.05978	1.17927	2_earlyLymphoid	3_proB_G2MS	NA
PRPSAP1	1	0	0	up	NA	3.39967e-12	-0.244814	0.897207	0.652393	1	0.148551	1.03261	1.18116	2_earlyLymphoid	3_proB_G2MS	NA
RFC4	1	0	0	up	NA	5.0326e-15	-0.245137	0.87486	0.629723	1	0.0705782	1.08929	1.15986	2_earlyLymphoid	3_proB_G2MS	NA
LSM6	1	0	0	up	NA	1.06909e-13	-0.245227	0.686034	0.440806	0.0330499	0.172742	1.12456	1.2973	2_earlyLymphoid	3_proB_G2MS	NA
HNRNPD	1	0	0	up	NA	1.77499e-14	-0.245302	0.576536	0.331234	5.78802e-08	0.358412	1.20844	1.56685	2_earlyLymphoid	3_proB_G2MS	NA
SPCS2	1	0	0	up	NA	3.58306e-14	-0.245357	0.477095	0.231738	0	0.515588	1.36966	1.88525	2_earlyLymphoid	3_proB_G2MS	NA
CDK2	1	0	0	up	NA	3.24563e-19	-0.245769	0.909497	0.663728	1	0.0588154	1.01235	1.07116	2_earlyLymphoid	3_proB_G2MS	NA
EIF2S2	1	0	0	up	NA	8.82312e-16	-0.245772	0.622346	0.376574	0.0299127	0.205009	1.28994	1.49495	2_earlyLymphoid	3_proB_G2MS	NA
DAZAP1	1	0	0	up	NA	4.22757e-13	-0.246227	0.747486	0.501259	0.543924	0.130553	1.10177	1.23232	2_earlyLymphoid	3_proB_G2MS	NA
PDIA6	1	0	0	up	NA	2.97419e-15	-0.246719	0.496089	0.24937	9.31429e-06	0.380846	1.43459	1.81544	2_earlyLymphoid	3_proB_G2MS	NA
CDCA3	1	0	0	up	NA	6.3555e-15	-0.247562	0.994413	0.746851	NA	1.25373	0	1.25373	2_earlyLymphoid	3_proB_G2MS	NA
SUPT16H	1	0	0	up	NA	4.63009e-14	-0.24824	0.791061	0.542821	0.482406	0.15589	1.14439	1.30028	2_earlyLymphoid	3_proB_G2MS	NA
GLO1	1	0	0	up	NA	3.83865e-17	-0.248398	0.710615	0.462217	0.586269	0.11678	1.18533	1.30211	2_earlyLymphoid	3_proB_G2MS	NA
KPNA2	1	0	0	up	NA	1.74907e-16	-0.248793	0.865922	0.617128	2.05002e-06	0.682456	1.00833	1.69079	2_earlyLymphoid	3_proB_G2MS	NA
COPS3	1	0	0	up	NA	1.22839e-14	-0.249314	0.743017	0.493703	0.482861	0.1183	1.11304	1.23134	2_earlyLymphoid	3_proB_G2MS	NA
BTG3	1	0	0	up	NA	4.02704e-21	-0.249646	0.859218	0.609572	1	0.122632	1.10317	1.22581	2_earlyLymphoid	3_proB_G2MS	NA
CDC45	1	0	0	up	NA	3.28131e-22	-0.249915	0.936313	0.686398	1	0.056859	1.08772	1.14458	2_earlyLymphoid	3_proB_G2MS	NA
CHEK1	1	0	0	up	NA	4.56692e-17	-0.250053	0.865922	0.615869	1	0.0293716	1.10833	1.1377	2_earlyLymphoid	3_proB_G2MS	NA
VBP1	1	0	0	up	NA	5.73757e-16	-0.250103	0.697207	0.447103	0.239054	0.137044	1.11808	1.25513	2_earlyLymphoid	3_proB_G2MS	NA
PSMB2	1	0	0	up	NA	1.8596e-12	-0.250158	0.597765	0.347607	0.0164714	0.152531	1.22778	1.38031	2_earlyLymphoid	3_proB_G2MS	NA
PAQR4	1	0	0	up	NA	1.30378e-23	-0.250444	0.951955	0.701511	1	0.0927289	1.04651	1.13924	2_earlyLymphoid	3_proB_G2MS	NA
YBX3	1	0	0	up	NA	2.70303e-17	-0.250554	0.753073	0.502519	0.105293	0.189266	1.27149	1.46076	2_earlyLymphoid	3_proB_G2MS	NA
RFC5	1	0	0	up	NA	1.15749e-17	-0.251214	0.916201	0.664987	1	0.0761905	1.06667	1.14286	2_earlyLymphoid	3_proB_G2MS	NA
NDUFS6	1	0	0	up	NA	3.84872e-14	-0.251615	0.497207	0.245592	6.95131e-07	0.263179	1.31111	1.57429	2_earlyLymphoid	3_proB_G2MS	NA
CBX3	1	0	0	up	NA	5.80137e-17	-0.252341	0.412291	0.15995	2.95237e-15	0.531345	1.53612	2.06747	2_earlyLymphoid	3_proB_G2MS	NA
ABHD3	1	0	0	up	NA	9.75635e-19	-0.253184	0.910615	0.657431	1	0.111029	1.025	1.13603	2_earlyLymphoid	3_proB_G2MS	NA
POLR2J	1	0	0	up	NA	1.31612e-13	-0.253329	0.622346	0.369018	0.00985341	0.201048	1.20414	1.40519	2_earlyLymphoid	3_proB_G2MS	NA
RUVBL2	1	0	0	up	NA	1.39427e-15	-0.253562	0.788827	0.535264	1	0.107756	1.08466	1.19241	2_earlyLymphoid	3_proB_G2MS	NA
COX6A1	1	0	0	up	NA	4.56901e-19	-0.25435	0.386592	0.132242	0	0.500512	1.5082	2.00871	2_earlyLymphoid	3_proB_G2MS	NA
PSMA7	1	0	0	up	NA	8.65194e-23	-0.254449	0.336313	0.081864	0	0.649395	1.75253	2.40192	2_earlyLymphoid	3_proB_G2MS	NA
BLOC1S1	1	0	0	up	NA	3.13537e-15	-0.254647	0.592179	0.337531	8.80082e-05	0.279035	1.26849	1.54753	2_earlyLymphoid	3_proB_G2MS	NA
RNASEH2C	1	0	0	up	NA	5.3934e-16	-0.254774	0.670391	0.415617	5.98417e-08	0.326848	1.1322	1.45905	2_earlyLymphoid	3_proB_G2MS	NA
PTPLAD1	1	0	0	up	NA	3.15825e-16	-0.255091	0.865922	0.610831	1	0.0813107	1.04167	1.12298	2_earlyLymphoid	3_proB_G2MS	NA
SNRPB	1	0	0	up	NA	2.34692e-25	-0.255385	0.358659	0.103275	0	0.652194	1.65679	2.30899	2_earlyLymphoid	3_proB_G2MS	NA
RAP1B	1	0	0	up	NA	1.98906e-13	-0.256211	0.579888	0.323678	0.00145681	0.217946	1.26064	1.47858	2_earlyLymphoid	3_proB_G2MS	NA
HIST1H1D	1	0	0	up	NA	5.69518e-22	-0.256306	0.81676	0.560453	0.00359187	0.455972	1.23171	1.68768	2_earlyLymphoid	3_proB_G2MS	NA
NRM	1	0	0	up	NA	3.52723e-15	-0.256634	0.863687	0.607053	1	0.129939	1.06557	1.19551	2_earlyLymphoid	3_proB_G2MS	NA
ANAPC11	1	0	0	up	NA	9.53772e-19	-0.25751	0.559777	0.302267	4.44747e-09	0.406	1.28173	1.68773	2_earlyLymphoid	3_proB_G2MS	NA
PDLIM1	1	0	0	up	NA	1.18788e-19	-0.258565	0.878212	0.619647	0.333171	0.215171	1.11927	1.33444	2_earlyLymphoid	3_proB_G2MS	NA
HMGXB4	1	0	0	up	NA	1.56829e-18	-0.259722	0.859218	0.599496	1	0.109763	1.03175	1.14151	2_earlyLymphoid	3_proB_G2MS	NA
MCM4	1	0	0	up	NA	2.43871e-20	-0.260594	0.842458	0.581864	1	0.077352	1.10638	1.18373	2_earlyLymphoid	3_proB_G2MS	NA
RMI2	1	0	0	up	NA	1.26793e-20	-0.26074	0.910615	0.649874	1	0.0779676	1.0875	1.16547	2_earlyLymphoid	3_proB_G2MS	NA
FAM26F	1	0	0	up	NA	1.61826e-17	-0.261178	0.758659	0.497481	1.14056e-06	0.368908	1.15741	1.52632	2_earlyLymphoid	3_proB_G2MS	NA
TCF19	1	0	0	up	NA	1.31305e-20	-0.261534	0.934078	0.672544	1	-0.0247718	1.10169	1.07692	2_earlyLymphoid	3_proB_G2MS	NA
ACTL6A	1	0	0	up	NA	8.84926e-13	-0.261873	0.832402	0.570529	0.21754	0.155152	1.02667	1.18182	2_earlyLymphoid	3_proB_G2MS	NA
ILF2	1	0	0	up	NA	1.00974e-16	-0.262832	0.557542	0.29471	0.000329368	0.25202	1.29798	1.55	2_earlyLymphoid	3_proB_G2MS	NA
UBE2A	1	0	0	up	NA	1.52025e-14	-0.263555	0.759777	0.496222	0.0529994	0.170581	1.07442	1.245	2_earlyLymphoid	3_proB_G2MS	NA
SSBP2	1	0	0	up	NA	1.17172e-12	-0.263629	0.650279	0.38665	1.87127e-05	0.335089	1.30351	1.6386	2_earlyLymphoid	3_proB_G2MS	NA
PSMB3	1	0	0	up	NA	4.12289e-21	-0.264229	0.487151	0.222922	5.28847e-09	0.334255	1.35294	1.6872	2_earlyLymphoid	3_proB_G2MS	NA
TCTEX1D2	1	0	0	up	NA	1.10689e-15	-0.264392	0.832402	0.56801	1	0.0895238	1.05333	1.14286	2_earlyLymphoid	3_proB_G2MS	NA
LIG1	1	0	0	up	NA	9.62725e-21	-0.264681	0.899441	0.634761	1	0.0793103	1.1	1.17931	2_earlyLymphoid	3_proB_G2MS	NA
PRC1	1	0	0	up	NA	1.33043e-23	-0.264847	0.957542	0.692695	NA	0.0685936	1.07895	1.14754	2_earlyLymphoid	3_proB_G2MS	NA
SOD2	1	0	0	up	NA	3.61838e-20	-0.265114	0.678212	0.413098	0.0561242	0.317209	1.53472	1.85193	2_earlyLymphoid	3_proB_G2MS	NA
SEPT9	1	0	0	up	NA	6.89263e-19	-0.265291	0.587709	0.322418	0.0063535	0.197953	1.32249	1.52045	2_earlyLymphoid	3_proB_G2MS	NA
PAX5	1	0	0	up	NA	6.93802e-27	-0.265415	0.953073	0.687657	1	-0.0174731	1.16667	1.14919	2_earlyLymphoid	3_proB_G2MS	NA
ASPM	1	0	0	up	NA	4.4902e-23	-0.265498	0.982123	0.716625	NA	1.36	0	1.36	2_earlyLymphoid	3_proB_G2MS	NA
VPS29	1	0	0	up	NA	2.78068e-16	-0.265987	0.661453	0.395466	2.0889e-05	0.269018	1.15182	1.42083	2_earlyLymphoid	3_proB_G2MS	NA
HMGA1	1	1	0	up	up	3.57059e-22	-0.266435	0.360894	0.0944584	0	1.04989	1.84441	2.8943	2_earlyLymphoid	3_proB_G2MS	NA
E2F2	1	0	0	up	NA	8.6604e-20	-0.267022	0.989944	0.722922	NA	1.12273	0	1.12273	2_earlyLymphoid	3_proB_G2MS	NA
SYNGR1	1	0	0	up	NA	2.07522e-14	-0.26905	0.597765	0.328715	9.21509e-05	0.248572	1.35556	1.60413	2_earlyLymphoid	3_proB_G2MS	NA
EWSR1	1	0	0	up	NA	6.6775e-19	-0.269172	0.606704	0.337531	0.0592072	0.188202	1.24716	1.43536	2_earlyLymphoid	3_proB_G2MS	NA
RACGAP1	1	0	0	up	NA	6.03827e-21	-0.269296	0.972067	0.702771	NA	1.16525	0	1.16525	2_earlyLymphoid	3_proB_G2MS	NA
TSPAN13	1	0	0	up	NA	2.09995e-20	-0.269493	0.871508	0.602015	0.257603	0.182003	1.05217	1.23418	2_earlyLymphoid	3_proB_G2MS	NA
ESCO2	1	0	0	up	NA	3.14626e-21	-0.269825	0.987709	0.717884	NA	1.13839	0	1.13839	2_earlyLymphoid	3_proB_G2MS	NA
PFKL	1	0	0	up	NA	6.45859e-18	-0.270405	0.834637	0.564232	0.0113098	0.257108	1.06081	1.31792	2_earlyLymphoid	3_proB_G2MS	NA
GNG5	1	0	0	up	NA	1.03651e-17	-0.270815	0.55419	0.283375	0.000387249	0.251093	1.30075	1.55185	2_earlyLymphoid	3_proB_G2MS	NA
RALY	1	0	0	up	NA	6.73211e-18	-0.270917	0.573184	0.302267	5.5461e-10	0.371709	1.23298	1.60469	2_earlyLymphoid	3_proB_G2MS	NA
MIS18BP1	1	0	0	up	NA	1.37089e-20	-0.271273	0.748603	0.47733	0.153156	0.193092	1.14667	1.33976	2_earlyLymphoid	3_proB_G2MS	NA
FHIT	1	0	0	up	NA	4.91909e-14	-0.272714	0.727374	0.45466	6.19887e-05	0.416395	1.2418	1.6582	2_earlyLymphoid	3_proB_G2MS	NA
GTSE1	1	0	0	up	NA	5.98163e-23	-0.272771	0.984358	0.711587	NA	1.24017	0	1.24017	2_earlyLymphoid	3_proB_G2MS	NA
HAT1	1	0	0	up	NA	2.97272e-15	-0.273121	0.734078	0.460957	0.0393696	0.18562	1.11345	1.29907	2_earlyLymphoid	3_proB_G2MS	NA
PGAM1	1	0	0	up	NA	1.77434e-17	-0.273583	0.641341	0.367758	0.000102689	0.212868	1.17757	1.39044	2_earlyLymphoid	3_proB_G2MS	NA
HPS4	1	0	0	up	NA	4.99918e-16	-0.273773	0.758659	0.484887	3.72279e-05	0.36213	1.22222	1.58435	2_earlyLymphoid	3_proB_G2MS	NA
NDC80	1	0	0	up	NA	1.69555e-24	-0.273785	0.96648	0.692695	NA	1.18033	0	1.18033	2_earlyLymphoid	3_proB_G2MS	NA
HIST1H1C	1	0	0	up	NA	6.30932e-25	-0.274022	0.84581	0.571788	0.000320432	0.683887	1.30435	1.98824	2_earlyLymphoid	3_proB_G2MS	NA
PKMYT1	1	0	0	up	NA	6.81504e-26	-0.274334	0.972067	0.697733	NA	1.06667	0	1.06667	2_earlyLymphoid	3_proB_G2MS	NA
FDPS	1	0	0	up	NA	3.97147e-16	-0.274337	0.684916	0.410579	0.145295	0.163803	1.16312	1.32692	2_earlyLymphoid	3_proB_G2MS	NA
SKA3	1	0	0	up	NA	8.71632e-27	-0.274373	0.951955	0.677582	1	0.0357013	1.06977	1.10547	2_earlyLymphoid	3_proB_G2MS	NA
GINS2	1	0	0	up	NA	9.16248e-23	-0.274507	0.812291	0.537783	0.0281499	0.223109	1.2619	1.48501	2_earlyLymphoid	3_proB_G2MS	NA
BANF1	1	0	0	up	NA	3.38319e-18	-0.275347	0.597765	0.322418	0.000891193	0.232352	1.25278	1.48513	2_earlyLymphoid	3_proB_G2MS	NA
RAD51	1	0	0	up	NA	3.45692e-26	-0.275593	0.972067	0.696474	NA	1.10373	0	1.10373	2_earlyLymphoid	3_proB_G2MS	NA
UBE2N	1	0	0	up	NA	3.23583e-19	-0.27622	0.581006	0.304786	2.37532e-08	0.311623	1.192	1.50362	2_earlyLymphoid	3_proB_G2MS	NA
KIF20B	1	0	0	up	NA	3.13282e-21	-0.276261	0.917318	0.641058	0.895481	0.213656	1.08108	1.29474	2_earlyLymphoid	3_proB_G2MS	NA
SMC1A	1	0	0	up	NA	1.63095e-18	-0.276315	0.817877	0.541562	0.146224	0.196437	1.09202	1.28846	2_earlyLymphoid	3_proB_G2MS	NA
NPY	1	0	0	up	NA	3.53752e-26	-0.276525	0.92514	0.648615	0.165176	0.432622	1.20896	1.64158	2_earlyLymphoid	3_proB_G2MS	NA
DUT	1	1	0	up	up	1.50842e-27	-0.27659	0.32067	0.0440806	0	3.36637	2.57566	5.94203	2_earlyLymphoid	3_proB_G2MS	NA
SMARCA4	1	0	0	up	NA	3.13409e-16	-0.276595	0.746369	0.469773	0.000509348	0.225737	1.06167	1.28741	2_earlyLymphoid	3_proB_G2MS	NA
WDR34	1	0	0	up	NA	9.82393e-24	-0.277113	0.910615	0.633501	1	0.0440292	1.0625	1.10653	2_earlyLymphoid	3_proB_G2MS	NA
PA2G4	1	0	0	up	NA	6.26907e-24	-0.277265	0.404469	0.127204	0	0.87248	1.71482	2.5873	2_earlyLymphoid	3_proB_G2MS	NA
RBM8A	1	0	0	up	NA	1.59189e-21	-0.277759	0.509497	0.231738	4.6369e-07	0.338747	1.31207	1.65082	2_earlyLymphoid	3_proB_G2MS	NA
STRA13	1	0	0	up	NA	1.54161e-24	-0.278467	0.791061	0.512594	0.474384	0.203734	1.16578	1.36951	2_earlyLymphoid	3_proB_G2MS	NA
TSPAN14	1	0	0	up	NA	8.03326e-20	-0.27902	0.865922	0.586902	0.619014	0.166463	1.05	1.21646	2_earlyLymphoid	3_proB_G2MS	NA
TLE4	1	0	0	up	NA	9.54517e-19	-0.279864	0.72067	0.440806	1	0.153207	1.304	1.45721	2_earlyLymphoid	3_proB_G2MS	NA
WTAP	1	0	0	up	NA	1.05032e-19	-0.281139	0.641341	0.360202	0.526282	0.148282	1.30841	1.45669	2_earlyLymphoid	3_proB_G2MS	NA
KIFC1	1	0	0	up	NA	8.20592e-22	-0.281445	0.985475	0.70403	NA	1.19149	0	1.19149	2_earlyLymphoid	3_proB_G2MS	NA
PAG1	1	0	0	up	NA	3.58306e-14	-0.282095	0.653631	0.371537	0.000166028	0.327351	1.28387	1.61122	2_earlyLymphoid	3_proB_G2MS	NA
CCT5	1	0	0	up	NA	9.14757e-20	-0.285853	0.663687	0.377834	0.147188	0.187089	1.27243	1.45951	2_earlyLymphoid	3_proB_G2MS	NA
EZR	1	0	0	up	NA	7.00897e-22	-0.286225	0.759777	0.473552	0.00163157	0.273417	1.1907	1.46411	2_earlyLymphoid	3_proB_G2MS	NA
ITGB3BP	1	0	0	up	NA	2.54614e-21	-0.286269	0.808939	0.52267	0.19373	0.181765	1.11111	1.29288	2_earlyLymphoid	3_proB_G2MS	NA
RBBP7	1	0	0	up	NA	1.68481e-21	-0.286765	0.626816	0.34005	1.07552e-08	0.320656	1.19461	1.51527	2_earlyLymphoid	3_proB_G2MS	NA
XRCC6	1	0	0	up	NA	9.99634e-22	-0.2868	0.53743	0.25063	1.17559e-12	0.435781	1.31884	1.75462	2_earlyLymphoid	3_proB_G2MS	NA
NUDT21	1	0	0	up	NA	7.56801e-20	-0.287141	0.792179	0.505038	1	0.0756792	1.10753	1.18321	2_earlyLymphoid	3_proB_G2MS	NA
POU2AF1	1	0	0	up	NA	7.20028e-28	-0.287453	0.918436	0.630982	1	0.139838	1.0274	1.16724	2_earlyLymphoid	3_proB_G2MS	NA
ARL6IP1	1	1	0	up	up	3.15171e-17	-0.288357	0.743017	0.45466	0	2.09956	1.15217	3.25173	2_earlyLymphoid	3_proB_G2MS	NA
CDC20	1	0	0	up	NA	4.38835e-25	-0.289854	0.978771	0.688917	NA	2.30364	0	2.30364	2_earlyLymphoid	3_proB_G2MS	NA
RTN3	1	0	0	up	NA	5.49148e-17	-0.291503	0.70838	0.416877	5.5091e-08	0.318132	1.0728	1.39093	2_earlyLymphoid	3_proB_G2MS	NA
MZT1	1	0	0	up	NA	6.09259e-23	-0.291674	0.835754	0.544081	0.0390629	0.210978	1.06803	1.27901	2_earlyLymphoid	3_proB_G2MS	NA
TPGS2	1	0	0	up	NA	5.51252e-21	-0.292498	0.700559	0.40806	0.602168	0.113496	1.15672	1.27021	2_earlyLymphoid	3_proB_G2MS	NA
SPC24	1	0	0	up	NA	6.06863e-26	-0.292657	0.976536	0.683879	NA	1.22709	0	1.22709	2_earlyLymphoid	3_proB_G2MS	NA
NUDC	1	0	0	up	NA	2.17435e-21	-0.292881	0.648045	0.355164	0.00211993	0.194531	1.2	1.39453	2_earlyLymphoid	3_proB_G2MS	NA
NASP	1	1	0	up	up	3.12013e-26	-0.293231	0.397765	0.104534	0	1.10425	1.8423	2.94655	2_earlyLymphoid	3_proB_G2MS	NA
HN1	1	0	0	up	NA	5.19713e-21	-0.293924	0.758659	0.464736	2.95237e-15	0.943235	1.125	2.06824	2_earlyLymphoid	3_proB_G2MS	NA
HPRT1	1	0	0	up	NA	2.99267e-20	-0.29615	0.622346	0.326196	0.0313174	0.179815	1.2071	1.38692	2_earlyLymphoid	3_proB_G2MS	NA
RNASEH2A	1	0	0	up	NA	5.49788e-26	-0.296265	0.849162	0.552897	0.166437	0.181221	1.06667	1.24789	2_earlyLymphoid	3_proB_G2MS	NA
LRR1	1	0	0	up	NA	2.43845e-24	-0.296656	0.935196	0.638539	1	0.125616	1.01724	1.14286	2_earlyLymphoid	3_proB_G2MS	NA
DNMT1	1	0	0	up	NA	8.55687e-23	-0.29906	0.70838	0.40932	0.000788494	0.219142	1.22222	1.44136	2_earlyLymphoid	3_proB_G2MS	NA
CCDC34	1	0	0	up	NA	3.81301e-22	-0.299294	0.87486	0.575567	0.0262564	0.249099	1.05357	1.30267	2_earlyLymphoid	3_proB_G2MS	NA
CTNNAL1	1	0	0	up	NA	2.54502e-30	-0.300008	0.938547	0.638539	1	0.081343	1.05455	1.13589	2_earlyLymphoid	3_proB_G2MS	NA
ARL6IP6	1	0	0	up	NA	1.53702e-22	-0.300201	0.768715	0.468514	0.00415858	0.244705	1.09179	1.33649	2_earlyLymphoid	3_proB_G2MS	NA
RANBP1	1	1	0	up	up	9.98765e-31	-0.300318	0.351955	0.0516373	0	1.80296	2.03103	3.834	2_earlyLymphoid	3_proB_G2MS	NA
SMC3	1	0	0	up	NA	4.34493e-24	-0.300785	0.684916	0.384131	1.49979e-05	0.284428	1.24113	1.52556	2_earlyLymphoid	3_proB_G2MS	NA
HSPB11	1	0	0	up	NA	3.54234e-21	-0.30129	0.641341	0.34005	4.63965e-07	0.354338	1.24299	1.59733	2_earlyLymphoid	3_proB_G2MS	NA
C12orf57	1	0	0	up	NA	5.02096e-25	-0.302297	0.484916	0.18262	0	0.758119	1.49458	2.2527	2_earlyLymphoid	3_proB_G2MS	NA
NUF2	1	0	0	up	NA	5.56658e-24	-0.302997	0.984358	0.68136	NA	1.30435	0	1.30435	2_earlyLymphoid	3_proB_G2MS	NA
PSMC3	1	0	0	up	NA	4.57891e-23	-0.304887	0.66257	0.357683	0.000165648	0.250513	1.13576	1.38627	2_earlyLymphoid	3_proB_G2MS	NA
LSM3	1	0	0	up	NA	9.86241e-23	-0.305467	0.509497	0.20403	2.84693e-14	0.428693	1.33713	1.76582	2_earlyLymphoid	3_proB_G2MS	NA
CYCS	1	0	0	up	NA	8.96284e-29	-0.30555	0.538547	0.232997	0.000262696	0.271994	1.39467	1.66667	2_earlyLymphoid	3_proB_G2MS	NA
VRK1	1	0	0	up	NA	2.40967e-23	-0.306238	0.830168	0.523929	0.0262564	0.211988	1.06579	1.27778	2_earlyLymphoid	3_proB_G2MS	NA
HNRNPAB	1	0	0	up	NA	5.86767e-25	-0.307529	0.671508	0.36398	9.59902e-06	0.267461	1.21769	1.48515	2_earlyLymphoid	3_proB_G2MS	NA
ZFP36L1	1	0	0	up	NA	2.25747e-30	-0.307904	0.836872	0.528967	1	0.0131492	1.34247	1.35561	2_earlyLymphoid	3_proB_G2MS	NA
CDCA7	1	0	0	up	NA	1.9703e-23	-0.309175	0.688268	0.379093	1.76988e-05	0.313944	1.25806	1.57201	2_earlyLymphoid	3_proB_G2MS	NA
MYBL2	1	0	0	up	NA	3.14236e-32	-0.311304	0.958659	0.647355	NA	0.0546332	1.08108	1.13571	2_earlyLymphoid	3_proB_G2MS	NA
H2AFZ	1	1	0	up	up	2.14833e-09	-0.31159	0.312849	0.00125945	0	8.06784	3.4	11.4678	2_earlyLymphoid	3_proB_G2MS	NA
LSM4	1	0	0	up	NA	1.97516e-30	-0.312921	0.490503	0.177582	3.10118e-12	0.502059	1.46272	1.96478	2_earlyLymphoid	3_proB_G2MS	NA
CCDC109B	1	0	0	up	NA	2.06095e-24	-0.313629	0.772067	0.458438	0.0607064	0.159097	1.11765	1.27674	2_earlyLymphoid	3_proB_G2MS	NA
PSMB9	1	0	0	up	NA	4.86739e-23	-0.314303	0.499441	0.185139	0	0.650765	1.40179	2.05255	2_earlyLymphoid	3_proB_G2MS	NA
CENPK	1	0	0	up	NA	1.24016e-23	-0.314691	0.872626	0.557935	1	0.082771	1.10526	1.18803	2_earlyLymphoid	3_proB_G2MS	NA
HELLS	1	0	0	up	NA	5.67789e-29	-0.314888	0.772067	0.457179	0.000195315	0.269267	1.17157	1.44084	2_earlyLymphoid	3_proB_G2MS	NA
FAM111A	1	0	0	up	NA	8.31581e-25	-0.316255	0.860335	0.544081	0.330881	0.181856	1.064	1.24586	2_earlyLymphoid	3_proB_G2MS	NA
ERGIC1	1	0	0	up	NA	3.66091e-23	-0.316775	0.73743	0.420655	0.011266	0.26013	1.16596	1.42609	2_earlyLymphoid	3_proB_G2MS	NA
SNRPG	1	0	0	up	NA	2.51825e-27	-0.316861	0.47933	0.162469	1.1625e-14	0.601817	1.49142	2.09323	2_earlyLymphoid	3_proB_G2MS	NA
COX8A	1	1	0	up	up	1.91847e-34	-0.319253	0.401117	0.081864	0	1.29029	1.51493	2.80521	2_earlyLymphoid	3_proB_G2MS	NA
SKA2	1	0	0	up	NA	3.01761e-23	-0.319646	0.843575	0.523929	0.231705	0.204497	1.07857	1.28307	2_earlyLymphoid	3_proB_G2MS	NA
PSIP1	1	0	0	up	NA	1.36308e-25	-0.31985	0.52514	0.20529	0	0.57656	1.35529	1.93185	2_earlyLymphoid	3_proB_G2MS	NA
PPP1CA	1	0	0	up	NA	4.72715e-31	-0.32011	0.463687	0.143577	0	0.947181	1.38958	2.33676	2_earlyLymphoid	3_proB_G2MS	NA
MCM3	1	0	0	up	NA	1.3073e-25	-0.32049	0.698324	0.377834	1.78414e-08	0.491108	1.27407	1.76518	2_earlyLymphoid	3_proB_G2MS	NA
TMEM243	1	0	0	up	NA	1.1301e-29	-0.320661	0.825698	0.505038	0.00409928	0.284106	1.11538	1.39949	2_earlyLymphoid	3_proB_G2MS	NA
PHGDH	1	0	0	up	NA	1.08138e-23	-0.322425	0.782123	0.459698	5.20231e-05	0.353846	1.13333	1.48718	2_earlyLymphoid	3_proB_G2MS	NA
RAB11A	1	0	0	up	NA	5.2514e-24	-0.323348	0.596648	0.2733	4.79445e-07	0.270297	1.2687	1.53899	2_earlyLymphoid	3_proB_G2MS	NA
MRPL51	1	0	0	up	NA	7.12828e-24	-0.323471	0.605587	0.282116	1.58022e-11	0.418568	1.19547	1.61404	2_earlyLymphoid	3_proB_G2MS	NA
PARP1	1	0	0	up	NA	9.22008e-27	-0.325721	0.528492	0.202771	0	0.590837	1.34123	1.93207	2_earlyLymphoid	3_proB_G2MS	NA
CCDC167	1	0	0	up	NA	2.87351e-31	-0.326007	0.882682	0.556675	0.456909	0.165124	1.10476	1.26989	2_earlyLymphoid	3_proB_G2MS	NA
SGOL1	1	0	0	up	NA	1.04772e-28	-0.327657	0.968715	0.641058	NA	1.15789	0	1.15789	2_earlyLymphoid	3_proB_G2MS	NA
VDAC1	1	0	0	up	NA	3.36546e-31	-0.328259	0.518436	0.190176	0	0.789058	1.38979	2.17885	2_earlyLymphoid	3_proB_G2MS	NA
SSRP1	1	0	0	up	NA	2.16093e-27	-0.329405	0.648045	0.31864	5.88872e-10	0.358026	1.16508	1.52311	2_earlyLymphoid	3_proB_G2MS	NA
NCAPG	1	0	0	up	NA	1.48963e-28	-0.330014	0.979888	0.649874	NA	1.18705	0	1.18705	2_earlyLymphoid	3_proB_G2MS	NA
CKAP2	1	0	0	up	NA	7.67949e-29	-0.330049	0.890503	0.560453	0.0803874	0.283872	1.07143	1.3553	2_earlyLymphoid	3_proB_G2MS	NA
HNRNPR	1	0	0	up	NA	4.28719e-29	-0.332523	0.484916	0.152393	0	0.550141	1.41866	1.9688	2_earlyLymphoid	3_proB_G2MS	NA
HAUS1	1	0	0	up	NA	9.13765e-27	-0.333472	0.715084	0.381612	9.59902e-06	0.25491	1.11373	1.36864	2_earlyLymphoid	3_proB_G2MS	NA
PIN1	1	0	0	up	NA	5.67789e-29	-0.33406	0.700559	0.366499	9.7042e-08	0.311793	1.08582	1.39761	2_earlyLymphoid	3_proB_G2MS	NA
QRSL1	1	0	0	up	NA	9.34255e-32	-0.334886	0.921788	0.586902	0.0616795	0.310801	1.04286	1.35366	2_earlyLymphoid	3_proB_G2MS	NA
IDI1	1	0	0	up	NA	4.55462e-30	-0.334921	0.832402	0.497481	0.0178934	0.217444	1.09333	1.31078	2_earlyLymphoid	3_proB_G2MS	NA
TACC3	1	0	0	up	NA	1.47265e-28	-0.338115	0.916201	0.578086	0.023706	0.306269	1.04	1.34627	2_earlyLymphoid	3_proB_G2MS	NA
CLSPN	1	0	0	up	NA	3.99355e-37	-0.338502	0.932961	0.594458	0.265174	0.23147	1.06667	1.29814	2_earlyLymphoid	3_proB_G2MS	NA
ATAD2	1	0	0	up	NA	4.41085e-36	-0.339375	0.916201	0.576826	1	0.149048	1.05333	1.20238	2_earlyLymphoid	3_proB_G2MS	NA
MXD3	1	0	0	up	NA	3.80161e-28	-0.340796	0.905028	0.564232	0.00139404	0.382761	1.09412	1.47688	2_earlyLymphoid	3_proB_G2MS	NA
CD79A	1	0	0	up	NA	4.3036e-31	-0.341873	0.569832	0.22796	1	0.204258	2.67013	2.87439	2_earlyLymphoid	3_proB_G2MS	NA
SAC3D1	1	0	0	up	NA	5.39642e-31	-0.342482	0.901676	0.559194	0.148516	0.228636	1.01136	1.24	2_earlyLymphoid	3_proB_G2MS	NA
RAD21	1	0	0	up	NA	7.73293e-29	-0.343302	0.697207	0.353904	3.75984e-12	0.521223	1.15129	1.67251	2_earlyLymphoid	3_proB_G2MS	NA
FBXO5	1	0	0	up	NA	6.87688e-34	-0.343623	0.962011	0.618388	NA	0.16259	1.08824	1.25083	2_earlyLymphoid	3_proB_G2MS	NA
GGH	1	0	0	up	NA	2.54841e-30	-0.345384	0.849162	0.503778	0.303867	0.187554	1.08148	1.26904	2_earlyLymphoid	3_proB_G2MS	NA
CCNB2	1	0	0	up	NA	5.19011e-33	-0.345755	0.945251	0.599496	4.16175e-06	0.99846	1.02041	2.01887	2_earlyLymphoid	3_proB_G2MS	NA
CDCA7L	1	0	0	up	NA	5.63953e-33	-0.346394	0.762011	0.415617	0.0280403	0.265562	1.1784	1.44397	2_earlyLymphoid	3_proB_G2MS	NA
LINC01013	1	0	0	up	NA	3.66707e-28	-0.346794	0.986592	0.639798	NA	1.3986	0	1.3986	2_earlyLymphoid	3_proB_G2MS	NA
TOP2B	1	0	0	up	NA	8.92277e-24	-0.347404	0.67486	0.327456	8.3785e-10	0.495367	1.28179	1.77715	2_earlyLymphoid	3_proB_G2MS	NA
HMGB2	1	1	0	up	up	0.000270103	-0.348603	0.348603	0	0	13.9408	2.80103	16.7418	2_earlyLymphoid	3_proB_G2MS	NA
SLBP	1	0	0	up	NA	3.38424e-33	-0.35106	0.665922	0.314861	0	0.627127	1.31773	1.94485	2_earlyLymphoid	3_proB_G2MS	NA
RCSD1	1	0	0	up	NA	3.09497e-30	-0.351723	0.541899	0.190176	5.71675e-13	0.661878	1.56829	2.23017	2_earlyLymphoid	3_proB_G2MS	NA
CDCA5	1	0	0	up	NA	2.80653e-35	-0.358717	0.972067	0.61335	NA	1.21824	0	1.21824	2_earlyLymphoid	3_proB_G2MS	NA
CXCR4	1	1	0	up	up	1.55747e-39	-0.358908	0.44581	0.0869018	0	2.52709	2.19153	4.71862	2_earlyLymphoid	3_proB_G2MS	NA
SIVA1	1	0	0	up	NA	7.50277e-40	-0.359461	0.52067	0.161209	0	0.818528	1.43823	2.25676	2_earlyLymphoid	3_proB_G2MS	NA
EIF4A3	1	0	0	up	NA	1.44849e-37	-0.359786	0.854749	0.494962	0.0339679	0.239574	1.08462	1.32419	2_earlyLymphoid	3_proB_G2MS	NA
LCN6-1	1	0	0	up	NA	5.76758e-32	-0.360315	0.870391	0.510076	1	0.111404	1.28448	1.39589	2_earlyLymphoid	3_proB_G2MS	NA
YEATS4	1	0	0	up	NA	6.20293e-33	-0.360351	0.781006	0.420655	0.00442396	0.239929	1.11224	1.35217	2_earlyLymphoid	3_proB_G2MS	NA
KIF22	1	0	0	up	NA	1.55672e-36	-0.363182	0.907263	0.544081	0.0827485	0.26749	1.07229	1.33978	2_earlyLymphoid	3_proB_G2MS	NA
SMS	1	0	0	up	NA	3.21523e-36	-0.363268	0.649162	0.285894	3.60696e-12	0.386221	1.2293	1.61552	2_earlyLymphoid	3_proB_G2MS	NA
NUCKS1	1	1	0	up	up	2.52981e-37	-0.363926	0.455866	0.0919395	0	1.4409	1.62012	3.06103	2_earlyLymphoid	3_proB_G2MS	NA
MPP1	1	0	0	up	NA	6.65019e-30	-0.367201	0.855866	0.488665	9.67268e-06	0.380322	1.03101	1.41133	2_earlyLymphoid	3_proB_G2MS	NA
TFDP1	1	0	0	up	NA	2.14084e-35	-0.367805	0.762011	0.394207	0.000281429	0.298966	1.11268	1.41164	2_earlyLymphoid	3_proB_G2MS	NA
FEN1	1	0	0	up	NA	9.16787e-37	-0.367995	0.87933	0.511335	0.260914	0.187953	1.15741	1.34536	2_earlyLymphoid	3_proB_G2MS	NA
MND1	1	0	0	up	NA	2.86972e-36	-0.368852	0.941899	0.573048	1	0.123667	1.07692	1.20059	2_earlyLymphoid	3_proB_G2MS	NA
FAM111B	1	0	0	up	NA	2.46868e-40	-0.372468	0.953073	0.580605	0.760702	0.258902	1.07143	1.33033	2_earlyLymphoid	3_proB_G2MS	NA
CDCA4	1	0	0	up	NA	3.81063e-41	-0.37265	0.931844	0.559194	0.376397	0.242998	1.06557	1.30857	2_earlyLymphoid	3_proB_G2MS	NA
EBF1	1	0	0	up	NA	4.41085e-36	-0.37347	0.727374	0.353904	1	0.0521602	1.56967	1.62183	2_earlyLymphoid	3_proB_G2MS	NA
PKM	1	1	0	up	up	2.50492e-38	-0.375222	0.475978	0.100756	0	1.08554	1.61194	2.69748	2_earlyLymphoid	3_proB_G2MS	NA
HNRNPF	1	1	0	up	up	4.29365e-38	-0.376422	0.506145	0.129723	0	1.02659	1.50452	2.53111	2_earlyLymphoid	3_proB_G2MS	NA
TPX2	1	0	0	up	NA	5.2002e-33	-0.376898	0.977654	0.600756	NA	1.49211	0	1.49211	2_earlyLymphoid	3_proB_G2MS	NA
CBX5	1	0	0	up	NA	8.35966e-33	-0.376925	0.749721	0.372796	0.000110897	0.263662	1.13393	1.39759	2_earlyLymphoid	3_proB_G2MS	NA
EZH2	1	0	0	up	NA	2.22189e-38	-0.382314	0.855866	0.473552	0.211964	0.198268	1.10078	1.29904	2_earlyLymphoid	3_proB_G2MS	NA
CDKN3	1	0	0	up	NA	5.75953e-37	-0.382789	0.97095	0.588161	NA	1.41284	0	1.41284	2_earlyLymphoid	3_proB_G2MS	NA
DTYMK	1	0	0	up	NA	9.20085e-42	-0.38325	0.878212	0.494962	0.0733355	0.216775	1.05505	1.27182	2_earlyLymphoid	3_proB_G2MS	NA
GNG7	1	0	0	up	NA	5.80932e-39	-0.383289	0.858101	0.474811	0.00721646	0.25667	1.11024	1.36691	2_earlyLymphoid	3_proB_G2MS	NA
LAPTM5	1	1	0	up	up	6.89756e-48	-0.387185	0.441341	0.0541562	0	3.26545	2.15	5.41545	2_earlyLymphoid	3_proB_G2MS	NA
SPC25	1	0	0	up	NA	3.84757e-34	-0.387949	0.979888	0.59194	NA	1.29012	0	1.29012	2_earlyLymphoid	3_proB_G2MS	NA
CACYBP	1	0	0	up	NA	4.95843e-41	-0.389388	0.602235	0.212846	2.09159e-08	0.366319	1.27528	1.6416	2_earlyLymphoid	3_proB_G2MS	NA
CDT1	1	0	0	up	NA	4.59564e-39	-0.392165	0.827933	0.435768	0.134809	0.197037	1.16234	1.35938	2_earlyLymphoid	3_proB_G2MS	NA
LSMD1	1	0	0	up	NA	4.97823e-42	-0.396136	0.658101	0.261965	3.60654e-08	0.38107	1.28105	1.66212	2_earlyLymphoid	3_proB_G2MS	NA
CCNA2	1	0	0	up	NA	9.12053e-30	-0.400666	0.988827	0.588161	NA	1.25994	0	1.25994	2_earlyLymphoid	3_proB_G2MS	NA
GMNN	1	0	0	up	NA	1.49934e-45	-0.401858	0.880447	0.478589	0.28559	0.196713	1.1028	1.29952	2_earlyLymphoid	3_proB_G2MS	NA
SAE1	1	0	0	up	NA	7.50277e-40	-0.402446	0.865922	0.463476	0.00520246	0.25939	1.08333	1.34272	2_earlyLymphoid	3_proB_G2MS	NA
PTTG1	1	1	0	up	up	7.29301e-40	-0.403235	0.820112	0.416877	0	1.84389	1.23602	3.07991	2_earlyLymphoid	3_proB_G2MS	NA
DEK	1	1	0	up	up	4.09728e-46	-0.404087	0.456983	0.0528967	0	1.64403	1.66049	3.30452	2_earlyLymphoid	3_proB_G2MS	NA
BUB3	1	0	0	up	NA	2.30217e-40	-0.40571	0.77095	0.365239	0	0.71808	1.10732	1.8254	2_earlyLymphoid	3_proB_G2MS	NA
CENPF	1	1	0	up	up	1.11632e-44	-0.405861	0.90838	0.502519	5.94636e-05	1.21893	1.23171	2.45063	2_earlyLymphoid	3_proB_G2MS	NA
CENPH	1	0	0	up	NA	4.14655e-44	-0.40894	0.765363	0.356423	0.00894369	0.222635	1.23333	1.45597	2_earlyLymphoid	3_proB_G2MS	NA
RRM1	1	0	0	up	NA	3.41974e-42	-0.4111	0.877095	0.465995	0.0980778	0.227187	1.14545	1.37264	2_earlyLymphoid	3_proB_G2MS	NA
VPREB1	1	1	0	up	up	8.85456e-39	-0.414608	0.443575	0.0289673	0	3.1198	3.13052	6.25032	2_earlyLymphoid	3_proB_G2MS	NA
UBE2T	1	0	0	up	NA	3.00902e-44	-0.415167	0.944134	0.528967	0.024911	0.374439	1.04	1.41444	2_earlyLymphoid	3_proB_G2MS	NA
ASF1B	1	0	0	up	NA	2.5305e-47	-0.418377	0.948603	0.530227	1	0.177293	1.17391	1.35121	2_earlyLymphoid	3_proB_G2MS	NA
DHFR	1	0	0	up	NA	6.0355e-50	-0.419265	0.852514	0.433249	0.0192252	0.300808	1.19697	1.49778	2_earlyLymphoid	3_proB_G2MS	NA
CDK1	1	0	0	up	NA	2.05214e-43	-0.422684	0.964246	0.541562	NA	0.391484	1.125	1.51648	2_earlyLymphoid	3_proB_G2MS	NA
LEF1	1	0	0	up	NA	3.20686e-47	-0.426541	0.924022	0.497481	1	0.0839968	1.27941	1.36341	2_earlyLymphoid	3_proB_G2MS	NA
CCND3	1	1	0	up	up	1.66896e-48	-0.427049	0.593296	0.166247	0	1.86609	1.56593	3.43202	2_earlyLymphoid	3_proB_G2MS	NA
TMPO	1	0	0	up	NA	4.54165e-47	-0.427082	0.791061	0.36398	7.35687e-07	0.350463	1.16043	1.51089	2_earlyLymphoid	3_proB_G2MS	NA
ATP1B3	1	0	0	up	NA	2.19717e-46	-0.43018	0.637989	0.207809	2.95237e-15	0.530133	1.28704	1.81717	2_earlyLymphoid	3_proB_G2MS	NA
RAD51AP1	1	0	0	up	NA	8.39624e-49	-0.431172	0.917318	0.486146	1	0.199457	1.12162	1.32108	2_earlyLymphoid	3_proB_G2MS	NA
CD9	1	0	0	up	NA	7.82531e-47	-0.433877	0.965363	0.531486	NA	1.19355	1.32258	2.51613	2_earlyLymphoid	3_proB_G2MS	NA
SNX2	1	0	0	up	NA	2.5902e-48	-0.434697	0.760894	0.326196	3.28771e-09	0.404673	1.14486	1.54953	2_earlyLymphoid	3_proB_G2MS	NA
CMTM7	1	0	0	up	NA	2.20669e-47	-0.435913	0.711732	0.275819	0	0.618072	1.29845	1.91652	2_earlyLymphoid	3_proB_G2MS	NA
CMTM8	1	0	0	up	NA	2.22079e-52	-0.43743	0.93743	0.5	1.28154e-05	0.855748	1.05357	1.90932	2_earlyLymphoid	3_proB_G2MS	NA
CENPN	1	0	0	up	NA	1.38168e-49	-0.441797	0.922905	0.481108	0.248241	0.240502	1.04348	1.28398	2_earlyLymphoid	3_proB_G2MS	NA
SOCS2	1	0	0	up	NA	8.31661e-48	-0.443588	0.651397	0.207809	8.76273e-05	0.496296	1.76603	2.26232	2_earlyLymphoid	3_proB_G2MS	NA
HMGB3	1	0	0	up	NA	8.11424e-54	-0.446384	0.867039	0.420655	3.44752e-07	0.580764	1.13445	1.71522	2_earlyLymphoid	3_proB_G2MS	NA
H2AFV	1	1	0	up	up	5.11048e-54	-0.446829	0.497207	0.0503778	0	1.61309	1.43333	3.04642	2_earlyLymphoid	3_proB_G2MS	NA
CALM3	1	0	0	up	NA	1.32621e-51	-0.453605	0.681564	0.22796	0	0.909144	1.17895	2.08809	2_earlyLymphoid	3_proB_G2MS	NA
MCM7	1	0	0	up	NA	2.43542e-56	-0.45407	0.658101	0.20403	0	0.97004	1.49673	2.46677	2_earlyLymphoid	3_proB_G2MS	NA
TMEM106C	1	0	0	up	NA	1.41871e-56	-0.460341	0.886034	0.425693	0.0621433	0.258385	1.10784	1.36623	2_earlyLymphoid	3_proB_G2MS	NA
CENPM	1	0	0	up	NA	5.94414e-56	-0.461644	0.935196	0.473552	1	0.140488	1.18966	1.33014	2_earlyLymphoid	3_proB_G2MS	NA
RPA3	1	0	0	up	NA	7.94514e-56	-0.469002	0.67933	0.210327	1.1439e-13	0.476107	1.25436	1.73046	2_earlyLymphoid	3_proB_G2MS	NA
CARHSP1	1	0	0	up	NA	3.59325e-57	-0.474119	0.639106	0.164987	0	0.960705	1.17957	2.14027	2_earlyLymphoid	3_proB_G2MS	NA
DNAJC9	1	0	0	up	NA	2.17989e-61	-0.478881	0.779888	0.301008	2.5546e-06	0.399744	1.21827	1.61802	2_earlyLymphoid	3_proB_G2MS	NA
CKS2	1	0	0	up	NA	1.43243e-57	-0.480346	0.817877	0.337531	3.78444e-13	0.994833	1.20859	2.20342	2_earlyLymphoid	3_proB_G2MS	NA
DDX39A	1	0	0	up	NA	1.39037e-57	-0.485359	0.758659	0.2733	0	0.568811	1.12963	1.69844	2_earlyLymphoid	3_proB_G2MS	NA
CENPW	1	0	0	up	NA	2.8952e-60	-0.489549	0.834637	0.345088	2.08977e-07	0.404262	1.14189	1.54615	2_earlyLymphoid	3_proB_G2MS	NA
USP1	1	0	0	up	NA	9.21664e-63	-0.49125	0.751955	0.260705	0	0.555504	1.21622	1.77172	2_earlyLymphoid	3_proB_G2MS	NA
ANP32E	1	0	0	up	NA	8.09634e-62	-0.491681	0.817877	0.326196	2.75068e-11	0.701978	1.22699	1.92897	2_earlyLymphoid	3_proB_G2MS	NA
TUBB4B	1	1	0	up	up	1.81804e-61	-0.493043	0.836872	0.343829	0	1.97716	1.23973	3.21689	2_earlyLymphoid	3_proB_G2MS	NA
AURKB	1	0	0	up	NA	2.46066e-47	-0.497521	0.979888	0.482368	NA	1.87591	0	1.87591	2_earlyLymphoid	3_proB_G2MS	NA
LMNB1	1	0	0	up	NA	1.12074e-59	-0.499095	0.818994	0.319899	3.02781e-10	0.601852	1.18519	1.78704	2_earlyLymphoid	3_proB_G2MS	NA
SMC2	1	0	0	up	NA	5.00992e-63	-0.500031	0.841341	0.34131	2.7153e-07	0.435987	1.1338	1.56979	2_earlyLymphoid	3_proB_G2MS	NA
UBE2C	1	0	0	up	NA	7.17561e-57	-0.50077	0.964246	0.463476	NA	1.5782	1.46875	3.04695	2_earlyLymphoid	3_proB_G2MS	NA
CENPU	1	0	0	up	NA	7.78266e-69	-0.508259	0.855866	0.347607	0.000515186	0.400766	1.20155	1.60232	2_earlyLymphoid	3_proB_G2MS	NA
H2AFX	1	0	0	up	NA	4.67925e-67	-0.520005	0.931844	0.411839	0.0762462	0.454979	1.21311	1.66809	2_earlyLymphoid	3_proB_G2MS	NA
CKS1B	1	0	0	up	NA	3.8196e-74	-0.540819	0.807821	0.267003	0	0.996484	1.19767	2.19416	2_earlyLymphoid	3_proB_G2MS	NA
AKAP12	1	0	0	up	NA	2.90809e-49	-0.546355	0.982123	0.435768	NA	1.98661	0	1.98661	2_earlyLymphoid	3_proB_G2MS	NA
KIAA0101	1	1	0	up	up	8.93399e-69	-0.553258	0.601117	0.0478589	0	2.25008	2.45098	4.70106	2_earlyLymphoid	3_proB_G2MS	NA
BIRC5	1	0	0	up	NA	6.66449e-76	-0.563943	0.932961	0.369018	0.000343237	0.792315	1.38333	2.17565	2_earlyLymphoid	3_proB_G2MS	NA
MAD2L1	1	0	0	up	NA	8.55051e-80	-0.565175	0.804469	0.239295	0	0.605809	1.16571	1.77152	2_earlyLymphoid	3_proB_G2MS	NA
TK1	1	0	0	up	NA	1.25311e-81	-0.566379	0.903911	0.337531	0.258379	0.32735	1.5814	1.90875	2_earlyLymphoid	3_proB_G2MS	NA
ZWINT	1	0	0	up	NA	1.09908e-79	-0.574402	0.880447	0.306045	0.00585756	0.346117	1.20561	1.55172	2_earlyLymphoid	3_proB_G2MS	NA
TOP2A	1	0	0	up	NA	5.71905e-71	-0.57593	0.957542	0.381612	NA	1.50407	1.5	3.00407	2_earlyLymphoid	3_proB_G2MS	NA
TYMS	1	1	0	up	up	3.59554e-78	-0.584646	0.651397	0.0667506	0	2.47487	2.13782	4.61269	2_earlyLymphoid	3_proB_G2MS	NA
RRM2	1	0	0	up	NA	7.66344e-74	-0.598031	0.962011	0.36398	NA	0.413978	1.41176	1.82574	2_earlyLymphoid	3_proB_G2MS	NA
MAD2L2	1	0	0	up	NA	3.31788e-88	-0.603526	0.8	0.196474	0	0.824486	1.12849	1.95298	2_earlyLymphoid	3_proB_G2MS	NA
SMC4	1	1	0	up	up	1.0773e-90	-0.611206	0.808939	0.197733	0	1.14568	1.18713	2.33281	2_earlyLymphoid	3_proB_G2MS	NA
MKI67	1	0	0	up	NA	8.44311e-83	-0.61611	0.948603	0.332494	0.0015116	1.06349	1.34783	2.41132	2_earlyLymphoid	3_proB_G2MS	NA
CD79B	1	1	0	up	up	6.19414e-98	-0.662432	0.732961	0.070529	0	2.96873	2.14644	5.11518	2_earlyLymphoid	3_proB_G2MS	NA
NUSAP1	1	1	0	up	up	2.04118e-99	-0.677984	0.93743	0.259446	1.00674e-09	1.8869	1.41071	3.29762	2_earlyLymphoid	3_proB_G2MS	NA
VPREB3	1	1	0	up	up	1.95913e-111	-0.717587	0.794413	0.0768262	0	3.62621	3.33696	6.96317	2_earlyLymphoid	3_proB_G2MS	NA
PTMA	0	1	0	NA	up	NA	0	0	0	0	30.5674	35.1631	65.7305	2_earlyLymphoid	3_proB_G2MS	NA
HMGB1	0	1	0	NA	up	0.0644267	-0.0156425	0.0156425	0	0	22.6572	10.8604	33.5176	2_earlyLymphoid	3_proB_G2MS	NA
HMGN2	0	1	0	NA	up	0.00152949	-0.149721	0.149721	0	0	12.3785	4.74244	17.1209	2_earlyLymphoid	3_proB_G2MS	NA
STMN1	0	1	0	NA	up	0.00870198	-0.073743	0.073743	0	0	12.2652	5.70205	17.9673	2_earlyLymphoid	3_proB_G2MS	NA
ACTB	0	1	0	NA	up	0.446348	-0.00446927	0.00446927	0	0	11.4457	15.5455	26.9912	2_earlyLymphoid	3_proB_G2MS	NA
GAPDH	0	1	0	NA	up	0.818558	-0.00111732	0.00111732	0	0	10.1754	13.4329	23.6083	2_earlyLymphoid	3_proB_G2MS	NA
TMSB4X	0	1	0	NA	up	NA	0	0	0	2.31041e-07	5.67927	30.5777	36.2569	2_earlyLymphoid	3_proB_G2MS	NA
H3F3A	0	1	0	NA	up	0.721592	-0.00111732	0.00111732	0	0	4.228	8.38031	12.6083	2_earlyLymphoid	3_proB_G2MS	NA
PPIA	0	1	0	NA	up	0.0499773	-0.0301676	0.0301676	0	0	4.1017	4.90207	9.00378	2_earlyLymphoid	3_proB_G2MS	NA
HSP90AA1	0	1	0	NA	up	0.000142805	-0.058223	0.0670391	0.00881612	0	3.86606	4.05389	7.91995	2_earlyLymphoid	3_proB_G2MS	NA
UBB	0	1	0	NA	up	0.00824237	-0.0383561	0.0648045	0.0264484	0	3.51679	3.96057	7.47736	2_earlyLymphoid	3_proB_G2MS	NA
CFL1	0	1	0	NA	up	0.0014152	-0.0434333	0.0446927	0.00125945	0	2.81991	4.05146	6.87137	2_earlyLymphoid	3_proB_G2MS	NA
CALM2	0	1	0	NA	up	4.23414e-06	-0.0953196	0.131844	0.0365239	0	2.80927	3.2574	6.06667	2_earlyLymphoid	3_proB_G2MS	NA
PFN1	0	1	0	NA	up	0.000150091	-0.0576742	0.0614525	0.00377834	0	2.51881	3.66071	6.17952	2_earlyLymphoid	3_proB_G2MS	NA
YBX1	0	1	0	NA	up	0.0170101	-0.0424581	0.0424581	0	0	2.31353	4.88798	7.20151	2_earlyLymphoid	3_proB_G2MS	NA
ARHGDIB	0	1	0	NA	up	0.000563304	-0.0537537	0.0625698	0.00881612	0	2.16014	3.21216	5.3723	2_earlyLymphoid	3_proB_G2MS	NA
HMGN1	0	1	0	NA	up	0.000176482	-0.0516612	0.0592179	0.00755668	0	1.79115	3.26722	5.05838	2_earlyLymphoid	3_proB_G2MS	NA
SUMO2	0	1	0	NA	up	0.000361001	-0.0614328	0.0715084	0.0100756	0	1.52983	2.85439	4.38422	2_earlyLymphoid	3_proB_G2MS	NA
H2AFY	0	1	0	NA	up	0.000382666	-0.0670194	0.077095	0.0100756	0	1.42642	4.17918	5.6056	2_earlyLymphoid	3_proB_G2MS	NA
HLA-DRA	0	1	0	NA	up	7.52991e-05	-0.0548513	0.073743	0.0188917	8.9183e-11	1.40053	6.82027	8.2208	2_earlyLymphoid	3_proB_G2MS	NA
CHCHD2	0	1	0	NA	up	0.000101681	-0.0583454	0.0759777	0.0176322	0	1.06508	2.82467	3.88974	2_earlyLymphoid	3_proB_G2MS	NA
PFDN5	0	1	0	NA	down	4.06836e-07	0.0986195	0.052514	0.151134	0	-1.0082	3.29009	2.2819	2_earlyLymphoid	3_proB_G2MS	NA
RPL22	0	1	0	NA	down	0.910486	0.000142127	0.00111732	0.00125945	4.09536e-09	-1.01198	8.76734	7.75536	2_earlyLymphoid	3_proB_G2MS	NA
RPL36A	0	1	0	NA	down	0.501836	0.0131827	0.0145251	0.0277078	1.73471e-14	-1.07994	5.36621	4.28627	2_earlyLymphoid	3_proB_G2MS	NA
RPL27	0	1	0	NA	down	0.258812	0.00503778	0	0.00503778	4.74373e-09	-1.10504	8.34302	7.23797	2_earlyLymphoid	3_proB_G2MS	NA
NACA	0	1	0	NA	down	0.366905	0.00251889	0	0.00251889	1.66055e-08	-1.1272	8.32291	7.19571	2_earlyLymphoid	3_proB_G2MS	NA
NPM1	0	1	0	NA	down	0.12117	0.00881612	0	0.00881612	0.000220995	-1.17201	9.38547	8.21347	2_earlyLymphoid	3_proB_G2MS	NA
RPS11	0	1	0	NA	down	0.648518	0.00125945	0	0.00125945	4.74682e-07	-1.19335	9.43799	8.24464	2_earlyLymphoid	3_proB_G2MS	NA
MT-ND5	0	1	0	NA	down	0.000689294	0.0658739	0.052514	0.118388	0	-1.23672	4.31958	3.08286	2_earlyLymphoid	3_proB_G2MS	NA
MT-CYB	0	1	0	NA	down	0.260917	-0.00739485	0.0111732	0.00377834	6.02592e-07	-1.27856	8.71977	7.44121	2_earlyLymphoid	3_proB_G2MS	NA
BTF3	0	1	0	NA	down	0.933075	0.000142127	0.00111732	0.00125945	0	-1.30999	6.77405	5.46406	2_earlyLymphoid	3_proB_G2MS	NA
RPL23	0	1	0	NA	down	0.358784	0.0100756	0	0.0100756	2.0134e-14	-1.45172	8.19218	6.74046	2_earlyLymphoid	3_proB_G2MS	NA
TPT1	0	1	0	NA	down	NA	0	0	0	5.84975e-05	-1.45983	13.7911	12.3312	2_earlyLymphoid	3_proB_G2MS	NA
MT-ATP6	0	1	0	NA	down	0.242195	0.00812518	0.00446927	0.0125945	9.19734e-11	-1.50489	8.07632	6.57143	2_earlyLymphoid	3_proB_G2MS	NA
CD99	0	1	0	NA	down	0.0075366	0.0336293	0.165363	0.198992	0	-1.5233	3.8755	2.3522	2_earlyLymphoid	3_proB_G2MS	NA
FTH1	0	1	0	NA	down	0.434142	-0.0200766	0.109497	0.0894207	2.94871e-06	-1.63662	7.17189	5.53527	2_earlyLymphoid	3_proB_G2MS	NA
EIF3E	0	1	0	NA	down	4.58849e-06	0.0681916	0.0212291	0.0894207	0	-1.64654	4.65068	3.00415	2_earlyLymphoid	3_proB_G2MS	NA
RPS21	0	1	0	NA	down	0.446294	0.00503778	0	0.00503778	0	-1.67429	9.35531	7.68101	2_earlyLymphoid	3_proB_G2MS	NA
RPL4	0	1	0	NA	down	0.0993556	0.0076988	0.00111732	0.00881612	0	-1.79155	7.67338	5.88183	2_earlyLymphoid	3_proB_G2MS	NA
EEF2	0	1	0	NA	down	3.02704e-05	0.0616101	0.0189944	0.0806045	0	-1.91108	5.0467	3.13562	2_earlyLymphoid	3_proB_G2MS	NA
H3F3B	0	1	0	NA	down	0.0342473	-0.0233019	0.0346369	0.011335	0.000806873	-1.92922	9.4375	7.50828	2_earlyLymphoid	3_proB_G2MS	NA
RPLP0	0	1	0	NA	down	0.679273	0.00125945	0	0.00125945	2.34121e-10	-1.93833	14.2246	12.2863	2_earlyLymphoid	3_proB_G2MS	NA
EEF1B2	0	1	0	NA	down	0.0109194	0.0274433	0.00782123	0.0352645	0	-1.98687	6.81194	4.82507	2_earlyLymphoid	3_proB_G2MS	NA
RPS5	0	1	0	NA	down	0.686444	0.00125945	0	0.00125945	2.95237e-15	-2.00319	12.3575	10.3544	2_earlyLymphoid	3_proB_G2MS	NA
MT-CO2	0	1	0	NA	down	NA	0	0	0	2.01612e-09	-2.05598	14.6391	12.5831	2_earlyLymphoid	3_proB_G2MS	NA
RPL35	0	1	0	NA	down	NA	0	0	0	0	-2.12942	12.7251	10.5957	2_earlyLymphoid	3_proB_G2MS	NA
RPL8	0	1	0	NA	down	0.704767	0.00125945	0	0.00125945	0	-2.22734	10.1933	7.96595	2_earlyLymphoid	3_proB_G2MS	NA
MT-ND2	0	1	0	NA	down	0.0956992	0.0163728	0	0.0163728	1.18339e-12	-2.25154	9.61006	7.35851	2_earlyLymphoid	3_proB_G2MS	NA
RPL24	0	1	0	NA	down	0.586282	0.00251889	0	0.00251889	0	-2.31821	8.80559	6.48737	2_earlyLymphoid	3_proB_G2MS	NA
RPL28	0	1	0	NA	down	NA	0	0	0	9.25323e-14	-2.42046	22.1006	19.6801	2_earlyLymphoid	3_proB_G2MS	NA
RPL18	0	1	0	NA	down	NA	0	0	0	0	-2.54285	12.0592	9.51637	2_earlyLymphoid	3_proB_G2MS	NA
RPL38	0	1	0	NA	down	0.709297	0.00643936	0.00111732	0.00755668	0	-2.70461	7.93177	5.22716	2_earlyLymphoid	3_proB_G2MS	NA
RPL14	0	1	0	NA	down	0.82338	0.00125945	0	0.00125945	0	-2.8063	13.6726	10.8663	2_earlyLymphoid	3_proB_G2MS	NA
RPS7	0	1	0	NA	down	NA	0	0	0	0	-2.83772	14.4737	11.636	2_earlyLymphoid	3_proB_G2MS	NA
RPS20	0	1	0	NA	down	0.700706	0.00125945	0	0.00125945	0	-2.84078	12.581	9.74023	2_earlyLymphoid	3_proB_G2MS	NA
ACTG1	0	1	0	NA	down	0.696359	-0.00544446	0.00670391	0.00125945	1.32159e-10	-2.88256	13.8346	10.9521	2_earlyLymphoid	3_proB_G2MS	NA
RPS25	0	1	0	NA	down	NA	0	0	0	0	-3.02527	13.6034	10.5781	2_earlyLymphoid	3_proB_G2MS	NA
RPL15	0	1	0	NA	down	NA	0	0	0	0	-3.03424	20.5922	17.5579	2_earlyLymphoid	3_proB_G2MS	NA
RPL21	0	1	0	NA	down	NA	0	0	0	0	-3.06799	25.7229	22.6549	2_earlyLymphoid	3_proB_G2MS	NA
RPL7A	0	1	0	NA	down	NA	0	0	0	0	-3.10171	13.0123	9.91058	2_earlyLymphoid	3_proB_G2MS	NA
RPL29	0	1	0	NA	down	NA	0	0	0	0	-3.28953	13.0011	9.71159	2_earlyLymphoid	3_proB_G2MS	NA
MT-ND3	0	1	0	NA	down	0.00870373	0.0455019	0.0111732	0.0566751	0	-3.38696	8.43503	5.04806	2_earlyLymphoid	3_proB_G2MS	NA
RPS29	0	1	0	NA	down	NA	0	0	0	0	-3.55707	18.5117	14.9547	2_earlyLymphoid	3_proB_G2MS	NA
MT-CO3	0	1	0	NA	down	NA	0	0	0	0	-3.66058	17.6089	13.9484	2_earlyLymphoid	3_proB_G2MS	NA
RPL6	0	1	0	NA	down	0.561399	0.00251889	0	0.00251889	0	-3.6759	13.3173	9.64141	2_earlyLymphoid	3_proB_G2MS	NA
GNB2L1	0	1	0	NA	down	0.679273	0.00125945	0	0.00125945	0	-3.75895	11.7564	7.99748	2_earlyLymphoid	3_proB_G2MS	NA
RPL19	0	1	0	NA	down	NA	0	0	0	0	-3.84182	22.1095	18.2677	2_earlyLymphoid	3_proB_G2MS	NA
RPS28	0	1	0	NA	down	NA	0	0	0	0	-3.84585	19.1128	15.267	2_earlyLymphoid	3_proB_G2MS	NA
RPL41	0	1	0	NA	down	NA	0	0	0	2.95237e-15	-3.86486	34.6961	30.8312	2_earlyLymphoid	3_proB_G2MS	NA
RPL30	0	1	0	NA	down	NA	0	0	0	0	-3.8667	12.9687	9.10202	2_earlyLymphoid	3_proB_G2MS	NA
RPL18A	0	1	0	NA	down	NA	0	0	0	0	-4.15383	23.1966	19.0428	2_earlyLymphoid	3_proB_G2MS	NA
RPL5	0	1	0	NA	down	0.585682	0.00377834	0	0.00377834	0	-4.23173	12.6413	8.40961	2_earlyLymphoid	3_proB_G2MS	NA
RPS15A	0	1	0	NA	down	NA	0	0	0	0	-4.28507	24.7788	20.4937	2_earlyLymphoid	3_proB_G2MS	NA
RPS9	0	1	0	NA	down	0.599826	0.00125945	0	0.00125945	0	-4.43873	14.9028	10.4641	2_earlyLymphoid	3_proB_G2MS	NA
MT-ND4	0	1	0	NA	down	0.301124	0.00377834	0	0.00377834	0	-4.47309	14.0268	9.55373	2_earlyLymphoid	3_proB_G2MS	NA
RPL9	0	1	0	NA	down	0.760753	0.00125945	0	0.00125945	0	-4.47576	13.3698	8.89407	2_earlyLymphoid	3_proB_G2MS	NA
RPS27A	0	1	0	NA	down	NA	0	0	0	0	-4.8316	22.0268	17.1952	2_earlyLymphoid	3_proB_G2MS	NA
RPL35A	0	1	0	NA	down	NA	0	0	0	0	-4.90801	16.1687	11.2607	2_earlyLymphoid	3_proB_G2MS	NA
RPS8	0	1	0	NA	down	NA	0	0	0	0	-5.14908	25.9765	20.8275	2_earlyLymphoid	3_proB_G2MS	NA
RPL37A	0	1	0	NA	down	0.598463	0.00251889	0	0.00251889	0	-5.16448	16.7061	11.5417	2_earlyLymphoid	3_proB_G2MS	NA
RPL10A	0	1	0	NA	down	0.648678	0.00251889	0	0.00251889	0	-5.30547	15.0201	9.71465	2_earlyLymphoid	3_proB_G2MS	NA
RPL27A	0	1	0	NA	down	NA	0	0	0	0	-5.39628	18.657	13.2607	2_earlyLymphoid	3_proB_G2MS	NA
RPL36	0	1	0	NA	down	0.208257	0.00881612	0	0.00881612	0	-5.47238	12.2615	6.78907	2_earlyLymphoid	3_proB_G2MS	NA
RPL31	0	1	0	NA	down	0.992547	0.00125945	0	0.00125945	0	-5.59133	16.2458	10.6545	2_earlyLymphoid	3_proB_G2MS	NA
RPS15	0	1	0	NA	down	NA	0	0	0	0	-5.63126	20.5721	14.9408	2_earlyLymphoid	3_proB_G2MS	NA
RPL11	0	1	0	NA	down	NA	0	0	0	0	-5.72104	21.1732	15.4521	2_earlyLymphoid	3_proB_G2MS	NA
RPS19	0	1	0	NA	down	NA	0	0	0	0	-5.92978	28.057	22.1272	2_earlyLymphoid	3_proB_G2MS	NA
RPL37	0	1	0	NA	down	NA	0	0	0	0	-6.18211	17.6872	11.505	2_earlyLymphoid	3_proB_G2MS	NA
RPL7	0	1	0	NA	down	NA	0	0	0	0	-6.24267	20.9933	14.7506	2_earlyLymphoid	3_proB_G2MS	NA
RPS3A	0	1	0	NA	down	NA	0	0	0	0	-6.58489	27.3821	20.7972	2_earlyLymphoid	3_proB_G2MS	NA
RPS23	0	1	0	NA	down	NA	0	0	0	0	-6.68385	25.8022	19.1184	2_earlyLymphoid	3_proB_G2MS	NA
RPS14	0	1	0	NA	down	NA	0	0	0	0	-7.49276	22.552	15.0592	2_earlyLymphoid	3_proB_G2MS	NA
RPS3	0	1	0	NA	down	NA	0	0	0	0	-7.58793	23.8335	16.2456	2_earlyLymphoid	3_proB_G2MS	NA
RPL26	0	1	0	NA	down	NA	0	0	0	0	-7.66486	23.2782	15.6134	2_earlyLymphoid	3_proB_G2MS	NA
RPL32	0	1	0	NA	down	NA	0	0	0	0	-7.8707	27.6402	19.7695	2_earlyLymphoid	3_proB_G2MS	NA
EEF1A1	0	1	0	NA	down	NA	0	0	0	0	-7.9947	43.3486	35.3539	2_earlyLymphoid	3_proB_G2MS	NA
RPS12	0	1	0	NA	down	NA	0	0	0	0	-8.09921	34.6458	26.5466	2_earlyLymphoid	3_proB_G2MS	NA
RPLP1	0	1	0	NA	down	NA	0	0	0	0	-8.30664	44.6983	36.3917	2_earlyLymphoid	3_proB_G2MS	NA
RPL13A	0	1	0	NA	down	NA	0	0	0	0	-8.34633	35.0793	26.733	2_earlyLymphoid	3_proB_G2MS	NA
RPL12	0	1	0	NA	down	0.22321	0.00755668	0	0.00755668	0	-8.42065	17.3788	8.95812	2_earlyLymphoid	3_proB_G2MS	NA
RPL3	0	1	0	NA	down	NA	0	0	0	0	-8.65504	24.7911	16.136	2_earlyLymphoid	3_proB_G2MS	NA
RPS6	0	1	0	NA	down	NA	0	0	0	0	-8.71833	33.2737	24.5554	2_earlyLymphoid	3_proB_G2MS	NA
RPL10	0	1	0	NA	down	NA	0	0	0	0	-8.87705	45.8279	36.9509	2_earlyLymphoid	3_proB_G2MS	NA
MT-CO1	0	1	0	NA	down	0.636279	0.00125945	0	0.00125945	0	-8.95556	23.0514	14.0958	2_earlyLymphoid	3_proB_G2MS	NA
RPS24	0	1	0	NA	down	NA	0	0	0	0	-9.37266	25.0704	15.6977	2_earlyLymphoid	3_proB_G2MS	NA
RPL39	0	1	0	NA	down	NA	0	0	0	0	-9.56144	32.8536	23.2922	2_earlyLymphoid	3_proB_G2MS	NA
RPS4X	0	1	0	NA	down	NA	0	0	0	0	-9.83312	27.5397	17.7065	2_earlyLymphoid	3_proB_G2MS	NA
RPS2	0	1	0	NA	down	NA	0	0	0	0	-9.98711	33.1508	23.1637	2_earlyLymphoid	3_proB_G2MS	NA
RPL13	0	1	0	NA	down	NA	0	0	0	0	-11.275	30.5709	19.296	2_earlyLymphoid	3_proB_G2MS	NA
RPS27	0	1	0	NA	down	NA	0	0	0	0	-11.3993	32.0983	20.699	2_earlyLymphoid	3_proB_G2MS	NA
RPL34	0	1	0	NA	down	NA	0	0	0	0	-12.658	29.8771	17.2191	2_earlyLymphoid	3_proB_G2MS	NA
RPS18	0	1	0	NA	down	NA	0	0	0	0	-12.9564	39.5307	26.5743	2_earlyLymphoid	3_proB_G2MS	NA
MALAT1	0	1	0	NA	down	NA	0	0	0	0	-47.4424	180.888	133.446	2_earlyLymphoid	3_proB_G2MS	NA

## Sheet: TBL_preBG2MS.vs.proBG2MS
gene	DZ	DE	DM	sign_by_DZ	sign_by_DE	zero.pvalue.adj	zero_proportion_difference	c1.zero_proportion	c2.zero_proportion	nonzero.pvalue.adj	relative_difference	c1.maxmean	c2.maxmean	c1.celltype	c2.celltype	DM_nro_clusters_direction
DUT	1	0	1	down	NA	9.49117e-11	0.115196	0.159277	0.0440806	2.14884e-07	0.863324	6.80535	5.94203	5_preB_G2MS	3_proB_G2MS	up
DNTT	1	1	0	down	down	5.88998e-38	0.870784	0.874562	0.00377834	0	-13.3883	1.45116	14.8394	5_preB_G2MS	3_proB_G2MS	NA
SOCS2	1	0	0	down	NA	7.97342e-127	0.779356	0.987165	0.207809	NA	-2.26232	0	2.26232	5_preB_G2MS	3_proB_G2MS	NA
LTB	1	1	0	down	down	2.19255e-155	0.633213	0.948075	0.314861	0	-4.11242	1.58427	5.69669	5_preB_G2MS	3_proB_G2MS	NA
SYNGR1	1	0	0	down	NA	1.59746e-151	0.608858	0.937573	0.328715	3.59395e-12	-0.57609	1.02804	1.60413	5_preB_G2MS	3_proB_G2MS	NA
MEF2C	1	0	0	down	NA	1.65881e-130	0.554172	0.872812	0.31864	0	-0.668165	1.11927	1.78743	5_preB_G2MS	3_proB_G2MS	NA
CYGB	1	0	0	down	NA	1.26447e-84	0.55198	0.987748	0.435768	NA	-1.65179	0	1.65179	5_preB_G2MS	3_proB_G2MS	NA
CD99	1	1	0	down	down	3.46086e-97	0.505792	0.704784	0.198992	0	-1.10121	1.25099	2.3522	5_preB_G2MS	3_proB_G2MS	NA
AIF1	1	0	0	down	NA	5.03266e-121	0.501564	0.924737	0.423174	0.0476352	-0.118395	1.50388	1.62227	5_preB_G2MS	3_proB_G2MS	NA
EGFL7	1	0	0	down	NA	1.16035e-69	0.499481	0.990665	0.491184	NA	-1.42574	0	1.42574	5_preB_G2MS	3_proB_G2MS	NA
LST1	1	0	0	down	NA	9.65847e-96	0.493434	0.97958	0.486146	NA	-0.623529	1.2	1.82353	5_preB_G2MS	3_proB_G2MS	NA
FHIT	1	0	0	down	NA	8.22148e-107	0.480579	0.935239	0.45466	7.13962e-08	-0.604145	1.05405	1.6582	5_preB_G2MS	3_proB_G2MS	NA
LCN6-1	1	0	0	down	NA	1.9161e-75	0.476506	0.986581	0.510076	NA	-1.39589	0	1.39589	5_preB_G2MS	3_proB_G2MS	NA
ADA	1	0	0	down	NA	7.16629e-77	0.45108	0.711785	0.260705	0	-0.533837	1.2004	1.73424	5_preB_G2MS	3_proB_G2MS	NA
GYPC	1	0	0	down	NA	1.03871e-75	0.440411	0.655776	0.215365	0	-0.77314	1.25254	2.02568	5_preB_G2MS	3_proB_G2MS	NA
CKLF	1	0	0	down	NA	1.89073e-79	0.434672	0.807468	0.372796	1.33628e-07	-0.296495	1.11515	1.41165	5_preB_G2MS	3_proB_G2MS	NA
XBP1	1	0	0	down	NA	7.59422e-71	0.423604	0.748541	0.324937	0	-0.873797	1.3109	2.1847	5_preB_G2MS	3_proB_G2MS	NA
IFITM3	1	0	0	down	NA	3.26755e-61	0.404532	0.988915	0.584383	NA	-1.22121	0	1.22121	5_preB_G2MS	3_proB_G2MS	NA
BCL11A	1	0	0	down	NA	4.17141e-82	0.403872	0.86231	0.458438	0.00229085	-0.271502	1.27966	1.55116	5_preB_G2MS	3_proB_G2MS	NA
C5orf56	1	0	0	down	NA	4.44051e-80	0.386668	0.952159	0.565491	1	-0.15122	1.04878	1.2	5_preB_G2MS	3_proB_G2MS	NA
TKT	1	0	0	down	NA	2.17519e-56	0.385317	0.532672	0.147355	0	-0.950957	1.33708	2.28804	5_preB_G2MS	3_proB_G2MS	NA
PAG1	1	0	0	down	NA	2.57961e-55	0.377588	0.749125	0.371537	2.51341e-10	-0.42285	1.18837	1.61122	5_preB_G2MS	3_proB_G2MS	NA
SVIP	1	0	0	down	NA	2.64307e-54	0.356567	0.775963	0.419395	1.39564e-05	-0.312715	1.19271	1.50542	5_preB_G2MS	3_proB_G2MS	NA
LINC01013	1	0	0	down	NA	1.09429e-36	0.355534	0.995333	0.639798	NA	-1.3986	0	1.3986	5_preB_G2MS	3_proB_G2MS	NA
KIAA0125	1	0	0	down	NA	6.52156e-61	0.354179	0.837806	0.483627	1	-0.0188279	1.38849	1.40732	5_preB_G2MS	3_proB_G2MS	NA
NPY	1	0	0	down	NA	7.50944e-18	0.350219	0.998833	0.648615	NA	-1.64158	0	1.64158	5_preB_G2MS	3_proB_G2MS	NA
PLAC8	1	0	0	down	NA	1.60541e-55	0.350076	0.802217	0.452141	6.79961e-07	-0.332174	1.24484	1.57701	5_preB_G2MS	3_proB_G2MS	NA
ABRACL	1	0	0	down	NA	4.22795e-52	0.348324	0.72112	0.372796	0.00644262	-0.169212	1.28661	1.45582	5_preB_G2MS	3_proB_G2MS	NA
VAMP5	1	0	0	down	NA	7.84448e-68	0.348217	0.928821	0.580605	0.627975	-0.194063	1.04918	1.24324	5_preB_G2MS	3_proB_G2MS	NA
KLF10	1	0	0	down	NA	2.35816e-69	0.339244	0.93874	0.599496	0.0140609	-0.367296	1.06667	1.43396	5_preB_G2MS	3_proB_G2MS	NA
TXN	1	0	0	down	NA	1.52982e-48	0.334403	0.571179	0.236776	8.78987e-14	-0.418906	1.61905	2.03795	5_preB_G2MS	3_proB_G2MS	NA
ERG	1	0	0	down	NA	3.15851e-30	0.327734	0.996499	0.668766	NA	-1.12167	0	1.12167	5_preB_G2MS	3_proB_G2MS	NA
HPS4	1	0	0	down	NA	2.90309e-44	0.320831	0.805718	0.484887	1.81252e-08	-0.443211	1.14114	1.58435	5_preB_G2MS	3_proB_G2MS	NA
GLRX	1	0	0	down	NA	8.39243e-38	0.32053	0.539673	0.219144	0	-0.563555	1.33967	1.90323	5_preB_G2MS	3_proB_G2MS	NA
MDK	1	0	0	down	NA	2.19036e-64	0.316907	0.950408	0.633501	0.13731	-0.305033	1.11765	1.42268	5_preB_G2MS	3_proB_G2MS	NA
SCCPDH	1	0	0	down	NA	5.50099e-44	0.314848	0.785881	0.471033	1	-0.0790775	1.12807	1.20714	5_preB_G2MS	3_proB_G2MS	NA
FAM26F	1	0	0	down	NA	2.95535e-44	0.311737	0.809218	0.497481	6.12142e-09	-0.370352	1.15596	1.52632	5_preB_G2MS	3_proB_G2MS	NA
PSME2	1	0	0	down	NA	4.76697e-40	0.31124	0.490082	0.178841	0	-0.679599	1.59954	2.27914	5_preB_G2MS	3_proB_G2MS	NA
SOD1	1	0	0	down	NA	1.274e-41	0.308166	0.497083	0.188917	0	-0.475314	1.44084	1.91615	5_preB_G2MS	3_proB_G2MS	NA
GPX1	1	0	0	down	NA	5.40195e-43	0.306372	0.614936	0.308564	3.91945e-09	-0.486132	1.38636	1.8725	5_preB_G2MS	3_proB_G2MS	NA
ATP1B3	1	0	0	down	NA	1.65759e-33	0.30211	0.509918	0.207809	9.67273e-12	-0.427884	1.38929	1.81717	5_preB_G2MS	3_proB_G2MS	NA
TMED2	1	0	0	down	NA	4.19941e-32	0.300528	0.633022	0.332494	1.47735e-08	-0.297795	1.20032	1.49811	5_preB_G2MS	3_proB_G2MS	NA
APRT	1	0	0	down	NA	3.37581e-40	0.298788	0.686698	0.387909	0.0742057	-0.163138	1.33892	1.50206	5_preB_G2MS	3_proB_G2MS	NA
AP3S1	1	0	0	down	NA	4.21674e-35	0.296863	0.742707	0.445844	0.000363465	-0.21391	1.12018	1.33409	5_preB_G2MS	3_proB_G2MS	NA
GBP4	1	0	0	down	NA	1.37465e-56	0.296349	0.971412	0.675063	1	-0.084243	1.02041	1.10465	5_preB_G2MS	3_proB_G2MS	NA
KLF6	1	0	0	down	NA	2.30861e-43	0.29604	0.808635	0.512594	0.000890742	-0.33249	1.34451	1.677	5_preB_G2MS	3_proB_G2MS	NA
C1orf228	1	0	0	down	NA	7.94196e-53	0.293421	0.913069	0.619647	1	-0.0380461	1.12752	1.16556	5_preB_G2MS	3_proB_G2MS	NA
KDELR2	1	0	0	down	NA	1.5015e-35	0.290557	0.766628	0.476071	0.00276585	-0.186827	1.08	1.26683	5_preB_G2MS	3_proB_G2MS	NA
AC002454.1	1	0	0	down	NA	7.16668e-60	0.287449	0.948658	0.661209	1	-0.267996	1.18182	1.44981	5_preB_G2MS	3_proB_G2MS	NA
RASGRP2	1	0	0	down	NA	5.64711e-33	0.286454	0.731039	0.444584	9.63952e-05	-0.233053	1.13883	1.37188	5_preB_G2MS	3_proB_G2MS	NA
TSC22D4	1	0	0	down	NA	1.97602e-33	0.280417	0.775379	0.494962	0.11189	-0.133219	1.0987	1.23192	5_preB_G2MS	3_proB_G2MS	NA
SOD2	1	0	0	down	NA	2.98451e-32	0.27885	0.691949	0.413098	1.0316e-10	-0.592462	1.25947	1.85193	5_preB_G2MS	3_proB_G2MS	NA
DARS	1	0	0	down	NA	4.44419e-33	0.275971	0.752042	0.476071	1	-0.0972624	1.16235	1.25962	5_preB_G2MS	3_proB_G2MS	NA
COMT	1	0	0	down	NA	3.9444e-40	0.275288	0.855893	0.580605	1	-0.104303	1.07287	1.17718	5_preB_G2MS	3_proB_G2MS	NA
TCF4	1	0	0	down	NA	3.00957e-27	0.271921	0.572929	0.301008	3.41742e-05	-0.332706	1.43306	1.76577	5_preB_G2MS	3_proB_G2MS	NA
IER2	1	0	0	down	NA	2.42136e-33	0.269859	0.749708	0.479849	8.22017e-09	-0.552865	1.33333	1.8862	5_preB_G2MS	3_proB_G2MS	NA
JUP	1	0	0	down	NA	9.42757e-38	0.26726	0.885648	0.618388	0.992643	-0.112497	1.04592	1.15842	5_preB_G2MS	3_proB_G2MS	NA
PDE4B	1	0	0	down	NA	1.63426e-44	0.266936	0.929405	0.662469	1	-0.0770014	1.09091	1.16791	5_preB_G2MS	3_proB_G2MS	NA
TSPAN14	1	0	0	down	NA	2.65865e-33	0.266657	0.853559	0.586902	0.390319	-0.152718	1.06375	1.21646	5_preB_G2MS	3_proB_G2MS	NA
CDK6	1	0	0	down	NA	5.73995e-35	0.264813	0.773629	0.508816	0.00437173	-0.219535	1.19072	1.41026	5_preB_G2MS	3_proB_G2MS	NA
SIAH2	1	0	0	down	NA	6.70186e-34	0.263971	0.808051	0.544081	0.186003	-0.165444	1.09422	1.25967	5_preB_G2MS	3_proB_G2MS	NA
SNX2	1	0	0	down	NA	1.45877e-23	0.263652	0.589848	0.326196	1.35127e-07	-0.293487	1.25605	1.54953	5_preB_G2MS	3_proB_G2MS	NA
AKR1A1	1	0	0	down	NA	2.92418e-34	0.263609	0.788798	0.525189	0.379526	-0.117839	1.10497	1.22281	5_preB_G2MS	3_proB_G2MS	NA
PPP1R18	1	0	0	down	NA	3.21422e-25	0.259515	0.729288	0.469773	1.97309e-08	-0.327581	1.11422	1.44181	5_preB_G2MS	3_proB_G2MS	NA
ETS2	1	0	0	down	NA	1.89342e-35	0.257887	0.813302	0.555416	1	-0.104285	1.1875	1.29178	5_preB_G2MS	3_proB_G2MS	NA
TMEM123	1	0	0	down	NA	6.32028e-25	0.257187	0.544341	0.287154	1.28662e-09	-0.29059	1.32778	1.61837	5_preB_G2MS	3_proB_G2MS	NA
PMAIP1	1	0	0	down	NA	1.97596e-26	0.256607	0.70245	0.445844	0.0438973	-0.204991	1.43137	1.63636	5_preB_G2MS	3_proB_G2MS	NA
HSP90AB1	1	0	0	down	NA	4.15426e-36	0.252426	0.461494	0.209068	0.00016864	0.112923	3.09859	2.98567	5_preB_G2MS	3_proB_G2MS	NA
IGFBP7	1	0	0	down	NA	2.38917e-29	0.250903	0.75846	0.507557	9.1982e-06	-0.295681	1.157	1.45269	5_preB_G2MS	3_proB_G2MS	NA
NME4	1	0	0	down	NA	2.68508e-40	0.248794	0.896149	0.647355	1	-0.0922552	1.08989	1.18214	5_preB_G2MS	3_proB_G2MS	NA
EBPL	1	0	0	down	NA	1.53827e-39	0.24871	0.873396	0.624685	1	-0.111279	1.09677	1.20805	5_preB_G2MS	3_proB_G2MS	NA
FHL1	1	0	0	down	NA	6.8971e-27	0.247126	0.837806	0.59068	1	-0.0552075	1.08633	1.14154	5_preB_G2MS	3_proB_G2MS	NA
SLC44A1	1	0	0	down	NA	1.00456e-35	0.243905	0.910152	0.666247	1	-0.041779	1.07143	1.11321	5_preB_G2MS	3_proB_G2MS	NA
GSTP1	1	0	0	down	NA	8.15319e-28	0.243295	0.48133	0.238035	0.0111833	-0.10216	2.06974	2.1719	5_preB_G2MS	3_proB_G2MS	NA
GNG11	1	0	0	down	NA	5.91999e-28	0.240924	0.995333	0.754408	NA	-1.22051	0	1.22051	5_preB_G2MS	3_proB_G2MS	NA
PLSCR1	1	0	0	down	NA	5.71994e-32	0.240497	0.905484	0.664987	1	-0.104753	1.04938	1.15414	5_preB_G2MS	3_proB_G2MS	NA
KLF3	1	0	0	down	NA	2.38879e-42	0.237414	0.936406	0.698992	1	-0.129861	1.04587	1.17573	5_preB_G2MS	3_proB_G2MS	NA
NEAT1	1	0	0	down	NA	4.00514e-31	0.235559	0.80105	0.565491	0.039933	-0.250856	1.36364	1.61449	5_preB_G2MS	3_proB_G2MS	NA
MT1X	1	0	0	down	NA	6.84661e-36	0.234264	0.896733	0.662469	2.06308e-08	-0.659499	1.10169	1.76119	5_preB_G2MS	3_proB_G2MS	NA
VPS26B	1	0	0	down	NA	8.47967e-36	0.232746	0.931739	0.698992	1	-0.0362264	1.06838	1.1046	5_preB_G2MS	3_proB_G2MS	NA
NIPSNAP3A	1	0	0	down	NA	8.18035e-28	0.228189	0.878063	0.649874	1	-0.0348869	1.04785	1.08273	5_preB_G2MS	3_proB_G2MS	NA
PSMA6	1	0	0	down	NA	1.10957e-25	0.227957	0.841307	0.61335	0.87655	-0.119491	1.06618	1.18567	5_preB_G2MS	3_proB_G2MS	NA
ELK3	1	0	0	down	NA	2.91961e-32	0.227932	0.992415	0.764484	NA	-1.17112	0	1.17112	5_preB_G2MS	3_proB_G2MS	NA
HHEX	1	0	0	down	NA	5.74937e-35	0.225782	0.908401	0.68262	0.132337	-0.210949	1.05096	1.2619	5_preB_G2MS	3_proB_G2MS	NA
GSTO1	1	0	0	down	NA	8.9048e-19	0.224887	0.586348	0.361461	0.000219349	-0.182912	1.21157	1.39448	5_preB_G2MS	3_proB_G2MS	NA
NME1	1	0	0	down	NA	1.34817e-24	0.224563	0.630105	0.405542	1	0.114794	1.73344	1.61864	5_preB_G2MS	3_proB_G2MS	NA
NRIP1	1	0	0	down	NA	8.79814e-31	0.224466	0.893232	0.668766	1	-0.120738	1.06557	1.18631	5_preB_G2MS	3_proB_G2MS	NA
AKAP12	1	0	0	down	NA	3.6598e-17	0.224092	0.65986	0.435768	1.19084e-07	-0.595527	1.39108	1.98661	5_preB_G2MS	3_proB_G2MS	NA
SEC63	1	0	0	down	NA	1.12829e-21	0.221658	0.76196	0.540302	0.349358	-0.141042	1.12745	1.26849	5_preB_G2MS	3_proB_G2MS	NA
TLE4	1	0	0	down	NA	3.88393e-19	0.221388	0.662194	0.440806	0.00762501	-0.206775	1.25043	1.45721	5_preB_G2MS	3_proB_G2MS	NA
PSMG1	1	0	0	down	NA	5.3845e-22	0.221279	0.790548	0.56927	1	-0.0886559	1.13649	1.22515	5_preB_G2MS	3_proB_G2MS	NA
TOP2B	1	0	0	down	NA	2.7731e-16	0.220969	0.548425	0.327456	3.90788e-13	-0.478704	1.29845	1.77715	5_preB_G2MS	3_proB_G2MS	NA
PAICS	1	0	0	down	NA	1.27027e-21	0.218397	0.691949	0.473552	1	-0.064693	1.41856	1.48325	5_preB_G2MS	3_proB_G2MS	NA
MTF2	1	0	0	down	NA	1.2423e-17	0.21737	0.728705	0.511335	0.125037	-0.158281	1.17419	1.33247	5_preB_G2MS	3_proB_G2MS	NA
TPM3	1	0	0	down	NA	9.57208e-19	0.215874	0.453909	0.238035	6.58958e-09	-0.315263	1.40705	1.72231	5_preB_G2MS	3_proB_G2MS	NA
MYCBP2	1	0	0	down	NA	6.4561e-19	0.214982	0.790548	0.575567	1	-0.0572973	1.15042	1.20772	5_preB_G2MS	3_proB_G2MS	NA
EBF1	1	0	0	down	NA	5.49741e-15	0.21319	0.567095	0.353904	0.000178884	-0.268733	1.3531	1.62183	5_preB_G2MS	3_proB_G2MS	NA
HSPD1	1	0	0	down	NA	6.12126e-19	0.212577	0.47958	0.267003	0.813619	0.108521	2.27691	2.16838	5_preB_G2MS	3_proB_G2MS	NA
PCMT1	1	0	0	down	NA	1.7514e-14	0.211979	0.685531	0.473552	0.0704666	-0.142369	1.14471	1.28708	5_preB_G2MS	3_proB_G2MS	NA
ACTN1	1	0	0	down	NA	1.00636e-33	0.211837	0.988915	0.777078	NA	-1.06215	0	1.06215	5_preB_G2MS	3_proB_G2MS	NA
PTGES3	1	0	0	down	NA	1.44696e-22	0.211184	0.259043	0.0478589	0	-0.92032	1.9937	2.91402	5_preB_G2MS	3_proB_G2MS	NA
SPRY1	1	0	0	down	NA	2.8598e-39	0.206956	0.978996	0.77204	NA	-0.182167	1.02778	1.20994	5_preB_G2MS	3_proB_G2MS	NA
PRMT1	1	0	0	down	NA	1.80564e-20	0.206627	0.705368	0.498741	1	-0.00686104	1.22178	1.22864	5_preB_G2MS	3_proB_G2MS	NA
STAG3	1	0	0	down	NA	8.27926e-36	0.20641	0.962077	0.755668	1	-0.216733	1.04615	1.26289	5_preB_G2MS	3_proB_G2MS	NA
IMPDH2	1	0	0	down	NA	7.00748e-18	0.205838	0.596266	0.390428	2.32839e-06	-0.275092	1.36127	1.63636	5_preB_G2MS	3_proB_G2MS	NA
TMEM106C	1	0	0	down	NA	1.07039e-12	0.204996	0.630688	0.425693	1	-0.0929263	1.2733	1.36623	5_preB_G2MS	3_proB_G2MS	NA
C1QBP	1	0	0	down	NA	2.08846e-18	0.203141	0.495333	0.292191	0.485773	-0.0536091	1.71329	1.7669	5_preB_G2MS	3_proB_G2MS	NA
RPS4Y1	1	0	0	down	NA	2.12265e-21	0.200043	0.732789	0.532746	1	-0.0120058	2.29258	2.30458	5_preB_G2MS	3_proB_G2MS	NA
WBP5	1	0	0	down	NA	9.66244e-22	0.198787	0.891482	0.692695	1	0.00326106	1.13441	1.13115	5_preB_G2MS	3_proB_G2MS	NA
EIF4A1	1	0	0	down	NA	5.57205e-23	0.197349	0.290548	0.093199	7.92761e-13	-0.514218	2.52467	3.03889	5_preB_G2MS	3_proB_G2MS	NA
LINC00426	1	0	0	down	NA	5.35266e-31	0.196676	0.949825	0.753149	1	-0.0220693	1.06977	1.09184	5_preB_G2MS	3_proB_G2MS	NA
B3GNT2	1	0	0	down	NA	1.00776e-28	0.196593	0.927071	0.730479	1	-0.13757	1.04	1.17757	5_preB_G2MS	3_proB_G2MS	NA
CTGF	1	0	0	down	NA	3.91786e-36	0.19651	0.983664	0.787154	NA	-1.49112	0	1.49112	5_preB_G2MS	3_proB_G2MS	NA
CD34	1	0	0	down	NA	1.68437e-30	0.195862	0.991832	0.79597	NA	-1.15432	0	1.15432	5_preB_G2MS	3_proB_G2MS	NA
KRTCAP2	1	0	0	down	NA	4.15535e-17	0.195321	0.792299	0.596977	1	-0.0582514	1.10112	1.15938	5_preB_G2MS	3_proB_G2MS	NA
MGMT	1	0	0	down	NA	6.5289e-14	0.195274	0.753209	0.557935	1	-0.0399467	1.1253	1.16524	5_preB_G2MS	3_proB_G2MS	NA
NR3C1	1	0	0	down	NA	1.1403e-14	0.194562	0.770128	0.575567	0.753671	-0.145702	1.14213	1.28783	5_preB_G2MS	3_proB_G2MS	NA
SERPINB6	1	0	0	down	NA	2.37429e-34	0.194278	0.956243	0.761965	1	-0.0524868	1.05333	1.10582	5_preB_G2MS	3_proB_G2MS	NA
FKBP4	1	0	0	down	NA	5.11457e-27	0.194083	0.903151	0.709068	1	0.0248787	1.18072	1.15584	5_preB_G2MS	3_proB_G2MS	NA
ZNF22	1	0	0	down	NA	3.21815e-12	0.193706	0.590432	0.396725	0.0418234	-0.182125	1.2208	1.40292	5_preB_G2MS	3_proB_G2MS	NA
UBE2L6	1	0	0	down	NA	4.10265e-17	0.193636	0.781797	0.588161	1	-0.063149	1.09893	1.16208	5_preB_G2MS	3_proB_G2MS	NA
NENF	1	0	0	down	NA	1.43582e-15	0.192338	0.718786	0.526448	0.168523	-0.122219	1.14108	1.2633	5_preB_G2MS	3_proB_G2MS	NA
POLD2	1	0	0	down	NA	2.55955e-16	0.191866	0.748541	0.556675	1	-0.0648136	1.13689	1.2017	5_preB_G2MS	3_proB_G2MS	NA
TTC3	1	0	0	down	NA	8.05987e-15	0.18994	0.725204	0.535264	0.355127	-0.121071	1.16348	1.28455	5_preB_G2MS	3_proB_G2MS	NA
RTN3	1	0	0	down	NA	4.58133e-11	0.189308	0.606184	0.416877	0.000730101	-0.189447	1.20148	1.39093	5_preB_G2MS	3_proB_G2MS	NA
LRRFIP1	1	0	0	down	NA	2.12615e-12	0.188732	0.502334	0.313602	6.38199e-09	-0.360476	1.45604	1.81651	5_preB_G2MS	3_proB_G2MS	NA
EIF1AY	1	0	0	down	NA	5.97065e-25	0.188007	0.884481	0.696474	1	-0.145082	1.18687	1.33195	5_preB_G2MS	3_proB_G2MS	NA
FERMT3	1	0	0	down	NA	6.81846e-15	0.187969	0.82147	0.633501	1	-0.0896166	1.0719	1.16151	5_preB_G2MS	3_proB_G2MS	NA
TECR	1	0	0	down	NA	4.52413e-13	0.187559	0.683781	0.496222	1	-0.0778137	1.13469	1.2125	5_preB_G2MS	3_proB_G2MS	NA
LGALS3BP	1	0	0	down	NA	4.42678e-32	0.187518	0.962077	0.774559	1	-0.05578	1.06154	1.11732	5_preB_G2MS	3_proB_G2MS	NA
AGPS	1	0	0	down	NA	1.75276e-22	0.187331	0.885064	0.697733	1	-0.121891	1.04061	1.1625	5_preB_G2MS	3_proB_G2MS	NA
RABAC1	1	0	0	down	NA	3.41847e-15	0.186837	0.724621	0.537783	1	-0.0139819	1.1822	1.19619	5_preB_G2MS	3_proB_G2MS	NA
LY6E	1	0	0	down	NA	1.93057e-32	0.18673	0.932322	0.745592	1	-0.157818	1.12931	1.28713	5_preB_G2MS	3_proB_G2MS	NA
SEPT9	1	0	0	down	NA	2.76955e-12	0.186333	0.508751	0.322418	6.0001e-06	-0.233035	1.28741	1.52045	5_preB_G2MS	3_proB_G2MS	NA
MIF	1	0	0	down	NA	2.41878e-16	0.185842	0.507001	0.321159	1	0.0687137	1.9574	1.88868	5_preB_G2MS	3_proB_G2MS	NA
TP53INP1	1	0	0	down	NA	2.37559e-28	0.185591	0.93874	0.753149	1	-0.120068	1.0381	1.15816	5_preB_G2MS	3_proB_G2MS	NA
CMPK2	1	0	0	down	NA	1.71267e-27	0.184147	0.941074	0.756927	1	-0.0781819	1.0099	1.08808	5_preB_G2MS	3_proB_G2MS	NA
SSR4	1	0	0	down	NA	5.577e-17	0.184095	0.663944	0.479849	0.0263845	-0.158196	1.24132	1.39952	5_preB_G2MS	3_proB_G2MS	NA
FAM134B	1	0	0	down	NA	2.7847e-31	0.183795	0.977246	0.793451	NA	-0.0304878	1	1.03049	5_preB_G2MS	3_proB_G2MS	NA
COPS6	1	0	0	down	NA	3.69523e-12	0.183697	0.661027	0.47733	1	-0.123924	1.16523	1.28916	5_preB_G2MS	3_proB_G2MS	NA
MRPL14	1	0	0	down	NA	4.88025e-14	0.183115	0.73979	0.556675	1	-0.0683729	1.13901	1.20739	5_preB_G2MS	3_proB_G2MS	NA
RTN4	1	0	0	down	NA	9.54947e-12	0.182583	0.516336	0.333753	0.000225617	-0.240119	1.29674	1.53686	5_preB_G2MS	3_proB_G2MS	NA
LSM4	1	0	0	down	NA	3.09943e-14	0.181811	0.359393	0.177582	1.0316e-10	-0.421973	1.54281	1.96478	5_preB_G2MS	3_proB_G2MS	NA
AMD1	1	0	0	down	NA	1.08026e-16	0.181735	0.733372	0.551637	1	-0.0572063	1.14223	1.19944	5_preB_G2MS	3_proB_G2MS	NA
FXYD5	1	0	0	down	NA	1.56134e-15	0.181578	0.743291	0.561713	1	-0.119619	1.25682	1.37644	5_preB_G2MS	3_proB_G2MS	NA
ANXA7	1	0	0	down	NA	1.44337e-17	0.181534	0.862894	0.68136	1	-0.0279876	1.05106	1.07905	5_preB_G2MS	3_proB_G2MS	NA
CACYBP	1	0	0	down	NA	4.06268e-12	0.179802	0.392649	0.212846	0.00440121	-0.206441	1.43516	1.6416	5_preB_G2MS	3_proB_G2MS	NA
CRELD2	1	0	0	down	NA	5.82257e-16	0.179691	0.86231	0.68262	1	-0.067124	1.0678	1.13492	5_preB_G2MS	3_proB_G2MS	NA
ITM2B	1	0	0	down	NA	8.43041e-13	0.178359	0.474329	0.29597	0.000185882	-0.248305	1.46726	1.71556	5_preB_G2MS	3_proB_G2MS	NA
MLTK	1	0	0	down	NA	1.13008e-19	0.178201	0.904901	0.7267	1	-0.0430861	1.04908	1.09217	5_preB_G2MS	3_proB_G2MS	NA
LAT2	1	0	0	down	NA	1.43104e-11	0.177228	0.37748	0.200252	7.25278e-12	-0.626775	1.61575	2.24252	5_preB_G2MS	3_proB_G2MS	NA
IRF1	1	0	0	down	NA	3.1514e-13	0.17666	0.749708	0.573048	1	-0.0269612	1.22378	1.25074	5_preB_G2MS	3_proB_G2MS	NA
ZFP36L2	1	0	0	down	NA	4.43043e-13	0.176359	0.483664	0.307305	3.90788e-13	-0.736949	1.98305	2.72	5_preB_G2MS	3_proB_G2MS	NA
FNBP1	1	0	0	down	NA	4.36398e-16	0.175745	0.816803	0.641058	0.384327	-0.151637	1.07643	1.22807	5_preB_G2MS	3_proB_G2MS	NA
ENG	1	0	0	down	NA	1.47536e-28	0.174646	0.965578	0.790932	1	-0.0432918	1.01695	1.06024	5_preB_G2MS	3_proB_G2MS	NA
LYSMD2	1	0	0	down	NA	1.31271e-26	0.173729	0.953326	0.779597	1	-0.0560714	1.0125	1.06857	5_preB_G2MS	3_proB_G2MS	NA
CSRNP1	1	0	0	down	NA	9.37318e-17	0.173357	0.878646	0.70529	1	-0.0731838	1.07212	1.1453	5_preB_G2MS	3_proB_G2MS	NA
HN1	1	0	0	down	NA	1.53068e-08	0.172954	0.63769	0.464736	0.000946734	-0.573871	1.49436	2.06824	5_preB_G2MS	3_proB_G2MS	NA
STMN3	1	0	0	down	NA	2.35634e-23	0.172719	0.94224	0.769521	1	-0.076006	1.06061	1.13661	5_preB_G2MS	3_proB_G2MS	NA
SMARCD2	1	0	0	down	NA	4.60802e-20	0.172357	0.922987	0.75063	1	-0.0227273	1.02273	1.04545	5_preB_G2MS	3_proB_G2MS	NA
SSB	1	0	0	down	NA	2.63998e-10	0.17225	0.630688	0.458438	0.36373	-0.11766	1.25908	1.37674	5_preB_G2MS	3_proB_G2MS	NA
PRDX6	1	0	0	down	NA	2.25225e-11	0.171774	0.422404	0.25063	6.40941e-09	-0.285078	1.37879	1.66387	5_preB_G2MS	3_proB_G2MS	NA
CDCA7	1	0	0	down	NA	5.38295e-11	0.171665	0.550758	0.379093	0.952158	-0.121359	1.45065	1.57201	5_preB_G2MS	3_proB_G2MS	NA
RAB11A	1	0	0	down	NA	7.37173e-09	0.170691	0.443991	0.2733	0.00328472	-0.178029	1.36097	1.53899	5_preB_G2MS	3_proB_G2MS	NA
NAE1	1	0	0	down	NA	6.0345e-10	0.170472	0.621354	0.450882	1	-0.0724509	1.22342	1.29587	5_preB_G2MS	3_proB_G2MS	NA
RCN2	1	0	0	down	NA	1.53816e-09	0.17036	0.591015	0.420655	0.172343	-0.124809	1.19258	1.31739	5_preB_G2MS	3_proB_G2MS	NA
TUBA4A	1	0	0	down	NA	6.50153e-15	0.17005	0.848891	0.678841	0.0275026	-0.228723	1.08108	1.3098	5_preB_G2MS	3_proB_G2MS	NA
BAALC	1	0	0	down	NA	2.05759e-21	0.169043	0.996499	0.827456	NA	-1.11679	0	1.11679	5_preB_G2MS	3_proB_G2MS	NA
PPT1	1	0	0	down	NA	2.07914e-17	0.168717	0.881564	0.712846	1	-0.0373779	1.05911	1.09649	5_preB_G2MS	3_proB_G2MS	NA
HMHB1	1	0	0	down	NA	7.35232e-23	0.168663	0.945741	0.777078	1	-0.21633	1.03226	1.24859	5_preB_G2MS	3_proB_G2MS	NA
NDUFA3	1	0	0	down	NA	1.0899e-09	0.168322	0.53734	0.369018	0.00276585	-0.172726	1.27238	1.44511	5_preB_G2MS	3_proB_G2MS	NA
PIM3	1	0	0	down	NA	1.19745e-10	0.167825	0.718203	0.550378	1	-0.115455	1.18427	1.29972	5_preB_G2MS	3_proB_G2MS	NA
MT2A	1	0	0	down	NA	5.85175e-25	0.16769	0.91832	0.75063	1	-0.0178932	1.12857	1.14646	5_preB_G2MS	3_proB_G2MS	NA
TCEAL8	1	0	0	down	NA	3.639e-10	0.166955	0.745041	0.578086	1	-0.0667782	1.12128	1.18806	5_preB_G2MS	3_proB_G2MS	NA
NFE2L2	1	0	0	down	NA	6.41687e-18	0.16631	0.911902	0.745592	1	-0.0541932	1.07947	1.13366	5_preB_G2MS	3_proB_G2MS	NA
TMEM59	1	0	0	down	NA	7.30141e-09	0.166285	0.563011	0.396725	0.00307709	-0.150926	1.26035	1.41127	5_preB_G2MS	3_proB_G2MS	NA
ATG3	1	0	0	down	NA	9.8718e-10	0.166084	0.692532	0.526448	1	-0.052924	1.09867	1.1516	5_preB_G2MS	3_proB_G2MS	NA
SYPL1	1	0	0	down	NA	1.26343e-09	0.165963	0.686114	0.520151	0.00245756	-0.206837	1.15799	1.36483	5_preB_G2MS	3_proB_G2MS	NA
RAB10	1	0	0	down	NA	2.22875e-15	0.165245	0.885648	0.720403	1	-0.0174664	1.08163	1.0991	5_preB_G2MS	3_proB_G2MS	NA
NGFRAP1	1	0	0	down	NA	2.31828e-16	0.164855	0.85881	0.693955	1	-0.0693807	1.1405	1.20988	5_preB_G2MS	3_proB_G2MS	NA
PDCL3	1	0	0	down	NA	6.6094e-17	0.164476	0.887398	0.722922	1	-0.026731	1.04145	1.06818	5_preB_G2MS	3_proB_G2MS	NA
CCDC28B	1	0	0	down	NA	1.39215e-25	0.163588	0.962077	0.798489	1	0.0269231	1.07692	1.05	5_preB_G2MS	3_proB_G2MS	NA
LYL1	1	0	0	down	NA	1.54561e-12	0.163475	0.852392	0.688917	1	-0.0914692	1.09881	1.19028	5_preB_G2MS	3_proB_G2MS	NA
CCT6A	1	0	0	down	NA	2.59129e-09	0.162089	0.528588	0.366499	0.604511	-0.0692749	1.36015	1.42942	5_preB_G2MS	3_proB_G2MS	NA
HDAC2	1	0	0	down	NA	7.32229e-09	0.161681	0.470245	0.308564	0.252844	-0.138576	1.36233	1.50091	5_preB_G2MS	3_proB_G2MS	NA
PGK1	1	0	0	down	NA	2.92022e-10	0.160595	0.333139	0.172544	1.93118e-05	-0.318976	1.6308	1.94977	5_preB_G2MS	3_proB_G2MS	NA
HYI	1	0	0	down	NA	5.29229e-14	0.16042	0.890898	0.730479	1	-0.0225898	1.08021	1.1028	5_preB_G2MS	3_proB_G2MS	NA
GTF3A	1	0	0	down	NA	5.0136e-12	0.160208	0.464994	0.304786	8.88203e-05	-0.289928	1.42203	1.71196	5_preB_G2MS	3_proB_G2MS	NA
ATXN10	1	0	0	down	NA	2.17332e-09	0.159759	0.684947	0.525189	1	-0.0213135	1.13519	1.1565	5_preB_G2MS	3_proB_G2MS	NA
CALCOCO2	1	0	0	down	NA	1.02779e-09	0.159557	0.814469	0.654912	1	-0.0554102	1.07233	1.12774	5_preB_G2MS	3_proB_G2MS	NA
TCF7L2	1	0	0	down	NA	1.47536e-28	0.158912	0.98133	0.822418	NA	-0.0496454	1	1.04965	5_preB_G2MS	3_proB_G2MS	NA
LITAF	1	0	0	down	NA	3.43884e-08	0.158611	0.715286	0.556675	1	-0.00861587	1.19877	1.20739	5_preB_G2MS	3_proB_G2MS	NA
KAZALD1	1	0	0	down	NA	1.18427e-14	0.158199	0.99825	0.84005	NA	-1.05512	0	1.05512	5_preB_G2MS	3_proB_G2MS	NA
ALOX5AP	1	0	0	down	NA	1.11679e-22	0.158152	0.95916	0.801008	1	-0.116998	1.02857	1.14557	5_preB_G2MS	3_proB_G2MS	NA
MND1	1	0	0	down	NA	9.895e-07	0.157991	0.731039	0.573048	1	-0.0509154	1.14967	1.20059	5_preB_G2MS	3_proB_G2MS	NA
ZMIZ1	1	0	0	down	NA	2.5557e-22	0.156958	0.950408	0.793451	1	0.0161406	1.05882	1.04268	5_preB_G2MS	3_proB_G2MS	NA
TK1	1	0	0	down	NA	3.3478e-07	0.156634	0.494166	0.337531	1	-0.0148583	1.89389	1.90875	5_preB_G2MS	3_proB_G2MS	NA
ENO1	1	0	0	down	NA	4.80445e-15	0.156102	0.270712	0.11461	1.36953e-11	-0.358711	2.8888	3.24751	5_preB_G2MS	3_proB_G2MS	NA
SORBS3	1	0	0	down	NA	6.08025e-27	0.155625	0.983081	0.827456	NA	-1.0438	0	1.0438	5_preB_G2MS	3_proB_G2MS	NA
ARPC5L	1	0	0	down	NA	4.71749e-09	0.1556	0.634189	0.478589	0.793315	-0.0957747	1.16268	1.25845	5_preB_G2MS	3_proB_G2MS	NA
CCT5	1	0	0	down	NA	1.4757e-07	0.155422	0.533256	0.377834	0.0611602	-0.155764	1.30375	1.45951	5_preB_G2MS	3_proB_G2MS	NA
COL5A1	1	0	0	down	NA	9.8512e-24	0.155375	0.994166	0.838791	NA	-1.07812	0	1.07812	5_preB_G2MS	3_proB_G2MS	NA
BZW2	1	0	0	down	NA	4.58524e-13	0.155232	0.79755	0.642317	1	-0.0767951	1.09222	1.16901	5_preB_G2MS	3_proB_G2MS	NA
NDUFC1	1	0	0	down	NA	1.09086e-09	0.154436	0.791715	0.63728	1	-0.0554097	1.10084	1.15625	5_preB_G2MS	3_proB_G2MS	NA
PSMB9	1	0	0	down	NA	3.52415e-08	0.154418	0.339557	0.185139	1.2793e-09	-0.385589	1.66696	2.05255	5_preB_G2MS	3_proB_G2MS	NA
CDCA7L	1	0	0	down	NA	2.08589e-08	0.154395	0.570012	0.415617	0.895209	-0.144101	1.29986	1.44397	5_preB_G2MS	3_proB_G2MS	NA
CANX	1	0	0	down	NA	2.00406e-11	0.154101	0.7007	0.546599	1	-0.0403509	1.19298	1.23333	5_preB_G2MS	3_proB_G2MS	NA
TSC22D3	1	0	0	down	NA	2.30225e-10	0.152995	0.532089	0.379093	1	-0.0748054	2.0611	2.1359	5_preB_G2MS	3_proB_G2MS	NA
NDUFB11	1	0	0	down	NA	1.49409e-09	0.152427	0.324971	0.172544	1.05296e-07	-0.269719	1.53241	1.80213	5_preB_G2MS	3_proB_G2MS	NA
PHGDH	1	0	0	down	NA	9.24242e-06	0.152321	0.612019	0.459698	0.000351048	-0.249586	1.23759	1.48718	5_preB_G2MS	3_proB_G2MS	NA
ESD	1	0	0	down	NA	1.49053e-08	0.15227	0.334889	0.18262	1.23172e-10	-0.395811	1.53947	1.93529	5_preB_G2MS	3_proB_G2MS	NA
PA2G4	1	0	0	down	NA	2.35634e-11	0.152259	0.279463	0.127204	1.72693e-09	-0.515237	2.07206	2.5873	5_preB_G2MS	3_proB_G2MS	NA
CLEC11A	1	0	0	down	NA	2.05686e-14	0.15214	0.852392	0.700252	1	-0.0243797	1.32016	1.34454	5_preB_G2MS	3_proB_G2MS	NA
LSM6	1	0	0	down	NA	1.75954e-07	0.151376	0.592182	0.440806	0.526272	-0.108456	1.18884	1.2973	5_preB_G2MS	3_proB_G2MS	NA
THOC7	1	0	0	down	NA	2.18669e-07	0.151301	0.545508	0.394207	1	-0.0524875	1.27599	1.32848	5_preB_G2MS	3_proB_G2MS	NA
PDIA6	1	0	0	down	NA	1.99085e-08	0.150863	0.400233	0.24937	0.00017728	-0.284308	1.53113	1.81544	5_preB_G2MS	3_proB_G2MS	NA
PHB	1	0	0	down	NA	8.74677e-11	0.150656	0.712369	0.561713	1	-0.025524	1.21298	1.23851	5_preB_G2MS	3_proB_G2MS	NA
UCHL3	1	0	0	down	NA	6.8895e-12	0.149927	0.856476	0.706549	1	-0.0379636	1.06504	1.103	5_preB_G2MS	3_proB_G2MS	NA
CD69	1	0	0	down	NA	3.21595e-11	0.149008	0.764877	0.615869	1	0.0381564	1.59553	1.55738	5_preB_G2MS	3_proB_G2MS	NA
APPL1	1	0	0	down	NA	3.04229e-09	0.148972	0.781214	0.632242	1	-0.024621	1.09867	1.12329	5_preB_G2MS	3_proB_G2MS	NA
P4HB	1	0	0	down	NA	4.03101e-08	0.148941	0.614936	0.465995	0.547826	-0.124114	1.18485	1.30896	5_preB_G2MS	3_proB_G2MS	NA
GNAQ	1	0	0	down	NA	3.31932e-23	0.148568	0.96091	0.812343	1	0.0142242	1.07463	1.0604	5_preB_G2MS	3_proB_G2MS	NA
MDM2	1	0	0	down	NA	1.69924e-13	0.148437	0.899067	0.75063	1	-0.141356	1.04046	1.18182	5_preB_G2MS	3_proB_G2MS	NA
HPCAL1	1	0	0	down	NA	2.52506e-12	0.14826	0.87748	0.729219	1	-0.0361019	1.04762	1.08372	5_preB_G2MS	3_proB_G2MS	NA
CMTM3	1	0	0	down	NA	1.40723e-24	0.148188	0.989498	0.84131	NA	-1.10317	0	1.10317	5_preB_G2MS	3_proB_G2MS	NA
PRDX4	1	0	0	down	NA	9.81781e-17	0.147825	0.890898	0.743073	1	-0.0525847	1.07487	1.12745	5_preB_G2MS	3_proB_G2MS	NA
PSME1	1	1	0	down	down	5.2666e-16	0.146488	0.185531	0.0390428	0	-1.10916	2.04943	3.15858	5_preB_G2MS	3_proB_G2MS	NA
IER3IP1-1	1	0	0	down	NA	5.1826e-08	0.146368	0.679113	0.532746	1	-0.0225386	1.14727	1.16981	5_preB_G2MS	3_proB_G2MS	NA
GSDMD	1	0	0	down	NA	2.31837e-06	0.146257	0.728121	0.581864	1	-0.0837815	1.11803	1.20181	5_preB_G2MS	3_proB_G2MS	NA
PM20D2	1	0	0	down	NA	2.72896e-17	0.145168	0.932322	0.787154	1	0.00438686	1.05172	1.04734	5_preB_G2MS	3_proB_G2MS	NA
GALNT2	1	0	0	down	NA	5.67998e-13	0.144825	0.865228	0.720403	1	-0.026559	1.09957	1.12613	5_preB_G2MS	3_proB_G2MS	NA
PTGER2	1	0	0	down	NA	6.22394e-25	0.144503	0.988331	0.843829	NA	-1.20968	0	1.20968	5_preB_G2MS	3_proB_G2MS	NA
HNRNPF	1	0	0	down	NA	7.71705e-09	0.144489	0.274212	0.129723	0.00213025	-0.354265	2.17685	2.53111	5_preB_G2MS	3_proB_G2MS	NA
PYCARD	1	0	0	down	NA	1.48646e-10	0.144259	0.816803	0.672544	1	-0.0769966	1.11146	1.18846	5_preB_G2MS	3_proB_G2MS	NA
CBX5	1	0	0	down	NA	9.73007e-06	0.14354	0.516336	0.372796	0.886863	-0.0936097	1.30398	1.39759	5_preB_G2MS	3_proB_G2MS	NA
GSN	1	0	0	down	NA	4.43078e-24	0.143428	0.985998	0.842569	NA	-1.056	0	1.056	5_preB_G2MS	3_proB_G2MS	NA
SSBP1	1	0	0	down	NA	8.09014e-08	0.143261	0.44049	0.297229	0.0930253	-0.156118	1.37435	1.53047	5_preB_G2MS	3_proB_G2MS	NA
G3BP1	1	0	0	down	NA	5.12355e-07	0.142914	0.714702	0.571788	1	-0.00889571	1.1411	1.15	5_preB_G2MS	3_proB_G2MS	NA
GNG2	1	0	0	down	NA	3.18554e-10	0.142148	0.875146	0.732997	1	-0.0528126	1.09813	1.15094	5_preB_G2MS	3_proB_G2MS	NA
C4orf27	1	0	0	down	NA	5.98068e-07	0.142091	0.78063	0.638539	1	-0.0194232	1.08511	1.10453	5_preB_G2MS	3_proB_G2MS	NA
MLXIP	1	0	0	down	NA	1.86663e-06	0.141913	0.679697	0.537783	1	-0.102723	1.30055	1.40327	5_preB_G2MS	3_proB_G2MS	NA
JAK1	1	0	0	down	NA	1.2527e-07	0.141683	0.722287	0.580605	1	-0.051745	1.15546	1.20721	5_preB_G2MS	3_proB_G2MS	NA
FYTTD1	1	0	0	down	NA	1.22948e-09	0.141369	0.82147	0.680101	1	-0.00892903	1.10131	1.11024	5_preB_G2MS	3_proB_G2MS	NA
MGST2	1	0	0	down	NA	7.12874e-16	0.141306	0.909568	0.768262	1	-0.00852034	1.08387	1.09239	5_preB_G2MS	3_proB_G2MS	NA
IMPDH1	1	0	0	down	NA	8.61712e-18	0.141168	0.950992	0.809824	1	0.00126143	1.04762	1.04636	5_preB_G2MS	3_proB_G2MS	NA
BCAP31	1	0	0	down	NA	1.13476e-08	0.140655	0.759043	0.618388	1	-0.0595897	1.08232	1.14191	5_preB_G2MS	3_proB_G2MS	NA
MED13L	1	0	0	down	NA	1.02506e-17	0.140501	0.927655	0.787154	1	-0.034978	1.02419	1.05917	5_preB_G2MS	3_proB_G2MS	NA
CLEC2B	1	0	0	down	NA	4.38299e-13	0.140435	0.85706	0.716625	1	-0.0278458	1.16327	1.19111	5_preB_G2MS	3_proB_G2MS	NA
ANKRD28	1	0	0	down	NA	7.05674e-22	0.140251	0.93874	0.798489	1	0.0916667	1.26667	1.175	5_preB_G2MS	3_proB_G2MS	NA
CMPK1	1	0	0	down	NA	7.58568e-07	0.14017	0.574679	0.434509	0.0827901	-0.126072	1.22359	1.34967	5_preB_G2MS	3_proB_G2MS	NA
SORL1	1	0	0	down	NA	6.53215e-20	0.139937	0.958576	0.81864	1	-0.0553599	1.01408	1.06944	5_preB_G2MS	3_proB_G2MS	NA
HPRT1	1	0	0	down	NA	1.71376e-06	0.139381	0.465578	0.326196	1	0.0028221	1.38974	1.38692	5_preB_G2MS	3_proB_G2MS	NA
GUK1	1	0	0	down	NA	2.23696e-07	0.139363	0.513419	0.374055	0.039933	-0.145516	1.27098	1.4165	5_preB_G2MS	3_proB_G2MS	NA
TRIP6	1	0	0	down	NA	2.92762e-20	0.139075	0.961494	0.822418	NA	-0.0283688	1	1.02837	5_preB_G2MS	3_proB_G2MS	NA
BIN1	1	0	0	down	NA	1.22493e-19	0.138862	0.956243	0.81738	1	-0.0216092	1.02667	1.04828	5_preB_G2MS	3_proB_G2MS	NA
KTN1	1	0	0	down	NA	7.06978e-07	0.138826	0.472579	0.333753	1	-0.031513	1.49779	1.5293	5_preB_G2MS	3_proB_G2MS	NA
FAM213A	1	0	0	down	NA	8.48027e-12	0.138768	0.878063	0.739295	1	-0.0537411	1.0622	1.11594	5_preB_G2MS	3_proB_G2MS	NA
BLNK	1	0	0	down	NA	5.85444e-07	0.138608	0.729288	0.59068	1	-0.0922016	1.17241	1.26462	5_preB_G2MS	3_proB_G2MS	NA
SELL	1	0	0	down	NA	6.12753e-20	0.138501	0.936989	0.798489	1	0.0361111	1.36111	1.325	5_preB_G2MS	3_proB_G2MS	NA
MYC	1	0	0	down	NA	1.82384e-22	0.138372	0.954492	0.816121	1	-0.0781524	1.14103	1.21918	5_preB_G2MS	3_proB_G2MS	NA
LSM7	1	0	0	down	NA	1.51084e-13	0.138238	0.233956	0.0957179	1.51186e-09	-0.477558	1.91241	2.38997	5_preB_G2MS	3_proB_G2MS	NA
IARS2	1	0	0	down	NA	1.19196e-13	0.138139	0.917736	0.779597	1	-0.00316109	1.04255	1.04571	5_preB_G2MS	3_proB_G2MS	NA
RUVBL2	1	0	0	down	NA	2.89475e-06	0.138014	0.673279	0.535264	1	-0.0334834	1.15893	1.19241	5_preB_G2MS	3_proB_G2MS	NA
RANBP1	1	0	0	down	NA	2.39134e-13	0.137978	0.189615	0.0516373	4.30404e-06	-0.566899	3.2671	3.834	5_preB_G2MS	3_proB_G2MS	NA
PPP3CC	1	0	0	down	NA	9.90463e-09	0.137518	0.854142	0.716625	1	-0.032	1.088	1.12	5_preB_G2MS	3_proB_G2MS	NA
SEP15	1	0	0	down	NA	1.64312e-07	0.136639	0.404901	0.268262	1.66423e-06	-0.27616	1.47255	1.74871	5_preB_G2MS	3_proB_G2MS	NA
ZCCHC7	1	0	0	down	NA	1.1288e-06	0.136244	0.560677	0.424433	0.0137099	-0.256918	1.30544	1.56236	5_preB_G2MS	3_proB_G2MS	NA
DCK	1	0	0	down	NA	0.0009917	0.136141	0.506418	0.370277	1	-0.0142931	1.38771	1.402	5_preB_G2MS	3_proB_G2MS	NA
EDEM1	1	0	0	down	NA	2.31887e-13	0.1355	0.911319	0.775819	1	-0.0167061	1.03947	1.05618	5_preB_G2MS	3_proB_G2MS	NA
SNORA76	1	0	0	down	NA	9.04611e-08	0.135363	0.532089	0.396725	1	-0.0770256	1.77057	1.8476	5_preB_G2MS	3_proB_G2MS	NA
FAM212A	1	0	0	down	NA	2.19158e-21	0.135353	0.976663	0.84131	NA	-0.0714286	1	1.07143	5_preB_G2MS	3_proB_G2MS	NA
AIMP1	1	0	0	down	NA	4.98259e-08	0.135282	0.668028	0.532746	1	-0.0803272	1.21617	1.2965	5_preB_G2MS	3_proB_G2MS	NA
TNFRSF1A	1	0	0	down	NA	3.00703e-20	0.135224	0.994166	0.858942	NA	-1.04464	0	1.04464	5_preB_G2MS	3_proB_G2MS	NA
GABPB1	1	0	0	down	NA	2.64165e-07	0.135109	0.805134	0.670025	1	0.0140101	1.1018	1.08779	5_preB_G2MS	3_proB_G2MS	NA
RPN2	1	0	0	down	NA	1.06837e-07	0.135099	0.749708	0.61461	1	-0.0678505	1.11189	1.17974	5_preB_G2MS	3_proB_G2MS	NA
ERAP2	1	0	0	down	NA	3.02468e-15	0.134787	0.928238	0.793451	1	-0.0752033	1.01626	1.09146	5_preB_G2MS	3_proB_G2MS	NA
FKBP1A	1	0	0	down	NA	8.74789e-09	0.134609	0.327305	0.192695	4.74156e-12	-0.387062	1.50997	1.89704	5_preB_G2MS	3_proB_G2MS	NA
ISG20	1	0	0	down	NA	1.18873e-10	0.13436	0.83839	0.70403	1	-0.00892542	1.21661	1.22553	5_preB_G2MS	3_proB_G2MS	NA
OSTC	1	0	0	down	NA	3.04035e-07	0.133828	0.614936	0.481108	0.0495009	-0.126478	1.21818	1.34466	5_preB_G2MS	3_proB_G2MS	NA
NDUFA11	1	0	0	down	NA	1.19415e-06	0.133537	0.404317	0.270781	0.200169	-0.155933	1.4192	1.57513	5_preB_G2MS	3_proB_G2MS	NA
DNAJA1	1	0	0	down	NA	1.55375e-05	0.13329	0.574096	0.440806	0.148609	-0.218018	1.3	1.51802	5_preB_G2MS	3_proB_G2MS	NA
EIF2AK4	1	0	0	down	NA	3.32839e-13	0.133287	0.915403	0.782116	1	-0.0359976	1.02759	1.06358	5_preB_G2MS	3_proB_G2MS	NA
CNBP	1	0	0	down	NA	9.95288e-09	0.133285	0.336056	0.202771	0.00193173	-0.247228	1.64851	1.89573	5_preB_G2MS	3_proB_G2MS	NA
XRCC6	1	0	0	down	NA	3.87181e-05	0.133268	0.383897	0.25063	1.02998e-05	-0.271667	1.48295	1.75462	5_preB_G2MS	3_proB_G2MS	NA
DNPEP	1	0	0	down	NA	2.36655e-13	0.133231	0.900233	0.767003	1	-0.0226015	1.05848	1.08108	5_preB_G2MS	3_proB_G2MS	NA
RNASET2	1	0	0	down	NA	4.22245e-17	0.133009	0.918903	0.785894	1	-0.0640288	1.03597	1.1	5_preB_G2MS	3_proB_G2MS	NA
RASD1	1	0	0	down	NA	1.98359e-20	0.13201	0.963244	0.831234	1	-0.0400379	1.07937	1.1194	5_preB_G2MS	3_proB_G2MS	NA
ABHD17B	1	0	0	down	NA	6.46883e-09	0.131647	0.864644	0.732997	1	0.0103286	1.09052	1.08019	5_preB_G2MS	3_proB_G2MS	NA
EIF2S2	1	0	0	down	NA	4.7048e-06	0.131594	0.508168	0.376574	1	-0.120098	1.37485	1.49495	5_preB_G2MS	3_proB_G2MS	NA
SLC27A3	1	0	0	down	NA	6.06872e-20	0.131454	0.970245	0.838791	1	-0.0232843	1.03922	1.0625	5_preB_G2MS	3_proB_G2MS	NA
SH3BGRL3	1	0	0	down	NA	1.38644e-09	0.130747	0.304551	0.173804	1.66423e-06	-0.424722	1.83138	2.2561	5_preB_G2MS	3_proB_G2MS	NA
DPY30	1	0	0	down	NA	2.81135e-05	0.130393	0.68203	0.551637	1	-0.0362025	1.1211	1.1573	5_preB_G2MS	3_proB_G2MS	NA
BOLA3	1	0	0	down	NA	6.71773e-08	0.13034	0.825554	0.695214	1	0.00746289	1.07358	1.06612	5_preB_G2MS	3_proB_G2MS	NA
BLVRA	1	0	0	down	NA	5.33714e-16	0.130203	0.946324	0.816121	1	-0.00446694	1.04348	1.04795	5_preB_G2MS	3_proB_G2MS	NA
UBE2N	1	0	0	down	NA	2.92987e-06	0.12987	0.434656	0.304786	0.0611602	-0.138298	1.36533	1.50362	5_preB_G2MS	3_proB_G2MS	NA
TCTEX1D2	1	0	0	down	NA	0.000110911	0.129773	0.697783	0.56801	1	0.0173745	1.16023	1.14286	5_preB_G2MS	3_proB_G2MS	NA
TM7SF3	1	0	0	down	NA	6.8061e-09	0.129091	0.88098	0.751889	1	-0.0425251	1.05392	1.09645	5_preB_G2MS	3_proB_G2MS	NA
EIF2AK2	1	0	0	down	NA	4.878e-09	0.128887	0.851809	0.722922	1	0.0281317	1.08268	1.05455	5_preB_G2MS	3_proB_G2MS	NA
POLR2I	1	0	0	down	NA	1.46311e-06	0.128743	0.575846	0.447103	0.555126	-0.117389	1.23796	1.35535	5_preB_G2MS	3_proB_G2MS	NA
NGLY1	1	0	0	down	NA	3.31105e-06	0.128653	0.735706	0.607053	1	-0.0662676	1.13245	1.19872	5_preB_G2MS	3_proB_G2MS	NA
GADD45A	1	0	0	down	NA	1.86663e-06	0.128478	0.793466	0.664987	1	-0.10316	1.11864	1.2218	5_preB_G2MS	3_proB_G2MS	NA
MRPL15	1	0	0	down	NA	5.96549e-09	0.128461	0.841307	0.712846	1	0.0232843	1.10662	1.08333	5_preB_G2MS	3_proB_G2MS	NA
GNG7	1	0	0	down	NA	0.000514306	0.128456	0.603267	0.474811	1	-0.0522006	1.31471	1.36691	5_preB_G2MS	3_proB_G2MS	NA
ATP6V0E2	1	0	0	down	NA	2.5108e-11	0.128434	0.913069	0.784635	1	0.029436	1.04698	1.01754	5_preB_G2MS	3_proB_G2MS	NA
UCK2	1	0	0	down	NA	5.36759e-16	0.128268	0.946908	0.81864	1	-0.0306777	1.01099	1.04167	5_preB_G2MS	3_proB_G2MS	NA
C11orf31	1	0	0	down	NA	1.9649e-06	0.128221	0.407818	0.279597	0.0205642	-0.179762	1.4601	1.63986	5_preB_G2MS	3_proB_G2MS	NA
CFDP1	1	0	0	down	NA	2.54965e-06	0.12782	0.746208	0.618388	1	-0.0227837	1.13563	1.15842	5_preB_G2MS	3_proB_G2MS	NA
TMEM14C	1	0	0	down	NA	3.78534e-05	0.127762	0.651692	0.523929	1	-0.0175082	1.1809	1.19841	5_preB_G2MS	3_proB_G2MS	NA
CTDSP1	1	0	0	down	NA	2.57116e-08	0.127655	0.859393	0.731738	1	0.0672667	1.09544	1.02817	5_preB_G2MS	3_proB_G2MS	NA
LEF1	1	0	0	down	NA	7.70571e-05	0.127373	0.624854	0.497481	1	0.0658294	1.42924	1.36341	5_preB_G2MS	3_proB_G2MS	NA
C1QTNF4	1	0	0	down	NA	1.7576e-22	0.127361	0.990082	0.86272	NA	-1.12844	0	1.12844	5_preB_G2MS	3_proB_G2MS	NA
TIMM13	1	0	0	down	NA	1.87696e-09	0.127319	0.689032	0.561713	1	-0.0382998	1.27205	1.31034	5_preB_G2MS	3_proB_G2MS	NA
NAA10	1	0	0	down	NA	3.20178e-06	0.127178	0.571762	0.444584	1	-0.0695317	1.22752	1.29705	5_preB_G2MS	3_proB_G2MS	NA
LMAN1	1	0	0	down	NA	3.4099e-10	0.127091	0.890315	0.763224	1	-0.0265957	1.06383	1.09043	5_preB_G2MS	3_proB_G2MS	NA
FBXW7	1	0	0	down	NA	5.29229e-14	0.126953	0.931739	0.804786	1	-0.122746	1.02564	1.14839	5_preB_G2MS	3_proB_G2MS	NA
ARL6IP5	1	0	0	down	NA	3.31551e-05	0.126931	0.74154	0.61461	0.919318	-0.103122	1.13544	1.23856	5_preB_G2MS	3_proB_G2MS	NA
PSMC3	1	0	0	down	NA	5.7394e-05	0.125981	0.483664	0.357683	1	-0.0450316	1.34124	1.38627	5_preB_G2MS	3_proB_G2MS	NA
SATB1	1	0	0	down	NA	1.95172e-18	0.125898	0.96091	0.835013	1	-0.0246098	1.07463	1.09924	5_preB_G2MS	3_proB_G2MS	NA
MLLT11	1	0	0	down	NA	2.26623e-08	0.125831	0.890315	0.764484	1	-0.00554671	1.03723	1.04278	5_preB_G2MS	3_proB_G2MS	NA
TAF9	1	0	0	down	NA	4.5548e-07	0.125549	0.655776	0.530227	1	-0.056941	1.20847	1.26542	5_preB_G2MS	3_proB_G2MS	NA
PLEKHF2	1	0	0	down	NA	3.97448e-06	0.125182	0.819137	0.693955	1	-0.0333599	1.06129	1.09465	5_preB_G2MS	3_proB_G2MS	NA
MYL6B	1	0	0	down	NA	4.08115e-05	0.124954	0.52042	0.395466	0.886863	-0.123312	1.2871	1.41042	5_preB_G2MS	3_proB_G2MS	NA
RARRES3	1	0	0	down	NA	1.02779e-09	0.124628	0.905484	0.780856	1	-0.0191571	1.05556	1.07471	5_preB_G2MS	3_proB_G2MS	NA
SRM	1	0	0	down	NA	7.88726e-12	0.124441	0.828471	0.70403	1	0.101013	1.30952	1.20851	5_preB_G2MS	3_proB_G2MS	NA
PIGP	1	0	0	down	NA	5.43243e-10	0.124016	0.897316	0.7733	1	-0.0268939	1.03977	1.06667	5_preB_G2MS	3_proB_G2MS	NA
GIMAP2	1	0	0	down	NA	4.7024e-13	0.123786	0.939907	0.816121	NA	-0.109589	1	1.10959	5_preB_G2MS	3_proB_G2MS	NA
AAMDC	1	0	0	down	NA	2.15081e-07	0.12347	0.880397	0.756927	1	-0.0112473	1.09756	1.10881	5_preB_G2MS	3_proB_G2MS	NA
ETFB	1	0	0	down	NA	1.20127e-05	0.123448	0.690198	0.566751	1	-0.0764902	1.09793	1.17442	5_preB_G2MS	3_proB_G2MS	NA
RYBP	1	0	0	down	NA	3.93322e-13	0.123082	0.932905	0.809824	1	-0.0401382	1.02609	1.06623	5_preB_G2MS	3_proB_G2MS	NA
MORF4L2	1	0	0	down	NA	3.87181e-05	0.122948	0.712369	0.589421	1	-0.0900521	1.13387	1.22393	5_preB_G2MS	3_proB_G2MS	NA
ERO1LB	1	0	0	down	NA	6.84958e-09	0.122886	0.879813	0.756927	1	-0.0217566	1.09223	1.11399	5_preB_G2MS	3_proB_G2MS	NA
RIMKLB	1	0	0	down	NA	3.29882e-08	0.122886	0.879813	0.756927	1	-0.0149404	1.06796	1.0829	5_preB_G2MS	3_proB_G2MS	NA
IARS	1	0	0	down	NA	5.30334e-10	0.12285	0.896149	0.7733	1	-0.0163546	1.02809	1.04444	5_preB_G2MS	3_proB_G2MS	NA
CPT1A	1	0	0	down	NA	4.17084e-09	0.122757	0.897316	0.774559	1	-0.0320912	1.08523	1.11732	5_preB_G2MS	3_proB_G2MS	NA
RNF138	1	0	0	down	NA	7.57173e-07	0.122672	0.795216	0.672544	1	0.017094	1.09402	1.07692	5_preB_G2MS	3_proB_G2MS	NA
RNF187	1	0	0	down	NA	1.17835e-06	0.122626	0.835473	0.712846	1	-0.0191303	1.09929	1.11842	5_preB_G2MS	3_proB_G2MS	NA
SSR3	1	0	0	down	NA	1.23039e-05	0.12242	0.726954	0.604534	1	-0.0384071	1.13675	1.17516	5_preB_G2MS	3_proB_G2MS	NA
CYCS	1	0	0	down	NA	1.08776e-05	0.122312	0.355309	0.232997	1	-0.0558069	1.61086	1.66667	5_preB_G2MS	3_proB_G2MS	NA
C16orf80	1	0	0	down	NA	1.79165e-05	0.12231	0.775963	0.653652	1	-0.0829545	1.0625	1.14545	5_preB_G2MS	3_proB_G2MS	NA
CHST11	1	0	0	down	NA	4.29065e-09	0.122238	0.887981	0.765743	1	-0.0277218	1.02604	1.05376	5_preB_G2MS	3_proB_G2MS	NA
CCDC107	1	0	0	down	NA	1.67766e-06	0.1222	0.824971	0.702771	1	-0.0201695	1.09	1.11017	5_preB_G2MS	3_proB_G2MS	NA
OAS3	1	0	0	down	NA	9.76102e-20	0.122138	0.992415	0.870277	NA	-1.01942	0	1.01942	5_preB_G2MS	3_proB_G2MS	NA
VSIG10	1	0	0	down	NA	2.76178e-15	0.121906	0.955659	0.833753	1	-0.0171451	1.01316	1.0303	5_preB_G2MS	3_proB_G2MS	NA
RP1-3J17.3	1	0	0	down	NA	4.36896e-09	0.121645	0.831972	0.710327	1	-0.0897947	1.13194	1.22174	5_preB_G2MS	3_proB_G2MS	NA
PAFAH1B3	1	0	0	down	NA	0.000555354	0.121642	0.673279	0.551637	1	-0.0685795	1.13929	1.20787	5_preB_G2MS	3_proB_G2MS	NA
PARVG	1	0	0	down	NA	5.36495e-08	0.121506	0.873396	0.751889	1	-0.0185034	1.03226	1.05076	5_preB_G2MS	3_proB_G2MS	NA
NMI	1	0	0	down	NA	1.77859e-05	0.121384	0.787631	0.666247	1	-0.0753784	1.09066	1.16604	5_preB_G2MS	3_proB_G2MS	NA
TMEM87A	1	0	0	down	NA	1.64165e-08	0.121349	0.883314	0.761965	1	0.000343915	1.085	1.08466	5_preB_G2MS	3_proB_G2MS	NA
PDZD11	1	0	0	down	NA	4.5479e-07	0.121321	0.875729	0.754408	1	-0.0244131	1.04225	1.06667	5_preB_G2MS	3_proB_G2MS	NA
UBL3	1	0	0	down	NA	1.24078e-14	0.120619	0.948075	0.827456	1	-0.0179611	1.01124	1.0292	5_preB_G2MS	3_proB_G2MS	NA
FKBP8	1	0	0	down	NA	2.6359e-06	0.120541	0.742707	0.622166	1	-0.0498186	1.12018	1.17	5_preB_G2MS	3_proB_G2MS	NA
MTDH	1	0	0	down	NA	6.30726e-06	0.120303	0.388565	0.268262	0.0560312	-0.201766	1.54866	1.75043	5_preB_G2MS	3_proB_G2MS	NA
MAPKAPK2	1	0	0	down	NA	7.82324e-08	0.120191	0.858226	0.738035	1	-0.0516184	1.07819	1.12981	5_preB_G2MS	3_proB_G2MS	NA
ADRBK1	1	0	0	down	NA	5.63428e-06	0.119996	0.805134	0.685139	1	-0.0121437	1.07186	1.084	5_preB_G2MS	3_proB_G2MS	NA
MAGED1	1	0	0	down	NA	1.67657e-06	0.119922	0.837806	0.717884	1	-0.0719103	1.05755	1.12946	5_preB_G2MS	3_proB_G2MS	NA
RAC1	1	0	0	down	NA	0.000196284	0.119821	0.362894	0.243073	4.8613e-06	-0.280971	1.46612	1.74709	5_preB_G2MS	3_proB_G2MS	NA
NDUFB1	1	0	0	down	NA	5.47645e-05	0.119728	0.364061	0.244332	0.0612481	-0.181942	1.56972	1.75167	5_preB_G2MS	3_proB_G2MS	NA
PEBP1	1	0	0	down	NA	1.47847e-09	0.119653	0.317386	0.197733	0.304749	0.00708181	2.18291	2.17582	5_preB_G2MS	3_proB_G2MS	NA
BSG	1	0	0	down	NA	6.1319e-05	0.119649	0.579347	0.459698	1	-0.0849506	1.2344	1.31935	5_preB_G2MS	3_proB_G2MS	NA
SMS	1	0	0	down	NA	8.07795e-05	0.11959	0.405484	0.285894	0.0204221	-0.133675	1.48184	1.61552	5_preB_G2MS	3_proB_G2MS	NA
TMEM50A	1	0	0	down	NA	7.55003e-05	0.119464	0.58168	0.462217	1	-0.0498009	1.20781	1.25761	5_preB_G2MS	3_proB_G2MS	NA
JTB	1	0	0	down	NA	5.35938e-05	0.118943	0.492999	0.374055	0.158367	-0.135406	1.30725	1.44266	5_preB_G2MS	3_proB_G2MS	NA
MCM3	1	0	0	down	NA	8.28608e-05	0.118666	0.496499	0.377834	1	-0.134823	1.63036	1.76518	5_preB_G2MS	3_proB_G2MS	NA
JADE2	1	0	0	down	NA	4.00928e-16	0.118554	0.966161	0.847607	NA	-0.0165289	1	1.01653	5_preB_G2MS	3_proB_G2MS	NA
LINC00341	1	0	0	down	NA	2.48296e-09	0.117932	0.902567	0.784635	1	0.0608607	1.1018	1.04094	5_preB_G2MS	3_proB_G2MS	NA
PYURF	1	0	0	down	NA	7.20364e-06	0.117825	0.610268	0.492443	1	-0.0279565	1.24251	1.27047	5_preB_G2MS	3_proB_G2MS	NA
GNB4	1	0	0	down	NA	7.73979e-10	0.11771	0.921237	0.803526	1	0.0103989	1.02963	1.01923	5_preB_G2MS	3_proB_G2MS	NA
UQCC2	1	0	0	down	NA	1.06174e-05	0.117662	0.8028	0.685139	1	0.0112189	1.12722	1.116	5_preB_G2MS	3_proB_G2MS	NA
ATF5	1	0	0	down	NA	7.85179e-18	0.117387	0.964994	0.847607	1	-0.00798898	1.03333	1.04132	5_preB_G2MS	3_proB_G2MS	NA
PCNA	1	0	0	down	NA	9.64319e-08	0.117355	0.21937	0.102015	0.704646	0.441116	6.26744	5.82633	5_preB_G2MS	3_proB_G2MS	NA
MYO5C	1	0	0	down	NA	1.42082e-10	0.117221	0.998833	0.881612	NA	-1.02128	0	1.02128	5_preB_G2MS	3_proB_G2MS	NA
TMCO1	1	0	0	down	NA	0.000843829	0.116964	0.613186	0.496222	1	-0.010264	1.22474	1.235	5_preB_G2MS	3_proB_G2MS	NA
CSTF3	1	0	0	down	NA	1.01844e-09	0.116914	0.915403	0.798489	1	-0.0267241	1.04828	1.075	5_preB_G2MS	3_proB_G2MS	NA
NELFE	1	0	0	down	NA	0.000249415	0.11678	0.694866	0.578086	1	0.0354727	1.15488	1.1194	5_preB_G2MS	3_proB_G2MS	NA
RAB34	1	0	0	down	NA	3.69232e-08	0.11646	0.897316	0.780856	1	-0.000587774	1.05114	1.05172	5_preB_G2MS	3_proB_G2MS	NA
BTF3L4	1	0	0	down	NA	3.50873e-05	0.116457	0.738623	0.622166	1	-0.00377976	1.14955	1.15333	5_preB_G2MS	3_proB_G2MS	NA
NANS	1	0	0	down	NA	4.7528e-10	0.116219	0.884481	0.768262	1	-0.0298639	1.03535	1.06522	5_preB_G2MS	3_proB_G2MS	NA
SYNCRIP	1	0	0	down	NA	8.43859e-05	0.11589	0.610852	0.494962	1	-0.0139195	1.27286	1.28678	5_preB_G2MS	3_proB_G2MS	NA
EIF3J	1	0	0	down	NA	3.07415e-05	0.115271	0.705951	0.59068	1	-0.0208547	1.22222	1.24308	5_preB_G2MS	3_proB_G2MS	NA
PBXIP1	1	0	0	down	NA	2.48804e-07	0.115181	0.865811	0.75063	1	-0.0732543	1.07826	1.15152	5_preB_G2MS	3_proB_G2MS	NA
PDE6D	1	0	0	down	NA	2.09017e-05	0.114996	0.868145	0.753149	1	0.0344049	1.07522	1.04082	5_preB_G2MS	3_proB_G2MS	NA
EPRS	1	0	0	down	NA	1.8304e-07	0.114514	0.842474	0.72796	1	-0.0472222	1.07778	1.125	5_preB_G2MS	3_proB_G2MS	NA
NUTF2	1	0	0	down	NA	0.000116111	0.114435	0.55776	0.443325	0.0928815	-0.133574	1.23747	1.37104	5_preB_G2MS	3_proB_G2MS	NA
CDC42SE2	1	0	0	down	NA	3.31782e-05	0.114336	0.74154	0.627204	1	-0.0481285	1.13093	1.17905	5_preB_G2MS	3_proB_G2MS	NA
SH3KBP1	1	0	0	down	NA	2.19132e-05	0.114123	0.736289	0.622166	1	-0.0495575	1.15044	1.2	5_preB_G2MS	3_proB_G2MS	NA
F2R	1	0	0	down	NA	2.82854e-19	0.113998	0.991832	0.877834	NA	-1.04124	0	1.04124	5_preB_G2MS	3_proB_G2MS	NA
PPM1F	1	0	0	down	NA	1.72129e-19	0.11397	0.984247	0.870277	NA	-1.03883	0	1.03883	5_preB_G2MS	3_proB_G2MS	NA
CAPG	1	0	0	down	NA	2.58965e-07	0.113597	0.830222	0.716625	1	-0.0761054	1.09278	1.16889	5_preB_G2MS	3_proB_G2MS	NA
ATIC	1	0	0	down	NA	3.45858e-08	0.113347	0.841307	0.72796	1	0.0260076	1.11397	1.08796	5_preB_G2MS	3_proB_G2MS	NA
SERPINB1	1	0	0	down	NA	6.87449e-08	0.113255	0.842474	0.729219	1	-0.00921619	1.18148	1.1907	5_preB_G2MS	3_proB_G2MS	NA
C2orf69	1	0	0	down	NA	1.80667e-12	0.113155	0.946908	0.833753	1	-0.0159008	1.02198	1.03788	5_preB_G2MS	3_proB_G2MS	NA
LSM2	1	0	0	down	NA	0.000245687	0.112999	0.536173	0.423174	0.258241	-0.131996	1.2239	1.3559	5_preB_G2MS	3_proB_G2MS	NA
CMC1	1	0	0	down	NA	2.747e-07	0.112959	0.893816	0.780856	1	-0.0132626	1.03846	1.05172	5_preB_G2MS	3_proB_G2MS	NA
TP53	1	0	0	down	NA	0.000125281	0.1129	0.719953	0.607053	1	-0.0165064	1.14375	1.16026	5_preB_G2MS	3_proB_G2MS	NA
STT3B	1	0	0	down	NA	4.0725e-05	0.112864	0.736289	0.623426	1	-0.0209992	1.11947	1.14047	5_preB_G2MS	3_proB_G2MS	NA
PYCR2	1	0	0	down	NA	0.000195837	0.112633	0.77888	0.666247	1	-0.00465973	1.11609	1.12075	5_preB_G2MS	3_proB_G2MS	NA
MYLK	1	0	0	down	NA	2.69549e-08	0.112617	0.906068	0.793451	1	0.00170429	1.09317	1.09146	5_preB_G2MS	3_proB_G2MS	NA
POLR2F	1	0	0	down	NA	0.000140251	0.112511	0.693116	0.580605	1	-0.0045616	1.14259	1.14715	5_preB_G2MS	3_proB_G2MS	NA
SND1	1	0	0	down	NA	1.74489e-05	0.112282	0.815053	0.702771	1	-0.0480672	1.05363	1.10169	5_preB_G2MS	3_proB_G2MS	NA
PTOV1	1	0	0	down	NA	0.000294254	0.112271	0.759627	0.647355	1	-0.0307559	1.07282	1.10357	5_preB_G2MS	3_proB_G2MS	NA
STARD3NL	1	0	0	down	NA	1.17835e-06	0.112199	0.871645	0.759446	1	-0.0676583	1.03182	1.09948	5_preB_G2MS	3_proB_G2MS	NA
SUSD3	1	0	0	down	NA	1.78634e-06	0.112199	0.871645	0.759446	1	-0.0351499	1.05909	1.09424	5_preB_G2MS	3_proB_G2MS	NA
REXO2	1	0	0	down	NA	1.22262e-07	0.111911	0.81972	0.707809	1	-0.0428663	1.22006	1.26293	5_preB_G2MS	3_proB_G2MS	NA
EBP	1	0	0	down	NA	0.000408109	0.111751	0.670945	0.559194	1	-0.0645593	1.1383	1.20286	5_preB_G2MS	3_proB_G2MS	NA
FNTA	1	0	0	down	NA	0.000424302	0.111632	0.743874	0.632242	1	0.00890879	1.09795	1.08904	5_preB_G2MS	3_proB_G2MS	NA
FLI1	1	0	0	down	NA	0.00024918	0.111604	0.736289	0.624685	1	-0.0274099	1.15044	1.17785	5_preB_G2MS	3_proB_G2MS	NA
CLEC14A	1	0	0	down	NA	1.84101e-11	0.1116	0.99825	0.88665	NA	-1.14444	0	1.14444	5_preB_G2MS	3_proB_G2MS	NA
PSMB10	1	0	0	down	NA	0.000751203	0.111503	0.761377	0.649874	1	-0.0378797	1.08802	1.1259	5_preB_G2MS	3_proB_G2MS	NA
NOP56	1	0	0	down	NA	0.000574592	0.111119	0.551925	0.440806	1	-0.0511684	1.38802	1.43919	5_preB_G2MS	3_proB_G2MS	NA
PPP3CA	1	0	0	down	NA	1.36249e-05	0.111087	0.806301	0.695214	1	-0.0229513	1.1506	1.17355	5_preB_G2MS	3_proB_G2MS	NA
FKBP3	1	0	0	down	NA	0.000455454	0.11085	0.531505	0.420655	1	-0.0713412	1.28518	1.35652	5_preB_G2MS	3_proB_G2MS	NA
APP	1	0	0	down	NA	3.98363e-07	0.110847	0.872812	0.761965	1	-0.0380807	1.04128	1.07937	5_preB_G2MS	3_proB_G2MS	NA
FADS1	1	0	0	down	NA	6.0741e-07	0.110589	0.907818	0.797229	1	0.0141914	1.09494	1.08075	5_preB_G2MS	3_proB_G2MS	NA
UGT3A2	1	0	0	down	NA	3.16001e-17	0.11047	0.980747	0.870277	NA	-0.17358	1.0303	1.20388	5_preB_G2MS	3_proB_G2MS	NA
ANKRD13D	1	0	0	down	NA	2.73639e-08	0.110432	0.917736	0.807305	1	0.0235016	1.04965	1.02614	5_preB_G2MS	3_proB_G2MS	NA
UBA7	1	0	0	down	NA	1.5499e-09	0.110182	0.928821	0.81864	1	0.00500911	1.03279	1.02778	5_preB_G2MS	3_proB_G2MS	NA
APOA1BP	1	0	0	down	NA	1.63569e-06	0.11018	0.849475	0.739295	1	0.00702168	1.08915	1.08213	5_preB_G2MS	3_proB_G2MS	NA
RILPL2	1	0	0	down	NA	1.02842e-16	0.109951	0.971412	0.861461	1	-0.0341373	1.02041	1.05455	5_preB_G2MS	3_proB_G2MS	NA
GS1-251I9.4	1	0	0	down	NA	3.76351e-06	0.109653	0.864061	0.754408	1	-0.0527347	1.06009	1.11282	5_preB_G2MS	3_proB_G2MS	NA
SLC22A16	1	0	0	down	NA	1.37302e-17	0.109146	0.989498	0.880353	NA	-1.02105	0	1.02105	5_preB_G2MS	3_proB_G2MS	NA
MTHFD1	1	0	0	down	NA	3.31457e-06	0.108708	0.844224	0.735516	1	-0.00502943	1.07116	1.07619	5_preB_G2MS	3_proB_G2MS	NA
ECI2	1	0	0	down	NA	1.74107e-09	0.108644	0.932322	0.823678	1	-0.0628079	1.00862	1.07143	5_preB_G2MS	3_proB_G2MS	NA
NHP2L1	1	0	0	down	NA	0.000432008	0.108617	0.424737	0.316121	0.504596	-0.120359	1.4929	1.61326	5_preB_G2MS	3_proB_G2MS	NA
IL2RG	1	0	0	down	NA	5.58183e-12	0.108552	0.933489	0.824937	1	-0.0552821	1.05263	1.10791	5_preB_G2MS	3_proB_G2MS	NA
CD200	1	0	0	down	NA	7.67369e-14	0.108543	0.95741	0.848866	1	-0.0613014	1.0137	1.075	5_preB_G2MS	3_proB_G2MS	NA
LSMD1	1	0	0	down	NA	0.0004544	0.108514	0.370478	0.261965	1	-0.0689742	1.59314	1.66212	5_preB_G2MS	3_proB_G2MS	NA
LAIR1	1	0	0	down	NA	2.92139e-06	0.108115	0.867561	0.759446	1	-0.049104	1.06608	1.11518	5_preB_G2MS	3_proB_G2MS	NA
EPDR1	1	0	0	down	NA	3.46266e-14	0.108108	0.970828	0.86272	1	-0.0166972	1.02	1.0367	5_preB_G2MS	3_proB_G2MS	NA
DNAJC15	1	0	0	down	NA	0.000555354	0.108085	0.701284	0.593199	1	-0.0252274	1.11719	1.14241	5_preB_G2MS	3_proB_G2MS	NA
SYTL1	1	0	0	down	NA	7.81185e-12	0.108024	0.948075	0.84005	1	-0.0135362	1.03371	1.04724	5_preB_G2MS	3_proB_G2MS	NA
REL	1	0	0	down	NA	2.83971e-05	0.107827	0.815636	0.707809	1	-0.0487233	1.11076	1.15948	5_preB_G2MS	3_proB_G2MS	NA
STIP1	1	0	0	down	NA	0.000701208	0.107688	0.777713	0.670025	1	-0.0071327	1.09974	1.10687	5_preB_G2MS	3_proB_G2MS	NA
SLC8A1-AS1	1	0	0	down	NA	4.64836e-15	0.107247	0.973746	0.866499	1	-0.0687631	1.04444	1.11321	5_preB_G2MS	3_proB_G2MS	NA
SMCO4	1	0	0	down	NA	1.53656e-07	0.107024	0.913069	0.806045	1	0.00845463	1.0604	1.05195	5_preB_G2MS	3_proB_G2MS	NA
PXDN	1	0	0	down	NA	3.34251e-16	0.106293	0.97783	0.871537	NA	-0.0257998	1.05263	1.07843	5_preB_G2MS	3_proB_G2MS	NA
CERS2	1	0	0	down	NA	5.02051e-07	0.105829	0.904317	0.798489	1	-0.000914634	1.03659	1.0375	5_preB_G2MS	3_proB_G2MS	NA
PPA1	1	0	0	down	NA	9.54075e-06	0.105601	0.605601	0.5	1	0.10845	1.55178	1.44332	5_preB_G2MS	3_proB_G2MS	NA
TGS1	1	0	0	down	NA	1.66092e-06	0.105403	0.893816	0.788413	1	0.0196886	1.04945	1.02976	5_preB_G2MS	3_proB_G2MS	NA
PDCD5	1	0	0	down	NA	0.000100433	0.105038	0.715869	0.610831	1	-0.00805407	1.13758	1.14563	5_preB_G2MS	3_proB_G2MS	NA
SUGT1	1	0	0	down	NA	0.000501316	0.104919	0.788798	0.683879	1	-0.0127446	1.08287	1.09562	5_preB_G2MS	3_proB_G2MS	NA
IRS2	1	0	0	down	NA	6.21949e-07	0.104727	0.894399	0.789673	1	-0.0465478	1.05525	1.1018	5_preB_G2MS	3_proB_G2MS	NA
CMSS1	1	0	0	down	NA	5.51112e-07	0.104707	0.862894	0.758186	1	0.0234929	1.12766	1.10417	5_preB_G2MS	3_proB_G2MS	NA
RGL4	1	0	0	down	NA	1.80837e-18	0.104571	0.983664	0.879093	NA	-1.1875	0	1.1875	5_preB_G2MS	3_proB_G2MS	NA
TM9SF3	1	0	0	down	NA	3.36782e-09	0.104255	0.924154	0.819899	1	-0.0160839	1.05385	1.06993	5_preB_G2MS	3_proB_G2MS	NA
ATP5G1	1	0	0	down	NA	5.09742e-06	0.104239	0.551342	0.447103	1	0.0564233	1.53706	1.48064	5_preB_G2MS	3_proB_G2MS	NA
RPN1	1	0	0	down	NA	7.36167e-05	0.103883	0.849475	0.745592	1	-0.010515	1.07364	1.08416	5_preB_G2MS	3_proB_G2MS	NA
CD96	1	0	0	down	NA	2.2394e-16	0.103839	0.969078	0.865239	1	0.000176336	1.01887	1.01869	5_preB_G2MS	3_proB_G2MS	NA
BMI1	1	0	0	down	NA	9.89195e-14	0.103654	0.971412	0.867758	NA	-0.0190476	1	1.01905	5_preB_G2MS	3_proB_G2MS	NA
RFTN1	1	0	0	down	NA	1.7537e-07	0.103551	0.917153	0.813602	1	-0.0106585	1.07042	1.08108	5_preB_G2MS	3_proB_G2MS	NA
SPG21	1	0	0	down	NA	5.19822e-05	0.103336	0.832555	0.729219	1	0.00108581	1.0662	1.06512	5_preB_G2MS	3_proB_G2MS	NA
DDOST	1	0	0	down	NA	9.77759e-05	0.103317	0.80105	0.697733	1	0.00464321	1.08798	1.08333	5_preB_G2MS	3_proB_G2MS	NA
YARS	1	0	0	down	NA	0.000186407	0.103244	0.833722	0.730479	1	0.0117888	1.09123	1.07944	5_preB_G2MS	3_proB_G2MS	NA
LDHA	1	0	0	down	NA	9.3949e-07	0.102991	0.186114	0.0831234	1.3681e-10	-0.580194	2.80717	3.38736	5_preB_G2MS	3_proB_G2MS	NA
ACSS1	1	0	0	down	NA	1.62509e-06	0.10292	0.87748	0.774559	1	0.0129024	1.11905	1.10615	5_preB_G2MS	3_proB_G2MS	NA
GAMT	1	0	0	down	NA	3.15192e-06	0.102865	0.86231	0.759446	1	-0.0316798	1.0678	1.09948	5_preB_G2MS	3_proB_G2MS	NA
CDK4	1	0	0	down	NA	0.000324348	0.102722	0.665694	0.562972	1	-0.0809532	1.22164	1.30259	5_preB_G2MS	3_proB_G2MS	NA
REEP5	1	0	0	down	NA	8.74579e-05	0.10266	0.833139	0.730479	1	-0.00254885	1.09091	1.09346	5_preB_G2MS	3_proB_G2MS	NA
NASP	1	0	0	down	NA	0.000102832	0.102584	0.207118	0.104534	0.234349	-0.231322	2.71523	2.94655	5_preB_G2MS	3_proB_G2MS	NA
CHID1	1	0	0	down	NA	3.65735e-09	0.102532	0.929988	0.827456	1	-0.0500608	1.00833	1.05839	5_preB_G2MS	3_proB_G2MS	NA
COX20	1	0	0	down	NA	1.22691e-05	0.102484	0.811552	0.709068	1	-0.033265	1.10526	1.13853	5_preB_G2MS	3_proB_G2MS	NA
TMX1	1	0	0	down	NA	0.000508896	0.102474	0.756126	0.653652	1	-0.0569378	1.08852	1.14545	5_preB_G2MS	3_proB_G2MS	NA
APOL3	1	0	0	down	NA	4.99061e-13	0.102366	0.963827	0.861461	NA	-0.0363636	1	1.03636	5_preB_G2MS	3_proB_G2MS	NA
YIPF4	1	0	0	down	NA	0.000100202	0.101975	0.857643	0.755668	1	0.0169427	1.09426	1.07732	5_preB_G2MS	3_proB_G2MS	NA
ST3GAL1	1	0	0	down	NA	8.81334e-13	0.101783	0.963244	0.861461	1	-0.0500722	1.03175	1.08182	5_preB_G2MS	3_proB_G2MS	NA
RP11-126K1.6	1	0	0	down	NA	3.03603e-09	0.101551	0.926488	0.824937	1	-0.0213543	1.07937	1.10072	5_preB_G2MS	3_proB_G2MS	NA
MESDC1	1	0	0	down	NA	2.98308e-05	0.101235	0.866978	0.765743	1	0.016412	1.07018	1.05376	5_preB_G2MS	3_proB_G2MS	NA
ATP1A1	1	0	0	down	NA	6.38334e-06	0.101142	0.868145	0.767003	1	-0.0127481	1.05752	1.07027	5_preB_G2MS	3_proB_G2MS	NA
GIMAP7	1	0	0	down	NA	8.73369e-17	0.10082	0.991249	0.890428	NA	-1.05747	0	1.05747	5_preB_G2MS	3_proB_G2MS	NA
STK32B	1	0	0	down	NA	4.53738e-17	0.10082	0.991249	0.890428	NA	-1.01149	0	1.01149	5_preB_G2MS	3_proB_G2MS	NA
UBE2D3	1	0	0	down	NA	7.35888e-06	0.100779	0.269545	0.168766	0.0659581	-0.17873	1.73642	1.91515	5_preB_G2MS	3_proB_G2MS	NA
PRCD	1	0	0	down	NA	8.50044e-14	0.100459	0.971995	0.871537	NA	-0.0294118	1	1.02941	5_preB_G2MS	3_proB_G2MS	NA
IGF2BP2	1	0	0	down	NA	1.69924e-13	0.100338	0.965578	0.865239	1	-0.00522731	1.05085	1.05607	5_preB_G2MS	3_proB_G2MS	NA
TP53I13	1	0	0	up	NA	2.4707e-10	-0.100243	0.691949	0.792191	0.79161	0.124242	1.16667	1.04242	5_preB_G2MS	3_proB_G2MS	NA
RASGEF1B	1	0	0	up	NA	5.01334e-13	-0.100481	0.837806	0.938287	NA	0.122302	1.1223	1	5_preB_G2MS	3_proB_G2MS	NA
PPM1K	1	0	0	up	NA	6.626e-11	-0.100556	0.791132	0.891688	1	0.143887	1.17877	1.03488	5_preB_G2MS	3_proB_G2MS	NA
RNPEP	1	0	0	up	NA	3.88805e-13	-0.100612	0.775963	0.876574	1	0.0707377	1.09115	1.02041	5_preB_G2MS	3_proB_G2MS	NA
APOBEC3C	1	0	0	up	NA	2.32091e-10	-0.101075	0.781797	0.882872	1	0.0822552	1.20053	1.11828	5_preB_G2MS	3_proB_G2MS	NA
LAMTOR4	1	0	0	up	NA	1.20572e-07	-0.101164	0.441657	0.542821	1	0.111523	1.38976	1.27824	5_preB_G2MS	3_proB_G2MS	NA
TSTD1	1	0	0	up	NA	2.76615e-07	-0.101236	0.553676	0.654912	0.0797479	0.158695	1.34118	1.18248	5_preB_G2MS	3_proB_G2MS	NA
TOPORS-AS1	1	0	0	up	NA	8.57605e-12	-0.101324	0.792882	0.894207	1	0.081053	1.09296	1.0119	5_preB_G2MS	3_proB_G2MS	NA
BCL2L11	1	0	0	up	NA	9.10248e-13	-0.101388	0.88098	0.982368	NA	1.05392	1.05392	0	5_preB_G2MS	3_proB_G2MS	NA
PHF19	1	0	0	up	NA	6.05614e-13	-0.101659	0.701867	0.803526	0.733802	0.124642	1.20157	1.07692	5_preB_G2MS	3_proB_G2MS	NA
C4orf3	1	0	0	up	NA	1.82383e-07	-0.101746	0.52042	0.622166	0.296001	0.128686	1.30535	1.17667	5_preB_G2MS	3_proB_G2MS	NA
TAPSAR1	1	0	0	up	NA	2.75578e-11	-0.102513	0.601517	0.70403	0.20267	0.13579	1.306	1.17021	5_preB_G2MS	3_proB_G2MS	NA
QARS	1	0	0	up	NA	1.8612e-07	-0.102746	0.564761	0.667506	0.254905	0.119374	1.22922	1.10985	5_preB_G2MS	3_proB_G2MS	NA
FMNL1	1	0	0	up	NA	2.59568e-10	-0.102973	0.766044	0.869018	1	0.042418	1.10973	1.06731	5_preB_G2MS	3_proB_G2MS	NA
VDAC1	1	1	0	up	up	8.34937e-17	-0.103829	0.0863477	0.190176	0	1.22984	3.40868	2.17885	5_preB_G2MS	3_proB_G2MS	NA
IFNGR2	1	0	0	up	NA	2.04226e-12	-0.10388	0.809218	0.913098	1	0.0925409	1.10703	1.01449	5_preB_G2MS	3_proB_G2MS	NA
HCLS1	1	0	0	up	NA	4.71749e-09	-0.10455	0.627188	0.731738	1	0.0985915	1.16432	1.06573	5_preB_G2MS	3_proB_G2MS	NA
GLO1	1	0	0	up	NA	5.52716e-08	-0.104574	0.357643	0.462217	0.00113317	0.241035	1.54314	1.30211	5_preB_G2MS	3_proB_G2MS	NA
UBLCP1	1	0	0	up	NA	5.43549e-15	-0.105047	0.808051	0.913098	1	0.0584556	1.07295	1.01449	5_preB_G2MS	3_proB_G2MS	NA
RNF144B	1	0	0	up	NA	3.91612e-10	-0.105814	0.889148	0.994962	NA	1.08421	1.08421	0	5_preB_G2MS	3_proB_G2MS	NA
PEX2	1	0	0	up	NA	2.57168e-14	-0.106158	0.822054	0.928212	1	0.0227783	1.07541	1.05263	5_preB_G2MS	3_proB_G2MS	NA
MS4A1	1	0	0	up	NA	1.22613e-10	-0.106195	0.83839	0.944584	1	-0.455284	1.47653	1.93182	5_preB_G2MS	3_proB_G2MS	NA
CAPN1	1	0	0	up	NA	1.66907e-11	-0.106253	0.664527	0.770781	1	0.0656856	1.14261	1.07692	5_preB_G2MS	3_proB_G2MS	NA
NREP	1	0	0	up	NA	8.80526e-10	-0.10632	0.593932	0.700252	1	0.101178	1.23563	1.13445	5_preB_G2MS	3_proB_G2MS	NA
SMIM19	1	0	0	up	NA	1.09417e-12	-0.107001	0.77713	0.884131	1	0.0302185	1.06283	1.03261	5_preB_G2MS	3_proB_G2MS	NA
LCP1	1	0	0	up	NA	1.4355e-07	-0.107098	0.540257	0.647355	0.364786	0.150961	1.36168	1.21071	5_preB_G2MS	3_proB_G2MS	NA
BEST3	1	0	0	up	NA	2.23785e-13	-0.107407	0.87748	0.984887	NA	1.16667	1.16667	0	5_preB_G2MS	3_proB_G2MS	NA
COMMD4	1	0	0	up	NA	1.08878e-11	-0.107457	0.679697	0.787154	1	0.0460439	1.15847	1.11243	5_preB_G2MS	3_proB_G2MS	NA
EIF2S3	1	0	0	up	NA	1.4757e-07	-0.107554	0.442824	0.550378	1	0.0926863	1.47644	1.38375	5_preB_G2MS	3_proB_G2MS	NA
LAMP5	1	0	0	up	NA	5.47719e-08	-0.108333	0.889148	0.997481	NA	1.21579	1.21579	0	5_preB_G2MS	3_proB_G2MS	NA
HINT2	1	0	0	up	NA	3.79966e-10	-0.108515	0.550175	0.65869	0.700864	0.132152	1.27237	1.14022	5_preB_G2MS	3_proB_G2MS	NA
BUB3	1	0	0	up	NA	3.6118e-13	-0.10853	0.256709	0.365239	0.00079026	0.286848	2.11224	1.8254	5_preB_G2MS	3_proB_G2MS	NA
MAPRE1	1	0	0	up	NA	1.29627e-09	-0.108628	0.44049	0.549118	1	0.0979256	1.34932	1.2514	5_preB_G2MS	3_proB_G2MS	NA
UBXN1	1	0	0	up	NA	4.11695e-08	-0.109306	0.361727	0.471033	0.000394014	0.2731	1.68739	1.41429	5_preB_G2MS	3_proB_G2MS	NA
MRPS21	1	0	0	up	NA	2.41443e-07	-0.11011	0.45916	0.56927	1	0.0562085	1.3603	1.30409	5_preB_G2MS	3_proB_G2MS	NA
IKZF2	1	0	0	up	NA	9.34618e-14	-0.110352	0.866978	0.97733	NA	1.09649	1.09649	0	5_preB_G2MS	3_proB_G2MS	NA
CDKN2A	1	0	0	up	NA	1.99354e-13	-0.11054	0.710618	0.821159	1	0.0949568	1.19355	1.09859	5_preB_G2MS	3_proB_G2MS	NA
ENDOV	1	0	0	up	NA	1.40953e-15	-0.110621	0.846558	0.957179	NA	0.0276225	1.05703	1.02941	5_preB_G2MS	3_proB_G2MS	NA
MED30	1	0	0	up	NA	1.68749e-08	-0.111065	0.383897	0.494962	5.97525e-08	0.272437	1.47443	1.202	5_preB_G2MS	3_proB_G2MS	NA
LBH	1	0	0	up	NA	2.17343e-14	-0.111131	0.813302	0.924433	1	0.0895833	1.10625	1.01667	5_preB_G2MS	3_proB_G2MS	NA
SYNE2	1	0	0	up	NA	6.57651e-15	-0.111282	0.640607	0.751889	0.0181963	0.287033	1.45455	1.16751	5_preB_G2MS	3_proB_G2MS	NA
EPC1	1	0	0	up	NA	4.736e-07	-0.111321	0.577596	0.688917	0.168523	0.15464	1.32873	1.17409	5_preB_G2MS	3_proB_G2MS	NA
GADD45B	1	0	0	up	NA	9.54201e-09	-0.111459	0.61902	0.730479	0.0410066	0.198015	1.35222	1.15421	5_preB_G2MS	3_proB_G2MS	NA
NUP210	1	0	0	up	NA	4.80216e-14	-0.112141	0.802217	0.914358	1	0.0384782	1.0826	1.04412	5_preB_G2MS	3_proB_G2MS	NA
CASC4	1	0	0	up	NA	1.68784e-13	-0.112252	0.771879	0.884131	NA	0.14578	1.14578	1	5_preB_G2MS	3_proB_G2MS	NA
IL7R	1	0	0	up	NA	5.02674e-12	-0.11228	0.764294	0.876574	1	0.0514245	1.15347	1.10204	5_preB_G2MS	3_proB_G2MS	NA
MDM4	1	0	0	up	NA	9.77007e-07	-0.112332	0.487165	0.599496	1	0.168684	1.719	1.55031	5_preB_G2MS	3_proB_G2MS	NA
HIST2H2AC	1	0	0	up	NA	1.69168e-11	-0.112968	0.630105	0.743073	1	0.160821	1.43533	1.27451	5_preB_G2MS	3_proB_G2MS	NA
ASXL1	1	0	0	up	NA	1.83776e-13	-0.113021	0.773629	0.88665	1	0.110023	1.12113	1.01111	5_preB_G2MS	3_proB_G2MS	NA
ACTR2	1	0	0	up	NA	8.49501e-10	-0.113147	0.449825	0.562972	1	0.143368	1.4719	1.32853	5_preB_G2MS	3_proB_G2MS	NA
CD55	1	0	0	up	NA	9.48197e-14	-0.11365	0.813302	0.926952	1	0.0733836	1.09062	1.01724	5_preB_G2MS	3_proB_G2MS	NA
DDX54	1	0	0	up	NA	1.55682e-10	-0.113847	0.680863	0.79471	1	0.0922152	1.15356	1.06135	5_preB_G2MS	3_proB_G2MS	NA
FBXO25	1	0	0	up	NA	7.23157e-14	-0.113938	0.761377	0.875315	NA	0.127139	1.12714	1	5_preB_G2MS	3_proB_G2MS	NA
REPIN1	1	0	0	up	NA	2.12457e-10	-0.114189	0.693116	0.807305	1	0.0926713	1.1711	1.07843	5_preB_G2MS	3_proB_G2MS	NA
BZW1	1	0	0	up	NA	4.95636e-10	-0.114261	0.305134	0.419395	0.000248609	0.246057	1.5953	1.34924	5_preB_G2MS	3_proB_G2MS	NA
MIS18BP1	1	0	0	up	NA	1.0238e-11	-0.114436	0.362894	0.47733	1.8798e-07	0.343391	1.68315	1.33976	5_preB_G2MS	3_proB_G2MS	NA
QPRT	1	0	0	up	NA	4.17304e-15	-0.114946	0.829638	0.944584	1	0.0722291	1.14041	1.06818	5_preB_G2MS	3_proB_G2MS	NA
SERHL2	1	0	0	up	NA	2.20395e-14	-0.114965	0.798133	0.913098	1	0.0778252	1.15029	1.07246	5_preB_G2MS	3_proB_G2MS	NA
IGBP1	1	0	0	up	NA	2.32091e-10	-0.115209	0.626604	0.741814	0.595572	0.123933	1.23125	1.10732	5_preB_G2MS	3_proB_G2MS	NA
BPTF	1	0	0	up	NA	1.3838e-11	-0.115347	0.668028	0.783375	1	0.112325	1.24605	1.13372	5_preB_G2MS	3_proB_G2MS	NA
EIF1B	1	0	0	up	NA	2.72839e-10	-0.115435	0.407235	0.52267	0.00285915	0.244567	1.52953	1.28496	5_preB_G2MS	3_proB_G2MS	NA
CENPF	1	0	0	up	NA	9.99679e-13	-0.115704	0.386814	0.502519	0.0673927	0.257264	2.7079	2.45063	5_preB_G2MS	3_proB_G2MS	NA
DRAM2	1	0	0	up	NA	1.74046e-12	-0.116383	0.728705	0.845088	1	0.0957776	1.15269	1.05691	5_preB_G2MS	3_proB_G2MS	NA
NTAN1	1	0	0	up	NA	4.33256e-12	-0.116579	0.675613	0.792191	1	0.124918	1.21583	1.09091	5_preB_G2MS	3_proB_G2MS	NA
ARPC1B	1	0	0	up	NA	1.3143e-08	-0.116655	0.549592	0.666247	1	0.0919005	1.30699	1.21509	5_preB_G2MS	3_proB_G2MS	NA
ARPP21	1	0	0	up	NA	1.84551e-11	-0.117441	0.599183	0.716625	1	0.0470257	1.43814	1.39111	5_preB_G2MS	3_proB_G2MS	NA
POU2AF1	1	0	0	up	NA	4.07616e-12	-0.118147	0.512835	0.630982	0.0266721	0.193244	1.36048	1.16724	5_preB_G2MS	3_proB_G2MS	NA
LGALS9	1	0	0	up	NA	5.15678e-10	-0.118636	0.590432	0.709068	1	0.115792	1.30627	1.19048	5_preB_G2MS	3_proB_G2MS	NA
TADA3	1	0	0	up	NA	7.61352e-17	-0.119364	0.813886	0.933249	NA	0.0721003	1.0721	1	5_preB_G2MS	3_proB_G2MS	NA
MIR181A1HG	1	0	0	up	NA	1.98189e-09	-0.119423	0.640023	0.759446	0.228642	0.185164	1.38412	1.19895	5_preB_G2MS	3_proB_G2MS	NA
TATDN1	1	0	0	up	NA	5.19695e-13	-0.119624	0.769545	0.889169	1	0.0785386	1.10127	1.02273	5_preB_G2MS	3_proB_G2MS	NA
PPP2R5C	1	0	0	up	NA	4.92929e-10	-0.120775	0.64119	0.761965	1	0.110001	1.24228	1.13228	5_preB_G2MS	3_proB_G2MS	NA
OGFRL1	1	0	0	up	NA	1.08385e-14	-0.121717	0.780047	0.901763	1	0.0583554	1.13528	1.07692	5_preB_G2MS	3_proB_G2MS	NA
FAM207A	1	0	0	up	NA	4.71356e-16	-0.122466	0.813302	0.935768	1	0.0522672	1.07187	1.01961	5_preB_G2MS	3_proB_G2MS	NA
LYRM1	1	0	0	up	NA	9.94665e-15	-0.122903	0.747375	0.870277	1	0.0724904	1.10162	1.02913	5_preB_G2MS	3_proB_G2MS	NA
OSTF1	1	0	0	up	NA	4.4368e-13	-0.122997	0.669195	0.792191	1	0.0724387	1.12698	1.05455	5_preB_G2MS	3_proB_G2MS	NA
MID1IP1	1	0	0	up	NA	6.3805e-11	-0.123304	0.585764	0.709068	0.00011256	0.271063	1.36197	1.09091	5_preB_G2MS	3_proB_G2MS	NA
TCL1B	1	0	0	up	NA	4.08278e-16	-0.123521	0.842474	0.965995	NA	1.91481	1.91481	0	5_preB_G2MS	3_proB_G2MS	NA
UBE2F	1	0	0	up	NA	8.77446e-17	-0.12441	0.837806	0.962217	NA	1.18345	1.18345	0	5_preB_G2MS	3_proB_G2MS	NA
WIBG	1	0	0	up	NA	1.24992e-13	-0.125533	0.717036	0.842569	1	0.0470928	1.10309	1.056	5_preB_G2MS	3_proB_G2MS	NA
NDUFS5	1	0	0	up	NA	1.48004e-07	-0.125705	0.433489	0.559194	1	0.192305	1.60659	1.41429	5_preB_G2MS	3_proB_G2MS	NA
YPEL3	1	0	0	up	NA	2.20341e-15	-0.126347	0.759043	0.88539	1	0.0808344	1.1138	1.03297	5_preB_G2MS	3_proB_G2MS	NA
MSL3	1	0	0	up	NA	4.61613e-16	-0.126718	0.763711	0.890428	1	0.0848872	1.13086	1.04598	5_preB_G2MS	3_proB_G2MS	NA
PTPN2	1	0	0	up	NA	2.28644e-12	-0.128386	0.705368	0.833753	1	0.115287	1.16832	1.05303	5_preB_G2MS	3_proB_G2MS	NA
DTX1	1	0	0	up	NA	1.43554e-17	-0.128921	0.823221	0.952141	NA	0.118812	1.11881	1	5_preB_G2MS	3_proB_G2MS	NA
PTPN7	1	0	0	up	NA	7.93986e-16	-0.129087	0.85706	0.986146	NA	1.12653	1.12653	0	5_preB_G2MS	3_proB_G2MS	NA
ZEB2	1	0	0	up	NA	5.61108e-11	-0.129156	0.627771	0.756927	1	0.166964	1.32759	1.16062	5_preB_G2MS	3_proB_G2MS	NA
C1orf63	1	0	0	up	NA	8.02333e-13	-0.129895	0.716453	0.846348	1	0.123828	1.21399	1.09016	5_preB_G2MS	3_proB_G2MS	NA
CCNL1	1	0	0	up	NA	4.56453e-10	-0.130539	0.46266	0.593199	0.0705917	0.213703	1.50163	1.28793	5_preB_G2MS	3_proB_G2MS	NA
RTKN2	1	0	0	up	NA	4.03371e-19	-0.131661	0.84189	0.973552	NA	1.11439	1.11439	0	5_preB_G2MS	3_proB_G2MS	NA
FAM65B	1	0	0	up	NA	1.01678e-15	-0.131755	0.763711	0.895466	1	0.127116	1.17531	1.04819	5_preB_G2MS	3_proB_G2MS	NA
NPC2	1	0	0	up	NA	4.81915e-11	-0.13213	0.530338	0.662469	0.00454174	0.232103	1.38882	1.15672	5_preB_G2MS	3_proB_G2MS	NA
ZNF101	1	0	0	up	NA	3.18964e-18	-0.132477	0.804551	0.937028	1	0.0576119	1.07761	1.02	5_preB_G2MS	3_proB_G2MS	NA
DCAF12	1	0	0	up	NA	1.71875e-19	-0.132514	0.820887	0.953401	NA	0.127036	1.12704	1	5_preB_G2MS	3_proB_G2MS	NA
EVI2B	1	0	0	up	NA	6.32878e-12	-0.132719	0.712369	0.845088	0.20789	0.386913	1.63895	1.25203	5_preB_G2MS	3_proB_G2MS	NA
ADARB1	1	0	0	up	NA	2.2741e-09	-0.132837	0.864644	0.997481	NA	1.09052	1.09052	0	5_preB_G2MS	3_proB_G2MS	NA
BTG2	1	0	0	up	NA	1.88542e-12	-0.132871	0.539673	0.672544	0.230705	0.175592	1.44867	1.27308	5_preB_G2MS	3_proB_G2MS	NA
HIST1H2AM	1	0	0	up	NA	1.71959e-15	-0.133082	0.613769	0.746851	0.0101078	0.288565	1.5423	1.25373	5_preB_G2MS	3_proB_G2MS	NA
GLUL	1	0	0	up	NA	6.28628e-13	-0.133437	0.491249	0.624685	0.00339147	0.196678	1.40138	1.2047	5_preB_G2MS	3_proB_G2MS	NA
VOPP1	1	0	0	up	NA	2.63798e-17	-0.134681	0.784714	0.919395	NA	0.113821	1.11382	1	5_preB_G2MS	3_proB_G2MS	NA
TBC1D1	1	0	0	up	NA	2.24678e-15	-0.134831	0.691365	0.826196	1	0.0765595	1.14178	1.06522	5_preB_G2MS	3_proB_G2MS	NA
KRT10	1	0	0	up	NA	4.09763e-11	-0.134865	0.366394	0.501259	1.3624e-05	0.283707	1.56906	1.28535	5_preB_G2MS	3_proB_G2MS	NA
FAIM	1	0	0	up	NA	2.8785e-15	-0.135018	0.614352	0.74937	1	0.109298	1.21483	1.10553	5_preB_G2MS	3_proB_G2MS	NA
C12orf75	1	0	0	up	NA	1.06991e-15	-0.135061	0.313302	0.448363	1.2793e-09	0.395796	1.70858	1.31279	5_preB_G2MS	3_proB_G2MS	NA
CHCHD7	1	0	0	up	NA	3.17282e-14	-0.135369	0.650525	0.785894	0.526272	0.128312	1.16361	1.03529	5_preB_G2MS	3_proB_G2MS	NA
NDUFB9	1	0	0	up	NA	4.79225e-10	-0.135578	0.383314	0.518892	0.0149608	0.195421	1.49385	1.29843	5_preB_G2MS	3_proB_G2MS	NA
RRBP1	1	0	0	up	NA	8.64783e-19	-0.135801	0.822637	0.958438	NA	0.121013	1.15132	1.0303	5_preB_G2MS	3_proB_G2MS	NA
HADHA	1	0	0	up	NA	4.59404e-12	-0.135928	0.498833	0.634761	0.310178	0.121039	1.30035	1.17931	5_preB_G2MS	3_proB_G2MS	NA
HIP1	1	0	0	up	NA	8.45834e-20	-0.138135	0.820303	0.958438	NA	0.13961	1.13961	1	5_preB_G2MS	3_proB_G2MS	NA
RAC2	1	0	0	up	NA	2.98309e-15	-0.138272	0.441074	0.579345	0.00557524	0.286775	1.66701	1.38024	5_preB_G2MS	3_proB_G2MS	NA
C19orf77	1	0	0	up	NA	2.23963e-17	-0.13869	0.827305	0.965995	NA	1.15203	1.15203	0	5_preB_G2MS	3_proB_G2MS	NA
CYB5R4	1	0	0	up	NA	3.5112e-16	-0.140248	0.719953	0.860202	1	0.109065	1.12708	1.01802	5_preB_G2MS	3_proB_G2MS	NA
ORC6	1	0	0	up	NA	8.50054e-16	-0.141048	0.555426	0.696474	0.00582469	0.184517	1.27165	1.08714	5_preB_G2MS	3_proB_G2MS	NA
HMGB3	1	0	0	up	NA	3.58384e-19	-0.141192	0.279463	0.420655	0.000102709	0.301787	2.017	1.71522	5_preB_G2MS	3_proB_G2MS	NA
PLGRKT	1	0	0	up	NA	6.04834e-17	-0.141303	0.749125	0.890428	1	0.0563486	1.10233	1.04598	5_preB_G2MS	3_proB_G2MS	NA
CD48	1	0	0	up	NA	1.07517e-16	-0.141321	0.796966	0.938287	1	0.0709594	1.13218	1.06122	5_preB_G2MS	3_proB_G2MS	NA
BRK1	1	0	0	up	NA	7.60021e-14	-0.1417	0.325554	0.467254	0.00244065	0.22376	1.55709	1.33333	5_preB_G2MS	3_proB_G2MS	NA
MKNK2	1	0	0	up	NA	1.39542e-15	-0.14222	0.736873	0.879093	1	0.13283	1.16408	1.03125	5_preB_G2MS	3_proB_G2MS	NA
TMEM243	1	0	0	up	NA	9.61085e-15	-0.142727	0.36231	0.505038	0.394863	0.129329	1.52882	1.39949	5_preB_G2MS	3_proB_G2MS	NA
HRK	1	0	0	up	NA	8.89302e-18	-0.143646	0.770712	0.914358	1	0.119294	1.17812	1.05882	5_preB_G2MS	3_proB_G2MS	NA
CD79A	1	0	0	up	NA	7.56129e-24	-0.143946	0.084014	0.22796	6.87676e-08	0.616695	3.49108	2.87439	5_preB_G2MS	3_proB_G2MS	NA
YWHAZ	1	0	0	up	NA	9.3875e-17	-0.144175	0.205951	0.350126	8.00686e-11	0.490739	2.08376	1.59302	5_preB_G2MS	3_proB_G2MS	NA
BACH2	1	0	0	up	NA	1.22661e-15	-0.144631	0.608518	0.753149	0.0946736	0.189361	1.39344	1.20408	5_preB_G2MS	3_proB_G2MS	NA
PTTG1	1	0	0	up	NA	2.30575e-17	-0.144998	0.271879	0.416877	0.403252	-0.151228	2.92869	3.07991	5_preB_G2MS	3_proB_G2MS	NA
TMX4	1	0	0	up	NA	1.30642e-17	-0.145333	0.680863	0.826196	1	0.0903744	1.17733	1.08696	5_preB_G2MS	3_proB_G2MS	NA
MRPS36	1	0	0	up	NA	3.39704e-17	-0.145981	0.689032	0.835013	1	0.104163	1.1576	1.05344	5_preB_G2MS	3_proB_G2MS	NA
ANXA5	1	0	0	up	NA	2.20378e-17	-0.146019	0.626021	0.77204	1	0.133846	1.22777	1.09392	5_preB_G2MS	3_proB_G2MS	NA
MPZL1	1	0	0	up	NA	9.7499e-19	-0.146341	0.749125	0.895466	1	0.0463155	1.1186	1.07229	5_preB_G2MS	3_proB_G2MS	NA
USP16	1	0	0	up	NA	1.33321e-14	-0.146566	0.609102	0.755668	1	0.0674719	1.20149	1.13402	5_preB_G2MS	3_proB_G2MS	NA
FAM173A	1	0	0	up	NA	6.79917e-19	-0.147293	0.832555	0.979849	NA	1.06969	1.06969	0	5_preB_G2MS	3_proB_G2MS	NA
H1FX	1	0	0	up	NA	1.65408e-16	-0.147405	0.302217	0.449622	4.90165e-13	0.627794	2.16555	1.53776	5_preB_G2MS	3_proB_G2MS	NA
PPP1R2	1	0	0	up	NA	3.58578e-14	-0.149039	0.568845	0.717884	0.661646	0.167692	1.28823	1.12054	5_preB_G2MS	3_proB_G2MS	NA
APLP2	1	0	0	up	NA	8.96133e-17	-0.149601	0.75846	0.90806	1	0.14731	1.18841	1.0411	5_preB_G2MS	3_proB_G2MS	NA
LRMP	1	0	0	up	NA	2.63916e-18	-0.149629	0.750875	0.900504	1	0.0715916	1.14754	1.07595	5_preB_G2MS	3_proB_G2MS	NA
PIM2	1	0	0	up	NA	2.35167e-20	-0.149989	0.810968	0.960957	NA	0.12963	1.12963	1	5_preB_G2MS	3_proB_G2MS	NA
TOP1	1	0	0	up	NA	3.09171e-14	-0.150208	0.488331	0.638539	0.036612	0.181606	1.35234	1.17073	5_preB_G2MS	3_proB_G2MS	NA
STX7	1	0	0	up	NA	2.68448e-19	-0.153241	0.717036	0.870277	1	0.136423	1.17526	1.03883	5_preB_G2MS	3_proB_G2MS	NA
MYL4	1	0	0	up	NA	2.10491e-14	-0.153563	0.84014	0.993703	NA	1.15328	1.15328	0	5_preB_G2MS	3_proB_G2MS	NA
RP11-164H13.1	1	0	0	up	NA	1.25961e-11	-0.154331	0.84189	0.996222	NA	1.4059	1.4059	0	5_preB_G2MS	3_proB_G2MS	NA
MRPS6	1	0	0	up	NA	6.86103e-18	-0.154903	0.476079	0.630982	0.286216	0.140722	1.33185	1.19113	5_preB_G2MS	3_proB_G2MS	NA
ASRGL1	1	0	0	up	NA	5.68239e-22	-0.155528	0.753792	0.90932	1	0.149947	1.17773	1.02778	5_preB_G2MS	3_proB_G2MS	NA
UBE2E3	1	0	0	up	NA	1.38708e-17	-0.156627	0.402567	0.559194	0.135312	0.186434	1.45215	1.26571	5_preB_G2MS	3_proB_G2MS	NA
MARCKS	1	0	0	up	NA	4.67169e-22	-0.156916	0.771295	0.928212	1	0.116362	1.20408	1.08772	5_preB_G2MS	3_proB_G2MS	NA
SNX29P2	1	0	0	up	NA	6.212e-20	-0.157212	0.822637	0.979849	NA	1.13158	1.13158	0	5_preB_G2MS	3_proB_G2MS	NA
MRPS34	1	0	0	up	NA	2.03338e-15	-0.158818	0.596849	0.755668	1	0.119497	1.19682	1.07732	5_preB_G2MS	3_proB_G2MS	NA
GLRX5	1	0	0	up	NA	5.39975e-15	-0.159681	0.52042	0.680101	0.0509527	0.178152	1.30414	1.12598	5_preB_G2MS	3_proB_G2MS	NA
SEPT6	1	0	0	up	NA	5.6225e-17	-0.160239	0.368728	0.528967	1.02671e-05	0.262161	1.5536	1.29144	5_preB_G2MS	3_proB_G2MS	NA
TMSB15A	1	0	0	up	NA	8.80073e-23	-0.161121	0.760793	0.921914	1	0.24941	1.42683	1.17742	5_preB_G2MS	3_proB_G2MS	NA
FAM107B	1	0	0	up	NA	1.18523e-18	-0.161328	0.572929	0.734257	0.0381988	0.161014	1.29372	1.1327	5_preB_G2MS	3_proB_G2MS	NA
RANGRF	1	0	0	up	NA	2.52887e-21	-0.161715	0.704784	0.866499	1	0.0911701	1.13834	1.04717	5_preB_G2MS	3_proB_G2MS	NA
DAAM1	1	0	0	up	NA	2.28463e-24	-0.161806	0.785298	0.947103	1	0.135093	1.20652	1.07143	5_preB_G2MS	3_proB_G2MS	NA
HSH2D	1	0	0	up	NA	5.48829e-21	-0.163046	0.816803	0.979849	NA	1.11146	1.11146	0	5_preB_G2MS	3_proB_G2MS	NA
TIFA	1	0	0	up	NA	8.55236e-18	-0.163866	0.541424	0.70529	0.000541939	0.257519	1.46692	1.2094	5_preB_G2MS	3_proB_G2MS	NA
TPI1	1	0	0	up	NA	1.38463e-17	-0.164313	0.42007	0.584383	0.159112	0.1863	1.64085	1.45455	5_preB_G2MS	3_proB_G2MS	NA
TAX1BP3	1	0	0	up	NA	6.21782e-20	-0.16478	0.687865	0.852645	0.282286	0.185574	1.21121	1.02564	5_preB_G2MS	3_proB_G2MS	NA
ODC1	1	0	0	up	NA	7.31068e-16	-0.166204	0.30105	0.467254	0	0.536876	1.89149	1.35461	5_preB_G2MS	3_proB_G2MS	NA
HIST1H1E	1	0	0	up	NA	7.85822e-19	-0.166719	0.529755	0.696474	0.276138	0.276325	1.88213	1.60581	5_preB_G2MS	3_proB_G2MS	NA
DDAH2	1	0	0	up	NA	2.71918e-20	-0.166841	0.443991	0.610831	0.146911	0.19208	1.65163	1.45955	5_preB_G2MS	3_proB_G2MS	NA
MIR142	1	0	0	up	NA	2.85626e-16	-0.16856	0.608518	0.777078	0.0250006	0.324871	1.56781	1.24294	5_preB_G2MS	3_proB_G2MS	NA
POU2F2	1	0	0	up	NA	1.16304e-23	-0.169677	0.805134	0.974811	NA	1.13772	1.13772	0	5_preB_G2MS	3_proB_G2MS	NA
STRBP	1	0	0	up	NA	5.47283e-19	-0.172099	0.542007	0.714106	0.000677357	0.226224	1.2879	1.06167	5_preB_G2MS	3_proB_G2MS	NA
GRN	1	0	0	up	NA	1.01236e-24	-0.172252	0.789965	0.962217	NA	1.10556	1.10556	0	5_preB_G2MS	3_proB_G2MS	NA
OCIAD2	1	0	0	up	NA	2.73919e-18	-0.173745	0.673862	0.847607	1	0.0166768	1.13238	1.1157	5_preB_G2MS	3_proB_G2MS	NA
KLF2	1	0	0	up	NA	1.55943e-23	-0.174947	0.768378	0.943325	1	0.147887	1.23678	1.08889	5_preB_G2MS	3_proB_G2MS	NA
P4HA2	1	0	0	up	NA	1.71274e-28	-0.175188	0.755543	0.93073	1	0.0460404	1.15513	1.10909	5_preB_G2MS	3_proB_G2MS	NA
MAP2K3	1	0	0	up	NA	7.13479e-20	-0.176478	0.589265	0.765743	0.886863	0.116294	1.21307	1.09677	5_preB_G2MS	3_proB_G2MS	NA
SYK	1	0	0	up	NA	3.37771e-22	-0.178885	0.619603	0.798489	0.139668	0.185621	1.26687	1.08125	5_preB_G2MS	3_proB_G2MS	NA
HCK	1	0	0	up	NA	1.31832e-10	-0.179511	0.81797	0.997481	NA	1.28205	1.28205	0	5_preB_G2MS	3_proB_G2MS	NA
TERF1	1	0	0	up	NA	7.09941e-24	-0.181127	0.616103	0.797229	0.0012869	0.267675	1.32979	1.06211	5_preB_G2MS	3_proB_G2MS	NA
SSR2	1	0	0	up	NA	1.38118e-17	-0.182539	0.364061	0.546599	2.05229e-11	0.348191	1.59541	1.24722	5_preB_G2MS	3_proB_G2MS	NA
CCNDBP1	1	0	0	up	NA	4.07097e-22	-0.182636	0.627188	0.809824	0.148723	0.170082	1.23631	1.06623	5_preB_G2MS	3_proB_G2MS	NA
N4BP3	1	0	0	up	NA	7.69818e-13	-0.183503	0.812719	0.996222	NA	1.12461	1.12461	0	5_preB_G2MS	3_proB_G2MS	NA
EZR	1	0	0	up	NA	3.76376e-24	-0.183587	0.289965	0.473552	4.18923e-06	0.321423	1.78554	1.46411	5_preB_G2MS	3_proB_G2MS	NA
ID2	1	0	0	up	NA	1.75076e-19	-0.185647	0.546091	0.731738	0.0275026	0.439377	1.82905	1.38967	5_preB_G2MS	3_proB_G2MS	NA
ANXA2	1	0	0	up	NA	7.51236e-25	-0.186255	0.696616	0.882872	0.103545	0.282423	1.35769	1.07527	5_preB_G2MS	3_proB_G2MS	NA
ITGAE	1	0	0	up	NA	2.68405e-20	-0.187112	0.437573	0.624685	6.23757e-08	0.323547	1.46784	1.1443	5_preB_G2MS	3_proB_G2MS	NA
SPINT2	1	0	0	up	NA	2.64722e-21	-0.188823	0.57818	0.767003	0.000505374	0.287339	1.39004	1.1027	5_preB_G2MS	3_proB_G2MS	NA
ZFP36	1	0	0	up	NA	2.50963e-23	-0.189136	0.677363	0.866499	1	0.0997816	1.22242	1.12264	5_preB_G2MS	3_proB_G2MS	NA
SPI1	1	0	0	up	NA	7.32099e-25	-0.190739	0.610268	0.801008	1	0.135128	1.21108	1.07595	5_preB_G2MS	3_proB_G2MS	NA
BIK	1	0	0	up	NA	2.85819e-17	-0.191486	0.802217	0.993703	NA	1.10324	1.10324	0	5_preB_G2MS	3_proB_G2MS	NA
CDC40	1	0	0	up	NA	1.61513e-24	-0.191924	0.656943	0.848866	0.541892	0.161565	1.2449	1.08333	5_preB_G2MS	3_proB_G2MS	NA
CD9	1	0	0	up	NA	9.57823e-23	-0.19193	0.339557	0.531486	1	0.183518	2.69965	2.51613	5_preB_G2MS	3_proB_G2MS	NA
MYL12B	1	0	0	up	NA	3.27812e-35	-0.19273	0.0956826	0.288413	0	0.875792	2.60323	1.72743	5_preB_G2MS	3_proB_G2MS	NA
EIF4A3	1	0	0	up	NA	1.64919e-27	-0.192745	0.302217	0.494962	0	0.583837	1.90803	1.32419	5_preB_G2MS	3_proB_G2MS	NA
KIAA0922	1	0	0	up	NA	6.90697e-30	-0.192867	0.716453	0.90932	1	0.111111	1.16667	1.05556	5_preB_G2MS	3_proB_G2MS	NA
HLA-DMB	1	0	0	up	NA	7.51236e-25	-0.194795	0.613769	0.808564	1	0.104846	1.28248	1.17763	5_preB_G2MS	3_proB_G2MS	NA
BTK	1	0	0	up	NA	6.10446e-26	-0.195304	0.65986	0.855164	1	0.123544	1.24528	1.12174	5_preB_G2MS	3_proB_G2MS	NA
SYVN1	1	0	0	up	NA	8.0717e-27	-0.196479	0.682614	0.879093	1	0.0919118	1.15441	1.0625	5_preB_G2MS	3_proB_G2MS	NA
LSP1	1	0	0	up	NA	8.11783e-25	-0.196719	0.749125	0.945844	0.33087	0.323256	1.39302	1.06977	5_preB_G2MS	3_proB_G2MS	NA
P2RX5	1	0	0	up	NA	1.05075e-27	-0.197858	0.755543	0.953401	NA	0.259434	1.36754	1.10811	5_preB_G2MS	3_proB_G2MS	NA
AP1S2	1	0	0	up	NA	5.76199e-27	-0.198058	0.464411	0.662469	0.000254013	0.30319	1.51961	1.21642	5_preB_G2MS	3_proB_G2MS	NA
BLK	1	0	0	up	NA	3.70867e-29	-0.199072	0.715286	0.914358	1	0.138621	1.16803	1.02941	5_preB_G2MS	3_proB_G2MS	NA
CBX1	1	0	0	up	NA	1.57159e-26	-0.202946	0.55776	0.760705	0.133225	0.162491	1.2467	1.08421	5_preB_G2MS	3_proB_G2MS	NA
SEPW1	1	0	0	up	NA	5.60548e-28	-0.206314	0.695449	0.901763	1	0.116121	1.14176	1.02564	5_preB_G2MS	3_proB_G2MS	NA
MDH2	1	0	0	up	NA	4.90069e-22	-0.207059	0.466744	0.673804	0.0077601	0.185244	1.34354	1.1583	5_preB_G2MS	3_proB_G2MS	NA
S100A10	1	0	0	up	NA	4.21894e-29	-0.207666	0.696616	0.904282	1	0.166498	1.29808	1.13158	5_preB_G2MS	3_proB_G2MS	NA
CD81	1	0	0	up	NA	6.54674e-27	-0.208122	0.599183	0.807305	1	0.145075	1.25619	1.11111	5_preB_G2MS	3_proB_G2MS	NA
AES	1	0	0	up	NA	1.41529e-24	-0.209672	0.388565	0.598237	5.55659e-12	0.429422	1.6708	1.24138	5_preB_G2MS	3_proB_G2MS	NA
PIM1	1	0	0	up	NA	9.87272e-27	-0.210244	0.522754	0.732997	4.23966e-09	0.364442	1.46822	1.10377	5_preB_G2MS	3_proB_G2MS	NA
MYL12A	1	0	0	up	NA	3.01097e-36	-0.210714	0.131855	0.342569	0	0.993426	2.76546	1.77203	5_preB_G2MS	3_proB_G2MS	NA
MPST	1	0	0	up	NA	7.15131e-26	-0.210873	0.562427	0.7733	0.194437	0.158667	1.25867	1.1	5_preB_G2MS	3_proB_G2MS	NA
CAMK4	1	0	0	up	NA	6.5397e-14	-0.210924	0.785298	0.996222	NA	1.09783	1.09783	0	5_preB_G2MS	3_proB_G2MS	NA
CXXC5	1	0	0	up	NA	8.11783e-25	-0.212244	0.532089	0.744332	0.00645403	0.216307	1.36409	1.14778	5_preB_G2MS	3_proB_G2MS	NA
PLEKHA2	1	0	0	up	NA	1.28911e-31	-0.216592	0.745624	0.962217	NA	1.1422	1.1422	0	5_preB_G2MS	3_proB_G2MS	NA
RGS19	1	0	0	up	NA	7.92845e-30	-0.217458	0.510502	0.72796	0.00136637	0.282954	1.45888	1.17593	5_preB_G2MS	3_proB_G2MS	NA
LY86	1	0	0	up	NA	6.53916e-30	-0.217825	0.673862	0.891688	0.0963182	0.242397	1.30054	1.05814	5_preB_G2MS	3_proB_G2MS	NA
PTPRC	1	0	0	up	NA	2.36019e-30	-0.219474	0.647025	0.866499	1	0.141619	1.29256	1.15094	5_preB_G2MS	3_proB_G2MS	NA
PCGF5	1	0	0	up	NA	5.16164e-26	-0.219994	0.558343	0.778338	0.00613983	0.266955	1.34082	1.07386	5_preB_G2MS	3_proB_G2MS	NA
NARF	1	0	0	up	NA	5.37854e-29	-0.220875	0.529755	0.75063	0.00249173	0.222009	1.29777	1.07576	5_preB_G2MS	3_proB_G2MS	NA
APOBEC3B	1	0	0	up	NA	1.87056e-38	-0.22402	0.728121	0.952141	NA	0.188276	1.21459	1.02632	5_preB_G2MS	3_proB_G2MS	NA
JUNB	1	0	0	up	NA	1.60982e-26	-0.224217	0.595683	0.819899	0.836588	0.194028	1.66955	1.47552	5_preB_G2MS	3_proB_G2MS	NA
CORO1A	1	0	0	up	NA	1.50135e-40	-0.224383	0.129522	0.353904	3.51916e-12	0.522179	2.52413	2.00195	5_preB_G2MS	3_proB_G2MS	NA
GLTSCR2	1	1	0	up	up	1.96571e-44	-0.225514	0.0326721	0.258186	0	1.4868	3.54282	2.05603	5_preB_G2MS	3_proB_G2MS	NA
CTNNBL1	1	0	0	up	NA	3.83297e-30	-0.225682	0.487165	0.712846	1.51583e-05	0.27928	1.41524	1.13596	5_preB_G2MS	3_proB_G2MS	NA
PPP1R14A	1	0	0	up	NA	1.90278e-16	-0.227168	0.767795	0.994962	NA	1.40452	1.40452	0	5_preB_G2MS	3_proB_G2MS	NA
CD38	1	0	0	up	NA	1.1418e-32	-0.228433	0.450408	0.678841	0.0106341	0.224216	1.43206	1.20784	5_preB_G2MS	3_proB_G2MS	NA
APBB2	1	0	0	up	NA	1.25664e-08	-0.229779	0.768961	0.998741	NA	1.17677	1.17677	0	5_preB_G2MS	3_proB_G2MS	NA
TCF3	1	0	0	up	NA	4.13453e-31	-0.230812	0.488331	0.719144	0.0240752	0.17722	1.33865	1.16143	5_preB_G2MS	3_proB_G2MS	NA
MAGEF1	1	0	0	up	NA	2.12143e-35	-0.231299	0.724621	0.955919	NA	0.065678	1.06568	1	5_preB_G2MS	3_proB_G2MS	NA
UCP2	1	0	0	up	NA	7.99328e-36	-0.23302	0.309802	0.542821	2.0806e-11	0.535681	1.93238	1.39669	5_preB_G2MS	3_proB_G2MS	NA
LIMD2	1	0	0	up	NA	3.4285e-26	-0.23397	0.472579	0.706549	0.00179667	0.3213	1.69469	1.37339	5_preB_G2MS	3_proB_G2MS	NA
CCDC112	1	0	0	up	NA	8.82399e-34	-0.235133	0.709452	0.944584	0.296889	0.354783	1.37751	1.02273	5_preB_G2MS	3_proB_G2MS	NA
SOX4	1	1	0	up	up	4.51916e-36	-0.238885	0.13769	0.376574	1.68339e-14	1.34929	3.6705	2.32121	5_preB_G2MS	3_proB_G2MS	NA
WASF1	1	0	0	up	NA	1.80298e-36	-0.239505	0.653442	0.892947	0.134346	0.244147	1.26768	1.02353	5_preB_G2MS	3_proB_G2MS	NA
CHP1	1	0	0	up	NA	5.91101e-35	-0.239819	0.673279	0.913098	0.028478	0.298007	1.3125	1.01449	5_preB_G2MS	3_proB_G2MS	NA
AEBP1	1	0	0	up	NA	1.27546e-36	-0.240949	0.655776	0.896725	0.874559	0.176974	1.21356	1.03659	5_preB_G2MS	3_proB_G2MS	NA
YPEL5	1	0	0	up	NA	4.87112e-30	-0.241389	0.431155	0.672544	1.85042e-09	0.402821	1.73744	1.33462	5_preB_G2MS	3_proB_G2MS	NA
EMP3	1	0	0	up	NA	1.20307e-36	-0.24557	0.690198	0.935768	1	0.130497	1.30697	1.17647	5_preB_G2MS	3_proB_G2MS	NA
LDLRAD4	1	0	0	up	NA	6.33723e-33	-0.248619	0.546091	0.79471	0.000584427	0.271847	1.33933	1.06748	5_preB_G2MS	3_proB_G2MS	NA
VAMP8	1	0	0	up	NA	5.57828e-36	-0.249385	0.206534	0.455919	0	0.837446	2.30735	1.46991	5_preB_G2MS	3_proB_G2MS	NA
SNHG7	1	0	0	up	NA	1.64975e-29	-0.250428	0.370478	0.620907	1.44912e-09	0.599445	2.07785	1.47841	5_preB_G2MS	3_proB_G2MS	NA
PHACTR1	1	0	0	up	NA	2.59733e-33	-0.250999	0.584014	0.835013	0.0168017	0.368468	1.59748	1.22901	5_preB_G2MS	3_proB_G2MS	NA
CD19	1	0	0	up	NA	1.16139e-36	-0.251276	0.587515	0.838791	0.00860777	0.230419	1.26167	1.03125	5_preB_G2MS	3_proB_G2MS	NA
HERPUD1	1	0	0	up	NA	4.38683e-33	-0.252527	0.563594	0.816121	0.0072019	0.285638	1.41578	1.13014	5_preB_G2MS	3_proB_G2MS	NA
ABHD15	1	0	0	up	NA	3.43332e-37	-0.2527	0.7007	0.953401	NA	0.078763	1.15984	1.08108	5_preB_G2MS	3_proB_G2MS	NA
GCHFR	1	0	0	up	NA	5.08896e-38	-0.252747	0.66161	0.914358	0.0976926	0.289554	1.31897	1.02941	5_preB_G2MS	3_proB_G2MS	NA
CDC25B	1	0	0	up	NA	3.12447e-38	-0.253879	0.564761	0.81864	0.00885688	0.430109	1.66622	1.23611	5_preB_G2MS	3_proB_G2MS	NA
PCDH9	1	0	0	up	NA	7.72602e-36	-0.254321	0.681447	0.935768	0.661492	0.267184	1.32601	1.05882	5_preB_G2MS	3_proB_G2MS	NA
CDKN2D	1	0	0	up	NA	3.37581e-40	-0.263336	0.469662	0.732997	2.45058e-06	0.449307	1.80308	1.35377	5_preB_G2MS	3_proB_G2MS	NA
CD37	1	0	0	up	NA	2.70724e-30	-0.267363	0.560093	0.827456	7.29499e-10	0.816821	2.0504	1.23358	5_preB_G2MS	3_proB_G2MS	NA
HES6	1	0	0	up	NA	1.68896e-09	-0.269452	0.729288	0.998741	NA	1.32759	1.32759	0	5_preB_G2MS	3_proB_G2MS	NA
PTPRCAP	1	0	0	up	NA	2.24196e-43	-0.27274	0.231039	0.503778	8.53071e-15	0.691499	2.32094	1.62944	5_preB_G2MS	3_proB_G2MS	NA
STIM2	1	0	0	up	NA	4.93053e-42	-0.274761	0.629522	0.904282	0.920234	0.210816	1.28976	1.07895	5_preB_G2MS	3_proB_G2MS	NA
MTPN	1	0	0	up	NA	1.7433e-39	-0.275062	0.363477	0.638539	1.98244e-08	0.345848	1.54445	1.19861	5_preB_G2MS	3_proB_G2MS	NA
CAMK2D	1	0	0	up	NA	1.80167e-27	-0.275129	0.713536	0.988665	NA	1.1446	1.1446	0	5_preB_G2MS	3_proB_G2MS	NA
BTG1	1	1	0	up	up	8.68194e-51	-0.276872	0.108518	0.38539	0	2.79589	4.96597	2.17008	5_preB_G2MS	3_proB_G2MS	NA
DSTN	1	0	0	up	NA	1.51811e-39	-0.277864	0.549592	0.827456	0.0742057	0.275226	1.38472	1.10949	5_preB_G2MS	3_proB_G2MS	NA
EAF2	1	0	0	up	NA	3.40368e-43	-0.281459	0.467911	0.74937	3.13472e-07	0.326578	1.39693	1.07035	5_preB_G2MS	3_proB_G2MS	NA
NSMCE1	1	0	0	up	NA	3.00391e-41	-0.282189	0.532672	0.814861	6.61481e-10	0.69296	1.76779	1.07483	5_preB_G2MS	3_proB_G2MS	NA
SEC11A	1	0	0	up	NA	7.15675e-41	-0.283971	0.364644	0.648615	2.78941e-10	0.372138	1.52984	1.15771	5_preB_G2MS	3_proB_G2MS	NA
CRIP1	1	0	0	up	NA	3.60364e-53	-0.290895	0.483664	0.774559	0.000315358	0.409317	1.8339	1.42458	5_preB_G2MS	3_proB_G2MS	NA
DBI	1	0	0	up	NA	3.85676e-60	-0.30671	0.135356	0.442065	0	0.95376	2.4278	1.47404	5_preB_G2MS	3_proB_G2MS	NA
NCF1	1	0	0	up	NA	2.73845e-49	-0.313702	0.604434	0.918136	0.000904029	0.434672	1.48083	1.04615	5_preB_G2MS	3_proB_G2MS	NA
FCRLA	1	0	0	up	NA	0.000884024	-0.314469	0.685531	1	NA	1.43414	1.43414	0	5_preB_G2MS	3_proB_G2MS	NA
C7orf50	1	0	0	up	NA	1.99376e-50	-0.317203	0.600933	0.918136	0.00133744	0.383738	1.39912	1.01538	5_preB_G2MS	3_proB_G2MS	NA
RP11-620J15.3	1	0	0	up	NA	3.47679e-50	-0.326624	0.410152	0.736776	5.90173e-06	0.357872	1.58754	1.22967	5_preB_G2MS	3_proB_G2MS	NA
ERP29	1	0	0	up	NA	1.49929e-64	-0.329593	0.130105	0.459698	0	0.89617	2.39034	1.49417	5_preB_G2MS	3_proB_G2MS	NA
CD72	1	0	0	up	NA	4.84061e-65	-0.346571	0.439323	0.785894	0.000128389	0.315725	1.4922	1.17647	5_preB_G2MS	3_proB_G2MS	NA
PLD4	1	0	0	up	NA	4.17942e-51	-0.347373	0.616103	0.963476	NA	1.32979	1.32979	0	5_preB_G2MS	3_proB_G2MS	NA
KIAA0226L	1	0	0	up	NA	1.51881e-49	-0.356801	0.607935	0.964736	NA	1.38839	1.38839	0	5_preB_G2MS	3_proB_G2MS	NA
RHOH	1	0	0	up	NA	6.10999e-58	-0.361526	0.508751	0.870277	0.00249173	0.334652	1.40261	1.06796	5_preB_G2MS	3_proB_G2MS	NA
PRDX2	1	0	0	up	NA	2.18788e-70	-0.368615	0.240957	0.609572	0	0.763569	2.16679	1.40323	5_preB_G2MS	3_proB_G2MS	NA
BCL7A	1	0	0	up	NA	2.52416e-62	-0.372326	0.390898	0.763224	5.43014e-07	0.407801	1.58333	1.17553	5_preB_G2MS	3_proB_G2MS	NA
AFF3	1	0	0	up	NA	5.56542e-68	-0.381065	0.516919	0.897985	0.002055	0.33803	1.39976	1.06173	5_preB_G2MS	3_proB_G2MS	NA
PTPN6	1	0	0	up	NA	1.12119e-57	-0.382777	0.57818	0.960957	NA	0.39834	1.39834	1	5_preB_G2MS	3_proB_G2MS	NA
TUBA1A	1	0	0	up	NA	4.20078e-76	-0.391544	0.275963	0.667506	4.17066e-12	0.893707	2.43916	1.54545	5_preB_G2MS	3_proB_G2MS	NA
FAM129C	1	0	0	up	NA	7.68171e-75	-0.404209	0.467328	0.871537	2.36364e-05	0.421128	1.51917	1.09804	5_preB_G2MS	3_proB_G2MS	NA
TFDP2	1	0	0	up	NA	1.01211e-70	-0.40708	0.424154	0.831234	2.72022e-06	0.409843	1.52178	1.11194	5_preB_G2MS	3_proB_G2MS	NA
SMIM14	1	0	0	up	NA	2.37402e-69	-0.407662	0.502917	0.910579	0.00569985	0.416667	1.51526	1.09859	5_preB_G2MS	3_proB_G2MS	NA
C16orf74	1	0	0	up	NA	1.42977e-20	-0.413375	0.582847	0.996222	NA	1.32308	1.32308	0	5_preB_G2MS	3_proB_G2MS	NA
MARCKSL1	1	0	0	up	NA	1.63546e-80	-0.416298	0.262544	0.678841	0	0.727994	2.10839	1.38039	5_preB_G2MS	3_proB_G2MS	NA
LYN	1	0	0	up	NA	3.40368e-43	-0.4177	0.565928	0.983627	NA	1.32124	1.32124	0	5_preB_G2MS	3_proB_G2MS	NA
IGJ	1	0	0	up	NA	1.36775e-64	-0.418636	0.52217	0.940806	1	0.391136	2.77411	2.38298	5_preB_G2MS	3_proB_G2MS	NA
CCDC69	1	0	0	up	NA	5.42009e-81	-0.422213	0.392649	0.814861	1.5851e-08	0.412849	1.51489	1.10204	5_preB_G2MS	3_proB_G2MS	NA
TSPO	1	0	0	up	NA	4.81223e-77	-0.422899	0.337806	0.760705	1.38572e-13	0.737352	1.9163	1.17895	5_preB_G2MS	3_proB_G2MS	NA
PDLIM1	1	1	0	up	up	3.21597e-125	-0.501794	0.117853	0.619647	0	1.3739	2.70833	1.33444	5_preB_G2MS	3_proB_G2MS	NA
SPIB	1	0	0	up	NA	2.08065e-13	-0.512743	0.485998	0.998741	NA	1.58229	1.58229	0	5_preB_G2MS	3_proB_G2MS	NA
IRF4	1	0	0	up	NA	3.10848e-87	-0.514624	0.422404	0.937028	3.64915e-06	0.793535	1.85354	1.06	5_preB_G2MS	3_proB_G2MS	NA
CCDC42B	1	0	0	up	NA	1.54023e-64	-0.536747	0.439323	0.976071	NA	2.04475	2.04475	0	5_preB_G2MS	3_proB_G2MS	NA
RGS2	1	1	0	up	up	9.33257e-177	-0.72454	0.13944	0.86398	0	3.78055	5.0861	1.30556	5_preB_G2MS	3_proB_G2MS	NA
TCL1A	1	0	0	up	NA	9.69874e-106	-0.859171	0.121937	0.981108	NA	11.303	11.303	0	5_preB_G2MS	3_proB_G2MS	NA
IGLL5	1	0	0	up	NA	1.80712e-81	-0.90241	0.0875146	0.989924	NA	7.06841	7.06841	0	5_preB_G2MS	3_proB_G2MS	NA
RPS16	0	0	1	NA	NA	NA	0	0	0	0.000817829	-0.724971	12.675	13.4	5_preB_G2MS	3_proB_G2MS	down
ACTB	0	1	0	NA	up	NA	0	0	0	0	8.46914	35.4603	26.9912	5_preB_G2MS	3_proB_G2MS	NA
PTMA	0	1	0	NA	up	NA	0	0	0	1.08455e-10	7.58691	73.3174	65.7305	5_preB_G2MS	3_proB_G2MS	NA
H3F3A	0	1	0	NA	up	NA	0	0	0	0	7.16298	19.7713	12.6083	5_preB_G2MS	3_proB_G2MS	NA
IGLL1	0	1	0	NA	up	1.66732e-05	-0.0242072	0.00350058	0.0277078	0	4.16854	17.6206	13.4521	5_preB_G2MS	3_proB_G2MS	NA
MT-CO1	0	1	0	NA	up	0.545779	-0.00125945	0	0.00125945	0	4.13228	18.2281	14.0958	5_preB_G2MS	3_proB_G2MS	NA
UBB	0	1	0	NA	up	6.62507e-05	-0.0229478	0.00350058	0.0264484	0	3.9881	11.4655	7.47736	5_preB_G2MS	3_proB_G2MS	NA
HMGB2	0	1	0	NA	up	0.42842	0.00408401	0.00408401	0	0	3.79832	20.5401	16.7418	5_preB_G2MS	3_proB_G2MS	NA
H3F3B	0	1	0	NA	up	0.596548	-0.00316698	0.00816803	0.011335	0	3.71996	11.2282	7.50828	5_preB_G2MS	3_proB_G2MS	NA
FAU	0	1	0	NA	up	0.679365	-0.00193546	0.000583431	0.00251889	0	3.13312	9.41973	6.28662	5_preB_G2MS	3_proB_G2MS	NA
HMGN2	0	1	0	NA	up	0.844815	0.000583431	0.000583431	0	2.49187e-14	3.12194	20.2428	17.1209	5_preB_G2MS	3_proB_G2MS	NA
CD79B	0	1	0	NA	up	0.279437	-0.00460131	0.0659277	0.070529	0	3.04535	8.16052	5.11518	5_preB_G2MS	3_proB_G2MS	NA
RPS24	0	1	0	NA	up	NA	0	0	0	0	2.79177	18.4895	15.6977	5_preB_G2MS	3_proB_G2MS	NA
TMSB10	0	1	0	NA	up	0.724607	0.00116686	0.00116686	0	0	2.78784	16.2009	13.4131	5_preB_G2MS	3_proB_G2MS	NA
RPS27	0	1	0	NA	up	NA	0	0	0	3.8465e-07	2.63473	23.3337	20.699	5_preB_G2MS	3_proB_G2MS	NA
RPL8	0	1	0	NA	up	0.583195	-0.00125945	0	0.00125945	0	2.61748	10.5834	7.96595	5_preB_G2MS	3_proB_G2MS	NA
CXCR4	0	1	0	NA	up	9.76291e-13	-0.0629811	0.0239207	0.0869018	0	2.53183	7.25045	4.71862	5_preB_G2MS	3_proB_G2MS	NA
RPL37	0	1	0	NA	up	NA	0	0	0	0	2.2365	13.7415	11.505	5_preB_G2MS	3_proB_G2MS	NA
HLA-B	0	1	0	NA	up	0.573068	-0.00355349	0.140023	0.143577	0	2.20777	6.58277	4.375	5_preB_G2MS	3_proB_G2MS	NA
RPL26	0	1	0	NA	up	NA	0	0	0	1.04898e-08	1.89132	17.5047	15.6134	5_preB_G2MS	3_proB_G2MS	NA
ACTG1	0	1	0	NA	up	0.693424	-0.000676015	0.000583431	0.00125945	1.05296e-07	1.74728	12.6994	10.9521	5_preB_G2MS	3_proB_G2MS	NA
RPS15	0	1	0	NA	up	NA	0	0	0	1.50256e-06	1.71147	16.6523	14.9408	5_preB_G2MS	3_proB_G2MS	NA
CFL1	0	1	0	NA	up	0.926073	-9.25847e-05	0.00116686	0.00125945	0	1.69872	8.57009	6.87137	5_preB_G2MS	3_proB_G2MS	NA
SPINK2	0	1	0	NA	up	6.27256e-16	0.0908741	0.973746	0.882872	4.90081e-05	1.66595	2.97778	1.31183	5_preB_G2MS	3_proB_G2MS	NA
RPLP2	0	1	0	NA	up	NA	0	0	0	4.23966e-09	1.58322	20.5782	18.995	5_preB_G2MS	3_proB_G2MS	NA
RPL27A	0	1	0	NA	up	NA	0	0	0	1.97016e-07	1.53218	14.7929	13.2607	5_preB_G2MS	3_proB_G2MS	NA
RPS4X	0	1	0	NA	up	NA	0	0	0	1.07334e-06	1.45623	19.1628	17.7065	5_preB_G2MS	3_proB_G2MS	NA
ARPC3	0	1	0	NA	up	2.21912e-11	-0.0780107	0.0466744	0.124685	0	1.29228	3.56854	2.27626	5_preB_G2MS	3_proB_G2MS	NA
MT-CO3	0	1	0	NA	up	NA	0	0	0	8.14816e-06	1.04347	14.9918	13.9484	5_preB_G2MS	3_proB_G2MS	NA
MT-ND2	0	1	0	NA	down	0.000280395	0.0273845	0.0437573	0.0163728	1.04898e-08	-1.03637	6.32215	7.35851	5_preB_G2MS	3_proB_G2MS	NA
MT-ATP6	0	1	0	NA	down	0.00281965	0.0241617	0.0367561	0.0125945	0	-1.06507	5.50636	6.57143	5_preB_G2MS	3_proB_G2MS	NA
ARHGDIB	0	1	0	NA	down	0.311739	0.0116039	0.0204201	0.00881612	0	-1.08463	4.28767	5.3723	5_preB_G2MS	3_proB_G2MS	NA
RPS3	0	1	0	NA	down	NA	0	0	0	0.000506903	-1.10732	15.1383	16.2456	5_preB_G2MS	3_proB_G2MS	NA
RPS23	0	1	0	NA	down	NA	0	0	0	6.28492e-06	-1.273	17.8454	19.1184	5_preB_G2MS	3_proB_G2MS	NA
MT-CYB	0	1	0	NA	down	0.00118802	0.0230595	0.0268378	0.00377834	0	-1.28953	6.15168	7.44121	5_preB_G2MS	3_proB_G2MS	NA
NPM1	0	1	0	NA	down	0.241662	0.0069365	0.0157526	0.00881612	0	-1.33795	6.87552	8.21347	5_preB_G2MS	3_proB_G2MS	NA
RPL36A	0	1	0	NA	down	4.72522e-10	0.0726422	0.10035	0.0277078	0	-1.3401	2.94617	4.28627	5_preB_G2MS	3_proB_G2MS	NA
TPT1	0	1	0	NA	down	NA	0	0	0	2.91786e-08	-1.40416	10.9271	12.3312	5_preB_G2MS	3_proB_G2MS	NA
HSP90AA1	0	1	0	NA	down	0.0326578	0.0256063	0.0344224	0.00881612	1.16902e-13	-1.44986	6.47009	7.91995	5_preB_G2MS	3_proB_G2MS	NA
YBX1	0	1	0	NA	down	0.170643	0.0075846	0.0075846	0	0	-1.49428	5.70723	7.20151	5_preB_G2MS	3_proB_G2MS	NA
MT-ND4	0	1	0	NA	down	0.261936	0.00497312	0.00875146	0.00377834	0	-1.52724	8.02649	9.55373	5_preB_G2MS	3_proB_G2MS	NA
RPS27A	0	1	0	NA	down	NA	0	0	0	4.42948e-06	-1.61937	15.5758	17.1952	5_preB_G2MS	3_proB_G2MS	NA
PPIA	0	1	0	NA	down	0.245137	0.00641774	0.00641774	0	0	-1.68258	7.3212	9.00378	5_preB_G2MS	3_proB_G2MS	NA
RPL15	0	1	0	NA	down	NA	0	0	0	9.75221e-11	-1.7493	15.8086	17.5579	5_preB_G2MS	3_proB_G2MS	NA
RPL23A	0	1	0	NA	down	NA	0	0	0	0	-1.84624	14.213	16.0592	5_preB_G2MS	3_proB_G2MS	NA
PRDX1	0	1	0	NA	down	0.000150726	0.0716429	0.144691	0.0730479	0	-1.94546	2.54775	4.49321	5_preB_G2MS	3_proB_G2MS	NA
H2AFY	0	1	0	NA	down	2.50084e-06	0.0710213	0.0810968	0.0100756	0	-1.96877	3.63683	5.6056	5_preB_G2MS	3_proB_G2MS	NA
RPS13	0	1	0	NA	down	NA	0	0	0	0	-2.07877	11.2865	13.3652	5_preB_G2MS	3_proB_G2MS	NA
RPL32	0	1	0	NA	down	NA	0	0	0	1.02582e-13	-2.20184	17.5677	19.7695	5_preB_G2MS	3_proB_G2MS	NA
RPLP0	0	1	0	NA	down	0.658398	0.00165771	0.00291715	0.00125945	0	-2.37286	9.9134	12.2863	5_preB_G2MS	3_proB_G2MS	NA
B2M	0	1	0	NA	down	0.2741	0.00583431	0.00583431	0	1.25633e-08	-2.44869	15.2717	17.7204	5_preB_G2MS	3_proB_G2MS	NA
VPREB3	0	1	0	NA	down	0.143488	-0.00914825	0.0676779	0.0768262	0	-2.62837	4.33479	6.96317	5_preB_G2MS	3_proB_G2MS	NA
RPS8	0	1	0	NA	down	NA	0	0	0	0	-2.75628	18.0712	20.8275	5_preB_G2MS	3_proB_G2MS	NA
RPL39	0	1	0	NA	down	NA	0	0	0	0	-2.77411	20.5181	23.2922	5_preB_G2MS	3_proB_G2MS	NA
RPLP1	0	1	0	NA	down	NA	0	0	0	5.03531e-09	-2.789	33.6027	36.3917	5_preB_G2MS	3_proB_G2MS	NA
EEF1A1	0	1	0	NA	down	NA	0	0	0	5.84789e-08	-2.97526	32.3786	35.3539	5_preB_G2MS	3_proB_G2MS	NA
RPL18A	0	1	0	NA	down	NA	0	0	0	0	-3.10642	15.9364	19.0428	5_preB_G2MS	3_proB_G2MS	NA
RPS29	0	1	0	NA	down	NA	0	0	0	0	-3.62327	11.3314	14.9547	5_preB_G2MS	3_proB_G2MS	NA
RPL41	0	1	0	NA	down	NA	0	0	0	3.27934e-14	-4.06752	26.7637	30.8312	5_preB_G2MS	3_proB_G2MS	NA
RPL10	0	1	0	NA	down	NA	0	0	0	0	-4.80969	32.1412	36.9509	5_preB_G2MS	3_proB_G2MS	NA
HMGB1	0	1	0	NA	down	NA	0	0	0	0	-7.28718	26.2305	33.5176	5_preB_G2MS	3_proB_G2MS	NA
RPS19	0	1	0	NA	down	0.792078	0.000583431	0.000583431	0	0	-8.19025	13.937	22.1272	5_preB_G2MS	3_proB_G2MS	NA
RPS12	0	1	0	NA	down	NA	0	0	0	0	-9.47309	17.0735	26.5466	5_preB_G2MS	3_proB_G2MS	NA
GAPDH	0	1	0	NA	down	0.0710895	0.0157526	0.0157526	0	0	-12.9403	10.668	23.6083	5_preB_G2MS	3_proB_G2MS	NA
TMSB4X	0	1	0	NA	down	0.34124	0.00233372	0.00233372	0	0	-15.6037	20.6532	36.2569	5_preB_G2MS	3_proB_G2MS	NA

## Sheet: TBL_preBG1.vs.proBG1
gene	DZ	DE	DM	sign_by_DZ	sign_by_DE	zero.pvalue.adj	zero_proportion_difference	c1.zero_proportion	c2.zero_proportion	nonzero.pvalue.adj	relative_difference	c1.maxmean	c2.maxmean	c1.celltype	c2.celltype	DM_nro_clusters_direction
MZB1	1	1	1	down	up	2.62461e-06	0.126654	0.304998	0.178344	7.33637e-05	1.8114	5.23862	3.42722	6_preB_G1	4_proB_G1	up
IGLL1	1	1	1	down	down	4.97159e-14	0.100384	0.132231	0.0318471	0	-10.1128	4.77234	14.8852	6_preB_G1	4_proB_G1	down
DNTT	1	1	0	down	down	3.00587e-167	0.915795	0.929949	0.0141543	0	-11.5329	1.7191	13.252	6_preB_G1	4_proB_G1	NA
CD99	1	1	0	down	down	5.75953e-273	0.725707	0.90122	0.175513	0	-1.886	1.9243	3.8103	6_preB_G1	4_proB_G1	NA
SOCS2	1	0	0	down	NA	1.65001e-167	0.600432	0.974813	0.374381	NA	-0.57056	1.78125	2.35181	6_preB_G1	4_proB_G1	NA
XBP1	1	0	0	down	NA	4.55611e-166	0.540173	0.865014	0.324841	0	-0.897113	1.94461	2.84172	6_preB_G1	4_proB_G1	NA
TKT	1	1	0	down	down	1.93579e-99	0.480595	0.726879	0.246285	0	-1.21156	2.02882	3.24038	6_preB_G1	4_proB_G1	NA
ZFP36L2	1	1	0	down	down	7.41068e-113	0.460756	0.786305	0.325548	0	-1.05923	2.01842	3.07765	6_preB_G1	4_proB_G1	NA
LCN6-1	1	0	0	down	NA	1.06043e-68	0.445304	0.99449	0.549186	NA	-1.81947	0	1.81947	6_preB_G1	4_proB_G1	NA
HPS4	1	0	0	down	NA	5.46615e-122	0.440819	0.90791	0.467091	7.51481e-10	-0.388872	1.7094	2.09827	6_preB_G1	4_proB_G1	NA
SIAH2	1	0	0	down	NA	1.61921e-132	0.436146	0.872098	0.435952	5.91903e-10	-0.338018	1.8	2.13802	6_preB_G1	4_proB_G1	NA
MEF2C	1	0	0	down	NA	6.64772e-123	0.420457	0.913026	0.492569	2.42635e-07	-0.288236	1.93213	2.22036	6_preB_G1	4_proB_G1	NA
NEAT1	1	0	0	down	NA	2.92148e-103	0.417926	0.730028	0.312102	0	-0.735117	2.29883	3.03395	6_preB_G1	4_proB_G1	NA
AKAP12	1	0	0	down	NA	5.66872e-86	0.411375	0.787879	0.376504	7.41964e-16	-0.697696	1.94249	2.64018	6_preB_G1	4_proB_G1	NA
EGFL7	1	0	0	down	NA	5.14962e-27	0.40717	0.998819	0.591649	NA	-1.75043	0	1.75043	6_preB_G1	4_proB_G1	NA
GLRX	1	0	0	down	NA	1.7237e-68	0.401583	0.827627	0.426044	3.02078e-08	-0.35378	1.90639	2.26017	6_preB_G1	4_proB_G1	NA
FAM26F	1	0	0	down	NA	7.92463e-75	0.392481	0.765447	0.372965	5.64457e-11	-0.384383	2.07047	2.45485	6_preB_G1	4_proB_G1	NA
MT1X	1	1	0	down	down	1.49655e-102	0.392354	0.879969	0.487615	2.11042e-15	-1.0207	2.29836	3.31906	6_preB_G1	4_proB_G1	NA
SOD2	1	0	0	down	NA	4.75416e-100	0.387796	0.883904	0.496108	1.44574e-15	-0.59651	1.87119	2.4677	6_preB_G1	4_proB_G1	NA
GNG11	1	0	0	down	NA	1.01769e-100	0.383955	0.979142	0.595188	NA	0.287604	2.22642	1.93881	6_preB_G1	4_proB_G1	NA
LINC01013	1	0	0	down	NA	1.95153e-107	0.382684	0.966549	0.583864	0.00246392	-0.00896359	1.75294	1.7619	6_preB_G1	4_proB_G1	NA
HMHB1	1	0	0	down	NA	1.95153e-107	0.374324	0.939787	0.565464	0.00146196	-0.338901	1.45752	1.79642	6_preB_G1	4_proB_G1	NA
ITM2B	1	0	0	down	NA	1.24563e-58	0.357107	0.611177	0.254069	0	-0.601428	2.21356	2.81499	6_preB_G1	4_proB_G1	NA
GPX1	1	0	0	down	NA	5.04371e-62	0.350967	0.687131	0.336164	0	-0.603909	2.06667	2.67058	6_preB_G1	4_proB_G1	NA
GYPC	1	0	0	down	NA	8.41301e-58	0.347066	0.802834	0.455768	5.77914e-12	-0.380835	1.92216	2.30299	6_preB_G1	4_proB_G1	NA
PLAC8	1	0	0	down	NA	5.3715e-70	0.346865	0.923652	0.576787	0.00383468	-0.201169	1.79381	1.99498	6_preB_G1	4_proB_G1	NA
C5orf56	1	0	0	down	NA	5.48743e-87	0.344402	0.979929	0.635527	NA	-0.148258	1.52941	1.67767	6_preB_G1	4_proB_G1	NA
KLF3	1	0	0	down	NA	9.84146e-98	0.335985	0.977174	0.641189	NA	-0.0993675	1.75862	1.85799	6_preB_G1	4_proB_G1	NA
FHIT	1	0	0	down	NA	1.43889e-69	0.334926	0.854388	0.519462	1.14101e-05	-0.132934	1.85676	1.98969	6_preB_G1	4_proB_G1	NA
TOP2B	1	0	0	down	NA	1.47663e-46	0.330858	0.792995	0.462137	3.52165e-07	-0.218751	1.87072	2.08947	6_preB_G1	4_proB_G1	NA
TXN	1	0	0	down	NA	2.5702e-78	0.329493	0.930342	0.600849	0.00469131	-0.0227792	1.85311	1.87589	6_preB_G1	4_proB_G1	NA
ATP1B3	1	0	0	down	NA	5.42061e-56	0.326202	0.859111	0.532909	3.06787e-06	-0.16097	1.84358	2.00455	6_preB_G1	4_proB_G1	NA
C10orf10	1	0	0	down	NA	8.86597e-88	0.318293	0.977174	0.658882	NA	-0.542352	1.81034	2.3527	6_preB_G1	4_proB_G1	NA
BCL11A	1	0	0	down	NA	4.82023e-67	0.316265	0.911452	0.595188	3.47512e-05	-0.169184	1.81333	1.98252	6_preB_G1	4_proB_G1	NA
CD9	1	1	0	down	down	4.80714e-50	0.313684	0.42621	0.112527	0	-2.50409	3.10357	5.60766	6_preB_G1	4_proB_G1	NA
ADA	1	0	0	down	NA	2.04605e-62	0.313517	0.915781	0.602265	0.0058299	-0.12226	1.65888	1.78114	6_preB_G1	4_proB_G1	NA
H2AFY	1	0	0	down	NA	1.35885e-58	0.309979	0.666667	0.356688	6.64258e-15	-0.413861	1.81936	2.23322	6_preB_G1	4_proB_G1	NA
ZNF22	1	0	0	down	NA	2.84954e-49	0.309719	0.80795	0.498231	1.36259e-06	-0.159888	1.88525	2.04513	6_preB_G1	4_proB_G1	NA
SYNGR1	1	0	0	down	NA	1.07517e-65	0.297306	0.986619	0.689314	NA	-0.103846	1.52941	1.63326	6_preB_G1	4_proB_G1	NA
MLXIP	1	0	0	down	NA	2.57061e-38	0.296251	0.702479	0.406228	2.88413e-09	-0.278773	2.00132	2.2801	6_preB_G1	4_proB_G1	NA
VPREB1	1	1	0	down	down	6.72916e-42	0.28166	0.322708	0.0410474	0	-4.16461	4.82801	8.99262	6_preB_G1	4_proB_G1	NA
MPP1	1	0	0	down	NA	3.99448e-37	0.281219	0.855175	0.573956	0.0566837	-0.0308663	1.69837	1.72924	6_preB_G1	4_proB_G1	NA
PTGES3	1	0	0	down	NA	1.60781e-36	0.280378	0.797717	0.517339	1.47093e-05	-0.0815181	1.9786	2.06012	6_preB_G1	4_proB_G1	NA
PNRC1	1	0	0	down	NA	2.17722e-39	0.279754	0.552932	0.273178	0	-0.372882	2.46743	2.84031	6_preB_G1	4_proB_G1	NA
DCK	1	0	0	down	NA	6.4226e-58	0.274433	0.914207	0.639774	9.51509e-10	0.168193	1.83028	1.66208	6_preB_G1	4_proB_G1	NA
LAT2	1	0	0	down	NA	1.41419e-29	0.273952	0.737505	0.463553	2.71855e-07	-0.0505473	2.07346	2.12401	6_preB_G1	4_proB_G1	NA
SNX2	1	0	0	down	NA	4.77843e-32	0.271866	0.776466	0.5046	4.70408e-08	-0.0215191	1.93134	1.95286	6_preB_G1	4_proB_G1	NA
ESD	1	0	0	down	NA	1.21479e-23	0.270053	0.688312	0.418259	1.10175e-06	-0.170925	2.08333	2.25426	6_preB_G1	4_proB_G1	NA
IFITM3	1	0	0	down	NA	9.90763e-45	0.265938	0.994884	0.728946	NA	-1.55091	0	1.55091	6_preB_G1	4_proB_G1	NA
CYGB	1	0	0	down	NA	5.52696e-12	0.262168	0.999606	0.737438	NA	-1.55526	0	1.55526	6_preB_G1	4_proB_G1	NA
COMT	1	0	0	down	NA	2.40288e-52	0.259826	0.934278	0.674452	5.79134e-05	0.0890784	1.63473	1.54565	6_preB_G1	4_proB_G1	NA
SOD1	1	0	0	down	NA	4.02822e-35	0.258321	0.838646	0.580326	6.44145e-05	0.0467692	1.9439	1.89713	6_preB_G1	4_proB_G1	NA
PDE4B	1	0	0	down	NA	9.70688e-64	0.253097	0.969303	0.716207	0.575988	-0.137669	1.4359	1.57357	6_preB_G1	4_proB_G1	NA
TSC22D4	1	0	0	down	NA	2.55106e-37	0.251674	0.878001	0.626327	6.39846e-06	0.0747923	1.69032	1.61553	6_preB_G1	4_proB_G1	NA
TP53INP1	1	0	0	down	NA	7.85219e-72	0.24883	0.948052	0.699222	0.109404	-0.0542602	1.51515	1.56941	6_preB_G1	4_proB_G1	NA
MTF2	1	0	0	down	NA	4.20349e-36	0.243561	0.864227	0.620665	2.64607e-11	0.0941759	1.78261	1.68843	6_preB_G1	4_proB_G1	NA
GUK1	1	0	0	down	NA	2.12832e-25	0.242416	0.733569	0.491154	5.24548e-06	-0.0262222	1.93205	1.95828	6_preB_G1	4_proB_G1	NA
SLC44A1	1	0	0	down	NA	2.04382e-56	0.239713	0.952381	0.712668	0.00755279	0.12356	1.56198	1.43842	6_preB_G1	4_proB_G1	NA
ARPP21	1	0	0	down	NA	5.73012e-29	0.239141	0.680047	0.440906	1.67108e-05	-0.167721	2.06519	2.23291	6_preB_G1	4_proB_G1	NA
PPP1R18	1	0	0	down	NA	1.25526e-37	0.238178	0.909091	0.670913	0.000585923	0.0469488	1.61039	1.56344	6_preB_G1	4_proB_G1	NA
ELK3	1	0	0	down	NA	1.41131e-45	0.23755	0.994097	0.756546	NA	-1.40407	0	1.40407	6_preB_G1	4_proB_G1	NA
ERG	1	0	0	down	NA	1.47486e-11	0.236691	0.999606	0.762916	NA	-1.3403	0	1.3403	6_preB_G1	4_proB_G1	NA
KLF6	1	0	0	down	NA	4.64453e-36	0.234612	0.796537	0.561925	1.21407e-09	0.128969	2.26306	2.13409	6_preB_G1	4_proB_G1	NA
TSPAN14	1	0	0	down	NA	6.96319e-58	0.234041	0.941755	0.707714	0.0106288	0.00925987	1.55405	1.54479	6_preB_G1	4_proB_G1	NA
AP3S1	1	0	0	down	NA	4.13708e-43	0.232903	0.902401	0.669498	8.76918e-07	0.143227	1.69355	1.55032	6_preB_G1	4_proB_G1	NA
CSRNP1	1	0	0	down	NA	1.38307e-43	0.229447	0.90673	0.677282	9.16182e-05	0.117727	1.62869	1.51096	6_preB_G1	4_proB_G1	NA
ATP5J	1	0	0	down	NA	2.41628e-14	0.229425	0.632822	0.403397	5.94568e-08	0.0224089	2.17899	2.15658	6_preB_G1	4_proB_G1	NA
THEMIS2	1	0	0	down	NA	5.31046e-54	0.228938	0.950807	0.721868	0.369929	-0.0728957	1.464	1.5369	6_preB_G1	4_proB_G1	NA
LDHB	1	0	0	down	NA	2.49869e-27	0.228415	0.563164	0.334749	1.01782e-06	-0.223308	2.01712	2.24043	6_preB_G1	4_proB_G1	NA
KLF10	1	0	0	down	NA	8.57445e-54	0.22833	0.972845	0.744515	NA	-0.114497	1.66667	1.78116	6_preB_G1	4_proB_G1	NA
MZT2A	1	0	0	down	NA	3.38963e-31	0.228091	0.886265	0.658174	0.0091541	0.0241283	1.74048	1.71636	6_preB_G1	4_proB_G1	NA
GBP4	1	0	0	down	NA	9.06701e-56	0.22747	0.978355	0.750885	NA	0.0244318	1.52727	1.50284	6_preB_G1	4_proB_G1	NA
IER2	1	0	0	down	NA	7.73627e-39	0.225647	0.879575	0.653928	1.62945e-05	-0.00334817	2.06209	2.06544	6_preB_G1	4_proB_G1	NA
LTB	1	1	0	down	down	5.23683e-36	0.22462	0.707989	0.483369	0	-1.08985	1.71563	2.80548	6_preB_G1	4_proB_G1	NA
FXYD5	1	0	0	down	NA	2.52348e-30	0.224506	0.836678	0.612173	0.016102	-0.0921511	1.90602	1.99818	6_preB_G1	4_proB_G1	NA
AIF1	1	0	0	down	NA	1.43679e-63	0.224133	0.941755	0.717622	2.61269e-08	-0.495004	1.34459	1.8396	6_preB_G1	4_proB_G1	NA
SERPINB1	1	0	0	down	NA	4.02598e-31	0.223706	0.905943	0.682236	1.32639e-05	0.142418	1.79498	1.65256	6_preB_G1	4_proB_G1	NA
DUSP1	1	0	0	down	NA	3.19433e-32	0.222539	0.585596	0.363057	3.9474e-13	-0.570465	2.55176	3.12222	6_preB_G1	4_proB_G1	NA
OST4	1	0	0	down	NA	4.16591e-15	0.220585	0.597796	0.377212	0.000152258	-0.0563957	2.30724	2.36364	6_preB_G1	4_proB_G1	NA
GPX4	1	0	0	down	NA	3.13781e-28	0.219667	0.792208	0.572541	1.14415e-10	0.0934803	2.05871	1.96523	6_preB_G1	4_proB_G1	NA
SEC63	1	0	0	down	NA	2.62492e-33	0.218583	0.893743	0.675159	5.08203e-08	0.123965	1.69259	1.56863	6_preB_G1	4_proB_G1	NA
VAMP5	1	0	0	down	NA	4.42413e-49	0.21487	0.958678	0.743808	0.148554	-0.0437253	1.51429	1.55801	6_preB_G1	4_proB_G1	NA
RPS4Y2	1	0	0	down	NA	8.52701e-25	0.213571	0.998426	0.784855	NA	-2.21053	0	2.21053	6_preB_G1	4_proB_G1	NA
SUSD3	1	0	0	down	NA	4.07128e-49	0.212456	0.983865	0.771408	NA	-0.0644869	1.36585	1.43034	6_preB_G1	4_proB_G1	NA
SEP15	1	0	0	down	NA	2.88325e-12	0.211758	0.576938	0.36518	2.61888e-06	-0.0883493	2.21488	2.30323	6_preB_G1	4_proB_G1	NA
MZT2B	1	0	0	down	NA	5.8834e-13	0.210966	0.737505	0.526539	3.90784e-09	0.151272	2.10045	1.94918	6_preB_G1	4_proB_G1	NA
NDUFB1	1	0	0	down	NA	1.88838e-15	0.210688	0.77686	0.566171	2.01083e-08	0.0583766	2.0388	1.98042	6_preB_G1	4_proB_G1	NA
TLE4	1	0	0	down	NA	6.62094e-24	0.207913	0.668634	0.460722	2.00984e-07	-0.114404	2.0772	2.1916	6_preB_G1	4_proB_G1	NA
HHEX	1	0	0	down	NA	4.79297e-43	0.205971	0.944116	0.738146	0.00418211	-0.038523	1.6831	1.72162	6_preB_G1	4_proB_G1	NA
RABAC1	1	0	0	down	NA	9.10313e-19	0.205784	0.745769	0.539986	9.10025e-14	0.168092	2.06502	1.89692	6_preB_G1	4_proB_G1	NA
RPS4Y1	1	0	0	down	NA	5.97842e-36	0.205757	0.717434	0.511677	0.930643	-0.00666101	2.94986	2.95652	6_preB_G1	4_proB_G1	NA
NDUFA5	1	0	0	down	NA	3.35552e-17	0.204464	0.764266	0.559802	2.11042e-15	0.117245	1.90985	1.7926	6_preB_G1	4_proB_G1	NA
CLIC1	1	0	0	down	NA	1.44688e-12	0.203369	0.686738	0.483369	0.00162802	-0.0474427	2.1005	2.14795	6_preB_G1	4_proB_G1	NA
LRRFIP1	1	0	0	down	NA	1.05196e-13	0.203135	0.772137	0.569002	1.23768e-07	0.0292759	2.02763	1.99836	6_preB_G1	4_proB_G1	NA
UBE2J1	1	0	0	down	NA	7.84605e-15	0.201752	0.723337	0.521585	4.31775e-13	-0.0323129	2.06828	2.10059	6_preB_G1	4_proB_G1	NA
PEBP1	1	0	0	down	NA	9.69065e-12	0.201566	0.693428	0.491861	3.98518e-08	0.0828199	2.13992	2.0571	6_preB_G1	4_proB_G1	NA
NDUFA1	1	0	0	down	NA	2.30839e-12	0.201434	0.63597	0.434536	1.75271e-07	-0.0293313	2.13838	2.16771	6_preB_G1	4_proB_G1	NA
RTN4	1	0	0	down	NA	3.11995e-18	0.201207	0.812672	0.611465	1.25844e-09	0.139876	1.90126	1.76138	6_preB_G1	4_proB_G1	NA
SPCS2	1	0	0	down	NA	3.69536e-14	0.200797	0.794569	0.593772	3.27039e-08	0.0665692	1.94636	1.87979	6_preB_G1	4_proB_G1	NA
CD53	1	0	0	down	NA	4.15738e-12	0.200172	0.798898	0.598726	2.85108e-10	0.0665604	1.90607	1.83951	6_preB_G1	4_proB_G1	NA
AMD1	1	0	0	down	NA	2.39747e-32	0.199551	0.890988	0.691437	7.49925e-09	0.105811	1.787	1.68119	6_preB_G1	4_proB_G1	NA
LINC00426	1	0	0	down	NA	3.58896e-37	0.198024	0.939	0.740977	0.0304627	0.086709	1.47742	1.39071	6_preB_G1	4_proB_G1	NA
TMEM59	1	0	0	down	NA	3.97652e-16	0.196402	0.803621	0.607219	8.26416e-14	0.179429	1.8497	1.67027	6_preB_G1	4_proB_G1	NA
OSTC	1	0	0	down	NA	2.24174e-13	0.195436	0.780008	0.584572	1.7408e-05	-0.0254836	1.8229	1.84838	6_preB_G1	4_proB_G1	NA
PSMB9	1	0	0	down	NA	6.13609e-10	0.194523	0.728847	0.534324	8.02423e-07	0.0635563	2.00581	1.94225	6_preB_G1	4_proB_G1	NA
EIF4A1	1	0	0	down	NA	2.74499e-19	0.194118	0.633609	0.43949	0.00567284	-0.114689	1.94844	2.06313	6_preB_G1	4_proB_G1	NA
DEK	1	0	0	down	NA	1.16248e-23	0.193585	0.902007	0.708422	8.92494e-07	0.119897	1.86747	1.74757	6_preB_G1	4_proB_G1	NA
DUT	1	0	0	down	NA	1.59995e-17	0.193522	0.834711	0.641189	8.46692e-05	0.067033	1.8619	1.79487	6_preB_G1	4_proB_G1	NA
ZCCHC7	1	0	0	down	NA	2.95593e-09	0.191857	0.653286	0.46143	5.92753e-08	-0.0503833	2.16118	2.21156	6_preB_G1	4_proB_G1	NA
C14orf2	1	0	0	down	NA	6.4913e-16	0.18949	0.478945	0.289455	0.0127672	-0.0764465	2.31798	2.39442	6_preB_G1	4_proB_G1	NA
COX6A1	1	0	0	down	NA	2.4754e-08	0.187971	0.702479	0.514508	6.63489e-09	0.0938074	2.08069	1.98688	6_preB_G1	4_proB_G1	NA
SMC4	1	0	0	down	NA	2.95687e-37	0.184501	0.941755	0.757254	1.61555e-05	0.0713498	1.7973	1.72595	6_preB_G1	4_proB_G1	NA
ARID5A	1	0	0	down	NA	1.04012e-30	0.184385	0.902007	0.717622	3.54698e-05	0.0993146	1.71084	1.61153	6_preB_G1	4_proB_G1	NA
CD34	1	0	0	down	NA	8.86186e-15	0.183219	0.999213	0.815994	NA	-1.46154	0	1.46154	6_preB_G1	4_proB_G1	NA
RASGRP2	1	0	0	down	NA	2.86863e-18	0.181791	0.82015	0.638358	5.45537e-14	0.174579	1.89278	1.7182	6_preB_G1	4_proB_G1	NA
AK1	1	0	0	down	NA	3.32517e-50	0.181006	0.9878	0.806794	NA	-0.177006	1.3871	1.5641	6_preB_G1	4_proB_G1	NA
TTC3	1	0	0	down	NA	2.85364e-25	0.180572	0.860685	0.680113	1.63484e-12	0.211202	1.9435	1.7323	6_preB_G1	4_proB_G1	NA
PPP1R14B	1	0	0	down	NA	7.00077e-25	0.179854	0.850059	0.670205	9.63034e-07	-0.0395222	1.74803	1.78755	6_preB_G1	4_proB_G1	NA
CDCA7L	1	0	0	down	NA	2.17017e-25	0.17796	0.926013	0.748054	1.02426e-05	0.156467	1.66489	1.50843	6_preB_G1	4_proB_G1	NA
NUCB2	1	0	0	down	NA	1.29991e-13	0.177869	0.830382	0.652512	2.09583e-06	0.119081	1.97448	1.8554	6_preB_G1	4_proB_G1	NA
ATP5G3	1	0	0	down	NA	9.35239e-05	0.177828	0.70366	0.525832	3.86097e-06	-0.00540524	2.06773	2.07313	6_preB_G1	4_proB_G1	NA
FKBP1A	1	0	0	down	NA	3.77265e-08	0.177371	0.551751	0.374381	9.14003e-09	-0.0441176	2.23529	2.27941	6_preB_G1	4_proB_G1	NA
SH3BGRL3	1	1	0	down	down	3.69828e-31	0.177157	0.325069	0.147912	0	-1.04109	2.46472	3.50581	6_preB_G1	4_proB_G1	NA
C1orf228	1	0	0	down	NA	2.84597e-34	0.176187	0.964581	0.788393	0.00132943	0.192939	1.64444	1.45151	6_preB_G1	4_proB_G1	NA
TSC22D3	1	0	0	down	NA	3.02918e-20	0.175516	0.58599	0.410474	4.08916e-15	-0.568638	2.19487	2.76351	6_preB_G1	4_proB_G1	NA
NUDT1	1	0	0	down	NA	9.07282e-33	0.175232	0.951594	0.776362	0.000914462	0.1228	1.68293	1.56013	6_preB_G1	4_proB_G1	NA
TCF4	1	0	0	down	NA	2.01116e-08	0.174835	0.614325	0.43949	1.53965e-09	-0.0664296	2.17347	2.2399	6_preB_G1	4_proB_G1	NA
PRDX6	1	0	0	down	NA	4.95192e-10	0.174012	0.743015	0.569002	7.87795e-15	0.173485	2.03063	1.85714	6_preB_G1	4_proB_G1	NA
NDUFB11	1	0	0	down	NA	8.69219e-10	0.173573	0.777253	0.60368	3.70796e-05	0.0845533	1.9417	1.85714	6_preB_G1	4_proB_G1	NA
YWHAQ	1	0	0	down	NA	1.41337e-06	0.171647	0.652893	0.481246	1.62279e-10	0.0997624	2.18707	2.08731	6_preB_G1	4_proB_G1	NA
APRT	1	0	0	down	NA	3.32633e-13	0.171007	0.80795	0.636943	4.52687e-06	0.0491883	1.88934	1.84016	6_preB_G1	4_proB_G1	NA
RAP1B	1	0	0	down	NA	4.45631e-11	0.170818	0.774498	0.60368	2.29653e-12	0.189853	1.97557	1.78571	6_preB_G1	4_proB_G1	NA
MAP1LC3B	1	0	0	down	NA	1.83367e-09	0.170009	0.584022	0.414013	0	0.105701	2.22044	2.11473	6_preB_G1	4_proB_G1	NA
GAB1	1	0	0	down	NA	1.69073e-40	0.169811	0.957497	0.787686	0.0236879	0.072963	1.46296	1.39	6_preB_G1	4_proB_G1	NA
GADD45A	1	0	0	down	NA	2.4187e-21	0.168187	0.902794	0.734607	0.000396332	0.141495	1.68016	1.53867	6_preB_G1	4_proB_G1	NA
MTDH	1	0	0	down	NA	9.52362e-09	0.167983	0.686738	0.518754	2.58475e-10	0.0397502	2.11181	2.07206	6_preB_G1	4_proB_G1	NA
EID1	1	0	0	down	NA	2.75969e-06	0.167575	0.587957	0.420382	1.65007e-09	0.0218626	2.24164	2.21978	6_preB_G1	4_proB_G1	NA
SEC61G	1	0	0	down	NA	0.000157274	0.167456	0.544667	0.377212	1.3842e-08	-0.062555	2.28176	2.34432	6_preB_G1	4_proB_G1	NA
ENG	1	0	0	down	NA	3.76497e-41	0.166293	0.978749	0.812456	NA	0.0784067	1.44444	1.36604	6_preB_G1	4_proB_G1	NA
KIAA1033	1	0	0	down	NA	2.7839e-24	0.16614	0.900039	0.7339	3.39738e-08	0.224619	1.70866	1.48404	6_preB_G1	4_proB_G1	NA
PPP3CC	1	0	0	down	NA	3.89783e-22	0.165809	0.882723	0.716914	7.1815e-09	0.164966	1.74497	1.58	6_preB_G1	4_proB_G1	NA
PAG1	1	0	0	down	NA	1.89293e-15	0.164089	0.893743	0.729653	6.45409e-05	0.0657165	1.62593	1.56021	6_preB_G1	4_proB_G1	NA
FKBP8	1	0	0	down	NA	7.42048e-11	0.163804	0.841795	0.67799	1.52222e-13	0.219665	1.75373	1.53407	6_preB_G1	4_proB_G1	NA
MYLK	1	0	0	down	NA	4.29758e-37	0.163379	0.97442	0.81104	NA	0.108672	1.43077	1.3221	6_preB_G1	4_proB_G1	NA
MDM2	1	0	0	down	NA	9.68466e-41	0.163293	0.966549	0.803255	0.104613	0.0529412	1.55294	1.5	6_preB_G1	4_proB_G1	NA
SLC25A26	1	0	0	down	NA	1.17809e-24	0.162757	0.898072	0.735315	0.00088736	0.0782421	1.63707	1.55882	6_preB_G1	4_proB_G1	NA
COPE	1	0	0	down	NA	1.10509e-05	0.162219	0.745376	0.583156	1.44574e-15	0.226064	1.96291	1.73684	6_preB_G1	4_proB_G1	NA
SLC8A1-AS1	1	0	0	down	NA	1.9027e-39	0.161884	0.973632	0.811748	NA	0.0427561	1.31343	1.27068	6_preB_G1	4_proB_G1	NA
JUP	1	0	0	down	NA	1.30919e-30	0.161005	0.957891	0.796886	0.0155459	0.194731	1.53271	1.33798	6_preB_G1	4_proB_G1	NA
RTN3	1	0	0	down	NA	1.80408e-32	0.160704	0.972452	0.811748	NA	0.166165	1.55714	1.39098	6_preB_G1	4_proB_G1	NA
SLC38A1	1	0	0	down	NA	1.69767e-22	0.160647	0.912239	0.751592	1.23703e-05	0.157717	1.6278	1.47009	6_preB_G1	4_proB_G1	NA
UQCR10	1	0	0	down	NA	0.000272881	0.16041	0.744982	0.584572	9.40557e-08	0.118648	2.03858	1.91993	6_preB_G1	4_proB_G1	NA
UBE2D2	1	0	0	down	NA	1.59176e-08	0.160347	0.677686	0.517339	7.51644e-13	0.108211	2.06716	1.95894	6_preB_G1	4_proB_G1	NA
NR3C1	1	0	0	down	NA	5.41607e-13	0.160315	0.810704	0.650389	5.77466e-13	0.0990262	1.83992	1.74089	6_preB_G1	4_proB_G1	NA
SYPL1	1	0	0	down	NA	4.09207e-11	0.16011	0.843762	0.683652	8.71834e-10	0.160939	1.83879	1.67785	6_preB_G1	4_proB_G1	NA
POLA2	1	0	0	down	NA	1.78074e-35	0.159702	0.994097	0.834395	NA	-1.50855	0	1.50855	6_preB_G1	4_proB_G1	NA
IFI16	1	0	0	down	NA	3.47642e-09	0.159638	0.842582	0.682944	1.61738e-10	0.25	1.9375	1.6875	6_preB_G1	4_proB_G1	NA
RNASET2	1	0	0	down	NA	3.20058e-21	0.159529	0.894136	0.734607	8.49248e-13	0.237403	1.85874	1.62133	6_preB_G1	4_proB_G1	NA
DUSP26	1	0	0	down	NA	7.02378e-34	0.157814	0.992916	0.835103	NA	-1.30472	0	1.30472	6_preB_G1	4_proB_G1	NA
ARL6IP5	1	0	0	down	NA	9.22188e-17	0.157502	0.912633	0.755131	0.117634	0.105713	1.6982	1.59249	6_preB_G1	4_proB_G1	NA
SNRPD1	1	0	0	down	NA	3.59494e-05	0.156436	0.782763	0.626327	2.75966e-09	0.184453	1.9837	1.79924	6_preB_G1	4_proB_G1	NA
SH3TC1	1	0	0	down	NA	8.03e-33	0.156196	0.945297	0.789101	0.000444191	0.179518	1.47482	1.2953	6_preB_G1	4_proB_G1	NA
SRSF5	1	0	0	down	NA	4.4171e-12	0.155129	0.397875	0.242746	0	-0.731195	2.27908	3.01028	6_preB_G1	4_proB_G1	NA
SMS	1	0	0	down	NA	1.25382e-30	0.155118	0.969697	0.814579	0.000254602	0.22876	1.67532	1.44656	6_preB_G1	4_proB_G1	NA
U2AF1	1	0	0	down	NA	9.12754e-06	0.154695	0.688312	0.533616	0	0.213625	2.05429	1.84067	6_preB_G1	4_proB_G1	NA
HSD17B11	1	0	0	down	NA	8.88624e-05	0.154021	0.723731	0.56971	2.65248e-12	0.200438	2.00142	1.80099	6_preB_G1	4_proB_G1	NA
PSMB8	1	0	0	down	NA	9.84288e-05	0.153948	0.730028	0.576079	1.40238e-11	0.118417	1.95481	1.83639	6_preB_G1	4_proB_G1	NA
ACTN1	1	0	0	down	NA	1.2321e-27	0.153805	0.995277	0.841472	NA	-1.31696	0	1.31696	6_preB_G1	4_proB_G1	NA
NPY	1	0	0	down	NA	0.00015931	0.153574	1	0.846426	NA	-1.71889	0	1.71889	6_preB_G1	4_proB_G1	NA
PAIP2	1	0	0	down	NA	4.48503e-05	0.153113	0.511216	0.358103	5.65768e-10	0.177588	2.50725	2.32966	6_preB_G1	4_proB_G1	NA
PHB	1	0	0	down	NA	1.64651e-22	0.152799	0.929162	0.776362	0.00793303	0.0652602	1.62222	1.55696	6_preB_G1	4_proB_G1	NA
IGFBP7	1	0	0	down	NA	3.95495e-29	0.152535	0.982684	0.830149	NA	-0.172348	1.43182	1.60417	6_preB_G1	4_proB_G1	NA
EIF1AY	1	0	0	down	NA	4.02598e-31	0.152357	0.959858	0.807502	5.51956e-05	0.105392	1.92157	1.81618	6_preB_G1	4_proB_G1	NA
HNRNPM	1	0	0	down	NA	0.000862704	0.152036	0.619835	0.467799	6.17676e-11	0.156758	2.32298	2.16622	6_preB_G1	4_proB_G1	NA
UBE2L3	1	0	0	down	NA	1.60464e-06	0.151568	0.790634	0.639066	1.44574e-15	0.269652	1.88534	1.61569	6_preB_G1	4_proB_G1	NA
STARD3	1	0	0	down	NA	5.09006e-35	0.150247	0.974026	0.823779	NA	0.163198	1.42424	1.26104	6_preB_G1	4_proB_G1	NA
TCEAL8	1	0	0	down	NA	7.79531e-15	0.149727	0.923259	0.773531	1.29678e-05	0.177003	1.60513	1.42813	6_preB_G1	4_proB_G1	NA
RCN2	1	0	0	down	NA	1.11316e-11	0.149578	0.848091	0.698514	6.01899e-15	0.239802	1.75389	1.51408	6_preB_G1	4_proB_G1	NA
FNBP1	1	0	0	down	NA	2.97274e-15	0.149486	0.917355	0.76787	4.20154e-06	0.180952	1.68095	1.5	6_preB_G1	4_proB_G1	NA
CALCOCO2	1	0	0	down	NA	3.75781e-17	0.149026	0.930342	0.781316	0.000118846	0.163677	1.56497	1.40129	6_preB_G1	4_proB_G1	NA
N4BP2L2	1	0	0	down	NA	1.14942e-09	0.148381	0.580087	0.431706	1.31061e-09	0.0151237	2.32521	2.31009	6_preB_G1	4_proB_G1	NA
ATPIF1	1	0	0	down	NA	1.40894e-05	0.147722	0.798111	0.650389	2.1231e-11	0.197781	1.91033	1.71255	6_preB_G1	4_proB_G1	NA
DYNLL1	1	0	0	down	NA	1.19289e-05	0.147672	0.829201	0.681529	4.59804e-05	0.123451	2.03456	1.91111	6_preB_G1	4_proB_G1	NA
SSBP2	1	0	0	down	NA	0.000768418	0.147654	0.643054	0.4954	4.27432e-08	-0.0202864	2.10033	2.12062	6_preB_G1	4_proB_G1	NA
PLIN3	1	0	0	down	NA	2.6266e-13	0.147428	0.903975	0.756546	8.65851e-06	0.140393	1.62295	1.48256	6_preB_G1	4_proB_G1	NA
HSPA8	1	0	0	down	NA	0.000512321	0.147234	0.614325	0.467091	4.52687e-06	0.00402336	2.23776	2.23373	6_preB_G1	4_proB_G1	NA
ANAPC16	1	0	0	down	NA	5.15535e-06	0.147122	0.662338	0.515216	7.09367e-13	0.219575	2.13636	1.91679	6_preB_G1	4_proB_G1	NA
PARK7	1	0	0	down	NA	7.95505e-05	0.146838	0.694608	0.547771	2.46837e-10	0.0786103	2.0567	1.97809	6_preB_G1	4_proB_G1	NA
SVIP	1	0	0	down	NA	8.59072e-25	0.146192	0.9268	0.780609	3.0311e-05	0.162366	1.80108	1.63871	6_preB_G1	4_proB_G1	NA
RAG1	1	0	0	down	NA	4.92107e-29	0.145934	0.903188	0.757254	4.25615e-05	0.12764	1.58537	1.45773	6_preB_G1	4_proB_G1	NA
CLEC2B	1	0	0	down	NA	9.89465e-21	0.145792	0.919323	0.773531	1.83564e-06	0.160442	1.70732	1.54688	6_preB_G1	4_proB_G1	NA
ANKRD28	1	0	0	down	NA	3.82675e-26	0.145722	0.929162	0.783439	3.01274e-05	0.0872549	1.78333	1.69608	6_preB_G1	4_proB_G1	NA
SSR4	1	0	0	down	NA	2.56988e-08	0.145703	0.658796	0.513093	1.50535e-12	0.120609	2.21799	2.09738	6_preB_G1	4_proB_G1	NA
VAMP2	1	0	0	down	NA	1.50853e-07	0.145546	0.492326	0.34678	7.46632e-11	0.0763259	2.46744	2.39112	6_preB_G1	4_proB_G1	NA
SON	1	0	0	down	NA	5.39388e-08	0.145417	0.522629	0.377212	2.37039e-14	0.206943	2.40808	2.20114	6_preB_G1	4_proB_G1	NA
UBL5	1	0	0	down	NA	0.00072671	0.145091	0.593074	0.447983	8.31517e-05	-0.0155731	2.18956	2.20513	6_preB_G1	4_proB_G1	NA
ARPC5	1	0	0	down	NA	1.11625e-05	0.144563	0.784337	0.639774	2.37152e-09	0.182844	1.97263	1.78978	6_preB_G1	4_proB_G1	NA
WSB1	1	0	0	down	NA	2.56301e-10	0.144511	0.811885	0.667374	0	0.322238	1.94351	1.62128	6_preB_G1	4_proB_G1	NA
MDK	1	0	0	down	NA	6.55163e-32	0.143973	0.992523	0.848549	NA	-1.65421	0	1.65421	6_preB_G1	4_proB_G1	NA
PYURF	1	0	0	down	NA	5.79169e-07	0.143607	0.77135	0.627742	0	0.290986	1.88985	1.59886	6_preB_G1	4_proB_G1	NA
SEPT9	1	0	0	down	NA	7.21133e-05	0.143402	0.720189	0.576787	1.44574e-15	0.154178	1.94515	1.79097	6_preB_G1	4_proB_G1	NA
TMED2	1	0	0	down	NA	3.85802e-11	0.143241	0.799292	0.656051	1.28903e-12	0.182305	1.93333	1.75103	6_preB_G1	4_proB_G1	NA
GSTP1	1	0	0	down	NA	3.83613e-19	0.14293	0.803227	0.660297	0.019035	-0.196667	1.62	1.81667	6_preB_G1	4_proB_G1	NA
CPNE1	1	0	0	down	NA	1.13367e-06	0.142441	0.868556	0.726115	1.76708e-09	0.201071	1.69461	1.49354	6_preB_G1	4_proB_G1	NA
PTPRE	1	0	0	down	NA	4.83568e-05	0.140929	0.76584	0.624912	8.1334e-09	0.101744	1.83193	1.73019	6_preB_G1	4_proB_G1	NA
REL	1	0	0	down	NA	3.22984e-20	0.140808	0.887446	0.746638	8.18917e-10	0.218346	1.83566	1.61732	6_preB_G1	4_proB_G1	NA
POLD4	1	0	0	down	NA	3.54013e-10	0.140318	0.868556	0.728238	7.9098e-10	0.218937	1.78144	1.5625	6_preB_G1	4_proB_G1	NA
GMFG	1	1	0	down	down	1.26075e-28	0.139924	0.201495	0.0615711	0	-1.57115	2.58797	4.15913	6_preB_G1	4_proB_G1	NA
GIMAP2	1	0	0	down	NA	1.01157e-25	0.139234	0.970091	0.830856	0.933696	-0.0458599	1.27632	1.32218	6_preB_G1	4_proB_G1	NA
ANKRD10	1	0	0	down	NA	2.7686e-12	0.139061	0.87013	0.731069	1.6223e-07	0.20933	1.69091	1.48158	6_preB_G1	4_proB_G1	NA
SRSF2	1	0	0	down	NA	0.000746919	0.13895	0.669028	0.530078	4.03603e-06	0.00547971	2.13199	2.12651	6_preB_G1	4_proB_G1	NA
KIAA0125	1	0	0	down	NA	1.27895e-08	0.138899	0.865014	0.726115	1.83703e-09	0.232362	2.04373	1.81137	6_preB_G1	4_proB_G1	NA
SUN2	1	0	0	down	NA	9.94917e-13	0.138767	0.891775	0.753008	1.01959e-10	0.282157	1.70909	1.42693	6_preB_G1	4_proB_G1	NA
XRCC6	1	0	0	down	NA	7.61484e-05	0.138661	0.862652	0.723992	4.59304e-08	0.177261	1.75931	1.58205	6_preB_G1	4_proB_G1	NA
ZC3HAV1	1	0	0	down	NA	1.24823e-18	0.13849	0.931129	0.79264	7.44866e-07	0.214569	1.65143	1.43686	6_preB_G1	4_proB_G1	NA
UQCR11-1	1	0	0	down	NA	0.00022499	0.13779	0.689099	0.551309	4.35923e-09	0.0484527	2.05949	2.01104	6_preB_G1	4_proB_G1	NA
NIPSNAP3A	1	0	0	down	NA	2.30483e-24	0.137763	0.994097	0.856334	NA	-1.33005	0	1.33005	6_preB_G1	4_proB_G1	NA
TPM4	1	0	0	down	NA	3.21891e-13	0.136267	0.909091	0.772824	0.000717343	0.115265	1.66667	1.5514	6_preB_G1	4_proB_G1	NA
FXYD2	1	0	0	down	NA	4.13626e-09	0.136195	0.999606	0.863411	NA	-1.59067	0	1.59067	6_preB_G1	4_proB_G1	NA
PDIA6	1	0	0	down	NA	4.24344e-06	0.136184	0.820543	0.68436	0	0.31336	2.02412	1.71076	6_preB_G1	4_proB_G1	NA
CLEC11A	1	0	0	down	NA	8.04671e-30	0.136179	0.981897	0.845718	NA	0.281611	1.71739	1.43578	6_preB_G1	4_proB_G1	NA
VPS28	1	0	0	down	NA	0.000121539	0.135449	0.792208	0.656759	9.15066e-12	0.183009	1.8428	1.65979	6_preB_G1	4_proB_G1	NA
IRF1	1	0	0	down	NA	1.44977e-11	0.134609	0.818969	0.68436	9.41037e-13	0.245145	1.97609	1.73094	6_preB_G1	4_proB_G1	NA
TMBIM6	1	0	0	down	NA	1.26641e-07	0.134266	0.871704	0.737438	7.13766e-13	0.248144	1.77914	1.531	6_preB_G1	4_proB_G1	NA
CARHSP1	1	0	0	down	NA	3.84384e-07	0.134074	0.834711	0.700637	8.0238e-12	0.218659	1.83095	1.61229	6_preB_G1	4_proB_G1	NA
HNRNPH1	1	0	0	down	NA	3.93363e-05	0.133847	0.678079	0.544232	1.64574e-06	-0.0253762	2.45599	2.48137	6_preB_G1	4_proB_G1	NA
PSIP1	1	0	0	down	NA	1.51737e-13	0.133717	0.873278	0.739561	6.29153e-08	0.204969	1.9441	1.73913	6_preB_G1	4_proB_G1	NA
VPS26B	1	0	0	down	NA	7.1036e-20	0.133694	0.932704	0.799009	9.48147e-09	0.295878	1.63743	1.34155	6_preB_G1	4_proB_G1	NA
UBE2B	1	0	0	down	NA	1.48472e-08	0.133611	0.844156	0.710545	7.44234e-12	0.232508	1.85354	1.62103	6_preB_G1	4_proB_G1	NA
SPRY1	1	0	0	down	NA	1.63415e-22	0.13352	0.997639	0.864119	NA	-1.4375	0	1.4375	6_preB_G1	4_proB_G1	NA
PPIB	1	0	0	down	NA	0.00014366	0.132657	0.666273	0.533616	9.16848e-07	-0.0279869	2.19811	2.2261	6_preB_G1	4_proB_G1	NA
SKP1	1	0	0	down	NA	2.48155e-07	0.132078	0.386856	0.254777	3.79901e-09	-0.161716	2.39859	2.5603	6_preB_G1	4_proB_G1	NA
GSN	1	0	0	down	NA	2.18912e-24	0.131003	0.997245	0.866242	NA	-1.33862	0	1.33862	6_preB_G1	4_proB_G1	NA
GSTK1	1	0	0	down	NA	7.94183e-09	0.130969	0.877607	0.746638	6.64258e-15	0.320879	1.78457	1.46369	6_preB_G1	4_proB_G1	NA
PBXIP1	1	0	0	down	NA	1.79541e-08	0.130799	0.781189	0.650389	0	0.251078	1.85432	1.60324	6_preB_G1	4_proB_G1	NA
SSH2	1	0	0	down	NA	5.88999e-16	0.130585	0.887839	0.757254	1.27152e-06	0.198517	1.69123	1.49271	6_preB_G1	4_proB_G1	NA
PAFAH1B3	1	0	0	down	NA	2.92941e-19	0.130566	0.950807	0.820241	6.02241e-06	0.202488	1.608	1.40551	6_preB_G1	4_proB_G1	NA
HPCAL1	1	0	0	down	NA	4.7052e-22	0.130414	0.956316	0.825902	0.0103062	0.151725	1.51351	1.36179	6_preB_G1	4_proB_G1	NA
MME	1	0	0	down	NA	5.81984e-06	0.130355	0.643447	0.513093	4.90277e-11	0.0891537	2.03974	1.95058	6_preB_G1	4_proB_G1	NA
HSPB1	1	0	0	down	NA	1.82612e-29	0.129951	0.965762	0.83581	0.175576	0.617816	2.57471	1.9569	6_preB_G1	4_proB_G1	NA
ZNF428	1	0	0	down	NA	9.6984e-07	0.129933	0.779614	0.649682	0	0.348593	1.96071	1.61212	6_preB_G1	4_proB_G1	NA
SSBP1	1	0	0	down	NA	0.000383903	0.129335	0.812279	0.682944	7.33669e-10	0.196667	1.8239	1.62723	6_preB_G1	4_proB_G1	NA
TMEM256	1	0	0	down	NA	0.000104409	0.129222	0.776072	0.646851	2.77419e-15	0.242263	1.90158	1.65932	6_preB_G1	4_proB_G1	NA
SUPT4H1	1	0	0	down	NA	1.11083e-10	0.12905	0.844549	0.715499	3.13877e-10	0.20609	1.83544	1.62935	6_preB_G1	4_proB_G1	NA
CACYBP	1	0	0	down	NA	2.93806e-11	0.129035	0.911059	0.782024	2.50126e-10	0.308269	1.79204	1.48377	6_preB_G1	4_proB_G1	NA
NASP	1	0	0	down	NA	7.77118e-05	0.128273	0.854388	0.726115	1.95031e-08	0.192555	1.85405	1.6615	6_preB_G1	4_proB_G1	NA
BTG2	1	0	0	down	NA	7.50057e-08	0.127693	0.655647	0.527955	6.02819e-14	0.00805997	2.128	2.11994	6_preB_G1	4_proB_G1	NA
MDM4	1	0	0	down	NA	1.42075e-07	0.127559	0.513971	0.386412	9.54309e-14	0.0416196	2.67368	2.63206	6_preB_G1	4_proB_G1	NA
PFKL	1	0	0	down	NA	5.43874e-12	0.126987	0.908304	0.781316	7.30014e-08	0.176077	1.75536	1.57929	6_preB_G1	4_proB_G1	NA
LEF1	1	0	0	down	NA	1.7288e-08	0.126726	0.881149	0.754423	0.000240274	0.0644789	1.58609	1.52161	6_preB_G1	4_proB_G1	NA
ALDOA	1	0	0	down	NA	7.04903e-05	0.126698	0.768595	0.641897	1.3397e-07	0.0795959	1.92347	1.84387	6_preB_G1	4_proB_G1	NA
LST1	1	0	0	down	NA	4.26107e-32	0.126667	0.985832	0.859165	NA	0.227108	1.69444	1.46734	6_preB_G1	4_proB_G1	NA
CMPK1	1	0	0	down	NA	4.16408e-07	0.12653	0.756395	0.629866	0	0.315417	1.9483	1.63289	6_preB_G1	4_proB_G1	NA
PYCARD	1	0	0	down	NA	7.44389e-05	0.125849	0.868949	0.7431	1.14961e-09	0.306455	1.77477	1.46832	6_preB_G1	4_proB_G1	NA
C9orf89	1	0	0	down	NA	3.88375e-14	0.125241	0.890988	0.765747	8.86751e-09	0.226706	1.68592	1.45921	6_preB_G1	4_proB_G1	NA
FAIM3	1	0	0	down	NA	1.61701e-17	0.124666	0.948445	0.823779	5.5317e-06	0.25243	1.54962	1.29719	6_preB_G1	4_proB_G1	NA
ABRACL	1	0	0	down	NA	1.57782e-13	0.123268	0.966155	0.842887	0.047481	0.137754	1.51163	1.37387	6_preB_G1	4_proB_G1	NA
ZFP36L1	1	0	0	down	NA	3.80278e-10	0.122645	0.889807	0.767162	9.73282e-12	0.336854	1.85357	1.51672	6_preB_G1	4_proB_G1	NA
NRIP1	1	0	0	down	NA	5.3918e-18	0.122464	0.947658	0.825195	0.000158511	0.197224	1.64662	1.44939	6_preB_G1	4_proB_G1	NA
NENF	1	0	0	down	NA	2.76351e-26	0.122004	0.960645	0.838641	0.00746503	0.169298	1.7	1.5307	6_preB_G1	4_proB_G1	NA
CANX	1	0	0	down	NA	1.13219e-07	0.121517	0.861078	0.739561	1.19529e-06	0.161612	1.76487	1.60326	6_preB_G1	4_proB_G1	NA
THOC7	1	0	0	down	NA	0.00058133	0.121381	0.800079	0.678698	2.5118e-13	0.273631	1.86614	1.59251	6_preB_G1	4_proB_G1	NA
MTIF3	1	0	0	down	NA	2.46447e-09	0.121378	0.880756	0.759377	4.74147e-08	0.23476	1.77888	1.54412	6_preB_G1	4_proB_G1	NA
ACADM	1	0	0	down	NA	1.1803e-08	0.120704	0.916175	0.795471	7.26061e-07	0.267752	1.67606	1.4083	6_preB_G1	4_proB_G1	NA
CLN8	1	0	0	down	NA	2.36123e-19	0.120519	0.886265	0.765747	2.70506e-10	0.193552	1.69204	1.49849	6_preB_G1	4_proB_G1	NA
NUCKS1	1	0	0	down	NA	0.000117061	0.120511	0.794963	0.674452	3.94911e-09	0.106914	2.01344	1.90652	6_preB_G1	4_proB_G1	NA
PARVG	1	0	0	down	NA	4.86874e-15	0.120003	0.923259	0.803255	6.15815e-09	0.283232	1.70769	1.42446	6_preB_G1	4_proB_G1	NA
TMEM123	1	0	0	down	NA	0.000146446	0.119596	0.575364	0.455768	2.11042e-15	0.247695	2.30491	2.05722	6_preB_G1	4_proB_G1	NA
CDK6	1	0	0	down	NA	1.40078e-07	0.119573	0.883904	0.764331	2.91995e-08	0.162681	1.82034	1.65766	6_preB_G1	4_proB_G1	NA
MGMT	1	0	0	down	NA	6.62124e-08	0.119345	0.892168	0.772824	1.7092e-06	0.186791	1.59489	1.4081	6_preB_G1	4_proB_G1	NA
ADD3	1	0	0	down	NA	3.94876e-17	0.119008	0.951987	0.832979	1.07896e-05	0.269033	1.68852	1.41949	6_preB_G1	4_proB_G1	NA
ACSS1	1	0	0	down	NA	1.36791e-06	0.11899	0.850059	0.731069	3.66228e-07	0.192969	1.67192	1.47895	6_preB_G1	4_proB_G1	NA
STAG3	1	0	0	down	NA	8.49596e-29	0.118558	0.9756	0.857042	NA	-0.0247525	1.5	1.52475	6_preB_G1	4_proB_G1	NA
ST3GAL1	1	0	0	down	NA	5.68073e-30	0.118019	0.9878	0.869781	NA	0.227735	1.54839	1.32065	6_preB_G1	4_proB_G1	NA
NDUFAF6	1	0	0	down	NA	4.03068e-25	0.118006	0.973632	0.855626	NA	0.283509	1.61194	1.32843	6_preB_G1	4_proB_G1	NA
HMGA1	1	0	0	down	NA	0.00018633	0.117923	0.885085	0.767162	6.37064e-08	0.160459	1.83219	1.67173	6_preB_G1	4_proB_G1	NA
PLSCR1	1	0	0	down	NA	1.53323e-27	0.117153	0.986226	0.869073	NA	0.225483	1.57143	1.34595	6_preB_G1	4_proB_G1	NA
RNF43	1	0	0	down	NA	1.17057e-24	0.11706	0.971271	0.854211	0.233905	0.0817263	1.39726	1.31553	6_preB_G1	4_proB_G1	NA
LITAF	1	0	0	down	NA	4.22034e-08	0.117059	0.887052	0.769993	1.14267e-11	0.312978	1.80836	1.49538	6_preB_G1	4_proB_G1	NA
TSSC1	1	0	0	down	NA	4.64612e-07	0.11699	0.896891	0.779901	2.14993e-05	0.15007	1.62595	1.47588	6_preB_G1	4_proB_G1	NA
PRPF38B	1	0	0	down	NA	4.5934e-06	0.116886	0.702873	0.585987	7.41964e-16	0.18517	2.00397	1.8188	6_preB_G1	4_proB_G1	NA
JUN	1	1	0	down	down	3.49581e-25	0.115848	0.436442	0.320594	0	-1.17662	2.64525	3.82187	6_preB_G1	4_proB_G1	NA
MICU2	1	0	0	down	NA	1.50199e-16	0.115833	0.920504	0.804671	1.52057e-06	0.207203	1.67822	1.47101	6_preB_G1	4_proB_G1	NA
ENO1	1	0	0	down	NA	4.39608e-09	0.11545	0.681621	0.566171	0.378678	-0.03111	1.66873	1.69984	6_preB_G1	4_proB_G1	NA
OCIAD1	1	0	0	down	NA	0.000582231	0.115412	0.807556	0.692144	0	0.363641	1.88548	1.52184	6_preB_G1	4_proB_G1	NA
CD27	1	0	0	down	NA	7.33186e-21	0.115354	0.996458	0.881104	NA	-1.3869	0	1.3869	6_preB_G1	4_proB_G1	NA
MYL6B	1	0	0	down	NA	0.000528947	0.115028	0.817788	0.70276	1.21204e-13	0.304392	1.77106	1.46667	6_preB_G1	4_proB_G1	NA
KRTCAP2	1	0	0	down	NA	8.77482e-08	0.114305	0.884298	0.769993	2.29762e-10	0.195259	1.72449	1.52923	6_preB_G1	4_proB_G1	NA
CFDP1	1	0	0	down	NA	2.72409e-12	0.113478	0.925226	0.811748	4.64816e-10	0.356391	1.8	1.44361	6_preB_G1	4_proB_G1	NA
ANP32B	1	0	0	down	NA	4.54896e-05	0.113152	0.746556	0.633404	0.195392	-0.020564	1.83851	1.85907	6_preB_G1	4_proB_G1	NA
ETS2	1	0	0	down	NA	2.74482e-17	0.112959	0.958678	0.845718	0.00487997	0.216426	1.64762	1.43119	6_preB_G1	4_proB_G1	NA
TMEM219	1	0	0	down	NA	1.89922e-11	0.112519	0.908697	0.796178	2.88252e-06	0.186303	1.67241	1.48611	6_preB_G1	4_proB_G1	NA
MND1	1	0	0	down	NA	6.34333e-19	0.11211	0.974813	0.862703	NA	0.0607281	1.39062	1.3299	6_preB_G1	4_proB_G1	NA
LAIR1	1	0	0	down	NA	1.23897e-12	0.111745	0.922078	0.810333	0.00316426	0.12468	1.5202	1.39552	6_preB_G1	4_proB_G1	NA
INTS3	1	0	0	down	NA	3.92198e-32	0.111574	0.990555	0.878981	NA	-1.35088	0	1.35088	6_preB_G1	4_proB_G1	NA
RP1-3J17.3	1	0	0	down	NA	2.4559e-16	0.111124	0.929949	0.818825	0.00615046	0.153924	1.73596	1.58203	6_preB_G1	4_proB_G1	NA
FOXN3	1	0	0	down	NA	4.67494e-13	0.11073	0.929555	0.818825	1.43607e-08	0.276907	1.60894	1.33203	6_preB_G1	4_proB_G1	NA
ANXA7	1	0	0	down	NA	3.33999e-08	0.110644	0.921684	0.81104	2.59747e-07	0.262379	1.63317	1.37079	6_preB_G1	4_proB_G1	NA
JAK1	1	0	0	down	NA	0.000102193	0.109075	0.758756	0.649682	0	0.29954	1.97227	1.67273	6_preB_G1	4_proB_G1	NA
C4orf32	1	0	0	down	NA	2.04649e-18	0.108875	0.963794	0.854919	0.338654	0.0731177	1.38043	1.30732	6_preB_G1	4_proB_G1	NA
HNRNPUL1	1	0	0	down	NA	1.66729e-08	0.108871	0.876033	0.767162	1.32828e-07	0.176967	1.73016	1.55319	6_preB_G1	4_proB_G1	NA
PPP1R15A	1	0	0	down	NA	1.11862e-08	0.108417	0.811885	0.703468	6.73645e-12	0.24135	2.16736	1.92601	6_preB_G1	4_proB_G1	NA
SNORA76	1	0	0	down	NA	0.000884562	0.10819	0.904368	0.796178	0.00210962	0.100437	1.68724	1.58681	6_preB_G1	4_proB_G1	NA
BST2	1	0	0	down	NA	1.49869e-07	0.108087	0.878788	0.770701	2.73265e-12	0.280022	1.79545	1.51543	6_preB_G1	4_proB_G1	NA
CBX5	1	0	0	down	NA	3.43667e-14	0.10785	0.960645	0.852795	0.0107391	0.161731	1.58	1.41827	6_preB_G1	4_proB_G1	NA
IMPDH1	1	0	0	down	NA	9.99138e-21	0.107017	0.99449	0.887473	NA	-1.21384	0	1.21384	6_preB_G1	4_proB_G1	NA
SH2D4B	1	0	0	down	NA	1.45452e-23	0.107014	0.990948	0.883935	NA	-1.36585	0	1.36585	6_preB_G1	4_proB_G1	NA
UPF2	1	0	0	down	NA	1.34988e-07	0.106308	0.826053	0.719745	0	0.278863	1.81674	1.53788	6_preB_G1	4_proB_G1	NA
ADPRM	1	0	0	down	NA	4.49457e-14	0.106266	0.948445	0.84218	0.0370397	0.100127	1.42748	1.32735	6_preB_G1	4_proB_G1	NA
FHL1	1	0	0	down	NA	2.01423e-24	0.10615	0.992916	0.886766	NA	-1.375	0	1.375	6_preB_G1	4_proB_G1	NA
ADI1	1	0	0	down	NA	1.71386e-05	0.105687	0.918142	0.812456	0.000105655	0.146535	1.71635	1.56981	6_preB_G1	4_proB_G1	NA
SMAD1	1	0	0	down	NA	7.88583e-17	0.105528	0.916568	0.81104	0.000472648	0.153364	1.59906	1.44569	6_preB_G1	4_proB_G1	NA
ID2	1	0	0	down	NA	1.31637e-12	0.105393	0.939787	0.834395	0.00209093	0.16541	1.82353	1.65812	6_preB_G1	4_proB_G1	NA
KMT2A	1	0	0	down	NA	2.15787e-13	0.105062	0.922471	0.81741	1.25038e-05	0.20401	1.64975	1.44574	6_preB_G1	4_proB_G1	NA
ALOX5AP	1	0	0	down	NA	4.34958e-21	0.104956	0.977568	0.872611	NA	0.279825	1.59649	1.31667	6_preB_G1	4_proB_G1	NA
PDIA3	1	0	0	down	NA	3.357e-06	0.104786	0.79693	0.692144	4.88761e-12	0.228214	2.02132	1.7931	6_preB_G1	4_proB_G1	NA
UBL3	1	0	0	down	NA	8.172e-25	0.104718	0.975207	0.870488	NA	0.0307052	1.39683	1.36612	6_preB_G1	4_proB_G1	NA
RANBP1	1	0	0	down	NA	0.000140209	0.104211	0.854388	0.750177	1.94665e-08	0.251405	1.8973	1.64589	6_preB_G1	4_proB_G1	NA
CKLF	1	0	0	down	NA	9.07052e-22	0.103948	0.992129	0.888181	NA	-1.38608	0	1.38608	6_preB_G1	4_proB_G1	NA
P2RY14	1	0	0	down	NA	6.15008e-16	0.103561	0.998819	0.895258	NA	-1.80405	0	1.80405	6_preB_G1	4_proB_G1	NA
ARHGAP27	1	0	0	down	NA	3.8059e-27	0.103548	0.984652	0.881104	NA	0.0970696	1.35897	1.2619	6_preB_G1	4_proB_G1	NA
SCCPDH	1	0	0	down	NA	3.97652e-16	0.103065	0.972845	0.869781	NA	0.0525362	1.4058	1.35326	6_preB_G1	4_proB_G1	NA
TOPORS	1	0	0	down	NA	8.68359e-14	0.103031	0.937426	0.834395	0.000273862	0.170376	1.58491	1.41453	6_preB_G1	4_proB_G1	NA
NINJ1	1	0	0	down	NA	1.72515e-13	0.102783	0.924439	0.821656	5.35105e-06	0.24752	1.65625	1.40873	6_preB_G1	4_proB_G1	NA
MAGED1	1	0	0	down	NA	5.20186e-06	0.102228	0.91893	0.816702	0.000160083	0.196855	1.49029	1.29344	6_preB_G1	4_proB_G1	NA
PSAP	1	0	0	down	NA	9.75597e-06	0.102187	0.876427	0.774239	8.0744e-10	0.218527	1.74204	1.52351	6_preB_G1	4_proB_G1	NA
MGST2	1	0	0	down	NA	7.08313e-17	0.101725	0.970091	0.868365	1.56265e-05	0.346067	1.65789	1.31183	6_preB_G1	4_proB_G1	NA
CHD1	1	0	0	down	NA	3.00036e-10	0.101292	0.927194	0.825902	1.38296e-07	0.289629	1.62703	1.3374	6_preB_G1	4_proB_G1	NA
FERMT3	1	0	0	down	NA	8.91652e-08	0.100657	0.920897	0.820241	0.0029765	0.114839	1.60697	1.49213	6_preB_G1	4_proB_G1	NA
EBPL	1	0	0	down	NA	2.19721e-05	0.100236	0.892168	0.791932	2.77224e-10	0.315209	1.73358	1.41837	6_preB_G1	4_proB_G1	NA
AK3	1	0	0	down	NA	5.9918e-07	0.100184	0.919717	0.819533	0.00489434	0.0833333	1.57353	1.4902	6_preB_G1	4_proB_G1	NA
ARPC3	0	1	1	NA	up	2.99747e-12	-0.086311	0.0318772	0.118188	4.56817e-11	1.81689	4.43005	2.61316	6_preB_G1	4_proB_G1	up
RCSD1	0	1	1	NA	up	1.34102e-09	-0.0347858	0.135773	0.170559	1.01368e-12	2.16682	5.49446	3.32765	6_preB_G1	4_proB_G1	up
DDX5	0	0	1	NA	NA	0.0556228	-0.0105129	0.0255805	0.0360934	1.5943e-08	0.817678	4.85219	4.03451	6_preB_G1	4_proB_G1	up
ATP5G2	0	1	1	NA	down	0.547267	-0.0146832	0.0228257	0.0375088	0	-1.74589	2.91341	4.6593	6_preB_G1	4_proB_G1	down
RPS26	0	1	1	NA	down	3.99773e-06	-0.0593385	0.0326643	0.0920028	3.36649e-12	-1.75624	6.04882	7.80506	6_preB_G1	4_proB_G1	down
VPREB3	0	1	1	NA	down	3.84557e-05	0.041964	0.0547029	0.0127389	0	-3.39712	6.61148	10.0086	6_preB_G1	4_proB_G1	up
MALAT1	0	1	0	NA	up	NA	0	0	0	6.25922e-10	14.5436	170.612	156.068	6_preB_G1	4_proB_G1	NA
PTMA	0	1	0	NA	up	NA	0	0	0	0	8.5451	39.3384	30.7933	6_preB_G1	4_proB_G1	NA
CD79B	0	1	0	NA	up	0.0700471	-0.00463649	0.00314837	0.00778485	0	5.35836	15.6415	10.2832	6_preB_G1	4_proB_G1	NA
RPS27	0	1	0	NA	up	NA	0	0	0	0	4.89697	39.5679	34.6709	6_preB_G1	4_proB_G1	NA
H3F3B	0	1	0	NA	up	0.446644	7.93776e-05	0.000787092	0.000707714	0	4.36418	18.7664	14.4023	6_preB_G1	4_proB_G1	NA
BTG1	0	1	0	NA	up	1.00804e-14	-0.0678578	0.004329	0.0721868	0	4.04541	8.29407	4.24867	6_preB_G1	4_proB_G1	NA
FAU	0	1	0	NA	up	NA	0	0	0	0	3.62173	13.1263	9.5046	6_preB_G1	4_proB_G1	NA
MT-ND2	0	1	0	NA	up	0.51935	0.000393546	0.000393546	0	0	3.59748	10.5366	6.93914	6_preB_G1	4_proB_G1	NA
HLA-B	0	1	0	NA	up	0.778822	7.93776e-05	0.000787092	0.000707714	0	2.69013	11.1682	8.47805	6_preB_G1	4_proB_G1	NA
RPS24	0	1	0	NA	up	NA	0	0	0	0	2.12877	17.7119	15.5832	6_preB_G1	4_proB_G1	NA
RPS16	0	1	0	NA	up	NA	0	0	0	0	2.11367	14.2149	12.1012	6_preB_G1	4_proB_G1	NA
RPL10	0	1	0	NA	up	NA	0	0	0	0.000263823	1.83015	44.4211	42.5909	6_preB_G1	4_proB_G1	NA
H3F3A	0	1	0	NA	up	0.532131	-0.00212314	0	0.00212314	0	1.73847	10.3853	8.64681	6_preB_G1	4_proB_G1	NA
SLC25A6	0	1	0	NA	up	0.0680884	-0.0216216	0.00314837	0.02477	0	1.71685	5.50059	3.78374	6_preB_G1	4_proB_G1	NA
MT-CO2	0	1	0	NA	up	NA	0	0	0	3.92531e-10	1.54173	14.4278	12.8861	6_preB_G1	4_proB_G1	NA
RPS11	0	1	0	NA	up	NA	0	0	0	1.32146e-13	1.52677	14.3322	12.8054	6_preB_G1	4_proB_G1	NA
RPL37	0	1	0	NA	up	NA	0	0	0	1.44574e-15	1.52375	14.4601	12.9363	6_preB_G1	4_proB_G1	NA
MT-CO1	0	1	0	NA	up	NA	0	0	0	2.26024e-06	1.4524	17.4262	15.9738	6_preB_G1	4_proB_G1	NA
MT-ND3	0	1	0	NA	up	0.708172	-0.00212314	0	0.00212314	0	1.44368	9.18339	7.73972	6_preB_G1	4_proB_G1	NA
RPL6	0	1	0	NA	up	NA	0	0	0	5.3961e-15	1.41149	11.9961	10.5846	6_preB_G1	4_proB_G1	NA
RPL26	0	1	0	NA	up	NA	0	0	0	1.34036e-10	1.35773	20.0209	18.6631	6_preB_G1	4_proB_G1	NA
EIF1	0	1	0	NA	up	0.772834	-0.000707714	0	0.000707714	6.31599e-08	1.30519	11.1267	9.82153	6_preB_G1	4_proB_G1	NA
TMSB10	0	1	0	NA	up	0.714259	0.000393546	0.000393546	0	0.000107119	1.25505	19.2055	17.9505	6_preB_G1	4_proB_G1	NA
GLTSCR2	0	1	0	NA	up	0.00770043	-0.0319992	0.00550964	0.0375088	0	1.22442	4.58251	3.35809	6_preB_G1	4_proB_G1	NA
HNRNPA1	0	1	0	NA	up	NA	0	0	0	1.61087e-13	1.21979	10.3408	9.12102	6_preB_G1	4_proB_G1	NA
RPL12	0	1	0	NA	up	NA	0	0	0	3.01248e-12	1.19849	11.0209	9.82236	6_preB_G1	4_proB_G1	NA
EEF1D	0	1	0	NA	up	0.470034	-0.010457	0.00157418	0.0120311	0	1.16886	5.50769	4.33883	6_preB_G1	4_proB_G1	NA
RPL8	0	1	0	NA	up	NA	0	0	0	1.21781e-13	1.15751	10.2566	9.09908	6_preB_G1	4_proB_G1	NA
MT-ND4	0	1	0	NA	up	NA	0	0	0	3.5653e-10	1.13425	11.4364	10.3022	6_preB_G1	4_proB_G1	NA
RPLP2	0	1	0	NA	up	NA	0	0	0	0.000436386	1.0319	21.7269	20.695	6_preB_G1	4_proB_G1	NA
HIST1H2BK	0	1	0	NA	up	0.0497369	0.00640118	0.533648	0.527247	0	1.01017	3.11646	2.10629	6_preB_G1	4_proB_G1	NA
HMGB2	0	1	0	NA	down	6.36973e-08	0.017489	0.117277	0.0997877	0	-1.00425	2.61525	3.6195	6_preB_G1	4_proB_G1	NA
RPLP0	0	1	0	NA	down	NA	0	0	0	4.17584e-12	-1.02514	7.1893	8.21444	6_preB_G1	4_proB_G1	NA
UBA52	0	1	0	NA	down	NA	0	0	0	0	-1.03863	7.22393	8.26256	6_preB_G1	4_proB_G1	NA
RPL28	0	1	0	NA	down	NA	0	0	0	3.519e-07	-1.10243	16.1141	17.2166	6_preB_G1	4_proB_G1	NA
RPS15	0	1	0	NA	down	NA	0	0	0	9.71765e-15	-1.21238	15.3503	16.5626	6_preB_G1	4_proB_G1	NA
RPS3A	0	1	0	NA	down	NA	0	0	0	1.86045e-06	-1.23782	20.8068	22.0446	6_preB_G1	4_proB_G1	NA
RPS2	0	1	0	NA	down	NA	0	0	0	3.93816e-07	-1.25944	15.645	16.9045	6_preB_G1	4_proB_G1	NA
RPS21	0	1	0	NA	down	0.827336	-0.000707714	0	0.000707714	0	-1.28697	5.39787	6.68484	6_preB_G1	4_proB_G1	NA
BTF3	0	1	0	NA	down	0.587725	0.000472923	0.00118064	0.000707714	0	-1.33819	5.34594	6.68414	6_preB_G1	4_proB_G1	NA
HMGB1	0	1	0	NA	down	0.366276	-0.00141209	0.00354191	0.004954	0	-1.4108	4.37796	5.78876	6_preB_G1	4_proB_G1	NA
RPL23A	0	1	0	NA	down	NA	0	0	0	6.83496e-12	-1.48043	16.9449	18.4253	6_preB_G1	4_proB_G1	NA
NACA	0	1	0	NA	down	0.747074	0.000393546	0.000393546	0	0	-1.4869	6.70984	8.19674	6_preB_G1	4_proB_G1	NA
RPL7	0	1	0	NA	down	NA	0	0	0	3.15433e-12	-1.48735	16.3605	17.8478	6_preB_G1	4_proB_G1	NA
HLA-A	0	1	0	NA	down	0.0309065	0.00149815	0.004329	0.00283086	0	-1.54422	6.79644	8.34067	6_preB_G1	4_proB_G1	NA
RPL36	0	1	0	NA	down	NA	0	0	0	0	-1.57471	8.69776	10.2725	6_preB_G1	4_proB_G1	NA
RPS7	0	1	0	NA	down	NA	0	0	0	0	-1.59636	12.5884	14.1847	6_preB_G1	4_proB_G1	NA
RPL13	0	1	0	NA	down	NA	0	0	0	2.09185e-07	-1.59678	22.2298	23.8266	6_preB_G1	4_proB_G1	NA
RPL15	0	1	0	NA	down	NA	0	0	0	1.49832e-10	-1.62222	20.6899	22.3121	6_preB_G1	4_proB_G1	NA
HLA-DPB1	0	1	0	NA	down	0.0169644	-0.000462897	0.0094451	0.009908	0	-1.68115	4.10727	5.78842	6_preB_G1	4_proB_G1	NA
RPS13	0	1	0	NA	down	NA	0	0	0	0	-1.69502	13.954	15.649	6_preB_G1	4_proB_G1	NA
RPS3	0	1	0	NA	down	NA	0	0	0	1.44251e-14	-1.70832	15.608	17.3163	6_preB_G1	4_proB_G1	NA
RPLP1	0	1	0	NA	down	NA	0	0	0	3.10475e-07	-1.75546	19.5687	21.3241	6_preB_G1	4_proB_G1	NA
RPS12	0	1	0	NA	down	NA	0	0	0	8.11723e-09	-1.82438	20.6116	22.436	6_preB_G1	4_proB_G1	NA
ARHGDIB	0	1	0	NA	down	0.00193756	0.0114229	0.0220386	0.0106157	0	-1.97816	2.85231	4.83047	6_preB_G1	4_proB_G1	NA
RPL31	0	1	0	NA	down	NA	0	0	0	0	-2.0985	13.5356	15.6341	6_preB_G1	4_proB_G1	NA
RPL19	0	1	0	NA	down	NA	0	0	0	0	-2.18328	19.0213	21.2045	6_preB_G1	4_proB_G1	NA
RPS19	0	1	0	NA	down	NA	0	0	0	0	-2.30912	22.5805	24.8896	6_preB_G1	4_proB_G1	NA
RPL3	0	1	0	NA	down	NA	0	0	0	0	-2.4472	15.6604	18.1076	6_preB_G1	4_proB_G1	NA
RPL34	0	1	0	NA	down	NA	0	0	0	2.14384e-14	-2.50272	26.4116	28.9144	6_preB_G1	4_proB_G1	NA
LAPTM5	0	1	0	NA	down	0.152142	0.00204711	0.00275482	0.000707714	0	-2.70682	5.65154	8.35836	6_preB_G1	4_proB_G1	NA
RPS8	0	1	0	NA	down	NA	0	0	0	0	-2.71999	18.0712	20.7912	6_preB_G1	4_proB_G1	NA
RPL35A	0	1	0	NA	down	NA	0	0	0	0	-3.04356	14.5014	17.5449	6_preB_G1	4_proB_G1	NA
HLA-DRA	0	1	0	NA	down	NA	0	0	0	0	-3.10968	17.6037	20.7134	6_preB_G1	4_proB_G1	NA
RPS18	0	1	0	NA	down	NA	0	0	0	0	-3.22123	19.466	22.6872	6_preB_G1	4_proB_G1	NA
RPS14	0	1	0	NA	down	NA	0	0	0	0	-3.44274	14.6344	18.0771	6_preB_G1	4_proB_G1	NA
RPL41	0	1	0	NA	down	NA	0	0	0	0	-3.64788	24.3266	27.9745	6_preB_G1	4_proB_G1	NA
RPS29	0	1	0	NA	down	NA	0	0	0	0	-3.88333	13.8095	17.6929	6_preB_G1	4_proB_G1	NA
GAPDH	0	1	0	NA	down	1.22037e-13	0.0230671	0.0287288	0.00566171	0	-4.55888	1.82618	6.38505	6_preB_G1	4_proB_G1	NA
RPL39	0	1	0	NA	down	NA	0	0	0	0	-4.72428	20.4427	25.167	6_preB_G1	4_proB_G1	NA
CD74	0	1	0	NA	down	0.714259	0.000393546	0.000393546	0	0	-4.76806	21.3268	26.0948	6_preB_G1	4_proB_G1	NA
RPS15A	0	1	0	NA	down	NA	0	0	0	0	-5.17026	20.1539	25.3241	6_preB_G1	4_proB_G1	NA
TPT1	0	1	0	NA	down	NA	0	0	0	0	-6.8844	12.669	19.5534	6_preB_G1	4_proB_G1	NA
TMSB4X	0	1	0	NA	down	0.759157	0.000393546	0.000393546	0	0	-10.6855	13.1496	23.8351	6_preB_G1	4_proB_G1	NA
SNHG7	1	1	1	up	up	3.27698e-92	-0.314815	0.208186	0.523001	0	3.3559	5.97756	2.62166	6_preB_G1	4_proB_G1	up
HLA-E	1	1	1	up	up	4.39432e-25	-0.123085	0.0602125	0.183298	1.82744e-13	1.85891	4.94729	3.08839	6_preB_G1	4_proB_G1	up
MFNG	1	0	0	up	NA	9.40329e-17	-0.100997	0.802046	0.903043	1.74221e-14	0.564888	1.85686	1.29197	6_preB_G1	4_proB_G1	NA
KIAA0922	1	0	0	up	NA	8.25892e-22	-0.101201	0.835104	0.936306	5.42054e-10	0.5048	1.68258	1.17778	6_preB_G1	4_proB_G1	NA
MTPN	1	0	0	up	NA	1.30691e-26	-0.102043	0.693428	0.795471	0	0.472041	2.02567	1.55363	6_preB_G1	4_proB_G1	NA
STRBP	1	0	0	up	NA	2.16155e-19	-0.102111	0.787485	0.889597	2.11042e-15	0.498433	1.85741	1.35897	6_preB_G1	4_proB_G1	NA
BLK	1	0	0	up	NA	1.32594e-22	-0.102309	0.827627	0.929936	9.04322e-11	0.501245	1.77397	1.27273	6_preB_G1	4_proB_G1	NA
RHBDF2	1	0	0	up	NA	2.53263e-21	-0.102501	0.874852	0.977353	NA	0.441824	1.69182	1.25	6_preB_G1	4_proB_G1	NA
GCHFR	1	0	0	up	NA	6.05014e-22	-0.10335	0.890988	0.994338	NA	1.72563	1.72563	0	6_preB_G1	4_proB_G1	NA
GRN	1	0	0	up	NA	1.61927e-23	-0.103757	0.876427	0.980184	NA	1.76433	1.76433	0	6_preB_G1	4_proB_G1	NA
PPM1K	1	0	0	up	NA	3.05254e-18	-0.103762	0.788666	0.892427	0	0.504325	1.83985	1.33553	6_preB_G1	4_proB_G1	NA
RBM3	1	0	0	up	NA	2.16997e-08	-0.104711	0.116096	0.220807	2.65244e-08	0.286228	2.97106	2.68483	6_preB_G1	4_proB_G1	NA
DNMT3B	1	0	0	up	NA	1.50834e-16	-0.104928	0.885872	0.9908	NA	1.65172	1.65172	0	6_preB_G1	4_proB_G1	NA
SYF2	1	0	0	up	NA	1.33919e-19	-0.105303	0.404959	0.510262	0	0.562961	2.63955	2.07659	6_preB_G1	4_proB_G1	NA
TBC1D1	1	0	0	up	NA	8.87751e-22	-0.105312	0.811885	0.917197	4.89968e-11	0.479813	1.74477	1.26496	6_preB_G1	4_proB_G1	NA
FAM173A	1	0	0	up	NA	1.95852e-23	-0.105484	0.880362	0.985846	NA	1.66447	1.66447	0	6_preB_G1	4_proB_G1	NA
CEBPD	1	0	0	up	NA	5.83849e-07	-0.106337	0.892956	0.999292	NA	1.75	1.75	0	6_preB_G1	4_proB_G1	NA
PIM2	1	0	0	up	NA	2.62534e-21	-0.106443	0.863833	0.970276	NA	0.381365	1.78613	1.40476	6_preB_G1	4_proB_G1	NA
TP53I13	1	0	0	up	NA	9.58882e-19	-0.1065	0.803621	0.91012	6.69474e-08	0.414782	1.74549	1.33071	6_preB_G1	4_proB_G1	NA
HMGN2	1	0	0	up	NA	3.69755e-11	-0.106686	0.0228257	0.129512	2.09057e-07	0.225839	3.06242	2.83659	6_preB_G1	4_proB_G1	NA
PRKCB	1	0	0	up	NA	1.10431e-14	-0.107728	0.668634	0.776362	0	0.557857	2.13064	1.57278	6_preB_G1	4_proB_G1	NA
CD52	1	0	0	up	NA	0.000426909	-0.1078	0.0924833	0.200283	0.0069072	0.345695	2.58109	2.2354	6_preB_G1	4_proB_G1	NA
SP100	1	0	0	up	NA	1.00596e-19	-0.108018	0.77804	0.886058	0	0.524492	1.89716	1.37267	6_preB_G1	4_proB_G1	NA
RELB	1	0	0	up	NA	5.25972e-19	-0.108397	0.876033	0.98443	NA	1.80317	1.80317	0	6_preB_G1	4_proB_G1	NA
STX7	1	0	0	up	NA	7.15255e-17	-0.109056	0.760724	0.869781	2.18352e-13	0.462028	1.94572	1.4837	6_preB_G1	4_proB_G1	NA
GLUL	1	0	0	up	NA	4.14851e-23	-0.109758	0.683589	0.793347	0	0.545066	2.06219	1.51712	6_preB_G1	4_proB_G1	NA
RP11-164H13.1	1	0	0	up	NA	1.15682e-21	-0.109965	0.881543	0.991507	NA	2.01993	2.01993	0	6_preB_G1	4_proB_G1	NA
KLF2	1	0	0	up	NA	5.78586e-23	-0.110061	0.863046	0.973107	NA	0.263007	1.84195	1.57895	6_preB_G1	4_proB_G1	NA
RGS19	1	0	0	up	NA	2.11783e-31	-0.11029	0.787092	0.897381	1.14908e-14	0.535522	1.88725	1.35172	6_preB_G1	4_proB_G1	NA
C12orf75	1	0	0	up	NA	6.30977e-27	-0.111572	0.844549	0.956122	NA	0.378399	1.74937	1.37097	6_preB_G1	4_proB_G1	NA
RP11-1070N10.3	1	0	0	up	NA	5.54181e-25	-0.111704	0.871311	0.983015	NA	1.66667	1.66667	0	6_preB_G1	4_proB_G1	NA
IFNGR2	1	0	0	up	NA	5.69365e-25	-0.113768	0.850846	0.964614	NA	0.47657	1.69657	1.22	6_preB_G1	4_proB_G1	NA
HSH2D	1	0	0	up	NA	6.44796e-28	-0.11401	0.844943	0.958953	NA	0.474882	1.7335	1.25862	6_preB_G1	4_proB_G1	NA
MYL4	1	0	0	up	NA	2.28421e-15	-0.114446	0.882723	0.997169	NA	1.78859	1.78859	0	6_preB_G1	4_proB_G1	NA
YPEL5	1	0	0	up	NA	6.27666e-18	-0.117947	0.339237	0.457183	0	0.553128	2.80345	2.25033	6_preB_G1	4_proB_G1	NA
IFNAR2	1	0	0	up	NA	2.71331e-27	-0.118749	0.822511	0.94126	1.49441e-09	0.495178	1.73614	1.24096	6_preB_G1	4_proB_G1	NA
OGFRL1	1	0	0	up	NA	1.62121e-20	-0.119546	0.811098	0.930644	1.32251e-12	0.530315	1.78542	1.2551	6_preB_G1	4_proB_G1	NA
CYB5R4	1	0	0	up	NA	5.98193e-24	-0.119755	0.756395	0.87615	0	0.596861	1.91115	1.31429	6_preB_G1	4_proB_G1	NA
SP110	1	0	0	up	NA	4.394e-27	-0.120133	0.689492	0.809625	0	0.597759	2.07731	1.47955	6_preB_G1	4_proB_G1	NA
PIM1	1	0	0	up	NA	2.50547e-20	-0.120234	0.832349	0.952583	NA	0.552589	1.9108	1.35821	6_preB_G1	4_proB_G1	NA
CAMK2D	1	0	0	up	NA	3.36214e-24	-0.121536	0.868556	0.990092	NA	1.63174	1.63174	0	6_preB_G1	4_proB_G1	NA
FAM65B	1	0	0	up	NA	3.72403e-26	-0.121637	0.762298	0.883935	0	0.576967	1.89404	1.31707	6_preB_G1	4_proB_G1	NA
HIP1	1	0	0	up	NA	5.81218e-26	-0.122975	0.843762	0.966737	NA	0.421995	1.63476	1.21277	6_preB_G1	4_proB_G1	NA
ANXA2	1	0	0	up	NA	8.64504e-31	-0.124536	0.856356	0.980892	NA	1.73425	1.73425	0	6_preB_G1	4_proB_G1	NA
REXO2	1	0	0	up	NA	2.13093e-12	-0.126113	0.517906	0.64402	0	0.856638	2.74531	1.88867	6_preB_G1	4_proB_G1	NA
PAX5	1	0	0	up	NA	9.61968e-28	-0.126643	0.789847	0.91649	7.2578e-15	0.53593	1.80712	1.27119	6_preB_G1	4_proB_G1	NA
GAS7	1	0	0	up	NA	1.64493e-27	-0.128075	0.856356	0.98443	NA	1.5589	1.5589	0	6_preB_G1	4_proB_G1	NA
MTSS1	1	0	0	up	NA	4.25718e-14	-0.128613	0.868556	0.997169	NA	1.72156	1.72156	0	6_preB_G1	4_proB_G1	NA
PPP1R2	1	0	0	up	NA	1.51123e-20	-0.128996	0.629673	0.758669	0	0.508447	2.0627	1.55425	6_preB_G1	4_proB_G1	NA
IGJ	1	0	0	up	NA	1.71648e-33	-0.130218	0.835104	0.965322	NA	-0.41659	2.60382	3.02041	6_preB_G1	4_proB_G1	NA
VIM	1	0	0	up	NA	6.01031e-07	-0.13048	0.390397	0.520878	4.94919e-07	-0.195203	1.85797	2.05318	6_preB_G1	4_proB_G1	NA
ZNF106	1	0	0	up	NA	1.05526e-26	-0.131984	0.796537	0.928521	0	0.611276	1.8588	1.24752	6_preB_G1	4_proB_G1	NA
TOX2	1	0	0	up	NA	1.01218e-10	-0.132784	0.865801	0.998585	NA	1.90323	1.90323	0	6_preB_G1	4_proB_G1	NA
TERF1	1	0	0	up	NA	4.72705e-31	-0.133608	0.741834	0.875442	0	0.599778	1.96341	1.36364	6_preB_G1	4_proB_G1	NA
SLC25A5	1	0	0	up	NA	3.71872e-20	-0.134853	0.255805	0.390658	4.53845e-08	0.386487	2.58858	2.20209	6_preB_G1	4_proB_G1	NA
ZFP36	1	0	0	up	NA	9.84769e-27	-0.1359	0.729634	0.865534	0	0.55968	2.05968	1.5	6_preB_G1	4_proB_G1	NA
PRDX2	1	0	0	up	NA	1.129e-30	-0.136218	0.726486	0.862703	7.41964e-16	0.505281	2.0259	1.52062	6_preB_G1	4_proB_G1	NA
NFKBID	1	0	0	up	NA	1.25294e-22	-0.136908	0.828414	0.965322	NA	0.455626	1.98624	1.53061	6_preB_G1	4_proB_G1	NA
OCIAD2	1	0	0	up	NA	9.03024e-31	-0.13709	0.802046	0.939137	5.95329e-09	0.397591	1.78131	1.38372	6_preB_G1	4_proB_G1	NA
IFT57	1	0	0	up	NA	3.66605e-24	-0.137252	0.79693	0.934183	0	0.775069	2.01163	1.23656	6_preB_G1	4_proB_G1	NA
RNGTT	1	0	0	up	NA	6.13674e-22	-0.138465	0.844549	0.983015	NA	2.11899	2.11899	0	6_preB_G1	4_proB_G1	NA
HIST1H2AC	1	1	0	up	up	1.50865e-07	-0.138542	0.513971	0.652512	0	1.48664	3.48664	2	6_preB_G1	4_proB_G1	NA
MYO1C	1	0	0	up	NA	1.41369e-10	-0.138687	0.859898	0.998585	NA	1.86517	1.86517	0	6_preB_G1	4_proB_G1	NA
ITGAE	1	0	0	up	NA	6.64567e-29	-0.138913	0.703266	0.84218	0	0.485381	1.95623	1.47085	6_preB_G1	4_proB_G1	NA
CORO1A	1	0	0	up	NA	4.85939e-33	-0.142103	0.573396	0.715499	7.1259e-12	0.337069	2.1107	1.77363	6_preB_G1	4_proB_G1	NA
TAGLN2	1	0	0	up	NA	6.44796e-28	-0.148061	0.675718	0.823779	1.31797e-09	0.539108	2.35437	1.81526	6_preB_G1	4_proB_G1	NA
ODC1	1	0	0	up	NA	2.20949e-30	-0.148821	0.703266	0.852088	0	0.677224	2.16048	1.48325	6_preB_G1	4_proB_G1	NA
ATP8A1	1	0	0	up	NA	5.70773e-29	-0.151268	0.777253	0.928521	1.06247e-10	0.456688	1.74382	1.28713	6_preB_G1	4_proB_G1	NA
HIST2H2AA3	1	1	0	up	up	2.78049e-18	-0.151636	0.636757	0.788393	0	1.07381	2.79957	1.72575	6_preB_G1	4_proB_G1	NA
DTX1	1	0	0	up	NA	1.27746e-31	-0.152587	0.79575	0.948337	2.88222e-11	0.56394	1.72832	1.16438	6_preB_G1	4_proB_G1	NA
CCDC85B	1	0	0	up	NA	4.13166e-29	-0.153515	0.646202	0.799717	0	0.651014	2.20578	1.55477	6_preB_G1	4_proB_G1	NA
PTPN2	1	0	0	up	NA	6.55858e-30	-0.15443	0.759937	0.914367	0	0.587048	1.96721	1.38017	6_preB_G1	4_proB_G1	NA
CD38	1	0	0	up	NA	2.99482e-33	-0.15461	0.568674	0.723284	0	0.641899	2.20712	1.56522	6_preB_G1	4_proB_G1	NA
CD72	1	0	0	up	NA	4.99443e-35	-0.155578	0.709957	0.865534	2.0404e-14	0.46575	1.95522	1.48947	6_preB_G1	4_proB_G1	NA
PTPRC	1	0	0	up	NA	4.90902e-37	-0.156242	0.756002	0.912243	0	0.619355	1.99839	1.37903	6_preB_G1	4_proB_G1	NA
MCTP2	1	0	0	up	NA	4.97469e-30	-0.157958	0.770563	0.928521	1.87968e-11	0.536352	1.78388	1.24752	6_preB_G1	4_proB_G1	NA
P2RX5	1	0	0	up	NA	6.44796e-28	-0.159013	0.735537	0.894551	8.25485e-05	0.411254	2.16964	1.75839	6_preB_G1	4_proB_G1	NA
HERPUD1	1	0	0	up	NA	1.7118e-33	-0.160349	0.736324	0.896674	2.11042e-15	0.505439	2.03284	1.5274	6_preB_G1	4_proB_G1	NA
FBXO25	1	0	0	up	NA	4.42806e-34	-0.161404	0.785518	0.946921	6.89184e-11	0.567829	1.7945	1.22667	6_preB_G1	4_proB_G1	NA
[truncated: 71 more rows]

## Sheet: TBL_preBG1_II.vs.preBG1_I 
gene	DZ	DE	DM	sign_by_DZ	sign_by_DE	zero.pvalue.adj	zero_proportion_difference	c1.zero_proportion	c2.zero_proportion	nonzero.pvalue.adj	relative_difference	c1.maxmean	c2.maxmean	c1.celltype	c2.celltype	DM_nro_clusters_direction
[truncated: 198 more rows]

[truncated: 12 more sheets: TBL_leukG1.vs.proBG1, TBL_leukG2MS.vs.proBG2MS, TBL_ALL10.vs.ALL10-d15.G1, TBL_ALL12.vs.ALL12-d15.G1, TBL_ALL10.vs.ALL10-d15.G2MS, TBL_ALL12.vs.ALL12-d15.G2MS, TBL_leukG1.vs.proBG1_pedBM, TBL_leukG2MS.vs.proBG2MS_pedBM, TBL_REH_G1.TK, TBL_REH_G2MS.TK, TBL_REH_G1.XR, TBL_REH_G2MS.XR]
